# Supplementary material for: Prevalence and diversity of type VI secretion systems in a model beneficial symbiosis
Source: Front Microbiol. 2022 Sep 14;13:988044. doi: 10.3389/fmicb.2022.988044 (PMC9515649; doi:10.3389/fmicb.2022.988044)
Supplement: Supplementary file 1 [file Table_1.XLSX]

## Sheet: Table_S1
Table S1. Squid used for bacterial isolation
Squid ID	Squid species	Sex	Date entered lab	Date of death	Length of time in lab (days)	Date of dissection	Mantle length (mm)	Weight (g)
ESM429	Euprymna scolopes	Male	12/1/2017	12/4/2017	3	8/28/2019	24	6.2
ESF436	Euprymna scolopes	Female	4/2/2018	4/5/2018	3	8/27/2019	15	3.8
ESF442	Euprymna scolopes	Female	6/6/2018	9/10/2018	96	8/28/2019	28	11.1
LB10	Lolliguncula brevis	Unknown sub-adult	NA	NA	NA	6/12/2017	46	7.9

## Sheet: Table_S2
Table S2. Genome statistics
Strain	Genome size (Mbp)	Number of Contigs	Number of CDS	N50 (bp)	GC content (%)	CheckM Completion (%)	Strain Isolation Source
V. fischeri ESM429_1	4.1	46	3,687	480,010	38.3	99.9	Euprymna scolopes light organ
V. fischeri ESM429_3	4.1	45	3,685	370,982	38.3	99.9	Euprymna scolopes light organ
V. fischeri ESM429_4	4.42	77	4,053	190,339	38.1	99.9	Euprymna scolopes light organ
V. fischeri ESF436_3	4.13	35	3,706	346,134	38.2	99.9	Euprymna scolopes light organ
V. fischeri ESF436_4	4.13	33	3,708	346,163	38.2	99.9	Euprymna scolopes light organ
V. fischeri ESF436_5	4.18	50	3,756	272,962	38.3	99.9	Euprymna scolopes light organ
V. fischeri ESF436_6	4.13	35	3,706	346,187	38.2	99.9	Euprymna scolopes light organ
V. fischeri ESF442_5	4.05	44	3,624	472,834	38.2	99.9	Euprymna scolopes light organ
V. fischeri ESF442_6	4.04	41	3,626	326,805	38.2	99.9	Euprymna scolopes light organ
V. fischeri LB10LO6	4.1	81	3,651	231,287	38.3	99.9	Lolliguncula brevis light organ-like structure
V. campbelli KNH1	6.01	126	5,426	157,660	45.5	100.0	Seawater, Hawaii, USA

## Sheet: Table_S3
Table S3. Genomes analyzed and predicted T6SS clusters. Strains highlighted in yellow were isolated from bobtail squid.
Genus	Species	Strain	NCBI Accession	BioSample Accession	Isolation source	Source summary	Cluster #	T6SS Group	Contig	Start position	Stop position	Length (bp)	Cluster cutoff at beginning/end of contig?	Percent mandatory genes detected	Percent accessory genes detected	Number of core genes detected													Number of accessory genes detected
																TssA	TssB	TssC	TssD	TssE	TssF	TssG	TssH	TssI	TssJ	TssK	TssL	TssM	DUF4150	FHA	ImpE	PAAR_motif	Pkinase	PP2C	TagF_N	TasL	TasR	VasH
Acidovorax	citrulli	AAC00-1	GCF_000015325.1	SAMN02598334	Citrullus lanatus	Host	1	3	NC_008752.1	1604726	1642988	38262	No	92.3077	40	1	1	1	1	1	1	1	3	0	1	1	1	1	0	1	1	0	1	0	1	0	0	0
Acinetobacter	baumannii	ATCC 17978	GCF_013372085.1	SAMN14779651	Homo sapiens	Host	1	4b	NZ_CP053098.1	1388762	1416451	27689	No	92.3077	20	1	1	1	1	1	1	1	1	1	0	1	2	1	0	0	0	1	0	0	1	0	0	0
Aeromonas	hydrophila subsp. hydrophila	ATCC 7966	GCF_000014805.1	SAMN02604052	Contaminated canned milk	Environmental	1	1	NC_008570.1	1990515	2031403	40888	No	100	20	2	1	1	1	1	1	1	2	2	1	1	1	1	0	1	0	1	0	0	0	0	0	0
Agrobacterium	tumefaciens	C58	GCF_000092025.1	SAMN02603108	Cherry tree tumor	Host	1	5	NC_003063.2	1458366	1486757	28391	No	92.3077	50	1	1	2	1	1	1	1	1	1	0	1	1	1	0	1	1	1	1	0	1	0	0	0
Azoarcus	olearius	BH72	GCF_000061505.1	SAMEA3138261	Grass endophyte	Host	1	4b	NC_008702.1	1399088	1441617	42529	No	92.3077	30	1	1	1	1	1	1	1	0	1	1	1	1	1	0	0	0	1	1	1	0	0	0	0
Azoarcus	olearius	BH72	GCF_000061505.1	SAMEA3138261	Grass endophyte	Host	2	3	NC_008702.1	4249321	4289066	39745	No	100	50	1	1	1	2	1	1	1	1	1	1	1	1	1	1	1	1	0	2	0	1	0	0	0
Bacteroides	fragilis	NCTC 9343	GCF_000025985.1	SAMEA1705957	Homo sapiens	Host	1	NA	NC_003228.3	2348911	2370215	21304	No	61.5385	10	0	1	1	0	1	1	1	1	1	0	1	0	0	0	0	0	1	0	0	0	0	0	0
Burkholderia	thailandensis	E264	GCF_003568605.1	SAMN02866398	Rice field soil	Environmental	1	4b	NZ_CP008786.1	212790	232809	20019	No	92.3077	10	1	1	1	1	1	1	1	1	0	1	1	2	1	0	0	0	0	0	0	1	0	0	0
Burkholderia	thailandensis	E264	GCF_003568605.1	SAMN02866398	Rice field soil	Environmental	2	3	NZ_CP008786.1	483042	509403	26361	No	100	10	1	1	1	1	1	1	1	1	2	1	1	1	1	1	0	0	0	0	0	0	0	0	0
Burkholderia	thailandensis	E264	GCF_003568605.1	SAMN02866398	Rice field soil	Environmental	3	1	NZ_CP008786.1	1765600	1793759	28159	No	100	10	1	1	1	1	1	1	1	1	1	1	1	1	1	1	0	0	0	0	0	0	0	0	0
Burkholderia	thailandensis	E264	GCF_003568605.1	SAMN02866398	Rice field soil	Environmental	4	3	NZ_CP008786.1	2462743	2488258	25515	No	100	30	1	1	1	1	1	1	1	1	1	1	1	1	1	0	1	0	0	1	0	1	0	0	0
Burkholderia	thailandensis	E264	GCF_003568605.1	SAMN02866398	Rice field soil	Environmental	5	3	NZ_CP008786.1	2621689	2653516	31827	No	100	20	1	1	1	1	1	1	1	1	1	1	1	3	1	0	0	1	1	0	0	0	0	0	0
Campylobacter	jejuni	108	JX436460.1	NA	Homo sapiens (stool from patient with enteritis)	Host	1	1	NA	NA	NA	17012	NA	76.9231	0	0	1	1	1	1	1	1	0	1	1	1	1	0	0	0	0	0	0	0	0	0	0	0
Citrobacter	rodentium	ICC168	GCF_000027085.1	SAMEA2272524	Mus musculus	Host	1	3	NC_013716.1	2914927	2946102	31175	No	100	20	1	1	1	1	1	1	1	1	1	1	1	2	2	0	0	1	1	0	0	0	0	0	0
Citrobacter	rodentium	ICC168	GCF_000027085.1	SAMEA2272524	Mus musculus	Host	2	4a	NC_013716.1	3590565	3606354	15789	No	100	10	1	1	1	1	1	1	1	1	1	1	1	1	1	0	0	0	1	0	0	0	0	0	0
Edwardsiella	tarda	EIB202	GCF_000020865.1	SAMN02603129	Scophthalmus maximus	Host	1	4b	NC_013508.1	2555386	2575336	19950	No	100	10	1	1	1	1	1	1	1	1	1	1	1	1	1	0	0	0	1	0	0	0	0	0	0
Enterobacter	cloacae subsp. cloacae	ATCC 13047	GCF_000025565.1	SAMN02603901	Homo sapiens (cerebrospinal fluid)	Host	1	3	NC_014121.1	1551980	1595931	43951	No	100	60	1	1	1	1	1	1	1	1	3	1	1	1	1	0	1	1	1	1	1	1	0	0	0
Enterobacter	cloacae subsp. cloacae	ATCC 13047	GCF_000025565.1	SAMN02603901	Homo sapiens (cerebrospinal fluid)	Host	2	2	NC_014121.1	1819466	1846026	26560	No	92.3077	10	2	1	1	0	1	1	1	1	2	1	1	1	1	0	0	0	1	0	0	0	0	0	0
Escherichia	coli	042	GCA_014156815.1	SAMN09866729	Chroicocephalus (rectal swab)	Host	1	2	NA	NA	NA	32563	NA	100	0	2	1	1	1	1	1	1	1	1	1	1	1	2	0	0	0	0	0	0	0	0	0	0
Escherichia	coli	042	GCA_014156815.1	SAMN09866729	Chroicocephalus (rectal swab)	Host	2	4b	NA	NA	NA	23738	NA	92.3077	0	2	1	1	0	1	1	1	1	1	1	1	1	1	0	0	0	0	0	0	0	0	0	0
Klebsiella	pneumoniae	NTUH-K2044	GCF_000009885.1	SAMD00060934	Homo sapiens (blood from patient with liver abscess and meningitis)	Host	1	2	NC_012731.1	2298860	2328477	29617	No	92.3077	10	1	1	1	1	0	1	1	1	1	1	1	2	1	0	0	0	1	0	0	0	0	0	0
Klebsiella	pneumoniae	NTUH-K2044	GCF_000009885.1	SAMD00060934	Homo sapiens (blood from patient with liver abscess and meningitis)	Host	2	2	NC_012731.1	3190436	3214872	24436	No	69.2308	10	1	0	0	0	1	1	1	0	1	1	1	1	2	0	0	0	1	0	0	0	0	0	0
Leisingera	aquaemixtae	CECT8399	GCA_001458395.1	SAMEA3539551	Sea water mixed with spring water, Jeju Island, South Korea	Environmental	1	3	NZ_CYSR01000007.1	28952	68486	39534	No	92.3077	60	1	1	3	1	1	1	1	1	1	0	1	2	1	0	1	1	1	1	1	1	0	0	0
Leisingera	aquaemixtae	DP2N28-1	GCA_019801145.1	SAMN19953105	Offshore sea sediment, Shenzen, China	Environmental	1	3	JAHVJQ010000005.1	209505	250355	40850	No	92.3077	60	1	1	3	1	1	1	1	1	1	0	1	3	1	0	1	1	1	1	1	1	0	0	0
Leisingera	aquaemixtae	R2C4	GCA_006740765.1	SAMN12141652	Biocathode MCL, marine biofilm	Environmental	1	3	NZ_CP041164.1	73442	105432	31990	No	92.3077	60	1	1	3	1	1	1	1	1	1	0	1	1	1	0	1	1	1	1	1	1	0	0	0
Leisingera	aquimarina	DSM24565	GCA_000473165.1	SAMN02441453	Marine biofilm on electrode, Genova harbor, Italy	Environmental	1	3	NZ_KI421506.1	52333	92801	40468	No	92.3077	60	1	1	3	1	1	1	1	1	1	0	1	3	1	0	1	1	1	1	1	1	0	0	0
Leisingera	caerulea	DSM24564	GCA_000473325.1	SAMN02440718	Marine biofilm on electrode, Genova harbor, Italy	Environmental	1	3	NZ_AXBI01000012.1	1348	19946	18598	No	69.2308	10	1	1	1	1	1	1	1	1	0	0	0	1	0	0	0	1	0	0	0	0	0	0	0
Leisingera	daeponensis	DP1N14-2	GCA_019801465.1	SAMN19953085	Offshore sea sediment, Shenzen, China	Environmental	1	3	JAHVJA010000005.1	131501	172055	40554	No	92.3077	60	1	1	3	1	1	1	1	1	1	0	1	3	1	0	1	1	1	1	1	1	0	0	0
Leisingera	daeponensis	DP1Y21-2	GCA_019801275.1	SAMN19953098	Offshore sea sediment, Shenzen, China	Environmental	1	3	JAHVJL010000018.1	10249	50484	40235	No	92.3077	60	1	1	3	1	1	1	1	1	1	0	1	3	1	0	1	1	1	1	1	1	0	0	0
Leisingera	daeponensis	DSM23529	GCA_000473145.1	SAMN02440716	Tidal flat sediment, Yellow Sea, South Korea	Environmental	1	3	NZ_KI421502.1	130166	170196	40030	No	92.3077	60	1	1	3	1	1	1	1	1	1	0	1	3	1	0	1	1	1	1	1	1	0	0	0
Leisingera	methylohalidivorans	DSM14336	GCA_000511355.1	SAMN02769646	Tide pool seawater	Environmental	1	3	NC_023136.1	228757	261944	33187	No	92.3077	60	1	1	3	1	1	1	1	1	1	0	1	2	1	0	1	1	1	1	1	1	0	0	0
Leisingera	sp	ANG1	GCA_000203975.3	SAMN02471702	Accessory nidamental gland of Euprymna scolopes, Hawaii	Host	1	3	NZ_AFCF02000009.1	56926	97555	40629	No	92.3077	60	1	1	3	1	1	1	1	1	1	0	1	3	1	0	1	1	1	1	1	1	0	0	0
Leisingera	sp	ANG59	GCA_013317235.1	SAMN13291773	Accessory nidamental gland of Euprymna scolopes, Hawaii	Host	1	3	NZ_WLCM01000017.1	43418	83970	40552	No	92.3077	60	1	1	2	1	1	1	1	1	1	0	1	3	1	0	1	1	1	1	1	1	0	0	0
Leisingera	sp	ANG-DT	GCA_000813785.1	SAMN03246060	Accessory nidamental gland of Euprymna scolopes, Hawaii	Host	1	3	NZ_JWLE01000015.1	2556	35458	32902	No	92.3077	60	1	1	3	1	1	1	1	1	1	0	1	2	1	0	1	1	1	1	1	1	0	0	0
Leisingera	sp	ANG-M1	GCA_000813745.1	SAMN03246058	Accessory nidamental gland of Euprymna scolopes, Hawaii	Host	1	3	NZ_JWLC01000026.1	2219	35576	33357	No	92.3077	60	1	1	3	1	1	1	1	1	1	0	1	2	1	0	1	1	1	1	1	1	0	0	0
Leisingera	sp	ANG-M6	GCA_000813905.1	SAMN03246063	Accessory nidamental gland of Euprymna scolopes, Hawaii	Host	1	3	NZ_JWLG01000030.1	10485	43123	32638	No	92.3077	60	1	1	3	1	1	1	1	1	1	0	1	2	1	0	1	1	1	1	1	1	0	0	0
Leisingera	sp	ANG-M7	GCA_000813965.1	SAMN03246065	Accessory nidamental gland of Euprymna scolopes, Hawaii	Host	1	3	NZ_JWLI01000018.1	10838	43996	33158	No	92.3077	60	1	1	3	1	1	1	1	1	1	0	1	2	1	0	1	1	1	1	1	1	0	0	0
Leisingera	sp	ANG-M7	GCA_000813965.1	SAMN03246065	Accessory nidamental gland of Euprymna scolopes, Hawaii	Host	2	3	NZ_JWLI01000025.1	1530	14408	12878	No	61.5385	20	1	1	1	1	1	1	1	1	0	0	0	0	0	0	1	0	1	0	0	0	0	0	0
Leisingera	sp	ANG-S	GCA_000813885.1	SAMN03246061	Accessory nidamental gland of Euprymna scolopes, Hawaii	Host	1	3	NZ_JWLM01000027.1	1568	34781	33213	No	92.3077	60	1	1	3	1	1	1	1	1	1	0	1	2	1	0	1	1	1	1	1	1	0	0	0
Leisingera	sp	ANG-S3	GCA_000813945.1	SAMN03246062	Accessory nidamental gland of Euprymna scolopes, Hawaii	Host	1	3	NZ_JWLF01000014.1	1625	34839	33214	No	92.3077	60	1	1	3	1	1	1	1	1	1	0	1	2	1	0	1	1	1	1	1	1	0	0	0
Leisingera	sp	ANG-S5	GCA_000813925.1	SAMN03246064	Accessory nidamental gland of Euprymna scolopes, Hawaii	Host	1	3	NZ_JWLH01000006.1	56918	97499	40581	No	92.3077	60	1	1	3	1	1	1	1	1	1	0	1	3	1	0	1	1	1	1	1	1	0	0	0
Leisingera	sp	ANG-VP	GCA_000813725.1	SAMN03246059	Accessory nidamental gland of Euprymna scolopes, Hawaii	Host	1	3	NZ_JWLD01000073.1	3952	37436	33484	No	92.3077	60	1	1	3	1	1	1	1	1	1	0	1	2	1	0	1	1	1	1	1	1	0	0	0
Leisingera	sp	F5	GCA_001593695.1	SAMN04545891	Marine bulk water (WCO station L4), English Channel (Metagenome assembled)	Environmental	1	3	LUKH01000016.1	49174	89210	40036	No	92.3077	60	1	1	3	1	1	1	1	1	1	0	1	3	1	0	1	1	1	1	1	1	0	0	0
Leisingera	sp	HS039	GCA_018101175.1	SAMN18268726	Hydractinia symbiolongicarpus	Host	1	3	JAGEUH010000010.1	3112	43444	40332	No	92.3077	60	1	1	3	1	1	1	1	1	1	0	1	3	1	0	1	1	1	1	1	1	0	0	0
Leisingera	sp	JC1	GCA_001679925.1	SAMN05178899	Egg jelly coat of Euprymna scolopes, Hawaii	Host	1	3	NZ_LYUZ01000107.1	3330	28736	25406	No	84.6154	30	1	1	3	1	1	1	1	1	1	0	1	1	0	0	1	1	1	0	0	0	0	0	0
Leisingera	sp	JC1	GCA_001679925.1	SAMN05178899	Egg jelly coat of Euprymna scolopes, Hawaii	Host	2	3	NZ_LYUZ01000142.1	101	9392	9291	No	61.5385	0	1	1	1	1	1	2	1	1	0	0	0	0	0	0	0	0	0	0	0	0	0	0	0
Leisingera	sp	McT4-56	GCA_020514995.1	SAMN22081182	Montastraea cavernosa surface mucus layer and tissue, Florida, USA	Host	1	3	JAJALF010000029.1	3673	36936	33263	No	92.3077	60	1	1	3	1	1	1	1	1	1	0	1	2	1	0	1	1	1	1	1	1	0	0	0
Leisingera	sp	NJS201	GCA_004535885.1	SAMN10756573	Marine biofilm, California, USA	Environmental	1	3	NZ_CP038239.1	1751	18918	17167	No	69.2308	10	1	1	1	1	1	1	1	2	0	0	0	1	0	0	0	1	0	0	0	0	0	0	0
Leisingera	sp	NJS204	GCA_004123675.1	SAMN10756574	Marine biofilm, California, USA	Environmental	1	3	NZ_CP035419.1	72354	112689	40335	No	92.3077	60	1	1	3	1	1	1	1	1	1	0	1	3	1	0	1	1	1	1	1	1	0	0	0
Leisingera	sp	UBA4491	GCA_002388965.1	SAMN06450414	Biofilm on cathode of MCL, Washington DC, USA (Metagenome assembled)	Environmental	1	3	DGNN01000024.1	3611	35601	31990	No	92.3077	60	1	1	3	1	1	1	1	1	1	0	1	1	1	0	1	1	1	1	1	1	0	0	0
Myxococcus	xanthus	DK 1622	GCF_000012685.1	SAMN02604018	Soil	Environmental	1	1	NC_008095.1	6001993	6061912	59919	No	100	20	1	1	1	1	1	1	1	5	1	1	1	2	1	0	0	0	0	2	0	1	0	0	0
Phaeobacter	gallaeciensis	C3M10	GCA_003318155.1	SAMN09522133	Coastal surface sea water, Massachusetts, USA	Environmental	0	NA	NA	NA	NA	NA	NA	NA	NA	NA	NA	NA	NA	NA	NA	NA	NA	NA	NA	NA	NA	NA	NA	NA	NA	NA	NA	NA	NA	NA	NA	NA
Phaeobacter	gallaeciensis	DSM_26640	GCA_000819625.1	SAMN03287063	Seawater from larval cultures of Pecten maximus	Environmental	0	NA	NA	NA	NA	NA	NA	NA	NA	NA	NA	NA	NA	NA	NA	NA	NA	NA	NA	NA	NA	NA	NA	NA	NA	NA	NA	NA	NA	NA	NA	NA
Phaeobacter	gallaeciensis	JL2886	GCA_001678945.1	SAMN04574079	Deep sea water, South China Sea, China	Environmental	0	NA	NA	NA	NA	NA	NA	NA	NA	NA	NA	NA	NA	NA	NA	NA	NA	NA	NA	NA	NA	NA	NA	NA	NA	NA	NA	NA	NA	NA	NA	NA
Phaeobacter	gallaeciensis	P11	GCA_002381305.1	SAMN03292294	Clam larvae aquaculture, France	Environmental	0	NA	NA	NA	NA	NA	NA	NA	NA	NA	NA	NA	NA	NA	NA	NA	NA	NA	NA	NA	NA	NA	NA	NA	NA	NA	NA	NA	NA	NA	NA	NA
Phaeobacter	gallaeciensis	P128	GCA_002381365.1	SAMN06834800	Plankton, North Pacific	Environmental	0	NA	NA	NA	NA	NA	NA	NA	NA	NA	NA	NA	NA	NA	NA	NA	NA	NA	NA	NA	NA	NA	NA	NA	NA	NA	NA	NA	NA	NA	NA	NA
Phaeobacter	gallaeciensis	P129	GCA_002381385.1	SAMN06834809	Plankton, Bering Sea	Environmental	0	NA	NA	NA	NA	NA	NA	NA	NA	NA	NA	NA	NA	NA	NA	NA	NA	NA	NA	NA	NA	NA	NA	NA	NA	NA	NA	NA	NA	NA	NA	NA
Phaeobacter	gallaeciensis	P14	GCA_002407245.1	SAMN03294467	Rotifer aquaculture, Spain	Environmental	0	NA	NA	NA	NA	NA	NA	NA	NA	NA	NA	NA	NA	NA	NA	NA	NA	NA	NA	NA	NA	NA	NA	NA	NA	NA	NA	NA	NA	NA	NA	NA
Phaeobacter	gallaeciensis	P63	GCA_002393525.1	SAMN03294483	Algae aquaculture, Spain	Environmental	0	NA	NA	NA	NA	NA	NA	NA	NA	NA	NA	NA	NA	NA	NA	NA	NA	NA	NA	NA	NA	NA	NA	NA	NA	NA	NA	NA	NA	NA	NA	NA
Phaeobacter	gallaeciensis	P73	GCA_002381325.1	SAMN03294489	Clam larvae aquaculture, Spain	Environmental	0	NA	NA	NA	NA	NA	NA	NA	NA	NA	NA	NA	NA	NA	NA	NA	NA	NA	NA	NA	NA	NA	NA	NA	NA	NA	NA	NA	NA	NA	NA	NA
Phaeobacter	gallaeciensis	P75	GCA_002381285.1	SAMN03294491	Clam larvae aquaculture, Spain	Environmental	0	NA	NA	NA	NA	NA	NA	NA	NA	NA	NA	NA	NA	NA	NA	NA	NA	NA	NA	NA	NA	NA	NA	NA	NA	NA	NA	NA	NA	NA	NA	NA
Phaeobacter	inhibens	2.1	GCA_000154745.2	SAMN02603622	Surface water of tidal mud flat, North Sea	Environmental	0	NA	NA	NA	NA	NA	NA	NA	NA	NA	NA	NA	NA	NA	NA	NA	NA	NA	NA	NA	NA	NA	NA	NA	NA	NA	NA	NA	NA	NA	NA	NA
Phaeobacter	inhibens	BS107	GCA_003443575.1	SAMN09780823	Pure culture marine broth	Environmental	0	NA	NA	NA	NA	NA	NA	NA	NA	NA	NA	NA	NA	NA	NA	NA	NA	NA	NA	NA	NA	NA	NA	NA	NA	NA	NA	NA	NA	NA	NA	NA
Phaeobacter	inhibens	DOK1-1	GCA_001969345.1	SAMN06234523	Seawater, East Sea, South Korea	Environmental	0	NA	NA	NA	NA	NA	NA	NA	NA	NA	NA	NA	NA	NA	NA	NA	NA	NA	NA	NA	NA	NA	NA	NA	NA	NA	NA	NA	NA	NA	NA	NA
Phaeobacter	inhibens	DSM_16374	GCA_000473105.1	SAMN02440777	Water sample, Germany	Environmental	0	NA	NA	NA	NA	NA	NA	NA	NA	NA	NA	NA	NA	NA	NA	NA	NA	NA	NA	NA	NA	NA	NA	NA	NA	NA	NA	NA	NA	NA	NA	NA
Phaeobacter	inhibens	DSM_17395	GCA_000154765.2	SAMN02603623	Seawater from larval cultures of Pecten maximus	Environmental	0	NA	NA	NA	NA	NA	NA	NA	NA	NA	NA	NA	NA	NA	NA	NA	NA	NA	NA	NA	NA	NA	NA	NA	NA	NA	NA	NA	NA	NA	NA	NA
Phaeobacter	inhibens	P10	GCA_002888685.1	SAMN03292293	Biofilm from boat, France	Environmental	0	NA	NA	NA	NA	NA	NA	NA	NA	NA	NA	NA	NA	NA	NA	NA	NA	NA	NA	NA	NA	NA	NA	NA	NA	NA	NA	NA	NA	NA	NA	NA
Phaeobacter	inhibens	P24	GCA_002891665.1	SAMN03294470	Cleaning system aquaculture, Denmark	Environmental	0	NA	NA	NA	NA	NA	NA	NA	NA	NA	NA	NA	NA	NA	NA	NA	NA	NA	NA	NA	NA	NA	NA	NA	NA	NA	NA	NA	NA	NA	NA	NA
Phaeobacter	inhibens	P30	GCA_002892205.1	SAMN03294471	Cleaning system aquaculture, Denmark	Environmental	0	NA	NA	NA	NA	NA	NA	NA	NA	NA	NA	NA	NA	NA	NA	NA	NA	NA	NA	NA	NA	NA	NA	NA	NA	NA	NA	NA	NA	NA	NA	NA
Phaeobacter	inhibens	P48	GCA_002892265.1	SAMN03294474	Fish larvae aquaculture, Denmark	Environmental	0	NA	NA	NA	NA	NA	NA	NA	NA	NA	NA	NA	NA	NA	NA	NA	NA	NA	NA	NA	NA	NA	NA	NA	NA	NA	NA	NA	NA	NA	NA	NA
Phaeobacter	inhibens	P51	GCA_002891985.1	SAMN03294475	Fish larvae aquaculture, Denmark	Environmental	0	NA	NA	NA	NA	NA	NA	NA	NA	NA	NA	NA	NA	NA	NA	NA	NA	NA	NA	NA	NA	NA	NA	NA	NA	NA	NA	NA	NA	NA	NA	NA
Phaeobacter	inhibens	P54	GCA_002892185.1	SAMN03294476	Zooplankton aquaculture, Denmark	Environmental	0	NA	NA	NA	NA	NA	NA	NA	NA	NA	NA	NA	NA	NA	NA	NA	NA	NA	NA	NA	NA	NA	NA	NA	NA	NA	NA	NA	NA	NA	NA	NA
Phaeobacter	inhibens	P57	GCA_002892005.1	SAMN03294477	Zooplankton aquaculture, Denmark	Environmental	0	NA	NA	NA	NA	NA	NA	NA	NA	NA	NA	NA	NA	NA	NA	NA	NA	NA	NA	NA	NA	NA	NA	NA	NA	NA	NA	NA	NA	NA	NA	NA
Phaeobacter	inhibens	P59	GCA_002892165.1	SAMN03294478	Zooplankton aquaculture, Denmark	Environmental	0	NA	NA	NA	NA	NA	NA	NA	NA	NA	NA	NA	NA	NA	NA	NA	NA	NA	NA	NA	NA	NA	NA	NA	NA	NA	NA	NA	NA	NA	NA	NA
Phaeobacter	inhibens	P66	GCA_002892065.1	SAMN03294485	Algae aquaculture, Denmark	Environmental	0	NA	NA	NA	NA	NA	NA	NA	NA	NA	NA	NA	NA	NA	NA	NA	NA	NA	NA	NA	NA	NA	NA	NA	NA	NA	NA	NA	NA	NA	NA	NA
Phaeobacter	inhibens	P70	GCA_002892125.1	SAMN03294486	Algae aquaculture, Denmark	Environmental	0	NA	NA	NA	NA	NA	NA	NA	NA	NA	NA	NA	NA	NA	NA	NA	NA	NA	NA	NA	NA	NA	NA	NA	NA	NA	NA	NA	NA	NA	NA	NA
Phaeobacter	inhibens	P72	GCA_002891945.1	SAMN03294488	Clam larvae aquaculture, Spain	Environmental	0	NA	NA	NA	NA	NA	NA	NA	NA	NA	NA	NA	NA	NA	NA	NA	NA	NA	NA	NA	NA	NA	NA	NA	NA	NA	NA	NA	NA	NA	NA	NA
Phaeobacter	inhibens	P74	GCA_002892045.1	SAMN03294490	Clam larvae aquaculture, Spain	Environmental	0	NA	NA	NA	NA	NA	NA	NA	NA	NA	NA	NA	NA	NA	NA	NA	NA	NA	NA	NA	NA	NA	NA	NA	NA	NA	NA	NA	NA	NA	NA	NA
Phaeobacter	inhibens	P78	GCA_002891965.1	SAMN03294492	Clam larvae aquaculture, Spain	Environmental	0	NA	NA	NA	NA	NA	NA	NA	NA	NA	NA	NA	NA	NA	NA	NA	NA	NA	NA	NA	NA	NA	NA	NA	NA	NA	NA	NA	NA	NA	NA	NA
Phaeobacter	inhibens	P80	GCA_002892145.1	SAMN03294493	Clam larvae aquaculture, Spain	Environmental	0	NA	NA	NA	NA	NA	NA	NA	NA	NA	NA	NA	NA	NA	NA	NA	NA	NA	NA	NA	NA	NA	NA	NA	NA	NA	NA	NA	NA	NA	NA	NA
Phaeobacter	inhibens	P83	GCA_002892225.1	SAMN03294494	Clam larvae aquaculture, Spain	Environmental	0	NA	NA	NA	NA	NA	NA	NA	NA	NA	NA	NA	NA	NA	NA	NA	NA	NA	NA	NA	NA	NA	NA	NA	NA	NA	NA	NA	NA	NA	NA	NA
Phaeobacter	inhibens	P88	GCA_002892085.1	SAMN03294495	Clam larvae aquaculture, Spain	Environmental	0	NA	NA	NA	NA	NA	NA	NA	NA	NA	NA	NA	NA	NA	NA	NA	NA	NA	NA	NA	NA	NA	NA	NA	NA	NA	NA	NA	NA	NA	NA	NA
Phaeobacter	inhibens	P92	GCA_002892025.1	SAMN03294496	Clam larvae aquaculture, Spain	Environmental	0	NA	NA	NA	NA	NA	NA	NA	NA	NA	NA	NA	NA	NA	NA	NA	NA	NA	NA	NA	NA	NA	NA	NA	NA	NA	NA	NA	NA	NA	NA	NA
Phaeobacter	inhibens	S4Sm	GCA_001559785.1	SAMN04305441	Crassostrea virginica, Rhode Island, USA	Host	0	NA	NA	NA	NA	NA	NA	NA	NA	NA	NA	NA	NA	NA	NA	NA	NA	NA	NA	NA	NA	NA	NA	NA	NA	NA	NA	NA	NA	NA	NA	NA
Phaeobacter	italicus	CECT7321	GCA_001251095.1	SAMEA3393042	Water from Sparus aurata larvae culture	Environmental	0	NA	NA	NA	NA	NA	NA	NA	NA	NA	NA	NA	NA	NA	NA	NA	NA	NA	NA	NA	NA	NA	NA	NA	NA	NA	NA	NA	NA	NA	NA	NA
Phaeobacter	italicus	CECT7645	GCA_001258055.1	SAMEA3393043	Cathode exposed to natural sea water, Italy	Environmental	0	NA	NA	NA	NA	NA	NA	NA	NA	NA	NA	NA	NA	NA	NA	NA	NA	NA	NA	NA	NA	NA	NA	NA	NA	NA	NA	NA	NA	NA	NA	NA
Phaeobacter	italicus	DSM_26436	GCA_900113345.1	SAMN04488019	Marine biofilm on electrode, Genova harbor Italy	Environmental	0	NA	NA	NA	NA	NA	NA	NA	NA	NA	NA	NA	NA	NA	NA	NA	NA	NA	NA	NA	NA	NA	NA	NA	NA	NA	NA	NA	NA	NA	NA	NA
Phaeobacter	marinintestinus	UBM7	GCA_007923355.1	SAMN12305640	Sea cucumber, South Korea	Host	0	NA	NA	NA	NA	NA	NA	NA	NA	NA	NA	NA	NA	NA	NA	NA	NA	NA	NA	NA	NA	NA	NA	NA	NA	NA	NA	NA	NA	NA	NA	NA
Phaeobacter	piscinae	P13	GCA_002412045.1	SAMN03292295	Fish larvae aquaculture, Spain	Environmental	0	NA	NA	NA	NA	NA	NA	NA	NA	NA	NA	NA	NA	NA	NA	NA	NA	NA	NA	NA	NA	NA	NA	NA	NA	NA	NA	NA	NA	NA	NA	NA
Phaeobacter	piscinae	P18	GCA_002891925.1	SAMN03294468	Fish larvae aquaculture, Spain	Environmental	0	NA	NA	NA	NA	NA	NA	NA	NA	NA	NA	NA	NA	NA	NA	NA	NA	NA	NA	NA	NA	NA	NA	NA	NA	NA	NA	NA	NA	NA	NA	NA
Phaeobacter	piscinae	P23	GCA_002888715.1	SAMN03294469	Cleaning system aquaculture, Denmark	Environmental	0	NA	NA	NA	NA	NA	NA	NA	NA	NA	NA	NA	NA	NA	NA	NA	NA	NA	NA	NA	NA	NA	NA	NA	NA	NA	NA	NA	NA	NA	NA	NA
Phaeobacter	piscinae	P36	GCA_002412025.1	SAMN03294472	Fish aquaculture, Denmark	Environmental	0	NA	NA	NA	NA	NA	NA	NA	NA	NA	NA	NA	NA	NA	NA	NA	NA	NA	NA	NA	NA	NA	NA	NA	NA	NA	NA	NA	NA	NA	NA	NA
Phaeobacter	piscinae	P42	GCA_002892245.1	SAMN03294473	Fish aquaculture, Denmark	Environmental	0	NA	NA	NA	NA	NA	NA	NA	NA	NA	NA	NA	NA	NA	NA	NA	NA	NA	NA	NA	NA	NA	NA	NA	NA	NA	NA	NA	NA	NA	NA	NA
Phaeobacter	piscinae	P71	GCA_002891905.1	SAMN03294487	Clam larvae aquaculture, Spain	Environmental	0	NA	NA	NA	NA	NA	NA	NA	NA	NA	NA	NA	NA	NA	NA	NA	NA	NA	NA	NA	NA	NA	NA	NA	NA	NA	NA	NA	NA	NA	NA	NA
Phaeobacter	piscinae	S26	GCA_000826835.1	SAMN03159524	Fish tank outlet, Greece	Environmental	0	NA	NA	NA	NA	NA	NA	NA	NA	NA	NA	NA	NA	NA	NA	NA	NA	NA	NA	NA	NA	NA	NA	NA	NA	NA	NA	NA	NA	NA	NA	NA
Phaeobacter	porticola	P97	GCA_001888185.1	SAMN05300637	Barnacle, Wadden Sea	Host	0	NA	NA	NA	NA	NA	NA	NA	NA	NA	NA	NA	NA	NA	NA	NA	NA	NA	NA	NA	NA	NA	NA	NA	NA	NA	NA	NA	NA	NA	NA	NA
Phaeobacter	sp	11ANDIMAR09	GCA_001294455.1	SAMN03996103	Harbor coastal water, Spain	Environmental	1	3	NZ_LIKT01000015.1	46623	86447	39824	No	92.3077	60	1	1	3	1	1	1	1	1	1	0	1	3	1	0	1	1	1	1	1	1	0	0	0
Phaeobacter	sp	22II1-1F12B	GCA_002210165.1	SAMN07274263	Deep sea water, Atlantic Ocean	Environmental	1	3	NZ_AQQP01000004.1	256238	295963	39725	No	92.3077	50	1	1	3	1	1	1	1	1	1	0	1	3	1	0	1	1	0	1	1	1	0	0	0
Phaeobacter	sp	B1627	GCA_006265095.1	SAMN11843736	Brown seaweed, China	Host	1	3	NZ_VCNK01000020.1	139248	188364	49116	No	92.3077	50	1	1	3	1	1	1	1	1	1	0	1	3	1	0	1	1	0	1	1	1	0	0	0
Phaeobacter	sp	CECT5382	GCA_001457775.1	SAMEA3535146	Oyster, Mediterranean Sea	Host	0	NA	NA	NA	NA	NA	NA	NA	NA	NA	NA	NA	NA	NA	NA	NA	NA	NA	NA	NA	NA	NA	NA	NA	NA	NA	NA	NA	NA	NA	NA	NA
Phaeobacter	sp	CECT7736	GCA_001458215.1	SAMEA3542137	Surface sea water, Georgia, USA	Environmental	0	NA	NA	NA	NA	NA	NA	NA	NA	NA	NA	NA	NA	NA	NA	NA	NA	NA	NA	NA	NA	NA	NA	NA	NA	NA	NA	NA	NA	NA	NA	NA
Phaeobacter	sp	HF9A	GCF_011806385.1	SAMN14444639	Seawater inoculated into a synthetic phycosphere, Georgia, USA	Environmental	0	NA	NA	NA	NA	NA	NA	NA	NA	NA	NA	NA	NA	NA	NA	NA	NA	NA	NA	NA	NA	NA	NA	NA	NA	NA	NA	NA	NA	NA	NA	NA
Phaeobacter	sp	JL2872	GCA_003097275.1	SAMN08999379	Seawater, China	Environmental	0	NA	NA	NA	NA	NA	NA	NA	NA	NA	NA	NA	NA	NA	NA	NA	NA	NA	NA	NA	NA	NA	NA	NA	NA	NA	NA	NA	NA	NA	NA	NA
Phaeobacter	sp	LSS9	GCA_003443595.1	SAMN09780821	Pure culture marine broth	Environmental	0	NA	NA	NA	NA	NA	NA	NA	NA	NA	NA	NA	NA	NA	NA	NA	NA	NA	NA	NA	NA	NA	NA	NA	NA	NA	NA	NA	NA	NA	NA	NA
Phaeobacter	sp	S60	GCA_000826845.1	SAMN03159525	Fish tank outlet, Greece	Environmental	0	NA	NA	NA	NA	NA	NA	NA	NA	NA	NA	NA	NA	NA	NA	NA	NA	NA	NA	NA	NA	NA	NA	NA	NA	NA	NA	NA	NA	NA	NA	NA
Proteus	mirabilis	BB2000	GCF_000444425.1	SAMN02603303	Homo sapiens	Host	1	1	NC_022000.1	916585	948555	31970	No	100	10	2	1	1	2	1	2	1	1	1	1	1	1	1	0	0	0	1	0	0	0	0	0	0
Pseudoalteromonas	elyakovii	SM1926	GCF_007786285.1	SAMN12260205	Surface seawater	Environmental	1	2	NZ_VNFG01000001.1	627077	653989	26912	No	100	60	1	1	2	1	1	1	1	1	1	1	1	1	1	0	1	1	2	1	1	1	0	0	0
Pseudoalteromonas	flavipulchra	JG1	GCF_000259115.1	SAMN02470762	Rearing water of Scophthalmus maximus, China	Environmental	1	2	NZ_JH650741.1	398375	423810	25435	No	100	20	1	1	1	1	1	1	1	1	1	1	1	1	1	0	0	0	2	0	0	1	0	0	0
Pseudoalteromonas	flavipulchra	LMG 20361	GCF_014596995.1	SAMN12618900	Surface seawater, France	Environmental	1	2	NZ_VSSD01000004.1	47523	73016	25493	No	100	20	1	1	1	1	1	1	1	1	1	1	1	1	1	0	0	0	2	0	0	1	0	0	0
Pseudoalteromonas	flavipulchra	NCIMB 2033	GCF_014858715.1	SAMN03380237	Seawater, France	Environmental	1	2	NZ_AQGY01000005.1	351739	377232	25493	No	100	20	1	1	1	1	1	1	1	1	1	1	1	1	1	0	0	0	2	0	0	1	0	0	0
Pseudoalteromonas	flavipulchra	S1925	GCF_005886245.1	SAMN08093536	Copepod, Indian Ocean	Host	1	2	NZ_PNEK01000025.1	42890	68297	25407	No	100	20	1	1	1	1	1	1	1	1	1	1	1	1	1	0	0	0	2	0	0	1	0	0	0
Pseudoalteromonas	haloplanktis	ATCC14393	GCF_000238355.1	SAMN02470924	Marine	Environmental	1	2	NZ_AHCA01000001.1	925490	954214	28724	No	100	20	1	1	1	1	1	1	1	1	2	1	1	1	1	1	0	0	0	0	0	1	0	0	0
Pseudoalteromonas	luteoviolacea	HI1	GCF_000814765.1	SAMN02947394	Marine biofilm, Hawaii, USA	Environmental	1	2	NZ_JWIC01000007.1	659814	686710	26896	No	100	20	1	1	1	1	1	1	1	1	2	1	1	1	1	0	0	0	2	0	0	1	0	0	0
Pseudoalteromonas	piscicida	ATCC 15057	GCF_000382005.1	SAMN02440494	Red tide seawater	Environmental	1	2	NZ_KB907393.1	71511	96865	25354	No	100	20	1	1	1	1	1	1	1	1	1	1	1	1	1	0	0	0	2	0	0	1	0	0	0
Pseudoalteromonas	piscicida	DE2-B	GCF_002208135.1	SAMN06333962	Surface seawater, Cape May, USA	Environmental	1	2	NZ_CP021646.1	1694337	1721611	27274	No	100	20	2	1	1	1	1	1	1	1	2	1	1	1	1	0	0	0	2	0	0	1	0	0	0
Pseudoalteromonas	piscicida	JCM 20779	GCF_000238315.3	SAMN02470929	Red tide water, Florida, USA	Environmental	1	2	NZ_CP011924.1	1076108	1101462	25354	No	100	20	1	1	1	1	1	1	1	1	1	1	1	1	1	0	0	0	2	0	0	1	0	0	0
Pseudoalteromonas	piscicida	S2040	GCF_000967555.1	SAMN03323931	Copepod, Indian Ocean	Host	1	2	NZ_JXXW01000021.1	1405	26812	25407	No	100	20	1	1	1	1	1	1	1	1	1	1	1	1	1	0	0	0	2	0	0	1	0	0	0
Pseudoalteromonas	piscicida	S2724	GCF_000967575.1	SAMN03323934	Wood, Solomon Islands	Environmental	1	2	NZ_JXXX01000042.1	4255	29748	25493	No	100	20	1	1	1	1	1	1	1	1	1	1	1	1	1	0	0	0	2	0	0	1	0	0	0
Pseudoalteromonas	piscicida	S2724	GCF_000967575.1	SAMN03323934	Wood, Solomon Islands	Environmental	2	5	NZ_JXXX01000056.1	23018	48551	25533	No	100	10	1	1	2	1	1	1	1	1	1	1	1	1	1	0	0	0	1	0	0	0	0	0	0
Pseudoalteromonas	rubra	OCN096	GCA_001188445.1	SAMN03839337	Coral mucus of Montipora capitata, Hawaii, USA	Host	0	NA	NA	NA	NA	NA	NA	NA	NA	NA	NA	NA	NA	NA	NA	NA	NA	NA	NA	NA	NA	NA	NA	NA	NA	NA	NA	NA	NA	NA	NA	NA
Pseudoalteromonas	sp	JC28	GCA_013319255.1	SAMN09632763	Egg jelly coat of Euprymna scolopes, Hawaii	Host	1	2	c_000000000001	739705	765232	25527	No	100	20	1	1	1	1	1	1	1	1	1	1	1	1	1	0	0	0	2	0	0	1	0	0	0
Pseudoalteromonas	tunicata	D2	GCF_000153245.1	SAMN00622973	Ciona intestinalis, Sweden	Host	1	2	NZ_AAOH01000001.1	512561	534727	22166	No	84.6154	10	0	1	3	2	1	1	1	0	1	1	1	1	1	1	0	0	0	0	0	0	0	0	0
Pseudoalteromonas	ulvae	TC14	GCF_002156545.1	SAMN06344515	Marine biofilm, Toulon bay, France	Environmental	1	2	NZ_MWPV01000002.1	367315	393217	25902	No	84.6154	10	0	1	3	2	1	1	1	0	2	1	1	1	1	1	0	0	0	0	0	0	0	0	0
Pseudomonas	putida	KT2440	GCF_000007565.2	SAMN02603999	Soil	Environmental	1	4b	NC_002947.4	2984256	3007040	22784	No	92.3077	20	1	1	1	1	1	1	1	0	1	1	1	1	1	0	1	0	1	0	0	0	0	0	0
Pseudomonas	putida	KT2440	GCF_000007565.2	SAMN02603999	Soil	Environmental	2	1	NC_002947.4	3476880	3515490	38610	No	100	20	1	1	1	1	1	1	1	1	3	1	1	1	2	0	0	0	1	0	0	1	0	0	0
Pseudomonas	putida	KT2440	GCF_000007565.2	SAMN02603999	Soil	Environmental	3	1	NC_002947.4	4596182	4618222	22040	No	92.3077	10	1	1	1	1	1	1	1	0	2	1	1	1	1	0	0	0	1	0	0	0	0	0	0
Pseudomonas	aeruginosa	PAO1	GCF_013001005.1	SAMN14421669	Homo sapiens	Host	1	1	NZ_CP053028.1	87000	121324	34324	No	100	70	1	1	1	1	1	1	1	1	2	1	1	1	1	1	1	1	1	1	1	1	0	0	0
Pseudomonas	aeruginosa	PAO1	GCF_013001005.1	SAMN14421669	Homo sapiens	Host	2	4a	NZ_CP053028.1	2889618	2908696	19078	No	92.3077	0	1	1	1	1	1	1	1	1	1	0	1	1	1	0	0	0	0	0	0	0	0	0	0
Pseudomonas	aeruginosa	PAO1	GCF_013001005.1	SAMN14421669	Homo sapiens	Host	3	3	NZ_CP053028.1	3691513	3712202	20689	No	84.6154	20	1	1	1	0	1	1	1	1	0	1	1	1	1	0	1	0	0	1	0	0	0	0	0
Rhizobium	leguminosarum bv. viciae	3841	GCF_000009265.1	SAMEA1705944	Pisum sativum (root nodule)	Host	1	5	NC_008378.1	496311	525162	28851	No	92.3077	50	1	1	2	1	1	1	1	1	1	0	1	1	1	1	1	1	0	1	0	1	0	0	0
Ruegeria	arenilitoris	CECT8715	GCA_900185035.1	SAMEA104102142	Marine sand, South Korea	Environmental	0	NA	NA	NA	NA	NA	NA	NA	NA	NA	NA	NA	NA	NA	NA	NA	NA	NA	NA	NA	NA	NA	NA	NA	NA	NA	NA	NA	NA	NA	NA	NA
Ruegeria	atlantica	CECT4292	GCA_001458195.1	SAMEA3528420	Marine sediment, Atlantic Ocean	Environmental	0	NA	NA	NA	NA	NA	NA	NA	NA	NA	NA	NA	NA	NA	NA	NA	NA	NA	NA	NA	NA	NA	NA	NA	NA	NA	NA	NA	NA	NA	NA	NA
Ruegeria	atlantica	CECT4293	GCA_001458095.1	SAMEA3522225	Marine sediment, Atlantic Ocean	Environmental	0	NA	NA	NA	NA	NA	NA	NA	NA	NA	NA	NA	NA	NA	NA	NA	NA	NA	NA	NA	NA	NA	NA	NA	NA	NA	NA	NA	NA	NA	NA	NA
Ruegeria	conchae	DSM29317	GCA_003664205.1	SAMN07620991	Scapharca broughtonii, South Korea	Host	1	3	NZ_RCCT01000009.1	29720	71660	41940	No	92.3077	60	1	1	3	1	1	1	1	1	1	0	1	3	1	0	1	1	1	1	1	1	0	0	0
Ruegeria	conchae	TW15	GCA_000192475.2	SAMN02470214	Scapharca broughtonii, South Korea	Host	1	3	NZ_AEYW01000024.1	29737	71677	41940	No	92.3077	60	1	1	3	1	1	1	1	1	1	0	1	3	1	0	1	1	1	1	1	1	0	0	0
Ruegeria	denitrificans	CECT5091	GCA_001458295.1	SAMEA3542132	Oyster, Mediterranean Sea	Host	0	NA	NA	NA	NA	NA	NA	NA	NA	NA	NA	NA	NA	NA	NA	NA	NA	NA	NA	NA	NA	NA	NA	NA	NA	NA	NA	NA	NA	NA	NA	NA
Ruegeria	faecimaris	DSM28009	GCA_900182615.1	SAMN06265380	Sediment from tidal flat, South Korea	Environmental	0	NA	NA	NA	NA	NA	NA	NA	NA	NA	NA	NA	NA	NA	NA	NA	NA	NA	NA	NA	NA	NA	NA	NA	NA	NA	NA	NA	NA	NA	NA	NA
Ruegeria	halocynthiae	MOLA_R1-13b	GCA_000743705.1	SAMN02997979	Crambe crambe sponge, France	Host	0	NA	NA	NA	NA	NA	NA	NA	NA	NA	NA	NA	NA	NA	NA	NA	NA	NA	NA	NA	NA	NA	NA	NA	NA	NA	NA	NA	NA	NA	NA	NA
Ruegeria	halocynthiae		GCA_900106805.1	SAMN05444358	Halocynthia roretzi, South Korea	Host	0	NA	NA	NA	NA	NA	NA	NA	NA	NA	NA	NA	NA	NA	NA	NA	NA	NA	NA	NA	NA	NA	NA	NA	NA	NA	NA	NA	NA	NA	NA	NA
Ruegeria	intermedia	DSM29341	GCA_900129345.1	SAMN05444279	Coastel hot spring, Green Island	Environmental	0	NA	NA	NA	NA	NA	NA	NA	NA	NA	NA	NA	NA	NA	NA	NA	NA	NA	NA	NA	NA	NA	NA	NA	NA	NA	NA	NA	NA	NA	NA	NA
Ruegeria	kandeliae	J95	GCA_003116585.1	SAMN08992099	Soil of Kandelia candel, China	Environmental	1	3	NZ_QEHM01000003.1	166733	207270	40537	No	92.3077	60	1	1	3	2	1	1	1	1	1	0	1	2	1	0	1	1	1	1	1	1	0	0	0
Ruegeria	lacuscaerulensis	ITI-1157	GCA_000161775.1	SAMN02436218	Water, Blue Lagoon, Iceland	Environmental	0	NA	NA	NA	NA	NA	NA	NA	NA	NA	NA	NA	NA	NA	NA	NA	NA	NA	NA	NA	NA	NA	NA	NA	NA	NA	NA	NA	NA	NA	NA	NA
Ruegeria	litorea	R37_CECT7639	GCA_900172225.1	SAMEA103892645	Surface seawater, Spain	Environmental	0	NA	NA	NA	NA	NA	NA	NA	NA	NA	NA	NA	NA	NA	NA	NA	NA	NA	NA	NA	NA	NA	NA	NA	NA	NA	NA	NA	NA	NA	NA	NA
Ruegeria	marina	CGMCC1_9108	GCA_900101475.1	SAMN04488239	Marine sediment, East China Sea	Environmental	1	3	NZ_FMZV01000019.1	34174	71841	37667	No	100	50	1	1	1	1	1	1	1	1	2	1	1	2	2	1	1	0	0	1	1	1	0	0	0
Ruegeria	marisrubri	ZGT118	GCA_001507595.1	SAMN04376034	Brine-seawater interface, Saudi Arabia	Environmental	0	NA	NA	NA	NA	NA	NA	NA	NA	NA	NA	NA	NA	NA	NA	NA	NA	NA	NA	NA	NA	NA	NA	NA	NA	NA	NA	NA	NA	NA	NA	NA
Ruegeria	mediterranea	M17_CECT7615	GCA_900302455.1	SAMEA104614313	Surface seawater, Malvarrosa, Spain	Environmental	0	NA	NA	NA	NA	NA	NA	NA	NA	NA	NA	NA	NA	NA	NA	NA	NA	NA	NA	NA	NA	NA	NA	NA	NA	NA	NA	NA	NA	NA	NA	NA
Ruegeria	meonggei	CECT8411	GCA_900172215.1	SAMEA102343918	Halocyntia roretzi, South Korea	Host	0	NA	NA	NA	NA	NA	NA	NA	NA	NA	NA	NA	NA	NA	NA	NA	NA	NA	NA	NA	NA	NA	NA	NA	NA	NA	NA	NA	NA	NA	NA	NA
Ruegeria	pomeroyi	DSS-3	GCA_000011965.2	SAMN02604003	Sea water, Southeastern US coastal waters	Environmental	0	NA	NA	NA	NA	NA	NA	NA	NA	NA	NA	NA	NA	NA	NA	NA	NA	NA	NA	NA	NA	NA	NA	NA	NA	NA	NA	NA	NA	NA	NA	NA
Ruegeria	profundi	ZGT108	GCA_001507545.1	SAMN04376033	Brine-seawater interface, Saudi Arabia	Environmental	0	NA	NA	NA	NA	NA	NA	NA	NA	NA	NA	NA	NA	NA	NA	NA	NA	NA	NA	NA	NA	NA	NA	NA	NA	NA	NA	NA	NA	NA	NA	NA
Ruegeria	sp	318-1	GCA_004358185.1	SAMN11098708	Marine sediment, South Korea	Environmental	1	3	NZ_SMUV01000029.1	2057	12784	10727	No	61.5385	10	1	1	1	1	1	1	1	1	0	0	0	0	0	0	0	1	0	0	0	0	0	0	0
Ruegeria	sp	6PALISEP08	GCA_001238295.1	SAMN03891582	Surface seawater, Spain	Environmental	0	NA	NA	NA	NA	NA	NA	NA	NA	NA	NA	NA	NA	NA	NA	NA	NA	NA	NA	NA	NA	NA	NA	NA	NA	NA	NA	NA	NA	NA	NA	NA
Ruegeria	sp	A3M17	GCA_003318255.1	SAMN09522134	Coastal surface sea water, Massachusetts, USA	Environmental	0	NA	NA	NA	NA	NA	NA	NA	NA	NA	NA	NA	NA	NA	NA	NA	NA	NA	NA	NA	NA	NA	NA	NA	NA	NA	NA	NA	NA	NA	NA	NA
Ruegeria	sp	AD91A	GCA_003443535.1	SAMN09780824	Pure culture marine broth	Environmental	0	NA	NA	NA	NA	NA	NA	NA	NA	NA	NA	NA	NA	NA	NA	NA	NA	NA	NA	NA	NA	NA	NA	NA	NA	NA	NA	NA	NA	NA	NA	NA
Ruegeria	sp	Alg231-54	GCA_900143525.1	SAMEA19234918	Marine sponge, Portugal	Host	0	NA	NA	NA	NA	NA	NA	NA	NA	NA	NA	NA	NA	NA	NA	NA	NA	NA	NA	NA	NA	NA	NA	NA	NA	NA	NA	NA	NA	NA	NA	NA
Ruegeria	sp	ANG-R	GCA_000813985.1	SAMN03246066	Accessory nidamental gland of Euprymna scolopes, Hawaii	Host	0	NA	NA	NA	NA	NA	NA	NA	NA	NA	NA	NA	NA	NA	NA	NA	NA	NA	NA	NA	NA	NA	NA	NA	NA	NA	NA	NA	NA	NA	NA	NA
Ruegeria	sp	ANG-S4	GCA_000814005.1	SAMN03246067	Accessory nidamental gland of Euprymna scolopes, Hawaii	Host	1	3	NZ_JWLK01000002.1	88052	132816	44764	No	92.3077	60	1	1	3	1	1	1	1	1	1	0	1	3	1	0	1	1	1	1	1	1	0	0	0
Ruegeria	sp	AU67	GCA_900312795.1	SAMEA104674443	Sponge associated	Host	0	NA	NA	NA	NA	NA	NA	NA	NA	NA	NA	NA	NA	NA	NA	NA	NA	NA	NA	NA	NA	NA	NA	NA	NA	NA	NA	NA	NA	NA	NA	NA
Ruegeria	sp	CAU1488	GCA_005938215.1	SAMN11860882	Tidal flat, South Korea	Environmental	0	NA	NA	NA	NA	NA	NA	NA	NA	NA	NA	NA	NA	NA	NA	NA	NA	NA	NA	NA	NA	NA	NA	NA	NA	NA	NA	NA	NA	NA	NA	NA
Ruegeria	sp	EL01	GCA_900313035.1	SAMEA104692609	Eunicella labiata, Portugal	Host	0	NA	NA	NA	NA	NA	NA	NA	NA	NA	NA	NA	NA	NA	NA	NA	NA	NA	NA	NA	NA	NA	NA	NA	NA	NA	NA	NA	NA	NA	NA	NA
Ruegeria	sp	PrR005	GCA_010500245.1	SAMN14001049	Sediment, Guangdong, China	Environmental	1	3	NZ_JAAGOX010000015.1	26924	63937	37013	No	100	40	1	1	1	1	1	1	1	1	1	1	1	2	3	1	1	0	0	1	1	0	0	0	0
Ruegeria	sp	THAF33	GCA_009363615.1	SAMN11996118	Surface of microplastic particle in marine aquarium, Germany	Environmental	0	NA	NA	NA	NA	NA	NA	NA	NA	NA	NA	NA	NA	NA	NA	NA	NA	NA	NA	NA	NA	NA	NA	NA	NA	NA	NA	NA	NA	NA	NA	NA
Ruegeria	sp	TM1040	GCA_000014065.1	SAMN02598292	bacterial community associated with laboratory cultures of four 'Pfiesteria-like' dinoflagellates	Host	0	NA	NA	NA	NA	NA	NA	NA	NA	NA	NA	NA	NA	NA	NA	NA	NA	NA	NA	NA	NA	NA	NA	NA	NA	NA	NA	NA	NA	NA	NA	NA
Salmonella	enterica subsp. enterica serovar Typhimurium	SR11	AJ320483.1	NA	Gallus gallus	Host	1	3	NA	NA	NA	37866	NA	100	0	1	1	1	2	1	1	1	1	1	1	1	1	1	0	0	0	0	0	0	0	0	0	0
Serratia	marcescens	FGI94	GCF_000330865.1	SAMN02604288	Ant fungal garden	Host	1	2	NC_020064.1	1764726	1796753	32027	No	100	10	2	1	1	1	1	1	1	1	1	1	1	2	1	0	0	0	1	0	0	0	0	0	0
Serratia	marcescens	FGI94	GCF_000330865.1	SAMN02604288	Ant fungal garden	Host	2	3	NC_020064.1	2910344	2957874	47530	No	100	60	1	1	1	1	1	1	1	1	2	1	1	2	1	0	1	1	1	1	1	1	0	0	0
Tateyamaria	omphalii	DOK1-4	GCA_001969365.1	SAMN06234538	Seawater, South Korea	Environmental	1	5	NZ_CP019312.1	2042773	2063824	21051	No	84.6154	20	1	1	2	1	1	1	1	1	0	0	1	1	1	0	0	1	0	0	0	1	0	0	0
Tateyamaria	omphalii	DP5N21-5	GCA_019802125.1	SAMN19953142	Offshore sea sediment, Shenzen, China	Environmental	1	5	JAHVHT010000001.1	582786	607832	25046	No	84.6154	30	1	1	2	1	1	1	1	1	0	0	1	1	1	1	0	1	0	0	0	1	0	0	0
Tateyamaria	omphalii	KCTC12333	GCA_014651375.1	SAMD00245561	Omphalius pfeifferi pfeifferi, Japan	Host	0	NA	NA	NA	NA	NA	NA	NA	NA	NA	NA	NA	NA	NA	NA	NA	NA	NA	NA	NA	NA	NA	NA	NA	NA	NA	NA	NA	NA	NA	NA	NA
Tateyamaria	pelophila	DSM17270	GCA_019966495.1	SAMN20953795	Tidal flat sediment, North Sea	Environmental	0	NA	NA	NA	NA	NA	NA	NA	NA	NA	NA	NA	NA	NA	NA	NA	NA	NA	NA	NA	NA	NA	NA	NA	NA	NA	NA	NA	NA	NA	NA	NA
Tateyamaria	sp	0.2_20180522_Bin_MAXBIN_086_sub_1	GCA_905480645.1	SAMEA8498504	Coastal seawater, North Sea (metagenome assembled)	Environmental	0	NA	NA	NA	NA	NA	NA	NA	NA	NA	NA	NA	NA	NA	NA	NA	NA	NA	NA	NA	NA	NA	NA	NA	NA	NA	NA	NA	NA	NA	NA	NA
Tateyamaria	sp	Alg231-49	GCA_900143535.1	SAMEA19236418	Marine sponge, Portugal	Host	1	3	NZ_FRFA01000013.1	6476	39412	32936	No	92.3077	50	1	1	3	1	1	1	1	1	1	0	1	1	1	0	2	1	1	0	1	1	0	0	0
Tateyamaria	sp	ANG-S1	GCA_000814025.1	SAMN03246068	Accessory nidamental gland of Euprymna scolopes, Hawaii	Host	1	3	NZ_JWLL01000013.1	1985	33520	31535	No	92.3077	40	1	1	3	1	1	1	1	1	1	0	1	1	1	0	2	1	1	0	0	1	0	0	0
Tateyamaria	sp	ANG-S1	GCA_000814025.1	SAMN03246068	Accessory nidamental gland of Euprymna scolopes, Hawaii	Host	2	5	NZ_JWLL01000010.1	75629	96687	21058	No	84.6154	20	1	1	2	1	1	1	1	1	0	0	1	1	1	0	0	1	0	0	0	1	0	0	0
Tateyamaria	sp	HE327_NSB063	GCA_018607915.1	SAMN14593189	Sea water from phytoplankton bloom, North Sea	Environmental	0	NA	NA	NA	NA	NA	NA	NA	NA	NA	NA	NA	NA	NA	NA	NA	NA	NA	NA	NA	NA	NA	NA	NA	NA	NA	NA	NA	NA	NA	NA	NA
Tateyamaria	sp	SI034_bin61	GCA_018676075.1	SAMN14913881	Hypoxic seawater, Vancouver, Canada (metagenome assembled)	Environmental	0	NA	NA	NA	NA	NA	NA	NA	NA	NA	NA	NA	NA	NA	NA	NA	NA	NA	NA	NA	NA	NA	NA	NA	NA	NA	NA	NA	NA	NA	NA	NA
Tateyamaria	sp	SI037_bin200	GCA_018672095.1	SAMN14914127	Hypoxic seawater, Vancouver, Canada (metagenome assembled)	Environmental	0	NA	NA	NA	NA	NA	NA	NA	NA	NA	NA	NA	NA	NA	NA	NA	NA	NA	NA	NA	NA	NA	NA	NA	NA	NA	NA	NA	NA	NA	NA	NA
Tateyamaria	sp	SI072_bin31	GCA_018668195.1	SAMN14915180	Hypoxic seawater, Vancouver, Canada (metagenome assembled)	Environmental	0	NA	NA	NA	NA	NA	NA	NA	NA	NA	NA	NA	NA	NA	NA	NA	NA	NA	NA	NA	NA	NA	NA	NA	NA	NA	NA	NA	NA	NA	NA	NA
Tateyamaria	sp	SI072_bin9	GCA_018701145.1	SAMN14915244	Hypoxic seawater, Vancouver, Canada (metagenome assembled)	Environmental	0	NA	NA	NA	NA	NA	NA	NA	NA	NA	NA	NA	NA	NA	NA	NA	NA	NA	NA	NA	NA	NA	NA	NA	NA	NA	NA	NA	NA	NA	NA	NA
Tateyamaria	sp	SI073_bin148	GCA_018702795.1	SAMN14915309	Hypoxic seawater, Vancouver, Canada (metagenome assembled)	Environmental	0	NA	NA	NA	NA	NA	NA	NA	NA	NA	NA	NA	NA	NA	NA	NA	NA	NA	NA	NA	NA	NA	NA	NA	NA	NA	NA	NA	NA	NA	NA	NA
Tateyamaria	sp	SI074_bin131	GCA_018662565.1	SAMN14915491	Hypoxic seawater, Vancouver, Canada (metagenome assembled)	Environmental	0	NA	NA	NA	NA	NA	NA	NA	NA	NA	NA	NA	NA	NA	NA	NA	NA	NA	NA	NA	NA	NA	NA	NA	NA	NA	NA	NA	NA	NA	NA	NA
Tateyamaria	sp	SI075_bin122	GCA_018659745.1	SAMN14915649	Hypoxic seawater, Vancouver, Canada (metagenome assembled)	Environmental	0	NA	NA	NA	NA	NA	NA	NA	NA	NA	NA	NA	NA	NA	NA	NA	NA	NA	NA	NA	NA	NA	NA	NA	NA	NA	NA	NA	NA	NA	NA	NA
Tateyamaria	sp	syn59	GCA_007995245.1	SAMN11607868	Seawater, China	Environmental	1	5	NZ_VCBA01000004.1	2130	23188	21058	No	84.6154	20	1	1	2	1	1	1	1	1	0	0	1	1	1	0	0	1	0	0	0	1	0	0	0
Vibrio	alginolyticus	EPJS	FJ790777.1	NA	Fish pathogen	Host	1	1	NA	NA	NA	29402	NA	100	0	2	1	1	1	1	2	2	1	1	1	1	1	1	0	0	0	0	0	0	0	0	0	0
Vibrio	alginolyticus	EPJS	FJ790777.1	NA	Fish pathogen	Host	2	5	NA	NA	NA	22094	NA	100	0	1	1	2	1	1	1	2	1	2	2	1	1	1	0	0	0	0	0	0	0	0	0	0
Vibrio	campbellii	ABR2-13	GCA_002954505.1	SAMN06133339	Seawater, Japan	Environmental	1	1	NZ_MSCE01000002.1	872816	910418	37602	No	100	30	2	1	1	1	1	1	1	1	1	1	1	2	1	1	1	0	0	1	0	0	0	0	0
Vibrio	campbellii	ABR2-13	GCA_002954505.1	SAMN06133339	Seawater, Japan	Environmental	2	5	NZ_MSCE01000002.1	978669	1004707	26038	No	100	60	1	1	2	1	1	1	1	1	2	1	1	1	1	0	1	1	2	1	1	1	0	0	0
Vibrio	campbellii	KNH1	GCA_021397475.1	SAMN24593137	Seawater, Hawaii, USA	Environmental	1	5	NZ_JAJVEK010000013	39649	65686	26037	No	100	60	1	1	2	1	1	1	1	1	1	1	1	1	1	0	1	1	2	1	1	1	0	0	0
Vibrio	campbellii	KNH1	GCA_021397475.1	SAMN24593137	Seawater, Hawaii, USA	Environmental	2	1	NZ_JAJVEK010000013	116028	153441	37413	No	100	30	2	1	1	1	1	1	1	1	1	1	1	2	1	1	1	0	0	1	0	0	0	0	0
Vibrio	cholerae	V52	GCF_001857545.1	SAMN05590436	Homo sapiens	Host	1	1	NZ_MIPN01000011.1	93295	118773	25478	No	92.3077	30	2	1	1	0	1	1	1	1	1	1	1	1	1	0	1	0	1	0	0	0	0	0	1
Vibrio	cholerae O1 bv. El Tor	N16961	GCF_900205735.1	SAMEA104223503	Environmental, Bangladesh	Environmental	1	1	NZ_LT906615.1	115140	140632	25492	No	92.3077	30	2	1	1	0	1	1	1	1	1	1	1	1	1	0	1	0	1	0	0	0	0	0	1
Vibrio	fischeri	5F146	GCF_001691015.1	SAMN04867936	Filtered Seawater, 5-63 micron fraction; Massachusetts	Environmental	1	1	NZ_MAJR01000118.1	279906	300170	20264	No	84.6154	30	1	1	1	0	1	1	1	1	0	1	1	1	1	0	1	0	0	1	1	0	0	0	0
Vibrio	fischeri	5F23	GCF_001690975.1	SAMN04867937	Filtered Seawater, 5-63 micron fraction; Massachusetts	Environmental	1	1	NZ_MAJQ01000002.1	72913	93177	20264	No	84.6154	30	1	1	1	0	1	1	1	1	0	1	1	1	1	0	1	0	0	1	1	0	0	0	0
Vibrio	fischeri	5F306	GCF_001690945.1	SAMN04867938	Filtered Seawater, 5-63 micron fraction; Massachusetts	Environmental	1	1	NZ_MAJP01000001.1	69031	89295	20264	No	84.6154	30	1	1	1	0	1	1	1	1	0	1	1	1	1	0	1	0	0	1	1	0	0	0	0
Vibrio	fischeri	5F306	GCF_001690945.1	SAMN04867938	Filtered Seawater, 5-63 micron fraction; Massachusetts	Environmental	2	1	NZ_MAJP01000026.1	198780	260226	61446	No	100	60	2	1	1	1	1	1	1	1	1	1	1	1	1	1	1	0	0	1	0	0	1	1	1
Vibrio	fischeri	5F33	GCF_001690925.1	SAMN04867939	Filtered Seawater, 5-63 micron fraction; Massachusetts	Environmental	1	1	NZ_MAJO01000007.1	104340	124604	20264	No	84.6154	30	1	1	1	0	1	1	1	1	0	1	1	1	1	0	1	0	0	1	1	0	0	0	0
Vibrio	fischeri	5F7	GCF_001730155.1	SAMN05449651	Filtered Seawater, 5-63 micron fraction; Massachusetts	Environmental	1	1	NZ_MCGJ01000076.1	226726	246990	20264	No	84.6154	30	1	1	1	0	1	1	1	1	0	1	1	1	1	0	1	0	0	1	1	0	0	0	0
Vibrio	fischeri	5F97	GCF_001690915.1	SAMN04867940	Filtered Seawater, 5-63 micron fraction; USA:Massachusetts	Environmental	1	1	NZ_MAJN01000023.1	630304	650568	20264	No	84.6154	30	1	1	1	0	1	1	1	1	0	1	1	1	1	0	1	0	0	1	1	0	0	0	0
Vibrio	fischeri	5F97	GCF_001690915.1	SAMN04867940	Filtered Seawater, 5-63 micron fraction; USA:Massachusetts	Environmental	2	1	NZ_MAJN01000045.1	110410	172542	62132	No	100	60	2	1	1	1	1	1	1	1	1	1	1	1	1	1	1	0	0	1	0	0	1	1	1
Vibrio	fischeri	5LC	GCF_000985635.1	SAMEA3355991	Seawater; Portugal; Lagoon; Host-associated; fish; mimarks survey	Host	1	1	NZ_CVOI01000002.1	259792	280056	20264	No	84.6154	30	1	1	1	0	1	1	1	1	0	1	1	1	1	0	1	0	0	1	1	0	0	0	0
Vibrio	fischeri	5LC	GCF_000985635.1	SAMEA3355991	Seawater; Portugal; Lagoon; Host-associated; fish; mimarks survey	Host	2	1	NZ_CVOI01000001.1	360901	403032	42131	No	100	60	2	1	1	1	1	1	1	1	1	1	1	1	1	1	1	0	0	1	0	0	1	1	1
Vibrio	fischeri	ATCC7744	GCF_016464335.1	SAMN16456059	Marine; cell culture	Environmental	1	1	NZ_JADCNP010000002.1	57625	77889	20264	No	84.6154	30	1	1	1	0	1	1	1	1	0	1	1	1	1	0	1	0	0	1	1	0	0	0	0
Vibrio	fischeri	ATCC7744	GCF_016464335.1	SAMN16456059	Marine; cell culture	Environmental	2	1	NZ_JADCNP010000012.1	52990	95861	42871	Yes, end of contig	100	50	2	1	1	1	1	1	1	1	1	1	1	1	1	1	1	0	0	1	0	0	1	1	0
Vibrio	fischeri	cmult.1.2	GCF_009728075.1	SAMN13340494	Coelorinchus multispinulosus; Japan: Saga Market, Kochi, Shikoku	Host	1	1	NZ_WOBY01000014.1	268249	288513	20264	No	84.6154	30	1	1	1	0	1	1	1	1	0	1	1	1	1	0	1	0	0	1	1	0	0	0	0
Vibrio	fischeri	emors.1.1	GCF_009728065.1	SAMN13340495	Euprymna morsei; Japan, Ago Bay, Honshu	Host	1	1	NZ_WOBX01000016.1	574807	595071	20264	No	84.6154	30	1	1	1	0	1	1	1	1	0	1	1	1	1	0	1	0	0	1	1	0	0	0	0
Vibrio	fischeri	emors.1.1	GCF_009728065.1	SAMN13340495	Euprymna morsei; Japan, Ago Bay, Honshu	Host	2	1	NZ_WOBX01000012.1	6518	48657	42139	Yes, beginning of contig	100	50	2	1	1	1	1	1	1	1	1	1	1	1	1	1	1	0	0	1	0	0	1	1	0
Vibrio	fischeri	emors.1.2	GCF_009728085.1	SAMN13340496	Euprymna morsei; Japan, Ago Bay, Honshu	Host	1	1	NZ_WOBW01000005.1	778261	798525	20264	No	84.6154	30	1	1	1	0	1	1	1	1	0	1	1	1	1	0	1	0	0	1	1	0	0	0	0
Vibrio	fischeri	emors.10.1	GCF_009728045.1	SAMN13340514	Euprymna morsei; Japan, Ago Bay, Honshu	Host	1	1	NZ_WOBV01000014.1	93528	113792	20264	No	84.6154	30	1	1	1	0	1	1	1	1	0	1	1	1	1	0	1	0	0	1	1	0	0	0	0
Vibrio	fischeri	emors.10.3	GCF_009728025.1	SAMN13340515	Euprymna morsei; Japan, Ago Bay, Honshu	Host	1	1	NZ_WOBU01000002.1	16817	37081	20264	No	84.6154	30	1	1	1	0	1	1	1	1	0	1	1	1	1	0	1	0	0	1	1	0	0	0	0
Vibrio	fischeri	emors.10.3	GCF_009728025.1	SAMN13340515	Euprymna morsei; Japan, Ago Bay, Honshu	Host	2	1	NZ_WOBU01000033.1	163817	205962	42145	No	100	60	2	1	1	1	1	1	1	1	1	1	1	1	1	1	1	0	0	1	0	0	1	1	1
Vibrio	fischeri	emors.11.1	GCF_009727995.1	SAMN13340516	Euprymna morsei; Japan, Ago Bay, Honshu	Host	1	1	NZ_WOBT01000016.1	37999	58263	20264	No	84.6154	30	1	1	1	0	1	1	1	1	0	1	1	1	1	0	1	0	0	1	1	0	0	0	0
Vibrio	fischeri	emors.11.1	GCF_009727995.1	SAMN13340516	Euprymna morsei; Japan, Ago Bay, Honshu	Host	2	1	NZ_WOBT01000034.1	181447	212073	30626	Yes, end of contig	84.6154	30	2	1	1	1	1	1	1	1	1	0	0	1	1	0	0	0	0	1	0	0	1	1	0
Vibrio	fischeri	emors.11.2	GCF_009727975.1	SAMN13340517	Euprymna morsei; Japan, Ago Bay, Honshu	Host	1	1	NZ_WOBS01000003.1	75886	96150	20264	No	84.6154	30	1	1	1	0	1	1	1	1	0	1	1	1	1	0	1	0	0	1	1	0	0	0	0
Vibrio	fischeri	emors.2.1	GCF_009727955.1	SAMN13340497	Euprymna morsei; Japan, Ago Bay, Honshu	Host	1	1	NZ_WOBR01000004.1	966297	986561	20264	No	84.6154	30	1	1	1	0	1	1	1	1	0	1	1	1	1	0	1	0	0	1	1	0	0	0	0
Vibrio	fischeri	emors.2.2	GCF_009727925.1	SAMN13340498	Euprymna morsei; Japan, Ago Bay, Honshu	Host	1	1	NZ_WOBQ01000002.1	313062	333326	20264	No	84.6154	30	1	1	1	0	1	1	1	1	0	1	1	1	1	0	1	0	0	1	1	0	0	0	0
Vibrio	fischeri	emors.3.1	GCF_009727945.1	SAMN13340499	Euprymna morsei; Japan, Ago Bay, Honshu	Host	1	1	NZ_WOBP01000002.1	482813	503077	20264	No	84.6154	30	1	1	1	0	1	1	1	1	0	1	1	1	1	0	1	0	0	1	1	0	0	0	0
Vibrio	fischeri	emors.3.1	GCF_009727945.1	SAMN13340499	Euprymna morsei; Japan, Ago Bay, Honshu	Host	2	1	NZ_WOBP01000003.1	515060	557199	42139	No	100	60	2	1	1	1	1	1	1	1	1	1	1	1	1	1	1	0	0	1	0	0	1	1	1
Vibrio	fischeri	emors.3.2	GCF_009727905.1	SAMN13340500	Euprymna morsei; Japan, Ago Bay, Honshu	Host	1	1	NZ_WOBO01000004.1	574874	595138	20264	No	84.6154	30	1	1	1	0	1	1	1	1	0	1	1	1	1	0	1	0	0	1	1	0	0	0	0
Vibrio	fischeri	emors.3.2	GCF_009727905.1	SAMN13340500	Euprymna morsei; Japan, Ago Bay, Honshu	Host	2	1	NZ_WOBO01000005.1	515036	557175	42139	No	100	60	2	1	1	1	1	1	1	1	1	1	1	1	1	1	1	0	0	1	0	0	1	1	1
Vibrio	fischeri	emors.4.1	GCF_009727825.1	SAMN13340501	Euprymna morsei; Japan, Ago Bay, Honshu	Host	1	1	NZ_WOBN01000010.1	97953	118217	20264	No	84.6154	30	1	1	1	0	1	1	1	1	0	1	1	1	1	0	1	0	0	1	1	0	0	0	0
Vibrio	fischeri	emors.4.1	GCF_009727825.1	SAMN13340501	Euprymna morsei; Japan, Ago Bay, Honshu	Host	2	1	NZ_WOBN01000020.1	53204	95382	42178	No	100	60	2	1	1	1	1	1	1	1	1	1	1	1	1	1	1	0	0	1	0	0	1	1	1
Vibrio	fischeri	emors.4.2	GCF_009727845.1	SAMN13340502	Euprymna morsei; Japan, Ago Bay, Honshu	Host	1	1	NZ_WOBM01000002.1	470754	491019	20265	No	84.6154	30	1	1	1	0	1	1	1	1	0	1	1	1	1	0	1	0	0	1	1	0	0	0	0
Vibrio	fischeri	emors.4.2	GCF_009727845.1	SAMN13340502	Euprymna morsei; Japan, Ago Bay, Honshu	Host	2	1	NZ_WOBM01000001.1	532430	574660	42230	No	100	60	2	1	1	1	1	1	1	1	1	1	1	1	1	1	1	0	0	1	0	0	1	1	1
Vibrio	fischeri	emors.5.1o	GCF_009727875.1	SAMN13340503	Euprymna morsei; Japan, Ago Bay, Honshu	Host	1	1	NZ_WOBL01000011.1	75434	95698	20264	No	84.6154	30	1	1	1	0	1	1	1	1	0	1	1	1	1	0	1	0	0	1	1	0	0	0	0
Vibrio	fischeri	emors.5.1t	GCF_009727835.1	SAMN13340504	Euprymna morsei; Japan, Ago Bay, Honshu	Host	1	1	NZ_WOBK01000010.1	88229	108493	20264	No	84.6154	30	1	1	1	0	1	1	1	1	0	1	1	1	1	0	1	0	0	1	1	0	0	0	0
Vibrio	fischeri	emors.5.2	GCF_009727805.1	SAMN13340505	Euprymna morsei; Japan, Ago Bay, Honshu	Host	1	1	NZ_WOBJ01000020.1	91001	111265	20264	No	84.6154	30	1	1	1	0	1	1	1	1	0	1	1	1	1	0	1	0	0	1	1	0	0	0	0
Vibrio	fischeri	emors.6.1	GCF_009727735.1	SAMN13340506	Euprymna morsei; Japan, Ago Bay, Honshu	Host	1	1	NZ_WOBI01000014.1	85787	106051	20264	No	84.6154	30	1	1	1	0	1	1	1	2	0	1	1	1	1	0	1	0	0	1	1	0	0	0	0
Vibrio	fischeri	emors.6.2	GCF_009727745.1	SAMN13340507	Euprymna morsei; Japan, Ago Bay, Honshu	Host	1	1	NZ_WOBH01000007.1	728599	748863	20264	No	84.6154	30	1	1	1	0	1	1	1	2	0	1	1	1	1	0	1	0	0	1	1	0	0	0	0
Vibrio	fischeri	emors.7.1	GCF_009727755.1	SAMN13340508	Euprymna morsei; Japan, Ago Bay, Honshu	Host	1	1	NZ_WOBG01000017.1	673169	693433	20264	No	84.6154	30	1	1	1	0	1	1	1	1	0	1	1	1	1	0	1	0	0	1	1	0	0	0	0
Vibrio	fischeri	emors.7.1	GCF_009727755.1	SAMN13340508	Euprymna morsei; Japan, Ago Bay, Honshu	Host	2	1	NZ_WOBG01000007.1	255707	317335	61628	No	100	60	2	1	1	1	1	1	1	1	1	1	1	1	1	1	1	0	0	1	0	0	1	1	1
Vibrio	fischeri	emors.7.2	GCF_009727725.1	SAMN13340509	Euprymna morsei; Japan, Ago Bay, Honshu	Host	1	1	NZ_WOBF01000017.1	3693	23952	20259	No	84.6154	30	1	1	1	0	1	1	1	1	0	1	1	1	1	0	1	0	0	1	1	0	0	0	0
Vibrio	fischeri	emors.7.2	GCF_009727725.1	SAMN13340509	Euprymna morsei; Japan, Ago Bay, Honshu	Host	2	1	NZ_WOBF01000003.1	52801	134916	82115	No	100	60	2	1	1	1	1	1	1	1	1	1	1	1	1	1	1	0	0	1	0	0	1	1	1
Vibrio	fischeri	emors.8.2	GCF_009727705.1	SAMN13340510	Euprymna morsei; Japan, Ago Bay, Honshu	Host	1	1	NZ_WOBE01000038.1	186682	206946	20264	No	84.6154	30	1	1	1	0	1	1	1	1	0	1	1	1	1	0	1	0	0	1	1	0	0	0	0
Vibrio	fischeri	emors.8.2	GCF_009727705.1	SAMN13340510	Euprymna morsei; Japan, Ago Bay, Honshu	Host	2	1	NZ_WOBE01000036.1	105841	147986	42145	No	100	60	2	1	1	1	1	1	1	1	1	1	1	1	1	1	1	0	0	1	0	0	1	1	1
Vibrio	fischeri	emors.8.7	GCF_009727685.1	SAMN13340511	Euprymna morsei; Japan, Ago Bay, Honshu	Host	1	1	NZ_WOBD01000004.1	449176	469440	20264	No	84.6154	30	1	1	1	0	1	1	1	1	0	1	1	1	1	0	1	0	0	1	1	0	0	0	0
Vibrio	fischeri	emors.8.7	GCF_009727685.1	SAMN13340511	Euprymna morsei; Japan, Ago Bay, Honshu	Host	2	1	NZ_WOBD01000008.1	24987	69472	44485	No	100	60	2	1	1	1	1	1	1	1	1	1	1	1	1	1	1	0	0	1	0	0	1	1	1
Vibrio	fischeri	emors.9.1	GCF_009727605.1	SAMN13340512	Euprymna morsei; Japan, Ago Bay, Honshu	Host	1	1	NZ_WOBC01000006.1	473775	494040	20265	No	84.6154	30	1	1	1	0	1	1	1	1	0	1	1	1	1	0	1	0	0	1	1	0	0	0	0
Vibrio	fischeri	emors.9.1	GCF_009727605.1	SAMN13340512	Euprymna morsei; Japan, Ago Bay, Honshu	Host	2	1	NZ_WOBC01000029.1	92636	155349	62713	No	100	60	2	1	1	1	1	1	1	1	1	1	1	1	1	1	1	0	0	1	0	0	1	1	1
Vibrio	fischeri	emors.9.2	GCF_009727645.1	SAMN13340513	Euprymna morsei; Japan, Ago Bay, Honshu	Host	1	1	NZ_WOBB01000011.1	281600	301864	20264	No	84.6154	30	1	1	1	0	1	1	1	1	0	1	1	1	1	0	1	0	0	1	1	0	0	0	0
Vibrio	fischeri	ES114	GCF_000011805.1	SAMN02604303	Euprymna scolopes	Host	1	1	NC_006840.2	1090978	1111242	20264	No	84.6154	30	1	1	1	0	1	1	1	1	0	1	1	1	1	0	1	0	0	1	1	0	0	0	0
Vibrio	fischeri	ES213	GCF_001640315.1	SAMN04486005	Squid, Hawaii	Host	1	1	NZ_LTYU01000001.1	44992	65256	20264	No	84.6154	30	1	1	1	0	1	1	1	1	0	1	1	1	1	0	1	0	0	1	1	0	0	0	0
Vibrio	fischeri	ES213	GCF_001640315.1	SAMN04486005	Squid, Hawaii	Host	2	1	NZ_LTYU01000025.1	160096	190835	30739	Yes, end of contig	100	50	2	1	1	1	1	1	1	1	1	1	1	1	1	1	1	0	0	1	0	0	1	1	0
Vibrio	fischeri	ES401	GCF_004685055.1	SAMN11099797	Euprymna scolopes	Host	1	1	NZ_SRJG01000002.1	748962	769244	20282	No	84.6154	30	1	1	1	0	1	1	1	1	0	1	1	1	1	0	1	0	0	1	1	0	0	0	0
Vibrio	fischeri	ES401	GCF_004685055.1	SAMN11099797	Euprymna scolopes	Host	2	1	NZ_SRJG01000005.1	343596	392876	49280	No	100	60	2	1	1	1	1	1	1	1	1	1	1	2	1	2	1	0	0	1	0	0	1	1	1
Vibrio	fischeri	ESF436_3	GCF_021394735.1	SAMN24593131	Euprymna scolopes (This study)	Host	1	1	NZ_JAJVEE010000001	261740	282004	20264	No	84.6154	30	1	1	1	0	1	1	1	1	0	1	1	1	1	0	1	0	0	1	1	0	0	0	0
Vibrio	fischeri	ESF436_4	GCF_021394775.1	SAMN24593132	Euprymna scolopes (This study)	Host	1	1	NZ_JAJVEF010000001	261729	281993	20264	No	84.6154	30	1	1	1	0	1	1	1	1	0	1	1	1	1	0	1	0	0	1	1	0	0	0	0
Vibrio	fischeri	ESF436_4	GCF_021394775.1	SAMN24593132	Euprymna scolopes (This study)	Host	2	1	NZ_JAJVEF010000003	506126	458263		Yes, end of contig 3	100	40	2	1	1	1	1	1	1	1	1	1	1	1	1	0	1	0	0	1	0	0	1	1	0
Vibrio	fischeri	ESF436_5	GCF_021394745.1	SAMN24593133	Euprymna scolopes (This study)	Host	1	1	NZ_JAJVEG010000001	259302	279554	20252	No	84.6154	30	1	1	1	0	1	1	1	1	0	1	1	1	1	0	1	0	0	1	1	0	0	0	0
Vibrio	fischeri	ESF436_5	GCF_021394745.1	SAMN24593133	Euprymna scolopes (This study)	Host	2	1	NZ_JAJVEG010000002	10846	52698	41852	Yes, beginning of contig 2	84.6154	20	2	1	1	1	1	1	1	1	1	0	0	1	1	0	0	0	0	1	0	0	0	1	0
Vibrio	fischeri	ESF436_6	GCF_021394695.1	SAMN24593134	Euprymna scolopes (This study)	Host	1	1	NZ_JAJVEH010000001	641381	661645	20264	No	84.6154	30	1	1	1	0	1	1	1	1	0	1	1	1	1	0	1	0	0	1	1	0	0	0	0
Vibrio	fischeri	ESF436_6	GCF_021394695.1	SAMN24593134	Euprymna scolopes (This study)	Host	2	1	NZ_JAJVEH010000003	458263	497664		Yes, end of contig 3	100	40	2	1	1	1	1	1	1	1	1	1	1	1	1	0	1	0	0	1	0	0	1	1	0
Vibrio	fischeri	ESM429_1	GCF_021394875.1	SAMN24593128	Euprymna scolopes (This study)	Host	1	1	NZ_JAJVEB010000001	265396	285660	20264	No	84.6154	30	1	1	1	0	1	1	1	1	0	1	1	1	1	0	1	0	0	1	1	0	0	0	0
Vibrio	fischeri	ESM429_3	GCF_021394855.1	SAMN24593129	Euprymna scolopes (This study)	Host	1	1	NZ_JAJVEC010000001	265226	285490	20264	No	84.6154	30	1	1	1	0	1	1	1	1	0	1	1	1	1	0	1	0	0	1	1	0	0	0	0
Vibrio	fischeri	ESM429_4	GCF_021394835.1	SAMN24593130	Euprymna scolopes (This study)	Host	1	1	NZ_JAJVED010000002	275326	295590	20264	No	84.6154	30	1	1	1	0	1	1	1	1	0	1	1	1	1	0	1	0	0	1	1	0	0	0	0
Vibrio	fischeri	ESM429_4	GCF_021394835.1	SAMN24593130	Euprymna scolopes (This study)	Host	2	1	NZ_JAJVED010000001	346241	376980	30739	No	100	60	2	1	1	1	1	1	1	1	1	1	1	1	1	1	1	0	0	1	0	0	1	1	1
Vibrio	fischeri	ESM442_5	GCF_021394675.1	SAMN24593135	Euprymna scolopes (This study)	Host	1	1	NZ_JAJVEI010000001	466615	486879	20264	No	84.6154	30	1	1	1	0	1	1	1	1	0	1	1	1	1	0	1	0	0	1	1	0	0	0	0
Vibrio	fischeri	ESM442_6	GCF_021394635.1	SAMN24593136	Euprymna scolopes (This study)	Host	1	1	NZ_JAJVEJ010000001	261555	281819	20264	No	84.6154	30	1	1	1	0	1	1	1	1	0	1	1	1	1	0	1	0	0	1	1	0	0	0	0
Vibrio	fischeri	etasm.1.1	GCF_009727625.1	SAMN13340518	Euprymna tasmanica; Australia; Launceston, Tasmania	Host	1	1	NZ_WOBA01000007.1	90072	110336	20264	No	84.6154	30	1	1	1	0	1	1	1	1	0	1	1	1	1	0	1	0	0	1	1	0	0	0	0
Vibrio	fischeri	etasm.1.1	GCF_009727625.1	SAMN13340518	Euprymna tasmanica; Australia; Launceston, Tasmania	Host	2	1	NZ_WOBA01000004.1	10547	52434	41887	Yes, beginning of contig	84.6154	20	2	1	1	1	1	1	1	1	1	0	0	1	1	0	0	0	0	1	0	0	0	1	0
Vibrio	fischeri	etasm.2.1	GCF_009727615.1	SAMN13340519	Euprymna tasmanica; Australia; Launceston, Tasmania	Host	1	1	NZ_WOAZ01000004.1	586121	606385	20264	No	84.6154	30	1	1	1	0	1	1	1	1	0	1	1	1	1	0	1	0	0	1	1	0	0	0	0
Vibrio	fischeri	FF227	GCF_001691095.1	SAMN04867929	Filtered Seawater, 0.2-1 micron fraction; Massachusetts	Environmental	1	1	NZ_MAJW01000135.1	63535	83799	20264	No	84.6154	30	1	1	1	0	1	1	1	1	0	1	1	1	1	0	1	0	0	1	1	0	0	0	0
Vibrio	fischeri	FQ-A001	GCF_004359415.1	SAMN11031202	Euprymna scolopes	Host	1	1	NZ_SJSX01000002.1	745845	766109	20264	No	84.6154	30	1	1	1	0	1	1	1	1	0	1	1	1	1	0	1	0	0	1	1	0	0	0	0
Vibrio	fischeri	FQ-A001	GCF_004359415.1	SAMN11031202	Euprymna scolopes	Host	2	1	NZ_SJSX01000004.1	315371	377316	61945	No	100	60	2	1	1	1	1	1	1	1	1	1	1	1	1	1	1	0	0	1	0	0	1	1	1
Vibrio	fischeri	JCM18803	GCF_014647395.1	SAMD00245275	Missing; cellular organism; Wu L et al., "The Global Catalogue of Microorganisms (GCM) 10K type strain sequencing project: providing services to taxonomists for standard genome sequencing and annotation.", Int J Syst Evol Microbiol, 2019 Apr;69(4):895-898	NA	1	1	NZ_BMPC01000002.1	139728	159992	20264	No	84.6154	30	1	1	1	0	1	1	1	1	0	1	1	1	1	0	1	0	0	1	1	0	0	0	0
Vibrio	fischeri	JCM18803	GCF_014647395.1	SAMD00245275	Missing; cellular organism; Wu L et al., "The Global Catalogue of Microorganisms (GCM) 10K type strain sequencing project: providing services to taxonomists for standard genome sequencing and annotation.", Int J Syst Evol Microbiol, 2019 Apr;69(4):895-898	NA	2	1	NZ_BMPC01000033.1	14748	38556	23808	Yes, beginning and end of contig	76.9231	30	2	1	1	1	1	1	1	1	1	0	0	0	1	0	0	0	0	1	0	0	1	1	0
Vibrio	fischeri	KB1A98	GCF_001640325.1	SAMN04486008	Squid, Hawaii	Host	1	1	NZ_LTYV01000002.1	90766	111018	20252	No	84.6154	30	1	1	1	0	1	1	1	1	0	1	1	1	1	0	1	0	0	1	1	0	0	0	0
Vibrio	fischeri	KB1A98	GCF_001640325.1	SAMN04486008	Squid, Hawaii	Host	2	1	NZ_LTYV01000030.1	10811	52675	41864	Yes, beginning of contig	84.6154	20	2	1	1	1	1	1	1	1	1	0	0	1	1	0	0	0	0	1	0	0	0	1	0
Vibrio	fischeri	KB2B1	GCF_001640305.1	SAMN04486009	Squid, Hawaii	Host	1	1	NZ_JADOAV010000005.1	1397813	1418077	20264	No	84.6154	30	1	1	1	0	1	1	1	1	0	1	1	1	1	0	1	0	0	1	1	0	0	0	0
Vibrio	fischeri	KB2B1	GCF_001640305.1	SAMN04486009	Squid, Hawaii	Host	2	1	NZ_JADOAV010000004.1	1120949	1151688	30739	No	100	60	2	1	1	1	1	1	1	1	1	1	1	1	1	1	1	0	0	1	0	0	1	1	1
Vibrio	fischeri	KB4B5	GCF_001640505.1	SAMN04520026	Squid, Hawaii	Host	1	1	NZ_LTZD01000015.1	574373	594637	20264	No	84.6154	30	1	1	1	0	1	1	1	1	0	1	1	1	1	0	1	0	0	1	1	0	0	0	0
Vibrio	fischeri	KB4B5	GCF_001640505.1	SAMN04520026	Squid, Hawaii	Host	2	1	NZ_LTZD01000017.1	182242	244530	62288	No	100	60	2	1	1	1	1	1	1	1	1	1	1	1	1	1	1	0	0	1	0	0	1	1	1
Vibrio	fischeri	LB10LO6	GCF_021366275.1	SAMN24593138	Lolliguncula brevis, North Carolina, USA	Host	1	1	NZ_JAJVEL010000001.1	272481	292745	20264	No	84.6154	30	1	1	1	0	1	1	1	1	0	1	1	1	1	0	1	0	0	1	1	0	0	0	0
Vibrio	fischeri	lpeal.1.1	GCF_009727585.1	SAMN13340520	Doryteuthis pealeii; Woods Hole, MA	Host	1	1	NZ_WOAY01000026.1	58849	79113	20264	No	84.6154	30	1	1	1	0	1	1	1	1	0	1	1	1	1	0	1	0	0	1	1	0	0	0	0
Vibrio	fischeri	lpeal.1.1	GCF_009727585.1	SAMN13340520	Doryteuthis pealeii; Woods Hole, MA	Host	2	1	NZ_WOAY01000005.1	11131	52923	41792	Yes, beginning of contig	84.6154	20	2	1	1	1	1	1	1	1	1	0	0	1	1	0	0	0	0	1	0	0	0	1	0
Vibrio	fischeri	lpeal.1.2	GCF_009727525.1	SAMN13340521	Doryteuthis pealeii; Woods Hole, MA	Host	1	1	NZ_WOAX01000001.1	366895	387159	20264	No	84.6154	30	1	1	1	0	1	1	1	1	0	1	1	1	1	0	1	0	0	1	1	0	0	0	0
Vibrio	fischeri	lpeal.1.2	GCF_009727525.1	SAMN13340521	Doryteuthis pealeii; Woods Hole, MA	Host	2	1	NZ_WOAX01000004.1	345639	388756	43117	Yes, end of contig	84.6154	20	2	1	1	1	1	1	1	1	1	0	0	1	1	0	0	0	0	1	0	0	0	1	0
Vibrio	fischeri	MB11B1	GCF_001640385.1	SAMN04519655	Squid, hawaii	Host	1	1	NZ_LTYY01000045.1	44991	65255	20264	No	84.6154	30	1	1	1	0	1	1	1	1	0	1	1	1	1	0	1	0	0	1	1	0	0	0	0
Vibrio	fischeri	MB11B1	GCF_001640385.1	SAMN04519655	Squid, hawaii	Host	2	1	NZ_LTYY01000001.1	49226	79965	30739	No	100	60	2	1	1	1	1	1	1	1	1	1	1	1	1	1	1	0	0	1	0	0	1	1	1
Vibrio	fischeri	MB13B1	GCF_001640415.1	SAMN04519656	Squid, hawaii	Host	1	1	NZ_LTZA01000013.1	460336	480600	20264	No	84.6154	30	1	1	1	0	1	1	1	1	0	1	1	1	1	0	1	0	0	1	1	0	0	0	0
Vibrio	fischeri	MB13B2	GCF_001640445.1	SAMN04519657	Squid, hawaii	Host	1	1	NZ_JADOAU010000006.1	2914776	2935040	20264	No	84.6154	30	1	1	1	0	1	1	1	1	0	1	1	1	1	0	1	0	0	1	1	0	0	0	0
Vibrio	fischeri	MB13B2	GCF_017921865.1	SAMN16728134	Squid, Hawaii	Host	2	1	NZ_JADOAU010000001.1	582736	613475	30739	No	100	60	2	1	1	1	1	1	1	1	1	1	1	1	1	1	1	0	0	1	0	0	1	1	1
Vibrio	fischeri	MB13B3	GCF_001640465.1	SAMN04519658	Squid, hawaii	Host	1	1	NZ_LTZC01000001.1	44991	65255	20264	No	84.6154	30	1	1	1	0	1	1	1	1	0	1	1	1	1	0	1	0	0	1	1	0	0	0	0
Vibrio	fischeri	MB13B3	GCF_001640465.1	SAMN04519658	Squid, hawaii	Host	2	1	NZ_LTZC01000010.1	49212	79951	30739	Yes, end of contig	100	50	2	1	1	1	1	1	1	1	1	1	1	1	1	1	1	0	0	1	0	0	1	1	0
Vibrio	fischeri	MB14A3	GCF_001640375.1	SAMN04519653	squid, hawaii	Host	1	1	NZ_LTYX01000013.1	642218	662482	20264	No	84.6154	30	1	1	1	0	1	1	1	1	0	1	1	1	1	0	1	0	0	1	1	0	0	0	0
Vibrio	fischeri	MB14A3	GCF_001640375.1	SAMN04519653	squid, hawaii	Host	2	1	NZ_LTYX01000015.1	279412	341597	62185	No	100	60	2	1	1	1	1	1	1	1	1	1	1	1	1	1	1	0	0	1	0	0	1	1	1
Vibrio	fischeri	MB15A4	GCF_001640455.1	SAMN04519654	Squid, Hawaii	Host	1	1	NZ_LTYZ01000001.1	50615	70879	20264	No	84.6154	30	1	1	1	0	1	1	1	1	0	1	1	1	1	0	1	0	0	1	1	0	0	0	0
Vibrio	fischeri	MB15A5	GCF_001640525.1	SAMN04520027	Squid, hawaii	Host	1	1	NZ_LTZE01000014.1	270803	291070	20267	No	84.6154	30	1	1	1	0	1	1	1	1	0	1	1	1	1	0	1	0	0	1	1	0	0	0	0
Vibrio	fischeri	MB15A5	GCF_001640525.1	SAMN04520027	Squid, hawaii	Host	2	1	NZ_LTZE01000017.1	10072	53203	43131	Yes, beginning of contig	84.6154	30	2	1	1	1	1	1	1	1	1	0	0	1	1	0	0	0	0	1	0	0	1	1	0
Vibrio	fischeri	MJ11	GCF_000020845.1	SAMN02603627	Pinecone fish Monocentris japonicus	Host	1	1	NC_011184.1	1125502	1145766	20264	No	84.6154	30	1	1	1	0	1	1	1	1	0	1	1	1	1	0	1	0	0	1	1	0	0	0	0
Vibrio	fischeri	MJ11	GCF_000020845.1	SAMN02603627	Pinecone fish Monocentris japonicus	Host	2	1	NC_011186.1	877771	941363	63592	No	100	60	2	1	1	1	1	1	1	1	1	1	1	1	1	1	1	0	0	1	0	0	1	1	1
Vibrio	fischeri	NBRC101058	GCF_007989845.1	SAMD00166004	Octopus vulgaris; Japan, Kanagawa, Miura, Misaki	Host	1	1	NZ_BJTZ01000002.1	262828	283092	20264	No	84.6154	30	1	1	1	0	1	1	1	1	0	1	1	1	1	0	1	0	0	1	1	0	0	0	0
Vibrio	fischeri	NBRC101058	GCF_007989845.1	SAMD00166004	Octopus vulgaris; Japan, Kanagawa, Miura, Misaki	Host	2	1	NZ_BJTZ01000001.1	92853	155247	62394	No	100	60	2	1	1	1	1	1	1	1	1	1	1	1	1	1	1	0	0	1	0	0	1	1	1
Vibrio	fischeri	SR5	GCF_000241785.1	SAMN02470712	Sepiola robusta (bobtail squid); Mediterranean Sea	Host	1	1	NZ_CM001400.1	1081477	1101741	20264	No	84.6154	30	1	1	1	0	1	1	1	1	0	1	1	1	1	0	1	0	0	1	1	0	0	0	0
Vibrio	fischeri	VCW2E2	GCF_001029395.1	SAMN03652539	USA:Hawaii, homogenous culture; Bioluminescent Vibrio fischeri spontaneous suppressor of VCW2A1, a derivative of the squid symbiotic VCW1C6 strain. This strain was sequenced for suppressor study to elucidate mechanisms for frequent GacA suppression. Linked IhfA to the GacA pathway	Host	1	1	NZ_LCYF01000002.1	566507	586771	20264	No	84.6154	30	1	1	1	0	1	1	1	1	0	1	1	1	1	0	1	0	0	1	1	0	0	0	0
Vibrio	fischeri	VLS2	GCF_001640545.1	SAMN04520028	Squid, Hawaii	Host	1	1	NZ_LTZF01000019.1	641001	661265	20264	No	84.6154	30	1	1	1	0	1	1	1	1	0	1	1	1	1	0	1	0	0	1	1	0	0	0	0
Vibrio	fischeri	ZF-211	GCF_000287175.2	SAMN02470496	filtered seawater (64um filter); USA: Massachusetts	Environmental	1	1	NZ_AJYI02000040.1	11351	31615	20264	No	84.6154	30	1	1	1	0	1	1	1	1	0	1	1	1	1	0	1	0	0	1	1	0	0	0	0
Vibrio	fischeri	ZF25	GCF_001730145.1	SAMN05449650	Filtered Seawater, >63 micron fraction; Massachusetts	Environmental	1	1	NZ_MCGK01000002.1	202210	222474	20264	No	84.6154	30	1	1	1	0	1	1	1	1	0	1	1	1	1	0	1	0	0	1	1	0	0	0	0
Vibrio	fischeri	ZF47	GCF_001691135.1	SAMN04867925	Filtered Seawater, >63 micron fraction; Massachusetts	Environmental	1	1	NZ_MAJY01000007.1	68365	88629	20264	No	84.6154	30	1	1	1	0	1	1	1	1	0	1	1	1	1	0	1	0	0	1	1	0	0	0	0
Vibrio	fischeri	ZF47	GCF_001691135.1	SAMN04867925	Filtered Seawater, >63 micron fraction; Massachusetts	Environmental	2	1	NZ_MAJY01000009.1	266998	328465	61467	No	100	60	2	1	1	1	1	1	1	1	1	1	1	1	1	1	1	0	0	1	0	0	1	1	1
Vibrio	fischeri	ZF73	GCF_001691105.1	SAMN04867926	Filtered Seawater, >63 micron fraction; Massachusetts	Environmental	1	1	NZ_MAJX01000039.1	79073	99337	20264	No	84.6154	30	1	1	1	0	1	1	1	1	0	1	1	1	1	0	1	0	0	1	1	0	0	0	0
Vibrio	harveyi	ATCC14126	GCF_001591145.1	SAMD00046755	Dead luminescing amphipod	Host	1	5	NZ_BCUF01000025.1	31683	57677	25994	No	100	60	1	1	2	1	1	1	1	1	1	1	1	1	1	0	1	1	2	1	1	1	0	0	0
Vibrio	harveyi	ATCC14126	GCF_001591145.1	SAMD00046755	Dead luminescing amphipod	Host	2	5	NZ_BCUF01000037.1	14909	38392	23483	No	100	30	1	1	2	1	1	1	1	1	1	1	1	1	1	0	1	0	1	1	0	0	0	0	0
Vibrio	harveyi	ATCC14126	GCF_001591145.1	SAMD00046755	Dead luminescing amphipod	Host	3	1	NZ_BCUF01000049.1	1142	29681	28539	No	100	20	2	1	1	1	1	1	1	1	1	1	1	1	1	0	1	0	0	1	0	0	0	0	0
Vibrio	logei	5S-186	GCF_000286935.2	SAMN02470497	Filtered seawater (5um filter), Massachusetts, USA	Environmental	1	1	NZ_AJYJ02000044.1	257706	277929	20223	No	84.6154	30	1	1	1	0	1	1	1	1	0	1	1	1	1	0	1	0	0	1	1	0	0	0	0
Vibrio	logei	5S-186	GCF_000286935.2	SAMN02470497	Filtered seawater (5um filter), Massachusetts, USA	Environmental	2	1	NZ_AJYJ02000091.1	49190	84053	34863	No	100	20	2	1	1	1	1	1	1	1	1	1	1	1	1	0	1	0	0	1	0	0	0	0	0
Vibrio	parahaemolyticus	BB22OP	GCF_000328405.1	SAMN02604302	Bangladesh	Environmental	1	1	NC_019955.1	1457648	1495016	37368	No	100	30	2	1	1	1	1	1	1	1	1	1	1	2	1	1	1	0	0	1	0	0	0	0	0
Vibrio	parahaemolyticus	BB22OP	GCF_000328405.1	SAMN02604302	Bangladesh	Environmental	2	5	NC_019971.1	1048345	1074385	26040	No	100	60	1	1	2	1	1	1	1	1	1	1	1	1	1	0	1	1	2	1	1	1	0	0	0
Vibrio	parahaemolyticus	RIMD 2210633	GCF_000196095.1	SAMD00058707	Homo sapien	Host	1	1	NC_004603.1	1492844	1524323	31479	No	100	40	2	1	1	1	1	1	1	1	1	1	1	1	1	1	1	0	0	1	0	0	0	1	0
Vibrio	parahaemolyticus	RIMD 2210633	GCF_000196095.1	SAMD00058707	Homo sapien	Host	2	5	NC_004605.1	1079347	1105380	26033	No	100	60	1	1	2	1	1	1	1	1	1	1	1	1	1	0	1	1	1	1	1	1	0	0	0
Vibrio	salmonicida	LFI1238	GCF_000196495.1	SAMEA1705917	Fish pathogen	Host	1	1	NC_011312.1	1209042	1228302	19260	No	84.6154	20	1	1	1	0	1	1	1	1	0	1	1	1	3	0	1	0	0	0	1	0	0	0	0
Vibrio	salmonicida	LFI1238	GCF_000196495.1	SAMEA1705917	Fish pathogen	Host	2	5	NC_011312.1	1272187	1293727	21540	No	92.3077	30	1	1	2	1	1	1	1	1	0	1	1	1	2	0	1	0	2	1	0	0	0	0	0
Vibrio	vulnificus	YJ016	GCF_000009745.1	SAMD00061075	Hospital isolate, Taiwan	Host	1	5	NC_005140.1	1086439	1112504	26065	No	100	60	1	1	2	1	1	1	1	1	1	1	1	1	1	0	1	1	2	1	1	1	0	0	0
Yersinia	pestis	CO92	GCF_000009065.1	SAMEA1705942	Homo sapien	Host	1	3	NC_003143.1	532728	556315	23587	No	100	10	1	1	1	1	1	1	1	1	1	1	1	1	1	1	0	0	0	0	0	0	0	0	0
Yersinia	pestis	CO92	GCF_000009065.1	SAMEA1705942	Homo sapien	Host	2	2	NC_003143.1	1656394	1689928	33534	No	100	10	2	1	1	1	1	1	1	1	1	1	1	2	1	0	0	0	1	0	0	0	0	0	0
Yersinia	pestis	CO92	GCF_000009065.1	SAMEA1705942	Homo sapien	Host	3	3	NC_003143.1	3276968	3310933	33965	No	76.9231	0	1	1	1	2	0	1	1	1	0	1	1	2	0	0	0	0	0	0	0	0	0	0	0
Yersinia	pestis	CO92	GCF_000009065.1	SAMEA1705942	Homo sapien	Host	4	3	NC_003143.1	4000975	4033587	32612	No	61.5385	10	2	0	0	0	0	1	1	1	2	0	1	1	1	0	0	0	2	0	0	0	0	0	0

## Sheet: Table_S4
Table S4. ANI values of V. fischeri strains isolated in this study
	ESF436_3	ESF436_4	ESF436_5	ESF436_6	ESF442_5	ESF442_6	ESM429_1	ESM429_3	ESM429_4	LB10LO6	V. fischeri ATCC 7744	V. fischeri ES114	V. fischeri ES401	V. fischeri lpeal.1.1	V. fischeri MJ11	V. logei 5S-186	V. salmonicida LFI1238
ESF436_3	100	99.9991	98.4153	99.9961	98.4024	98.3772	98.2915	98.2806	98.1184	95.5644	95.4951	97.8994	98.4711	95.4939	95.7905	81.7911	82.0066
ESF436_4	99.9988	100	98.3922	99.9984	98.3766	98.3724	98.2892	98.2724	98.0905	95.5565	95.5199	97.8676	98.4191	95.4667	95.8126	81.8653	81.9499
ESF436_5	98.4193	98.406	100	98.3776	98.4011	98.3915	98.2552	98.2584	98.1073	95.5939	95.5589	97.8367	98.3042	95.5225	95.8599	81.7937	81.9421
ESF436_6	99.999	99.9993	98.4059	100	98.3598	98.3738	98.2761	98.2648	98.1143	95.575	95.49	97.9225	98.42	95.4828	95.8268	81.9276	82.0699
ESF442_5	98.4016	98.3783	98.3986	98.4126	100	99.995	98.3398	98.3488	98.0961	95.5576	95.565	98.0121	98.4635	95.5133	95.801	81.8188	81.9639
ESF442_6	98.3723	98.368	98.3671	98.3779	99.998	100	98.3498	98.3595	98.0856	95.5559	95.5527	97.9809	98.4681	95.4556	95.8277	81.7952	81.9951
ESM429_1	98.2984	98.2111	98.2449	98.2691	98.3586	98.3435	100	99.9975	98.0751	95.5282	95.5712	97.9495	98.3593	95.4635	95.8232	81.9364	82.0269
ESM429_3	98.2982	98.2706	98.2432	98.2876	98.3039	98.312	99.9984	100	98.0885	95.553	95.4562	97.933	98.3512	95.4504	95.8196	81.8481	81.9794
ESM429_4	98.0509	98.0058	98.1528	98.0342	98.0224	98.051	98.0871	98.0777	100	95.5473	95.46	97.7257	98.0046	95.3896	95.7857	81.7264	81.9967
LB10LO6	95.5368	95.5326	95.5801	95.5004	95.5664	95.525	95.5158	95.5445	95.5229	100	97.9066	95.5427	95.5659	98.2992	97.9881	81.7779	82.0443
V. fischeri ATCC 7744	95.4581	95.4792	95.5613	95.5096	95.4977	95.5093	95.4955	95.5048	95.5117	97.9231	100	95.4941	95.4821	98.1296	97.4359	81.9756	82.0623
V. fischeri ES114	97.9329	97.9084	97.8959	97.8908	97.9874	97.9609	97.954	97.9368	97.6762	95.5486	95.4566	100	97.9334	95.4422	95.8576	81.6401	82.2873
V. fischeri ES401	98.3425	98.3326	98.3048	98.39	98.4026	98.3929	98.3141	98.318	98.0286	95.5286	95.472	97.8941	100	95.4983	95.787	81.7013	82.1458
V. fischeri lpeal.1.1	95.5155	95.4797	95.5647	95.4999	95.506	95.4692	95.4491	95.4747	95.4037	98.2967	98.1996	95.3919	95.5388	100	97.7223	81.6503	81.9383
V. fischeri MJ11	95.6999	95.7039	95.8095	95.6779	95.7192	95.7327	95.762	95.7742	95.7134	97.9759	97.3721	95.8142	95.7672	97.6801	100	81.8819	82.3433
V. logei 5S-186	81.9056	81.9078	81.822	81.9282	81.8576	81.7772	81.9115	81.8938	81.9129	81.9474	81.9575	81.7454	81.7855	81.8243	82.0385	100	97.1292
V. salmonicida LFI1238	82.0421	82.0239	82.0575	82.0339	82.0564	81.9863	82.1035	82.0614	81.9572	82.0449	82.0837	82.2326	82.5113	82.1346	82.4253	97.1025	100

## Sheet: Table_S5
Table S5. ANI values of V. campbellii KNH1 compared to reference vibrio strains
Reference Strain	NCBI Accession	ANI value
V. campbellii KNH1	GCF_021397475.1	100
V. campbellii LB102	GCF_002027615.1	97.8416
V. campbellii LMB29	GCF_001969325.1	97.8172
V. campbellii 051011E	GCF_000818295.1	97.7398
V. campbellii 051011G	GCF_000818235.1	97.6483
V. campbellii ATCC BAA-1116	GCF_000464435.1	96.2368
V. harveyi CAIM606	GCF_001185455.1	89.7816
V. harveyi VHJR7	GCF_000442925.1	89.7367
V. harveyi FDAARGOS_107	GCF_001558435.2	89.6102
V. harveyi 2415-05	GCF_001185545.1	89.3243
V. harveyi BSW7	GCF_000834095.1	89.1443
V. parahaemolyticus FDAARGOS_115	GCF_001558495.2	83.753
V. parahaemolyticus BB22OP	GCF_000328405.1	83.6143
V. vulnificus YJ016	GCF_000009745.1	80.7984
V. cholerae O395	GCF_000016245.1	78.5863

## Sheet: Table_S6
Table S6. Predicted genes of V. fischeri T6SS2 clusters that appear in Figure 5
Genotype	Anvio Unique Gene ID	Anvio Gene Cluster ID	Anvio Gene Bin	Genome	Genomic region size (bp)	Genomic region GC%	Genome GC%	KOfam Accession	Kofam	KEGG Class Accession	KEGG Class	KEGG Module Accession	KEGG Module	SecReT6 Effector ID	Blastp % ID to Effector	Blastp E-value to Effector	Effector Annotation	Blastp % ID to NCBI NR	Blastp E-value to NCBI NR	NCBI accession	NCBI Description	Amino Acid Sequence
1	1	GC_00000001	flanking	ATCC7744_cat	65173	36.6	38.2											47.917	1.71e-27	RGC81918	PTS fructose-like transporter subunit IIB [Hungatella hathewayi]	MKIVAVTACPTGIAHTYMAADVLKKAAAKLGVSIKVETQGAMGVENVLTPVDIVSADLVIIASDIEIEDKNRFLGINSKQFPIETILTDVEGILKKHLF
1	2	GC_00000001	flanking	ATCC7744_cat	65173	36.6	38.2	K11203	fructoselike PTS system EIIC or EIIBC or EIIABC component									61.587	0	WP_117709256	PTS fructose transporter subunit EIIC [Fusobacterium mortiferum]	MDITSLINANVICLDLKSTSKEDILQEMVQILDDAGKLSNKTQFLADVWAREEIGNTGFEDGIAIPHAKSSAVLTPSVAIGISRTGIDYGAEDGEPSDIFFMLASTDGDDNQHIEALAQISSRLIEDGFTNKLKKADTKEEILDLFTDIIQPSTESTDIENAPSQIEKSELTRKLGRTKEHLLFGTSHMIPFIVAGGVLLSLSVMISGQGAVPTEGILADIAQMGIAGLTLFTAVLGGYIAYSIADKPGLAPGMIGSWIAVQQYNTGFLGAIIIGFFAGFVVRSLKKIKLPESMASLGSIFIYPLVGTFLTCAAVMWVIGAPISNAMAALNEWLASMAGSGKIALGAILGAMAAFDMGGPINKVATLFAQTQVNTQPWLMGGVGIAICTPPLGMALATF…
1	137	GC_00000002	flanking	ATCC7744_cat	65173	36.6	38.2	K07001	NTE family protein									30.842	2.82e-101	WP_119143698	patatin-like phospholipase family protein [Pseudomonas reidholzensis]	MRHVFRLKLWFVFLATFLFTPYLYAEPIKEPSRPKIALVLAGGGAKGAAHIGVLKALEELNIPIDIITGTSMGAYVGGLYATGKSASEIEAYLHTVDWYSGYQDEVGREEKNSRDKKYEDRFAINPSLGIRKEGVKSPKSAIQGQNMLKILRETSGNPVSVASFDDFPIRYRSVATDIVSMEEVVIDHGLLVDAMMASMSVPGALPPYEFEDKLLIDGGVTNNMPVELAKEMGADIVIAVDISSNYMTKEQIGSLFDVASQLTNFMVKRSTQEQAEFLTDKDILLQPRVGDIETTDFSSMSRAYQEGYDTAMTLKSRLKSLAVTPNEYAQYSNRKKQQSANVRLAQGAIIDKVEVENRSHYESDKLERFIQFEKGTSLNSDYIEGKIHALYATNRFETI…
1	207	GC_00000003	flanking	ATCC7744_cat	65173	36.6	38.2											30.097	1.17e-08	WP_116986099	phosphoenolpyruvate--protein phosphotransferase, partial [Escherichia coli]	MELNTIDYRITFFVKDQGLPPQVASQLTRLAKKFKSLVYIDNITQNRSTNAESSLGLLQVGLCPGDFCQLITVGMDAEWANFVLTDLLSSTFDFVASDKLCDFSETITNTYPQLTPQCEVDFHYVKAQAVLSKFEILKGLSQLIYPKESDELLLALIKREERSSTAMAKQIALPHVISPYVEKPTIAIIRSDYPVDWASKMGDVNVIIALVLPEKPTKEMIMAATYLTRSLLSEDFSQRLVHTRQPKGLQALILYAMCQLL
1	275	GC_00000004	flanking	ATCC7744_cat	65173	36.6	38.2	K01809	mannose6phosphate isomerase [EC:5.3.1.8]	M00114	Pathway modules; Carbohydrate metabolism; Other carbohydrate metabolism	M00114	Ascorbate biosynthesis, plants, fructose6P > ascorbate					62.916	4.16e-175	WP_005478337	mannose-6-phosphate isomerase, class I [Vibrio parahaemolyticus]	MNALKPQTFYPMTNVIQDYAWGSHTSIEALFDIKNNTGKPQAELWMGAHPNGCSAVTVNGDSVLLSDLINQDKEAFLSKTTADAFGELPYLFKVLAAEKALSIQVHPNKQQAVDGFEKEEKTGIALTAFNRNYKDNNHKPELVYALTDYKAMNGFRDYQEIVSLFSAMQLPTIASYVDDLAQEPNSNGLQRFFKAILSLENETKERAVAELLDYASSSTDELFVLLQELAIQYPNDVGLFAPLMLNVITLKPGEAMFLSACTPHAYIHGTGLEIMANSDNVLRAGLTPKYMDIDELMSCTEFVSQPLSSLLTQPNTVDGGMSYPIPVNDFKFSVFTATDALTLETNSAEILFAIDSDLTLTHENGESVTVAKGHSVFIPAYAKRYSLTSNGNVARAYN
1	343	GC_00000005	conserved_T6SS	ATCC7744_cat	65173	36.6	38.2											50	4.43e-11	P96156	Chitodextrinase; AltName: Full=Endo-chitodextinase; Flags: Precursor	MIKLNKITAAITSVMFSGYLYAADASATSNVVTFVPGETKVQNGDMVSFNGDCFVAKNNPGVWESPTADSWFWDVAECSGEPNPGPGPNPGPNPTPDPDLGDIIPFIPGKTQVENGDVVSYENQCFIAQNNPGVWETPSASSWFWTLTECSDEPVNPEPEVTELSILAPTAGQVLTANEAISINAHVDGNLAAKIEFWANNTKLAEKTVNQNNTQYSQTWTPSEEGNATINVFVFDKNNQKIEQKSVSVTVKAEVTEDFVAPVVKFVTPANGSTMNVAESLSISVNATDADNDLATLIVKANNKEICSFDAANTDTFACDWQPTQAGNVTLNAIATDAQDLSSTATVRITVEEDVVEPPVEPPVTPGDLCKDFNVYPDWTRGDHATGGDIMVHDNIAYS…
1	408	GC_00000006	conserved_T6SS	ATCC7744_cat	65173	36.6	38.2	K11892	type VI secretion system protein ImpK									24.8	1.8e-08	WP_010910863	type VI secretion system protein TssL, long form [Mesorhizobium japonicum]	MSYVEDDVTVVLFQPEPGKPMEVMPAPDLSRNISVSELDISSMGINPLVDQFSWLIASLSCMSSIPWLDDPMPFREQVAREIRKGERMLNEMEVDRASILVIRYCLCAAMDESVCRQEWGANSNWSQNSLLSEFHNETSGGDKFFVILDRLKADPRKYRHVIEFLYLLLQLGFKGKYGRAERGAESLTEIGNTIYRLVRDERLAEQEKVALVDVKSKYLKKPLKRVLPPKLILGVSALLFAAMYAATYLVIDVRFQKLLSLYQ
1	448	GC_00000007	conserved_T6SS	ATCC7744_cat	65173	36.6	38.2											41.606	8.98e-99	WP_011105819	hypothetical protein [Vibrio parahaemolyticus]	MTIFIVILTIYMVYVSRCHLFTNKYNACSLITTTRFYIFMRIFSFLKLFAGLGLILLISSCGGESKDTSPPKRETTSVSGILFDAPIAGARVVLWEYANGAIGKKLGETRTSSKGDYSMEVNSGSMPVLLQAFGGAYTDPATGEVVYEGDGKTLKFESTAFFYENKANRIMLTPLSLISKGLADYKIHKLGMDAEGAIDSANSTISNMYGFDVITVEPIDIVKGGQSAYVTTGHQYGAYLTAYSVFSSDLIKKYPASDSSSIYTSFTLSDIMYRDISADGQLDGYETDNISGLDKKISFGKESVSVETYTNILSQYILITVNNNRLNVSGTNPNDYKPFASKVNKLGTTPETMTVFPPRTEVPIDDTEPTVERSDKDVLVRLDSLDLLVKDNVGTKSLR…
1	488	GC_00000008	conserved_T6SS	ATCC7744_cat	65173	36.6	38.2	K11906	type VI secretion system protein VasD									26.984	4.76e-15	WP_010910850	type VI secretion system lipoprotein TssJ [Mesorhizobium]	MRKLLTFSLIFLLSGCTMWDQFKESTGITPETSSIELIITADKVLNVREGGQSSPVILRIHELNSPVLFRNLDFFALFENDKDALGDEYIKRYEYQIQPGDVVHETLVLDPATRAIGFSVAFRDINGSSWRKVELIEEKSEYFLKLNLKESELSSNNTRGIEQIYF
1	526	GC_00000009	conserved_T6SS	ATCC7744_cat	65173	36.6	38.2	K11893	type VI secretion system protein ImpJ									33.107	1.92e-83	WP_005463797	type VI secretion system baseplate subunit TssK [Vibrio parahaemolyticus]	MSLYNPVVWQDGMFMKPQHFQQLDRFQGKQSGMLSGFESPLHWGIKRIEINTELLALGKIGITHAEGILQDRTPFDLPLHASLPEVKDVDASVANKVLYLCCPLPSERSELFGTGKDGARYSIHTQDAVDACYDSEEIANITIGKLNFCLMYEDEDKSAYTSIPILKISEVKPDGSIILDNAYIPTCIDINASTVLKKFTTEFASMLRHRAESIVQRLGVVDQQGVSSVSDFMLLQALNRYEPLFWHFANIEGVHPEAFYRVLLQAEGELATLCSSSRRPQEFVPYNHGNLTSCLSTILHNSKVTLSVMSEQRAIPLPLKEQGYGIRIAPISDRSIVESTTFILAVKADVTLDILHTQFVSQTKIGSIDNIRELINLQLPGINIKPMPVVPRALPYHAG…
1	564	GC_00000010	conserved_T6SS	ATCC7744_cat	65173	36.6	38.2											66	1.75e-97	WP_011105828	hypothetical protein [Vibrio parahaemolyticus]	MAKPIQLGFMALIMACSLPAFAKGERYGIAANFKTIESTEYEQGMSGELSTISYGLVHTRPIDENNNRWRWLFGFNYLSDYIEAPANGVYQEVTNYEFRIVPQYALGNWWAFTPYVGAGLSLGYSQYGNRWKVDHEGYKYGNQLDDIDQFEVGAVLSFGTVIKLGSNPDAHLQIIPQASYIQPIYNDGLGGLELSVSLLF
1	602	GC_00000011	conserved_T6SS	ATCC7744_cat	65173	36.6	38.2											39.13	0.000442	WP_117539334	FHA domain-containing protein [Coprococcus catus]	MHLNQLTLFITKSPEEYTGSKHIEMPEGGGSLGRNPSNTVSLVDHNRFISGSHCLISIYGDTYYLSDVSTNGTLVNGNKLLKNQPISLYDGDTIVLGRYEISVGLEKLSNSVNIAADISEETDSTDPLVNLAEYTPDEEQDKGNIADLFKETRIDKVDSSDPVAHLNFITQTNNDDHLLHGNEKKHEQKINEPVHTRQLLDDSDSVHSEFDVPNLIPEDWFSNDLANTSMPPVQIDEPIATSSESEPMVHSFVDSTPETIIPSVTEQLAWEDVTQTIQPSVSTTEPKSDEFFIAPSTSMDVYPSQSIETSFNSKMSDDAASAFYKGLGMSASQIEQTDEQFFQQMGNCLRLCINNLQKELSELKAIKNNEQDDSMTNIVELMLSLNHQQLLSPNELIEQ…
1	640	GC_00000012	conserved_T6SS	ATCC7744_cat	65173	36.6	38.2											30.882	1.68e-20	WP_116949140	Lrp/AsnC family transcriptional regulator [Jiangella endophytica]	MSNMNLQGLDKLDRRIISNLLSNGRESIANLSRNVGLSRTAVAERINRLEKTGIIKGYTAQIRMGNKDENASSYLLISCNKGQKDSVSDGLKEIPEVKMTSIVGGTYDIICLIEAPDLHRIHYLCSEIESLSGIKEVKNTIVLHQPVCR
1	676	GC_00000013	conserved_T6SS	ATCC7744_cat	65173	36.6	38.2	K11901	type VI secretion system protein ImpB									40	2.67e-32	WP_117580760	type VI secretion system contractile sheath small subunit [Enterobacter]	MSRDGSVAPKERINIRYVPATGDVQEDVELPLSMMVVGDFTARTDETPIEDRTPINIDKDNFNDVMEGYSPNVKVNVDNKLSDEEGAQLGVDLTFNSMKDFSPEAIAKSVPELNGLLELREALVALKGPLGNVPAFRKKIAAVLQDEEARQKLLEELNIGSAKEEAKAE
1	712	GC_00000014	conserved_T6SS	ATCC7744_cat	65173	36.6	38.2	K11905	type VI secretion system protein													MEKGYRLLERIELGEPKNCYEKVVSHKHLIESIHLHLADLLNTHAGNAMIDNDYGLPDFNDVLSNNTNLVRNIQQNIKVSIEKFEPRMRNVEVHYRHDNNNPLQLGFGIGGEVIHNGGKVPMAINIFMGVDGQFNV
1	748	GC_00000015	conserved_T6SS	ATCC7744_cat	65173	36.6	38.2	K11900	type VI secretion system protein ImpC									60.288	0	WP_117611541	type VI secretion system contractile sheath large subunit [Escherichia coli]	MTAEAQAPEQEAALVESGSLLDSILNETRLKPSDEGFDVAKRGVEAFIGELLSTNTSDKVDQSLVDLMISEIDQKLSKQVDAILHNEEVQAIESTWRGLKYLVDHTDFRENIQIELISAKKDEVLDDFEDAPEVVKSGLYKQIYTREYGQFGGKPVGAVICDFQMSASSPDIKLMEYMANVGAMSHAPFITSASAKFFGLDSYEELPNLKDLKSVFEGPQYTKWRGFREHEDARYVGLCTSRMMLRTPYSVEDNPIKAFDYNEHVKDGHDNYLWGNSAYAMASKISESFAKYRWCPNIIGPQSGGTVSDLPVYNYESMGQIETKIPTEILISDRREYELAEEGFIALTMRKGSDNAAFFSANSVQKAKVFPNTPEGQQAEMNYKLGIQLPYMFIINRLA…
1	784	GC_00000016	conserved_T6SS	ATCC7744_cat	65173	36.6	38.2	K11903	type VI secretion system secreted protein Hcp									52.326	6.63e-65	WP_137712216	Hcp family type VI secretion system effector [Brenneria rubrifaciens]	MPTPAYMSIKGETQGDITKDAYSADSVGNVWQEAHVDEFLVQELDHVLTVPRDPQSGQPTGQRVHRPVVVTKQQDRCSPLLFNSLVSGEKLPECNIKFYRTSTSGKQEHYYTIKLIDALLVDMQTRMAHCQDAAMSDRVTEEVLKFTYRAIEVTHETCGTAGNDDWRTPREA
1	820	GC_00000017	conserved_T6SS	ATCC7744_cat	65173	36.6	38.2											45.455	1.26e-07	WP_117031792	DUF2169 domain-containing protein, partial [Klebsiella pneumoniae]	MQLWDIDSESPFTLKGRFQRDSEGHEVWVLSMKRAWTFLDGSWSEEVDNLELNDDPIYLGEPGFSAMVADHDFPIYKKNTDVLIYGKARSYAKKPVHSQLCRVLIDEHIDKTLKVVGERHWVDHSGSITVSTTQSFIERDIDYSNAIGGDERNRIGGGAAETNVELLKAKVPSIFYPDQNWQASSKKVKVAGFGPMPPFFHDRAKWAGTFDEKWFEERRPVWPIDFDARFYQSAPQDQQCNGYLQGGERLMVSGFCHNDALSFRIPSEKFQAVAVFNGKEEKINMPMYTLWIDTENKRIEATYTAAFPCQNREHLLTSSYLVELS
1	856	GC_00000018	conserved_T6SS	ATCC7744_cat	65173	36.6	38.2	K11895	type VI secretion system protein ImpH									32.523	1.45e-54	WP_000348794	type VI secretion system baseplate subunit TssG [Escherichia coli]	MIQYIVNKPCDYSFFQAVSLLEKHYQNLSGIEYKAIGENQYVKNEYIQFSVSPKLSFPKSDIEFITEFERNDATYTQIEVNFMGLHGVSSPLPASYTEKLAGRDPDDNPVKEFFDFFHHRYISMLYRVWKKYRYHIQYKSDAKDPFSGRLLHLVGLSSVIQESNEVDLDRAKLLSYVNQLSTRTRSPKLVSGIVSHYFSLSNVYIEEWVYRRITIAVSQRNCLNRKNCQLGGDFHLGQSMADLTGKFNLCIDDIDFDTYVKFLPGGALHETLIGLMKFILCDPMAWDLKLTVRNKSLPINQLGDGLGNELGQTFWLGSAKGEETKIKIVGSN
1	892	GC_00000019	conserved_T6SS	ATCC7744_cat	65173	36.6	38.2	K11914	sigma54 dependent transcriptional regulator									41.463	2.36e-77	WP_126397535	sigma 54-interacting transcriptional regulator [Blastochloris tepida]	MSLAKSDSLNNALLAISQSLADRSQLALTLDAILAAARQLTFADHGIIYVLDQTGQALLPSVVHHNEHILAEHPWQPLTLESIDETDPFSFAIQNGEVVLINDLYQYNGYQCDEIYQNESILNRKSKNLLAWPLIDNEKNTVGLLVLFDLNVINDEASLTCFCQMAATNIRQAVWLEKYGYMIKELSEDNASLTRENNQLKQRKQSQYSGPIAESEVMLNALARLDKVLSLPVDVLIRGETGVGKEVIAKYIHENSNRSKQALIVQNCAAIPEQLLESELFGHKKGAFTGADKDKIGLFEAADGGTLFLDEIGDMPLLLQAKLLRVLQERKFRPIGGNKEISVDVRVLAATHANLMEKIKKNEFRADLFYRLNVFPITIPPLRERTEDIIPLSEHFIKL…
1	928	GC_00000020	conserved_T6SS	ATCC7744_cat	65173	36.6	38.2															MKPYLLLLPAALVVAGCSNQTSVPDPLAPYKNVHIIGNKKQSIGSFNYLSKDVDGYTDKQVIVYFNEIPFTSTFNLCADKGVYIANCKSTVSIFPSKNKGVIFNYDLNFYNGSYPARVGSMNILLPSTTTRKMDNLTQYTSAKFSEEQFLESETLEEATFILMKSS
1	964	GC_00000021	conserved_T6SS	ATCC7744_cat	65173	36.6	38.2	K11891	type VI secretion system protein ImpL									22.985	3.92e-69	AFJ27267	IcmF-like protein [Escherichia coli Xuzhou21]	MIKNTLARTPFILSTVISAFFALLLVGVYYLWFNQADLRLLWGMLGIIFSIYAIFNLTLYIKKRKNKSHQNIETEEDTLSMVLKPLLHKAGKKPVYLVLGNKGSGKNQFLNVSNAIKPMDKVKNVKNDFFEWSESDSAVYIKPNHRLTFQEISSNDSLLWDALINEVIKHKPRKPFAGCMLLIDFEFLIVHDDEQTDYTLNALLQRLESIKETTGATLPLYLIMTKLDKLEGFKEYIHFSPLKSSVEFLAIPLKDAKGAILDYFRDSYKNIVKVMESNALDSSSYTNNPDEKQTILAFPKQFELCEKEISRIIERLNELNQGTYSIDIREVFFSSSLQGGRKYNLLAKSCSNYFNLPIIASEHGQLTETPYFTRFLVDAKVLPESDYSAENQHYLKRIQ…
1	1000	GC_00000022	conserved_T6SS	ATCC7744_cat	65173	36.6	38.2	K11896	type VI secretion system protein ImpG									30.743	3.33e-90	WP_117580773	type VI secretion system baseplate subunit TssF [Enterobacter]	MSNSKYFQDELTYLKEAGSEFAKYHPKLTHFLSEGTFDPDVERLLEGFAFLTGRVREKIDDELPELTQSLISLLWPHYMRSVPSMCISELVPHSGSVTEKIIVERGAEMASEQVEGTQCQFRTCYDVALYPLSIQQIEQNNSRTNSSLHLTIAANNGLELSRIKLDTLRFHLHGEQHITRSLYLWLFRYLEYVELDVGGGYKHRLRADQVIPVGFGDDEGILPYSKNSFSGYRLLQEYFSLPDKFMFFDLKGLEWLGGIPQRSTVKISFAFSRALPSEVIVKNKHFKLHCTPSVNLFEKDGDPIRLDHQLNEYRVRPQSSNQEHYEVYSVESVESWSKAERCRKKLIEFESFEHQINQRDKRDFYKTKVSERINGRGLERYISFHSHNNQVSELGSETV…
1	1036	GC_00000023	conserved_T6SS	ATCC7744_cat	65173	36.6	38.2	K11910	type VI secretion system protein VasJ									23.459	2.36e-23	WP_119144555	type VI secretion system protein TssA [Pseudomonas reidholzensis]	MTSLNVELLLKPISEASPTGEESKYEFCYELMELEIKKFGSLFGETVDWKVVETNAIEVLTTYSKDLKAICYLVRALIERNGFIGLDEGLNLLKQNLVLFGTELFPQRKRARDGAMEWFVAQLETTLPKLDTSTTNWESVASYLQRINEISDQYHEAFSDSDVEFYLITSVLNGISQRVVGVSETNTNTSVKMTSEPEPLVEETTSAVTEVKTLSQVATKVPKTVNTVKQEVDIDTDFSSPSASKRTLKKVAEFMLHSDISTPLAYRLHRNCTWCEVDELPPHDNDKKTPLSLAVSQDQLSEYRDKAKQETEAEVIKRLERTLTDAPFWLTGHYLMFQMLTNLDHHEAAEAVKQETQYFISQLEGIELLTFANSTPFADEETLKWLSSNTTTTPVAVAA…
1	1072	GC_00000024	conserved_T6SS	ATCC7744_cat	65173	36.6	38.2	K11907	type VI secretion system protein VasG									45.504	0	WP_117580830	type VI secretion system ATPase TssH [Enterobacter]	MININLSSLIQRLHPITKVALEDAAALAVSERASEVQIEHFLLSLLERPNSDFDQLLAHFECSENLLRQAIKSTLENSHKSNGGKPVFSAMLIEWLQEAWLVSSLDLSETQIRSGALLLTLISNPLRYGQHGYSSLLENINPETLKRNFAELTSRSIESQVATSEQTHAREDGSALSKFTTDFTGKARKGEIDPVFCRDQEIRQIIDILARRRKNNPIAVGEPGVGKTAVVEGLALKIVQGEVPDCLKGVELYGLDMGLLQAGASVKGEFEKRLNAVLDEVKNSPTPIILFIDEAHTLVGGGNQAGGSDAANLLKPALARGEVKTIAATTWSEYKKYFEKDPALARRFQLVKLDEPSTEQAALIIRGLRAVYEKSHNVYVRDDAITAAATLSDRYISGR…
1	1108	GC_00000025	conserved_T6SS	ATCC7744_cat	65173	36.6	38.2	K11904	type VI secretion system secreted protein VgrG									37.276	3.31e-117	WP_002213876	type VI secretion system tip protein VgrG [Yersinia pestis]	MVSDIEFKFEVLGTEHEFRVESFNVVEELSKPFHVSLSLLSLDADITFDELIRKPALLSIFGQGVGTARQFHGVVNEVRYLGEGRRFSRYQITLVPQLWFLTQRQDCRIFQEKSVVDIVTEVLDGATVTDYRFDISALYPTKEYVLQYRESDSHFVQRLLAEHGLWYYFEHTTANHTMVIVDKNDAIAELENTPLNSSYVGPVIYQADGGGNADREHIFDLESINRVRTGHVTHTDYNYEQPRIPQKMESSGLIDTDLAFFDYPGRYIEPSQGLVRADELMAESVVDNYQIEAASNVMRLIPGYSFILDKHPRRALNRDYTILTVTHSGYDPQVHEDEANEMPTTYQNQFSCLPRDIEFKAPKIAAPVVDGPQTAVVVGPAGEEIYTDKLGRIKVQFHW…
1	1144	GC_00000026	conserved_T6SS	ATCC7744_cat	65173	36.6	38.2															MVRLQLTNSIEVTGAIDENSQAESLACVPRFGKVISLHPTMSDRIYVEFDGLATGSTALAKIGRLFRKSELKFAIESGLTCRIEFLNGDITLPVLTDIFFSLLDDDQPVILRAKSLIIEAENELIVRSGATQTKYSGRDGRVTTQAKYITSQAEKAQKIQGSTIAVN
1	1180	GC_00000027	conserved_T6SS	ATCC7744_cat	65173	36.6	38.2	K11911	type VI secretion system protein VasL									45.057	1.1e-123	WP_011105827	type VI secretion system ImpA family N-terminal domain-containing protein [Vibrio parahaemolyticus]	MLGLKFNMNLSDFARRPISIEMPSGINPNSLDDFSEIKREVNKLNTVTSKISWKHVFKLSKSILESESKDIRCACYYTVSATHIDGLKGLVNGLNALLDICVIYWHSGYPDVNKTIARMGAFEWLTEHAIKKQKTLKISPTDLVLIETGHKLTLKIEEELRSHYGNKSPSLGAIRRIFSQWIEEIQATKLSLEEQRLKKEAIEKQNNSGINVNVSLPPRDESKQTVQPTMTHTAKDKNIKPMVTISLAFIFILTLLFGHFLYADNQKSTLLINIQKADLTTINPLISQLENKEDDLKQYVKTALIKQALHLNKDWEVTSTKVDKINELETLNHSLKNLYPDSAAVKKLEYEFNQQRADFENEYSDIHQRFLKSRTIFANAKNHNSDENIVKAYSYSNSL…
1	1216	GC_00000028	conserved_T6SS	ATCC7744_cat	65173	36.6	38.2															MSIYQHQYILDSDIVVPTGMNTELAIAIARADIDRFATYEDGNEKYTVASLEFVDQTCLMTKVQETLNVLITPLLDRLHVSLKPLPLLLSVPQEISEHDLRNWIDESDFSDYLSNIKFSKNSGNAFLQECLNSLAEPDAIMCIAIDSLYEKKEALMSSRDAMSGTNPWGVLPSEGGAGMVLTKRNVLDTLKLIPQSKIVYSQFDWHSSDRRGCARLIRAASKHHDNLGPIYSDMTNQRAHTEDYGFAIGARSEVIPYAQQVTLTNEFWGTIGGGSGIATLATMNHLSSVGILSTAFLFDQNNTRSLFILNREK
1	1252	GC_00000029	conserved_T6SS	ATCC7744_cat	65173	36.6	38.2											30.366	7.25e-17	WP_138184353	serine/threonine protein kinase [Paenibacillus alvei]	MSELQGSTNDFINQLVVKAIEKKKKNEQTLANKLKPRLEHVLFSQFDVLETIESHNQKTTLYRLAKKDEPEKQICCKVLNSEQPEHVLEMFVAEATHLEVSQHPSIIDFIKLGNEFERPYFMYKWAEGESVAEKLTRHKYKSFRHDHIAWLIYQLAGALEYIHTKGICHLDIKPSNIIICEDDSIKLIDFGAAQYINDSRKYNEASLSYASPKYIESGKAVPQDDVYSMALLVCALFTGYSDNNDWKALLQQRKRPHTIPKTVWNLLRLVVTKPRTHGLTPISFAQALAHIDMNVMQGSHNAPLFTQLRNADLVLRKSSKYDVFRLGRFKYLEASLAACLCLITFTVLLKSFAFTVADNNAVSLSDTSSRIKPAQAATFLSQPPWEIENALDNNSSDVV…
1	1288	GC_00000030	conserved_T6SS	ATCC7744_cat	65173	36.6	38.2															MNRYRYLVDDVKKTLTDADKQQAIADIALAQEQLSSFSENMVNFLYTKAILAAETASFYIKQQYRFHQNGYPAKEIDYLTLLETQLSEIEKVFIALLRIHRGFVYVVYSEYPEVLAWLCLSKNIESQHDNDELTLLGISIIDQLDPELAMSLILRSNSNHIHKLLARFIEGGASKRELYYRCLVINQSVSVSLIKHWLEDKKLPEKMLHSYLALMNVGSSIEWLQELTNADDLLFENLILKEDRATWFRQQYSVDTISSETANTYSKLLTLKEFSLFDIEKEQAVIHFILSGDTELVPLIIEHLMQLDEVDAQLWCEGLFLVYGEEFPFSPSKLGNTIEWQDALHEIVEWQEQIEVVKSVPLRMGQKLTFDSSIRAMKSSELSSSLREWLWRELCIMSR…
1	1324	GC_00000031	conserved_T6SS	ATCC7744_cat	65173	36.6	38.2	K19304	murein DDendopeptidase [EC:3.4.24.]									34.199	1.13e-42	WP_116986330	murein DD-endopeptidase MepM, partial [Escherichia coli]	MKLKYLTFISINLAFIILSISLLYFSSNHSGITNASQISTSSQKNVSDKEKQKPDNLVINGTIKDSFFSSALNAGLTSKQIFSFTEALHYSVNFIDGIEDGTPYSIVLDKNTSHIRSFFYTENNRPHTIQLAENGIYYNELGVNLSSNKLILPTGNLFRISSHFSNKRKHPVVGIVQAHVGTDYATPIGTPVMSVSKGIVSKSEYHPLAGNFISIKHNNGITTRYLHLNDRYVNKGDHVYKGEIIGKTGNSGRTTGPHLHFEYIVNNIPQDFTKLHNDIEMPLNNKNQKKLLKCINLSKTLITKILKEV
1	1360	GC_00000032	other	ATCC7744_cat	65173	36.6	38.2															MKKILLLALFSITLMGCNDPESAAAEAAQLRAEQHPERTYVGEHNYYTMESSGDIQFTTKKDLKVMYQDFPRYFVEKAKEWPKEDLNDASSYDLPRFQFAWANSSSEDEYESGLKIWSMKTDGTDLRLVTDATIGFAAIRTLTRSPNNRYVAWAGTGGQKGVYDLKTGKVSNMHKFTSPLDMLWSEDSRYLYFDDAINSYARWDSETGEISEIDFQFSSFAKITDDTLVSLNVYGVYKLNLISNEGVLLKSSKSLPREQRKLDVRSISPTGRYAWGSNPSYGFFFDIEKGTVKQMTTDYTPAQILGKDAHFSALNSFAKVRVVDRVGDRVWSWRAFYYGALSGDAILYNGLANDGLWFRENK
1	1396	GC_00000033	other	ATCC7744_cat	65173	36.6	38.2							EFF01293	41.248	3.29e-153	NA					MHFNCKLIPSSSLSHKELEYILTPDEFVRLLSRGKNSQNIINQLPVQLRQSLSISASKSVQSLLFSLNQKLTKAEWIAVSTTVRKTGLSDTQLAQYPQLKKQIDRVETTQPAKFVKANFKPVTDDVPLVRNLSFTPVNPSPEHKISIEFVGQWPNNAASLLLAKSGEQKEKIAKPRADIHASHRSIATFKDLEPEPRNLYLTIPMNGTPQPLKLLLAENIQPVDKETEMDEWDTVLVPVVPMKRLSEEYSLHQIGYFYVIWNGKVWREITIDSNGYFCDLDIQHERQEPLPTRHVNINASEFFPEANMSFERFELYQEGQKVFSGELDVCEQSRVFNLVAEEVELKFVDFEHDEILLTTFESPIKNNASNERQAMSYPMPHVWLPYKLLGEVQADCYMY…
1	1429	GC_00000034	other	ATCC7744_cat	65173	36.6	38.2															MVCGDLISLEECLIYQYPKALPSYSDFMTQQGNPVALKGTGVATLGVASAVQKTAQSYAQGFATKGIGVFGDLSSQQIATSVAKNIWGKLTVEGVLPEPLTAGASFLFGLQSVKEARDAFTKAVKVTERVQRFNLTAPQTLERTVRKVFSNKTFMQNALKEIKENFQEHGASVSTRNLAASWFEGSAYTKLAKGLPIIDTIGSMYDFYQLVDKQGKLEKQSAKEQDNFDSAATDYLQKIVMVKAEADWAQQLLDATSILNNKGKEQIARIVSKNSQVIIHINFKFNSWELPNTGTTLRSDIDMVCERIAELLKAHPDYRIQIEGHAGRIGSNKANNLVAFNRADEIKNAIIIKADDKTLSERIITLSHGNTQPMSADNAKVDMSETGDDSALAIDRRVE…
1	1430	GC_00000034	other	ATCC7744_cat	65173	36.6	38.2															MMSALTTYDHGIYLLGVYFDKTEDEQGNESYSAWHQSSDVTEADLRNVRPISFTPVLVDDAKKPVLWGTNKDGLLCQLGYFDENTVPETVAKKQTFLRHKQPLTVSELNLDKPYSLMFPPLNVIGQLAETHSSVKALNDSLKDIYSNKLKLKNKKPIEFTINKIKVSQLAEPYKGLDKPLTDEQNDYNAWYNKIIASEVTEIQGIITPVFHSLGVVFSSDLYVGAEISLIKVKPKQDNSGESEDVLATSFVTKNE
1	1462	GC_00000035	other	ATCC7744_cat	65173	36.6	38.2															MAIQFTSIVESGRFKDRKFARLVLNTIILIIVLMVMTLEILDDYDILDIFNDIQDNIIAFTTLCYMSALYSYGYQLPLFKHQWQVFLILYLTLAQAVYVLGYLTYTQYDQHSIIYLLSYCLFWSLFYGYLIYTINNLKNDIK
1	1740	GC_00000049	other	ATCC7744_cat	65173	36.6	38.2															MNKYNDEYYIVFENYNNETLYLSPLQKTFDRNYTYTKINMGQEPLFFENAYKDKDLLNSIQRPIKNAHLNLNYPIISNKIKDDINNFEIDNFQLYPTVIIDDNGDFYDNFWFFNIYNKIDALNLKHCIIDDYDEDDKRHDIDKYYLDVNKLNSIQEEKRLIFIPEKASGAPVFVHKKIVDIFNKHKVDTLKFIKVSEWEMGKQF
1	1751	GC_00000050	other	ATCC7744_cat	65173	36.6	38.2															MEALTTQSKDKLSLSFLKHKFSHHNQNKPTCKFDIEKTPLLKSQNNNENLTFMSKKQTSNILQSQFQELL
1	1783	GC_00000053	other	ATCC7744_cat	65173	36.6	38.2							EFF01536	44.28	5.54e-117	Toxin PAAR-like domain					MGVTVAANGLSVVHQGSGGEANATLPDVCLTKVGKPIVPIPYGNNAKSADLAKGTTTITMDGGNPVAIKGSTFSKSTGDAGGDKKGVASGTIEAEAEFISASPTVKFEGKGVCRLSDQMTMNKANTMCLGGAQNPSVSVTAEEEGTYTVDVSCFYPDGSAFKNAVFDIVDPNNSVLGSGTLSTNGTGSASGIPAGEIRIIYQESADDFIVQSPRSVNPHYREKLTDDVFFDLAAQGKQTFWQPARMQTVVETWGTMRKTLSSDPYFYNIVELETKSHFNHQHSNYSFSTLAEYILANVDSKDDSCIPKLIAQTLPLILDEGEILSTLLLLPKHETTNHFLAYMRARGKGNPHTYLQNYEWSKAKQLLNNELEALLTEIKLRIQSLGSEADRLNYSYLSK…
1	1793	GC_00000054	other	ATCC7744_cat	65173	36.6	38.2							EFF01800	40.376	2.04e-45	Toxin PAAR-like domain					MSIIEKAISKEEIDFINGTVEKKGYRKRWISKVKKISNHPFNHGIHMDTHHLISAEAVTISGLGSLLEKKGYDINALNNLVGFPATLPGACQLHCQLHRGDHIFSQPKEEPYHKYVSTQIMDLIQDIQSCYGKTKKRETNHEIHSEVMDPVSRKTLKRINKFKLPLTDIYLNFKKGNCGCAGSGNITEARISKNICINRMHIGIDYRYPEKGNTIKGNKKIITFNQQNWEPKVGQ
1	77	GC_00000001	flanking	emors_1_1_cat	81376	37	38.2											47.917	1.61e-27	RGC81918	PTS fructose-like transporter subunit IIB [Hungatella hathewayi]	MKIVAVTACPTGIAHTYMAADVLKKAAAKLGVSIKVETQGAMGVENVLTPVDIVSADLVIIASDIEIEDKNRFLGINSKQFPIETILTDVEGILKKYLF
1	78	GC_00000001	flanking	emors_1_1_cat	81376	37	38.2	K11203	fructoselike PTS system EIIC or EIIBC or EIIABC component									61.746	0	WP_117709256	PTS fructose transporter subunit EIIC [Fusobacterium mortiferum]	MDITSLINANVICLDLTSTSKEDILQEMVQILDDAGKLSNKTQFLSDVWAREEIGNTGFEDGIAIPHAKSSAVLTPSVAIGISRTGIDYGAEDGEPSDIFFMLASTDGDDNQHIEALAQISSRLIEDGFTNKLKKANSKEEILDLFTDIIQPNTESSDIENTQPPTEKSELTRKLGRTKEHLLFGTSHMIPFIVAGGVLLSLSVMISGQGAVPTEGILADIAQMGIAGLTLFTAVLGGYIAYSIADKPGLAPGMIGSWIAVQQYNTGFLGAIIIGFFAGFVVRSLKKIKLPESMASLGSIFIYPLVGTFLTCAAVMWVIGAPISNAMAALNEWLASMAGSGKIALGAILGAMAAFDMGGPINKVATLFAQTQVNTQPWLMGGVGIAICTPPLGMALATF…
1	176	GC_00000002	flanking	emors_1_1_cat	81376	37	38.2	K07001	NTE family protein									31.25	4.71e-101	WP_119143698	patatin-like phospholipase family protein [Pseudomonas reidholzensis]	MRHVFRLNLWFVFLATFLFTPYLYAEPIKEPSRPKIALVLAGGGAKGAAHIGVLKALEELNIPIDIITGTSMGAYVGGLYATGKSASEIEAYLHTVDWYSGYQDEVGREEKNIRDKKYEDRFAINPSLGIRKEGVKSPKSAIQGQNMLKILRETSGNPVFVASFDDFPIRYRSVATDIVSMEEVVIDHGLLVDAMMASMSVPGALPPYEFEDRLLIDGGVTNNMPVELAKEMGADIVIAVDISSNYMTKEQIGSLFDVASQLTNFMVKRSTQEQAEFLTDKDILLQPRVGDIETTDFSSMPRAYQEGYDTVMTLKSRLKSLAVTPNEYAQYRNKIKQQSANVRLAQGTIIDKVEVENRSHYESDKLERFIQFEQGTSLNSDYIEDKIHALYATNRFETI…
1	245	GC_00000003	flanking	emors_1_1_cat	81376	37	38.2											30.097	1.17e-08	WP_116986099	phosphoenolpyruvate--protein phosphotransferase, partial [Escherichia coli]	MELNTIDYRITFFVKDQGLPPQVASQLTRLAKKFKSLVYIDNITQNRSTNAESSLGLLQVGLCPGDFCQLITVGMDAEWANFVLTDLLSSTFDFVASDKLCDFSETITNTYPQLTPQCEVDFHYVKAQAVLSKFEILKGLSQLIYPKESDELLLALIKREERSSTAMAKQIALPHVISPYVEKPTIAIIRSDYPVDWASKMGDVNVIIALVLPEKPTKEMIMAATYLTRSLLSEDFSQRLVHTRQPKGLQALILYAMCQLL
1	313	GC_00000004	flanking	emors_1_1_cat	81376	37	38.2	K01809	mannose6phosphate isomerase [EC:5.3.1.8]	M00114	Pathway modules; Carbohydrate metabolism; Other carbohydrate metabolism	M00114	Ascorbate biosynthesis, plants, fructose6P > ascorbate					62.148	4e-174	WP_005478337	mannose-6-phosphate isomerase, class I [Vibrio parahaemolyticus]	MNALKPQTFYPMTNVIQDYAWGSHTSIEALFDIKNNTGKPQAELWMGAHPNGCSAVTVNGDSILLSDLINQDKEAFLSKTTADAFGELPYLFKVLAAEKALSIQVHPNKQQAVDGFEKEEKTGIALTAFNRNYKDNNHKPELVYALTDYKAMNGFRDYQEIVSLFSAMQLPTIASYVDDLAQEPNSNGLQRFFKAILSLENETKERAVAELLDYASSSTDELFVLLQDLAIQYPNDVGLFAPLMLNVITLKPGEAMFLNACTPHAYIHGTGLEIMANSDNVLRAGLTPKYMDIDELMSCTEFVSQPLSSLLTQPNTVDGGMSYPIPVNDFKFSVFTATDALTLETNSAEILFAIDSDLTLTHENGDSVTVAKGHSVFVPAYAKRYSLTSSGNVARAYN
1	379	GC_00000005	conserved_T6SS	emors_1_1_cat	81376	37	38.2											50	4.71e-11	P96156	Chitodextrinase; AltName: Full=Endo-chitodextinase; Flags: Precursor	MIKLNKITAAITSVMFSGYLYAADASAASNLITFVPGETKVQNGDMVSFNGDCFVAKNNPGVWESPTADSWFWDVAECSGEPNPGPGPNPGPNPTPDPDLGDIIPFIPGKTQVENGDVVSYENQCFIAQNNPGVWETPSASSWFWTLTECSDEPVNPEPEVTELSILAPIAGQVLTANEAISINAHVDGNLAAKVEFWANNTKLAEKTVNQNNTQYSQTWTPSEEGNATINVFVFDKNNQKIEQKSVSVTVKAEVTEDFVAPVVKFVTPANGSTINVTESLSISVNATDADNDLATLVVKANNKEICSFDAANTDTFSCDWQPTQAGNVTLNAIATDVQDLSSTATVKITVEEDVVEPPVEPPVTPGDLCKDFNVYPDWTRGDHATGGDIMVHDNIAYS…
1	432	GC_00000006	conserved_T6SS	emors_1_1_cat	81376	37	38.2	K11892	type VI secretion system protein ImpK									24.8	1.8e-08	WP_010910863	type VI secretion system protein TssL, long form [Mesorhizobium japonicum]	MSYVEDDVTVVLFQPEPGKPMEVMPAPDLSRNISVSELDISSMGINPLVDQFSWLIASLSCMSSIPWLDDPMPFREQVAREIRKGERMLNEMEVDRASILVIRYCLCAAMDESVCRQEWGANSNWSQNSLLSEFHNETSGGDKFFVILDRLKADPRKYRHVIEFLYLLLQLGFKGKYGRAERGAESLTEIGNTIYRLVRDERLAEQEKVALVDVKSKYLKKPLKRVLPPKLILGVSALLFAAMYAATYLVIDVRFQKLLSLYQ
1	471	GC_00000007	conserved_T6SS	emors_1_1_cat	81376	37	38.2											41.849	2.55e-99	WP_011105819	hypothetical protein [Vibrio parahaemolyticus]	MTIFIVIFTIYMVYVSRCHLFTNKYNACSLITTTRFYIFMRIFSFLKLFAGLGLILLISSCGGESKDTSPPKRETTSVSGILFDAPIAGARVVLWEYANGAIGKKLGETRTSSKGDYSMEVNSGSMPVLLQAFGGAYTDPATGEVVYEGDGKTLKFESTAYFYENKANRIMLTPLSLISKGLADYKIHKLGMDAKGAIDSANSTISNMYGFDVITVEPIDIVKGGQSAYVTAGHQYGAYLTAYSVFSSDLIKKYPASDSSSIYTSFTLSDIMYRDISADGQLDGYETDNISGLDKKISFGKESVSVETYTNILSQYILITVNNNRLNVSGTNPNDYKPFASKVNKLGTTPETMTVFPPRTEVPIDDTEPTVERSDKDVLVRLDSLDLLVKDNVGTKSLR…
1	510	GC_00000008	conserved_T6SS	emors_1_1_cat	81376	37	38.2	K11906	type VI secretion system protein VasD									26.984	5.13e-15	WP_010910850	type VI secretion system lipoprotein TssJ [Mesorhizobium]	MQKLLTFSLIFLLSGCTMWDQFKESTGITPETSSIELIITADKVLNVREGGQSSPVILRIHELNSPVLFRNLDFFALFENDKDALGDEYIKRYEYQIQPGDVVHETLVLDPATRAIGFSVAFRDINGSSWRKVELIEEKSEYFLKLNLKESELSSNNTRGIEQIYF
1	548	GC_00000009	conserved_T6SS	emors_1_1_cat	81376	37	38.2	K11893	type VI secretion system protein ImpJ									33.333	2.23e-84	WP_005463797	type VI secretion system baseplate subunit TssK [Vibrio parahaemolyticus]	MSLYNPVVWQDGMFMKPQHFQQLDRFQGKQSGMLSGFESPLHWGIKRIEINTELLALGKIGITHAEGILQDRTPFDLPLHASLPEVKDVDASVANKVLYLCCPLPSERSELFGTSKDGARYSIHTQDAVDACYDSEEIANITIGKLNFCLMYEDEDKSAYTSIPILKISEVKPDGSIILDNAYIPTCIDINASTVLKKFTTEFASMLRHRAESIVQRLGVVDQQGVSSVSDFMLLQALNRYEPLFWHFANIEGVHPEAFYRVLLQAEGELATLCSSSRRPQEFVAYNHGNLTSCLSTILHNSKVTLSVMSEQRAIPLPLKEQGYGIRIAPISDRSIVESTTFILAVKADVTLDILHTQFVSQTKIGSIDNIRELINLQLPGINIKPMPVVPRALPYHAG…
1	586	GC_00000010	conserved_T6SS	emors_1_1_cat	81376	37	38.2											66.5	6.66e-98	WP_011105828	hypothetical protein [Vibrio parahaemolyticus]	MAKPIQLGFMALIMACSLPAFAKGERYGIAANFKTIESTEYEQGMSGELSTISYGLVHTRPIDENNNRWRWLFGFNYLSDYIEAPANGVYQEVTNYEFRIVPQYALGNWWAFTPYVGAGLSLGYSQYGNRWKVDDEGYKYGNQLEDIDQFEVGAVLSFGTVIKLGSNPDAHLQIIPQASYIQPIYNDGLGGLELSVSLLF
1	624	GC_00000011	conserved_T6SS	emors_1_1_cat	81376	37	38.2											39.13	0.000438	WP_117539334	FHA domain-containing protein [Coprococcus catus]	MHLNQLTLFITKSPEEYTGSKHIEMPESGGSLGRNPSNTVSLVDHNRFISGSHCLISIYGDTYYLSDVSTNGTLVNGNKLLKNQPISLYDGDTIVLGRYEISVGLEKLSNSVNIAADISEETDSTDPLVNLAEYTPDEEKDKGNIADLFKETRIDKVDSSDPVAHLNFITQTNNDDHLLHGNEKKQEQKIKEPIHTRQLLDDSDSVHSEFDVPNLIPEDWFSNDFTDTSIPPVQVNEPIATHSEPESMMHSFTDSTPETIISSASEISSVTEQLAWEDVTQTIQPSVSTTEPKSDEFFIAPSTSMDVYPSQSIETSFNSKMSDDAASAFYKGLGMSASQIEQTDEQFFQQMGNCLRLCINNLQKELSELKAIKNNEQDDSMTNIVELMLSLNHQQLLSP…
1	661	GC_00000012	conserved_T6SS	emors_1_1_cat	81376	37	38.2											30.882	1.68e-20	WP_116949140	Lrp/AsnC family transcriptional regulator [Jiangella endophytica]	MSNMNLQGLDKLDRRIISNLLSNGRESIANLSRNVGLSRTAVAERINRLEKTGIIKGYTAQIRMGNKDENASSYLLISCNKGQKDSVSDGLKEIPEVKMTSIVGGTYDIICLIEAPDLHRIHYLCSEIESLSGIKEVKNTIVLHQPVCR
1	697	GC_00000013	conserved_T6SS	emors_1_1_cat	81376	37	38.2	K11901	type VI secretion system protein ImpB									40	2.67e-32	WP_117580760	type VI secretion system contractile sheath small subunit [Enterobacter]	MSRDGSVAPKERINIRYVPATGDVQEDVELPLSMMVVGDFTARTDETPIEDRTPINIDKDNFNDVMEGYSPNVKVNVDNKLSDEEGAQLGVDLTFNSMKDFSPEAIAKSVPELNGLLELREALVALKGPLGNVPAFRKKIAAVLQDEEARQKLLEELNIGSAKEEAKAE
1	733	GC_00000014	conserved_T6SS	emors_1_1_cat	81376	37	38.2	K11905	type VI secretion system protein													MEKGYRLLERIELGEPKNCYEKVVSHKHLIESIHLHLADLLNTHAGNAMIDNDYGLPDFNDVLSNNTNLVRNIQQNIKASIEKFEPRMRNVEVHYRHDNNNPLQLGFGIGGEVIHNGGKVPMAINIFMGVDGQFNV
1	769	GC_00000015	conserved_T6SS	emors_1_1_cat	81376	37	38.2	K11900	type VI secretion system protein ImpC									60.288	0	WP_117611541	type VI secretion system contractile sheath large subunit [Escherichia coli]	MTAEAQAPEQEAALVESGSLLDSILNETRLKPSDEGFDVAKRGVEAFIGELLSTNTSDKVDQSLVDLMISEIDQKLSKQVDAILHNEEVQAIESTWRGLKYLVDHTDFRENIQIELISAKKDEVLDDFEDAPEVVKSGLYKQIYTREYGQFGGKPVGAVICDFQMSASSPDIKLMEYMANVGAMSHAPFITSASAKFFGLDSYEELPNLKDLKSVFEGPQYTKWRGFREHEDARYVGLCTSRMMLRTPYSVEDNPIKAFDYNEHVKDGHDNYLWGNSAYAMASKISESFAKYRWCPNIIGPQSGGTVSDLPVYNYESMGQIETKIPTEILISDRREYELAEEGFIALTMRKGSDNAAFFSANSVQKAKVFPNTPEGQQAEMNYKLGIQLPYMFIINRLA…
1	805	GC_00000016	conserved_T6SS	emors_1_1_cat	81376	37	38.2	K11903	type VI secretion system secreted protein Hcp									52.326	6.63e-65	WP_137712216	Hcp family type VI secretion system effector [Brenneria rubrifaciens]	MPTPAYMSIKGETQGDITKDAYSADSVGNVWQEAHVDEFLVQELDHVLTVPRDPQSGQPTGQRVHRPVVVTKQQDRCSPLLFNSLVSGEKLPECNIKFYRTSTSGKQEHYYTIKLIDALLVDMQTRMAHCQDAAMSDRVTEEVLKFTYRAIEVTHETCGTAGNDDWRTPREA
1	841	GC_00000017	conserved_T6SS	emors_1_1_cat	81376	37	38.2											45.455	5.7e-08	WP_117031792	DUF2169 domain-containing protein, partial [Klebsiella pneumoniae]	MQLWDIDSESPFTLKGRFQRDSEGHEVWVLSMKRAWTFLDGSWSEEVDNLELNDDPIYLGEPGFSAMVADHDFPIYKKNTDVLIYGKARSYAKKPVHSQLCRVLIDEHIDKTLKVVGERHWVDHSGSITVSTTQSFIERDIDYSNAIGGDERNRIGGGAAETNVELLKAKVPSIFYPDQNWQASSKKVKVAGFGPMPPFFHDRAKWAGTFDEKWFEERRPVWPIDFDDRFYQSAPQDQQCNGYLQGGERLMVSGFCHNDALSFRIPSEKFQAVAVFNGKEEKINMPMYTLWIDTENKRIEATYTAAFPCQNREHLLTSSYLVELP
1	877	GC_00000018	conserved_T6SS	emors_1_1_cat	81376	37	38.2	K11895	type VI secretion system protein ImpH									32.344	1.67e-54	WP_000348794	type VI secretion system baseplate subunit TssG [Escherichia coli]	MIQYIINKPCDYSFFQAVSLLEKHYQNLSGIEYKAIGENQYVKNEYIQFSVSPKLSFPKSDIEFITEFERNDASYTQIEVNFMGLHGVSSPLPASYTEKLAGRDPDDNPVKEFFDFFHHRYISMLYRVWKKYRYHIQYKSDAKDPFSGRLLHLVGLSSVIQESSEVDLDRAKLLSYVNQLSTRTRSPKLVSGIVSHYFTLSNVYIEEWVYRRITIAASQRNCLNRKNCQLGGDFHLGQSMADLTGKFNLCIDDIDFDTYVKFLPGGALHETLIGLMKFILCDPMAWDLKLTVRNKSLPINQLGDGLGNELGQTFWLGAAKGEETKIKIVGSN
1	913	GC_00000019	conserved_T6SS	emors_1_1_cat	81376	37	38.2	K11914	sigma54 dependent transcriptional regulator									41.463	2.36e-77	WP_126397535	sigma 54-interacting transcriptional regulator [Blastochloris tepida]	MSLAKSDSLNNALLAISQSLADRSQLALTLDAILAAARQLTFADHGIIYVLDQTGQALLPSVVHHNEHILAEHPWQPLTLESIDETDPFSFAIQNGEVVLINDLYQYNGYQCDEIYQNESILNRKSKNLLAWPLIDNEKNTVGLLVLFDLNVINDEASLTCFCQMAATNIRQAVWLEKYGYMIKELSEDNASLTRENNQLKQRKQSQYSGPIAESEVMLNALARLDKVLSLPVDVLIRGETGVGKEVIAKYIHENSNRSKQALIVQNCAAIPEQLLESELFGHKKGAFTGADKDKIGLFEAADGGTLFLDEIGDMPLLLQAKLLRVLQERKFRPIGGNKEISVDVRVLAATHANLMEKIKKNEFRADLFYRLNVFPITIPPLRERTEDIIPLSEHFIKL…
1	949	GC_00000020	conserved_T6SS	emors_1_1_cat	81376	37	38.2															MKPYLLLLPAALVVAGCSNQTSVPDPLAPYKNVHIIGNKKQSIGSFNYLSKDVDGYTDKQVIVYFNEIPFTSTFNLCADKGVYIANCKSTVSIFPSKNKGVIFNYDLNFYNGSYPARVGSMNILLPSTTTRKMDNLTQYTSAKFSEEQFLESETLEEATFILMKSS
1	985	GC_00000021	conserved_T6SS	emors_1_1_cat	81376	37	38.2	K11891	type VI secretion system protein ImpL									22.863	2.4e-67	AFJ27267	IcmF-like protein [Escherichia coli Xuzhou21]	MIKNTLARTPFILSTVISAFFALLLVGVYYLWFNQADLRLLWGMLGIIFSIFTIFNLTLYIKKRKNKSHQNIETEEDTLSMVLKPLLHKAGKKPVYLVLGNKGSGKNQFLNVSNAIKPMDKVKNVKNDFFEWSESDSAVYIKPNHRLTFQEISSNDSLLWDALINEVIKHKPRKPFAGCMLLIDFEFLIVHDDEQTDYTLNALLQRLESIKETTGATLPLYLIMTKLDKLEGFKEYIHFSPLKSSVEFLAIPLKDAKGAILDYFRDSYKNIVKVMESNALDSSSYTNNPDEKQTILAFPKQFELCEKEISRIIERLNELNQGTYSIDIREVFFSSSLQGGRKYNLLAKSCSNYFNLPIIASEHGQLTETPYFTRFLVDAKVLPESDYSAENQHYLKRIQ…
1	1021	GC_00000022	conserved_T6SS	emors_1_1_cat	81376	37	38.2	K11896	type VI secretion system protein ImpG									32.241	4.4e-90	WP_117681754	type VI secretion system baseplate subunit TssF [Klebsiella pneumoniae]	MSNSKYFQDELTYLKEAGSEFAKYHPKLTHFLSEGTFDPDVERLLEGFAFLTGRVREKIDDELPELTQSLISLLWPHYMRSVPSMCISELVPHSGSVTEKIIVERGAEMASEQVEGTQCQFRTCYDVALYPLSIQQIEQNNSRTNSSLHLTIAANNGLELSRIKLDILRFHLHGEQHITRSLYLWLFRYLEYVELDVGGGYKHRLRADQVVPVGFGDDEGILPYSKNSFSGYRLLQEYFSLPDKFMFFDLKGLEWLGGIPQRSTVKISFAFSRALPSEVIVKNKHFKLHCTPSVNLFEKDGDPIRLDHQLNEYKVRPQSSNQEHYEVYSVESVESWSKAERCRKKLIEFESFEHQINQRDKRDFYKTKVSERINGRGLERYISFHSHNNQVSELGSETV…
1	1057	GC_00000023	conserved_T6SS	emors_1_1_cat	81376	37	38.2	K11910	type VI secretion system protein VasJ									24.063	2.02e-25	WP_119144555	type VI secretion system protein TssA [Pseudomonas reidholzensis]	MASLNFESLLKPISEVAPTGEESKYEFCYELMELEIKKFGSLFGETVDWKVVETNAIEVLTTYSKDLKAICYLIRALIERNGFIGLDEGLNLLKQSLVLFGTDLFPQRKRARDGAMEWFVAQLETTLPKLDTSTTNWESVASYLQRINEISDQYHEAFSDSDVEFYLITSVLNGISQRVVGVSETNTNTSVKMTSEPEPLVEETTSAVTEVKTLSQVATKVPKTVNTVKQEVDIDTDFSSPSASKRTLKKVAEFMLHSDISTPLAYRLHRNCTWCEVDELPPHDNDKKTPLSLAVSQDQLSEYRDKAKQETESEVIKRLERTLTDAPFWLTGHYLMFQMLTNLDHHEAAEAVKQETQYFISQLEGIELLTFANSTPFADEETLKWLSSNTTTTPVAVAA…
1	1093	GC_00000024	conserved_T6SS	emors_1_1_cat	81376	37	38.2	K11907	type VI secretion system protein VasG									45.614	0	WP_117580830	type VI secretion system ATPase TssH [Enterobacter]	MININLSSLIQRLHPITKVALEDAAALAVSERASEVQIEHFLLSLLERPNSDFDQLLAHFECSENLLRQAIKSTLENSHKSNGGKPVFSAMLIEWLQEAWLVSSLDLSETQIRSGALLLTLISNPLRYGQHGYSSLLENINPETLKRNFAELTSRSIESQVATSEQTHAREDGSALSKFTTDFTGKARKGEIDPVFCRDQEIRQIIDILARRRKNNPIAVGEPGVGKTAVVEGLALKIVQGEVPDCLKGVELYGLDMGLLQAGASVKGEFEKRLNAVLDEVKNSPTPIILFIDEAHTLVGGGNQAGGSDAANLLKPALARGEVKTIAATTWSEYKKYFEKDPALARRFQLVKLDEPSTEQAALIIRGLRTVYEKSHNVYVRDDAITAAATLSDRYISGR…
1	1129	GC_00000025	conserved_T6SS	emors_1_1_cat	81376	37	38.2	K11904	type VI secretion system secreted protein VgrG									37.455	1.45e-117	WP_002213876	type VI secretion system tip protein VgrG [Yersinia pestis]	MVSDIEFKFEVLGTEHEFRVESFNVVEELSKPFHVSLSLLSLDADITFDELIRKPALLSIFGQGVATARQFHGVVNEVRYLGEGRRFSRYQITLVPQLWFLTQRQDCRIFQEKSVVDIVTEVLDGAAVTDYRFDISALYPTKEYVLQYRESDSHFVQRLLAEHGLWYYFEHTTANHTMVIVDKNDAIAELENTPLNSSYVGPVIYQADGGGNADREHIFDLESINRVRTGHVTHTDYNYEQPRIPQKMESSGLIDTDLAFFDYPGRYIEPSQGLVRADELMAESVVDNYQIEAASNVMRLIPGYSFILDKHPRRALNRDYTILTVTHSGYDPQVHEDEANEMPTTYQNQFSCLPSDIEFKAPKIAAPVVDGPQTAVVVGPAGEEIYTDKLGRIKVQFHW…
1	1165	GC_00000026	conserved_T6SS	emors_1_1_cat	81376	37	38.2															MVRLQLTNSIEVAGAIDENSQAESLACVPRFGKVISLHPTMPDRIYVEFDGLATGSTALAKIGRLFRKSELEFAIESGLTCRIEFLNGDITLPVLTDIFFSLLDDDQPVILRAKSLIIEAENELIVRSGATQTKYSGRDGRVTTQAKYITSQAEKAQKIQGSTIAVN
1	1201	GC_00000027	conserved_T6SS	emors_1_1_cat	81376	37	38.2	K11911	type VI secretion system protein VasL									45.287	3.99e-124	WP_011105827	type VI secretion system ImpA family N-terminal domain-containing protein [Vibrio parahaemolyticus]	MLGLKFNMNLSDFARRPISIEMPSGINPNSLDDFSEIKREVNKLNTVTSKISWKHVFKLSKSILETESKDIRCACYYTVSATHIDGLKGLVNGLNALLDICVIYWHSGYPDVNKTTARMGAFEWLTEHTIKKQKTLKISPTDLVLIETGHKLTLKIEEELRSHYGNKSPSLGAIRRIFSQWIEEIQTTKLSLEEQRLKKEAIEKQNNSGINVNVSLPPRDESKKTAQPTMTHTEKDKNIKPMVTISLAFIFILTLLFGHFLYADNQKSTLLINIQKADLTTINPLISQLENKEDDLKQYVKTALIKQALHLNKDWEVTSTKVDKINELETLNHSLKNLYSDSAAVKKLEYEFNQQRADFENEYSDIHRRFLKSRTIFANAKNHNSDENIVKAYSYSNSL…
1	1237	GC_00000028	conserved_T6SS	emors_1_1_cat	81376	37	38.2															MSIYQHQYILDSDIVVPTGMNTELAIAIARADIDRFATFEDSNEKYTVASLEFVDQTCLMTKVQETLNVLITPLLDRLHISLKPLPLLLSVPQEISEHDLRNWIDESDFSDYLSNIKFSKNSGNAFLQECLNSLAEPDAIMCIAIDSLYEKKEALMSSRDAMSGTNPWGVLPSEGGAGMVLTKRNVLDTLKLIPQSKIVYSQFDWHSSDRRGCARLIRAASKHHDNLGPIYSDMTNQRAHTEDYGFAIGARSEVLPYAQQVTLTNEFWGTIGGGSGIATLATMNHLSTVGVLSTAFLFDQNNTRSLFILNREK
1	1273	GC_00000029	conserved_T6SS	emors_1_1_cat	81376	37	38.2											30.526	1.93e-17	WP_138184353	serine/threonine protein kinase [Paenibacillus alvei]	MSELQGSTNDFINQLVVKAIEKKKKNEQTLANKLKPRLEHVLFSQFDVLETIESHNQKTTLYRLAKKDEPEKQICCKVLNSEQPEHVQEMFVAEATHLEVAQHPSIIDFIKLGNEFERPYFMYKWAEGESVAEKLTRHKYKSFRHDHIAWLIYQLAGALEYIHTKGICHLDIKPSNIIICEDDSIKLIDFGAAQYINDSRKYNEASLSYASPKYIESGKAVPQDDVYSMALLVCALFTGYSDNNDWKALLQQRKRPHTIPKTVWNLLRLVVTKPRTHGLTPISFAQALAHIDMNVMQGSHNAPLFTQLRNADLVLRKSSKYDVFRLGRFKYLEASLAACLCLITFTVLLKSFAFTVADNNAVSLSDTSSRIKPAQAATFLSQPPWEIENALDNNSSDVV…
1	1309	GC_00000030	conserved_T6SS	emors_1_1_cat	81376	37	38.2															MNRYRYLVDDVKKTLTDADKQQAIADIALAQEQLSSFSENMVNFLYTKAILAAETASFYIKQQYRFHQNGYPAKEIDYLTLLETQLSEIEKVFIALLRIHRGFVYVVYSEYPEVLAWLCLSKNIESQHDNDELTLLGISIIDQLDPELAMPLILRSNSNHIHKLLARFIEGGASKRELYYRCLVINQSVSVSLIKHWLEDKKLPEKMLHSYLALMNVGSSIEWLQELTNVDDLLFENLILKEDRATWFRQQYSVDTISSETANTYSKLLTLKEFSLFDIEKEQAVIHFILSGDTELVPLIIEHLMQLDEVDAQLWCEGLFLVYGEEFPFLPSKLGNTIEWQDALHEIVEWQEQIEVVKSVPLRMGQKLTFDSSIRAMKSAELSSSLREWLWRELCIMSR…
1	1345	GC_00000031	conserved_T6SS	emors_1_1_cat	81376	37	38.2	K19304	murein DDendopeptidase [EC:3.4.24.]									34.529	7.69e-41	WP_116986330	murein DD-endopeptidase MepM, partial [Escherichia coli]	MKLKYLTFISINLAFIILSISLLYFSSNHSSVINGSQLSTSPQKNVFDEKKQKPDNLVINGTINDSFFSSALNAGLTSKQIFSFTEALHNSVNFIDGIEDGTPYSIVLDKDTSHIRSFFYTENNRLHTIQLANNGSYYNELGVNLSSNKLILPTGNLFRISSHFSKERKHPIVGIVQAHVGTDYATPIGTPVMSVSKGIVSRSEYHPLAGNFISIKHNNGITTRYLHLNDRYVNKGDHVYKGEIIGKTGNSGRTTGPHLHFEYIVNNIPQDFTKLHNDIEMPLNNKNQKKLLKCINLSKTLITKILKEA
1	1379	GC_00000032	other	emors_1_1_cat	81376	37	38.2															MKKILLLALFSITLMGCNDPESAAAEAAQLRAEQHPDRTYVGENNYYTMESSGDIQFTTKKDLKIMYQDFPRYFIEKAKEWPKEDLNDASSYDLPRFQFAWANSSSKDEYESGIKIWSMKTDGTDLRLVTDVTVELVNGIKNLTRSPNNRYAAWADLGGYKTVYDIKTGKVVELSISMSPLAMLWSEDSRYLYFERARDLFSRWDSVTGEVSKVDFDVRTTAVNFGGKRTTVLDFGVLVEDANTNEEINWIGVDRSLSMDERSLDVTSIDPEGRYAWGSNPSFGFFFDIEKGTVKQMTTDYTPAQILGKNAHFSALDSFAKVRIVDRVGDRVWSWRAFYYGALSGDAILYNGLANNGLWFKGSK
1	1414	GC_00000033	other	emors_1_1_cat	81376	37	38.2							EFF01293	41.248	2.22e-151	NA					MHFNCKLILSSSLSHKELEYILTPDEYIRLLSREKNSQSIINQLPVQLRQPLSISASKSVQSLLFSLNQKLTKAEWIAVSTTVRKTGLSDTQLAQYPQLKKQIDRVETTQPAKFVKANFKPVTDDVPLVRNLSFTPVNPSPEHKISIEFAGQWPNNAASLLLAKSGEQKEKIAKPRADIHASHRSIATFKDLEPEPRNLYLTIPMNGTPQPLKLLLAENIQPVEKEIEMDEWDTVLVPVVPMKKLGEEYSLHQIGYFYVIWNGKVWREITIDSNGYFCDLDIQHERQEPLPTRHVNINASEFFPEANMSFEKFELYQEGQKVFSGELDVCEQSRVFNLVAEEVELKFVDFEHDEILLTTFESPIKNNASNERQAMSYPMPHVWLPYKLLGEVQADCYVY…
1	1447	GC_00000034	other	emors_1_1_cat	81376	37	38.2															MSALKTYDHGVYLLGAYFDLHDNGRTKEFRTWHQSSDLTKEADLRNVRPIPFTPVLVDDAVKPVLWGSNKDGLLCQLGYFDENTVPETVAKKQTFLRHKAPLTVNELSESQSYSLTFPPLNVIGQLAEKHTSVKALNDSLKDIYSKKLLPEKPDLTQFTISKIKVSQLAEPYKNESDKPLTDEQNDYNDWYDKIIASEVTEIQGIITPVYHSLGVVFSSDLYVGAEVSLIQVKLKQDSSGEVEKVLATSFVTKEAPKKTQTQEEQEDLKKILPSAVFNFDPKLIDDGYFLLRTRFWVEEYLQKQQEFLGEEVKAKFPDSVKQGQLKFETHIEHEESRTVQDVYTYELHEKVTFKPVSGFGKLSMVCGDLISLEECLIYQYPTALPSYSDFMIQQGNPVA…
1	1478	GC_00000035	other	emors_1_1_cat	81376	37	38.2															MFFHQPTLTSLSLPPLQHKKTITLVILTIISVRLKITNRIESAHNKFYKNSMAIQFTSIVESGRFKDRKFARLVLNTIILIIVLMVMTLEILDDYDILDIFNDIQDNIIAFTTLCYMSALYSYGYQLPLFKHQWQVFLILYLTLAQAVYVLGYLTYTQYDQHSIIYLLSYGLFWSLFYGYLIYTINNLKNDIK
1	1508	GC_00000036	other	emors_1_1_cat	81376	37	38.2															MNNEYHILSKSVFSQFLFQQTPKPIVPVEPDLLLEMTFSPKLFIINDIAEKVENLVQHGVEWLDARVDCSPSQPTDEQIKVFENFRMPYIHQTYRLTNEEKQYGKLNWLDLNSVNLDFSRLNNIPLEERLIFKLEEDFGYVFLHESVIELLKKHVKDVWVRDV
1	1531	GC_00000037	other	emors_1_1_cat	81376	37	38.2															MCKQTNYSKYQKRVIKFLNDLLGADTPFTYERANNNHLKVLIDGVTKPLFTGSTPSDCKSINNFMAEVKRELKASKKEESKLSQPEKTGVVSAVTLSNDKLIQNCVKSLRTRITVLKEQEKESVLNNKCINGLNLKRIEIVKHSVSLALQARKQGTYLKPKELRTIEGMVHNHLNFMLPSMAYYAELLNSTSKDKLAKVQPNKQQASVHNESNKNNVISLEDKTQHAPTKEAKKLAKKPKQPVSNKNMNTKNSNSATELMAMSANNRVSLLRNLTKAQALMLIDDINQAMAANREEDIEAVIALIRDKDLPLDAIISRMEAA
1	1557	GC_00000038	other	emors_1_1_cat	81376	37	38.2	K19135	CRISPRassociated protein Csx14									30.363	4.06e-21	WP_116935424	CRISPR-associated ring nuclease Csm6 [Verrucomicrobia bacterium]	MKNILIAVTGASPQVLTETIYALHTQGKPIPEAVYVITTENSKQTLKEGLFIQGYWDKLMTDYQLPPIAFNSDHIWVITDDNGNALVDAKGVDDQSIMADFITRKVALLTQDNEVAIHASIAGGRKTMAFYMGYAMSLYGREQDVLSHVFVDDEFEFVSDFYYPTPVDCFIQGKQGEAINAKEATVTLAEIPFVRMRRQVDECIINQMETHSFSKTVSALNSANNTQVRVSISTKEKTVEVAGVKIPLTSKHLAIYLFFLSKDNRKATLDRYFEDDKTQTTDYLCVLDKMKADVRLYKTMGLEDEGQWRQKDHAELATLTKDFVRQSLNGLHKSLKDKLVPDLFEKIKVHSDGVKSGATYLISPEVLFICDGIEL
1	1586	GC_00000039	other	emors_1_1_cat	81376	37	38.2							EFF01536	48.338	1.79e-107	Toxin PAAR-like domain	45.361	1.19e-18	WP_119719572	hypothetical protein [Klebsiella pneumoniae]	MGVTVAANGLSVVHQGSGGEANATLPDVCLTKVGKPIVPIPYGNNAKSADLAKGTTTITMDGGNPVAIKGSTFSKSTGDAGGDKKGVASGTIEAEAEFISASPTVKFEGKGVCRLSDQMTMNKANTMCLGGAQNPSVSLTLEEEGTYTVDLFLSYSDGDPVQGATYKLVDQTGTIFEGNLDTKGKASISGIAPGEFDIEYGEDSREFTPNIPTKENPNYNPNASAQMLIDETKRGEIGFWESSWRKTAGAASWIWGVILGDFNDDATVEQIIANTAITMLPVVDQAADVRDMVANTMTLLNEEERDKPENWLALSLTLIGCIPVFGSAVKGTCKVALKSGKATSKDDLLAIMRAMGKGDPEKFLRTLDWADYAKQTSQIISDVLQPCIEVATELASYAN…
1	1612	GC_00000040	other	emors_1_1_cat	81376	37	38.2															MNYSVITENYFSAKTSFSCIDSREMLYSKNNYEPTSSINPIIWEDSNGLIKDITHIIDNGDLCVSEEFAQLIMSFDPYGIETYPAKLILSDGTIQKRYILALNNIIDVMDREKSITEISPKRNKILVQALYLSEEKLLTYPLEKRILFRVKGAEIATFYSEDIYDLINNNERFNELRKIILNTSQEAPTF
1	1679	GC_00000044	other	emors_1_1_cat	81376	37	38.2															MSIQKRKGKWERSSLGHIDSKRKAHPLNFKAKSIAAHHLISCEVASKLSSIRKKQIKYKGYDINHPYNLVFLPMIDQISCQYNVPLHKSGHTDSKLEAYYAEQSGSNINDEVSNLISERDKETNENKLSLLQGDIDMLNNLKGYHRIVGSMLAKTLKSLDCDDNSDDFVDSLDELSFDIATKLGRFQLHLISRGRHMQSGQDGCHYCRQDGNRNKHYHVTDNIPTQDYVKEYCYKGLRLYTVQEKA
1	1733	GC_00000048	other	emors_1_1_cat	81376	37	38.2															MKMTDTKKHAIKRLILNNHWEFETRTISKNGKQEIGAYSGNRTRIISLEG
1	1813	GC_00000056	other	emors_1_1_cat	81376	37	38.2	K01154	type I restriction enzyme, S subunit [EC:3.1.21.3]									31.407	6.25e-44	WP_000014001	restriction endonuclease subunit S [Salmonella]	MSSLPKGWANSELCNITEVVSGNAFKSKDFVENGIPVVKISNVQSGKYIEKNQEYLPDSFVNESNARFIVNHNDLLIALTRPIVSNKLKVCTYPNKKQVGLLNQRVARLDVYEGSSECFLHYYLSSKGFKESVQASMSETLQPNLSPKSLSKIRIDYPPLAEQKRIVEKLDEVLAQVDTIKARLDCIPSLLKRFRQSVLASAVSGKLTEEFRTEWLEEKIQLILSLQPTAKTRRGVPDNVPIDEDLLKQEIPKQWVVESVARLLKLAVITDVKDGNHGANHPKSSEFVDDGIPFITAAQMNDKGHIDFEGAPKLKGEPLSKLKVGFAESQDVIYSHKGTVGRVSVSDRDCILSPQTTYYRLNQTFIIPRYLAVYLQSQQYKNQVNKVKTQTTRDFVSIS…
1	1822	GC_00000057	other	emors_1_1_cat	81376	37	38.2	K06940	uncharacterized protein									46.25	3.26e-21	WP_117611299	YkgJ family cysteine cluster protein [Bacteroides ovatus]	MPFPCTGCGLCCQQIHNIVELQEYHSGDGVCIFYQKQQCSIYQNRPIVCRIDDAYDQIFKTRFTIDEYYKENAKICNQLQMNAAMDAIYKVRL
1	1830	GC_00000058	other	emors_1_1_cat	81376	37	38.2															MAIPWLIGAAVVGLVGSAIKSSIEEDEAKERQERWEREERSRLRQEEQERIDNARKDEALRVQRQIEKEKKALIHQESMRLMEKYEISDLSSTEFKSYISNIIVNGVSDSTSEIEKILSSSKKMIEVKEEESQLEKQLKELKEIQRYLESI
1	1838	GC_00000059	other	emors_1_1_cat	81376	37	38.2											28.804	6.91e-07	WP_117586042	50S ribosome-binding GTPase [Prevotella copri]	MKLDISIMSEKFQHSLSRLDKIIYSDQKPRIAVFGKYNHGKSTLLNAIFGYEAFKSADKRETVENLSIEHDDVMWIDTPGLDADVHGKDDAAALTGAFEMADYLFLVHQVTAGELDKYELDIFNRLAVNTTDYSQKMCLVLTQIDQKTGDELNTIIDKVQQQVSLESQFKEVKIIPISATRYLRGLEENKPIFCEKSGISTLFDEIEKIKNNVIKTREKEKFELINKIAHSLNEMELAINQEMNINKNKQVSLKSDITCELNKLITKVA
1	1846	GC_00000060	other	emors_1_1_cat	81376	37	38.2											31.967	1.06e-06	WP_117586042	50S ribosome-binding GTPase [Prevotella copri]	MLTAFAQIKENIITSAPLINKYRDINEVKKELFDIIDNDTLQIMLYGAYNAGKSTLINVLLGEELAVVNDIPTTDKVDEFNWCGYKLLDTPGVNAPIEHEKTTNEQIKRSSVMLFVIREGDQDSKDLYIRLFEMLALGKKVFIVLNHQLTNDDDKAMAYKKIHSIVMSQAPKYGIEDKQIRELVVCPINLKTALNGRLNQHDKLLDHSGYTNFISLFEQWVKMNDAEQERLEHAISAVNTLWYMPTITELKQDGTDESNDALLNFRQDLAHLQARKKGLILESREMISHNVRLMKAQISQTLTQSTNQIELDTELEALISPLYKKVELWLEESLSHHYSTLSCDVQHTLKQASEDKNNPFFDSMLNQAKTFFSDEKTIKQGLLYGRKFKIPGLKGRWEK…
1	1862	GC_00000062	other	emors_1_1_cat	81376	37	38.2											40.996	8.03e-51	AAC46428	unknown [Acinetobacter baylyi ADP1]	MVKNENVFVTSLRDFTGDFVLVNNREDELTKMQFEFESKIKKTLENSNGKLKKESLLFSLTDALKVSVLNGIKEWNEKLIDSLPMKKLSEEYSDRIILLVFGKVNAGKSSFCNFITEQFPNEEIKRFCFVDNRIEYFEQSFAEGVVETTATIQGVEIGRNFVLLDSPGLHSIVDENGDLTRRFTDSADAVLWLTPSSSPGQVQELTDLKLELEKKKPLLPIITRSDQLIEDWSDELNDLVHTIVNKSESIRQLQEVDVIERVKALGNVDDLKSAISISIHAYREHQEKENAQSQAGLNRLFSSLSDIIHEAKEYKVEKANQQLINFINDNVLSTLEKDISPQLLKLKDQTQKTLDDLKKKESLIISELLTTVKSQVRGVVEQHSASQDKVAISSGLNQL…
1	1916	GC_00000069	other	emors_1_1_cat	81376	37	38.2	K01153	type I restriction enzyme, R subunit [EC:3.1.21.3]									70.289	0	AAA97247	CG Site No. 620; alternate gene names hs, hsp, hsr, rm; apparent frameshift in GenBank Accession Number X06545 [Escherichia coli str. K-12 substr. MG1655]	MQKSNFEFLKGVNDFLYAIARAAENNFPDDPNTTLVKVRIFGEATAKHLAKLLDIEAPDNQHELLRELGKIPFVDDSILTVFHKLRKIGNKAVHEYHNDLQDAEMCLRLAFRLAIWYYRLVTKQFDFAVPVFILPSSENKAQFEQEMHSLKQELVLVRQGEAQTKAEVAAQNAKLTALTGYISVLESKQEETQGQTQERIAALEAQLQRKDEEIAKKTEAERKAYKKQITDQAASRSLDLSESESRYLIDNQLRKAGWDADSKLLSFANGTRPQIGRNIAIAEWPTGKDETGKTGFADYVLFIGLKAIGVIEAKKANKDVVAKLSEAYRYSKYFDNDFLRNELQHAANDQTALDQIAELLPTYLPTWSDSSNSEPYKIPFCFSANGRAYRSAIKTKSGI…
1	1923	GC_00000070	other	emors_1_1_cat	81376	37	38.2	K03427	type I restriction enzyme M protein [EC:2.1.1.72]									49.706	2.68e-162	WP_117017508	type I restriction-modification system subunit M [Aeribacillus pallidus]	MNNNDLVAKLWKLCDNLRDGGVSYQNYVNELASLLFLKMCEETGQEDDLLPEGFRWTDLKAKIGQEQHQFYRNMLVQLGADDHAIVRAIFQNVNTTITQPAQLTELVSNMDSLDWYSDEDGDKGKSRDDFGDMYEGLLQKNANETKSGAGQYFTPRSLISTIIEVMQPQPREIIQDPAAGTAGFLIEADKYIKSNTDNLFALPGEDQEFQMKKAFVGLELVPETRRLALMNCLLHDIEGDENEGAIRLGNTLGSAGENLPKADVILTNPPFGSASSTNITRTFVHPTGNKQLCFMQHIYDALEPGGRAAVVIPDNVLFEGGKGTEIRRDLMDKCNLHTILRLPTGIFYAAGVKTNVLFFQKGTPENPNQDKGCTKETWVFDMRTNMNTFGKRRPLTEKH…
1	1938	GC_00000072	other	emors_1_1_cat	81376	37	38.2															MKPINYVIAFLFLFVQPSYAFEHSNANPGSAEFLIAACQEYTELYNKKDEQGFGTFFTTSKEESFRAGYCLGAVMHTNSKCSYPYTYTPSVYQAAKVIASVNVKQRYSETKLLEDAVCR
1	1944	GC_00000073	other	emors_1_1_cat	81376	37	38.2															MIRSGNQYGCHFRFNNIKNKIRTLARVMQKNISTASKIWHGTKLFIKWFWLMTMFLLGVSLLLVMPLIMFEYSFSLSELDLIETLFIVFLVVFIYQYGKRCRQIDAPLVRKIITPWVHQAHIFLVFYSLTLISAPLLELNLRELERMPLLDLFGYILMAGTFGYSYYRIGLFAKKTVETVEVITTEGAVE
1	1950	GC_00000074	other	emors_1_1_cat	81376	37	38.2	K15045	radical Sadenosyl methionine domaincontaining protein 2									40.418	3.06e-71	RGE41128	radical SAM protein [Comamonas testosteroni]	MNQANQLVINYHITEKCNYDCHYCYAKWAKPNELHRNVDDMKKVLSNLAEYFLSPNPIQKQLQYQSVRLNFAGGEPLLLKQRFIDALDYAIELGFEASIITNGHLITDQFIIEHSHKLQLLGISYDSYYAERQQQIGRVAPAGKVLSPERLQSIFKQIKRQSPTTELKINTVVNQYNTEEDFTDLITKIQPNKWKVLRVLPVFDSIEPIKDQQFDAFVERHESVAHFMSAENNDSMTNSYLMLSPDGAFFQNGNDELGYFKSRSLLTTPIDIALAETGFDAAKFAQRYQ
1	1956	GC_00000075	other	emors_1_1_cat	81376	37	38.2															MSLVTTNQAVKDLFGIEGSEPLRSKANSYLRNGVIPSSLVIDDGFSDESMGKRGKKLLKSQAVHCLFNALVLDAFFNDTKFVKAIFEQSRTRVASVALCEEVLLKAQAVATVSHLSNLAQQFLSQLKDESFNLREYRLTCPFDDQRLPQMDMALQNTGLLYQLLRAQRLSLSHKEQIWLCWLEQDLAAASQLADQVDSALLETDMALKEMVKRAHKEYQEAQSFNALLSSLPD
1	1962	GC_00000076	other	emors_1_1_cat	81376	37	38.2															MNQQQITVESGVKIKIITPKAPPLIINRAKKLISKIFVQDILRGMRPKVIQRNKKWLSYRVNRKYRLLVLRTRCNTGPYYCLSHTEFDHWVNNH
1	71	GC_00000001	flanking	emors_10_3	81241	37.1	38.2											47.917	1.71e-27	RGC81918	PTS fructose-like transporter subunit IIB [Hungatella hathewayi]	MKIVAVTACPTGIAHTYMAADVLKKAAAKLGVSIKVETQGAMGVENVLTPVDIVSADLVIIASDIEIEDKNRFLGINSKQFPIETILTDVEGILKKHLF
1	72	GC_00000001	flanking	emors_10_3	81241	37.1	38.2	K11203	fructoselike PTS system EIIC or EIIBC or EIIABC component									61.429	0	WP_117709256	PTS fructose transporter subunit EIIC [Fusobacterium mortiferum]	MDITSLINANVICLDLKSTSKEDILQEMVQILDDAGKLSNKTQFLADVWAREEIGNTGFEDGIAIPHAKSSAVLTPSVAIGISRTGIDYGAEDGEPSDIFFMLASTDGDDNQHIEALAQISSRLIEDGFTNKLKKANSKEEILDLFTDIIQPSAESADIENAPSQTEKSELTRKLGRTKEHLLFGTSHMIPFIVAGGVLLSLSVMISGQGAVPTEGILADIAQMGIAGLTLFTAVLGGYIAYSIADKPGLAPGMIGSWIAVQQYNTGFLGAIIIGFFAGFVVRSLKKIKLPESMASLGSIFIYPLVGTFLTCAAVMWVIGAPISNAMAALNEWLASIAGSGKIALGAILGAMAAFDMGGPINKVATLFAQTQVNTQPWLMGGVGIAICTPPLGMALATF…
1	173	GC_00000002	flanking	emors_10_3	81241	37.1	38.2	K07001	NTE family protein									30.518	3.63e-99	WP_119143698	patatin-like phospholipase family protein [Pseudomonas reidholzensis]	MLHVFRLNLWFVFLATFLFTPYLYAEPIKEPSRPKIALVLAGGGAKGAAHIGVLKALEELNIPIDIITGTSMGAYVGGLYATGKSASEIEAYLHTVDWYSGYQDEVGREEKNIRDKKYEDRFAINPSLGIRKEGVKSPKSAIQGQNMLKILRETSGNPVSVASFDDFPIRYRSVATDIVSMEEVVIGHGLLVDAMMASMSVPGALPPYEFEDKLLIDGGVTNNMPVELAKEMGADIVIAVDISSNYMTKEQIGSLFDVASQLTNFMVKRSTQEQAEFLTDKDILLQPRVGDIETTDFSSMPRAYQEGYDTVMMLKSRLQSLAVTPNEYAQYSNKIKQQSSNVRLAQGAIIDKVEVENRSHYESDKLERFIQFEQGTLLNSDYIEDKIHALYATNRFETI…
1	242	GC_00000003	flanking	emors_10_3	81241	37.1	38.2											30.097	1.17e-08	WP_116986099	phosphoenolpyruvate--protein phosphotransferase, partial [Escherichia coli]	MELNTIDYRITFFVKDQGLPPQVASQLTRLAKKFKSLVYIDNITQNRSTNAESSLGLLQVGLCPGDFCQLITVGMDAEWANFVLTDLLSSTFDFVASDKLCDFSETITNTYPQLTPQCEVDFHYVKAQAVLSKFEILKGLSQLIYPKESDELLLALIKREERSSTAMAKQIALPHVISPYVEKPTIAIIRSDYPVDWASKMGDVNVIIALVLPEKPTKEMIMAATYLTRSLLSEDFSQRLVHTRQPKGLQALILYAMCQLL
1	310	GC_00000004	flanking	emors_10_3	81241	37.1	38.2	K01809	mannose6phosphate isomerase [EC:5.3.1.8]	M00114	Pathway modules; Carbohydrate metabolism; Other carbohydrate metabolism	M00114	Ascorbate biosynthesis, plants, fructose6P > ascorbate					61.637	4.96e-172	WP_005478337	mannose-6-phosphate isomerase, class I [Vibrio parahaemolyticus]	MNALKPQTFYPMTNVIQDYAWGSHTSIEALFDIKNNTGKPQAELWMGAHPNGCSAVTVNGDSVLLSDLINQDKEAFLSKTTADAFGELPYLFKVLAAEKALSIQVHPNKQQAVDGFEKEEKTGIALTAFNRNYKDNNHKPELVYALTDYKAMNGFRDYQKIVSLFSAMQLSTIASYVDDFAQEPNSNGLQRFFKAILSLENETKECAVAELLDYASNSTDELFVLLQDLAIQYPNDVGLFAPLMLNVITLKPGEAMFLSACTPHAYIHGTGLEIMANSDNVLRAGLTPKYMDIDELMSCTEFVSQPLSSLLTQPNTVDGGMSYPIPVNDFKFSVFTATDALTLETNSAEILFAIDSDLTLTHENGESVTVAKGHSVFVPAYAKRYSLTSSGNVARAYN
1	376	GC_00000005	conserved_T6SS	emors_10_3	81241	37.1	38.2											50	4.79e-11	P96156	Chitodextrinase; AltName: Full=Endo-chitodextinase; Flags: Precursor	MIKLNKITAAITSVMFSGYLYAADASATSNVVTFVPGETKVQNGDMVSFNGDCFVAKNNPGVWESPTADSWFWDVAECSGEPNPGPGPNPGPNPTPDPDLGDIIPFIPGKTQVENGDVVSYENQCFIAQNNPGVWETPSASSWFWTLTECSDEPVNPEPEVTELSILAPTAGQVLTANEAISINAHVDGNLAAKVEFWANNTKLAGKTVNQNNTQYSQTWTPSEEGNATINVFIFDKNNQKIEQKSVSVTVKAEVTEDFVAPVVKFVTPANGSTMNVAESLSISVNATDADNDLATLVVKANNKEICSFDAANTDTFACDWQPTQAGNVTLNAIATDVQDLSSTATVKITVEEDVVEPPVEPPVTPGDLCKDFNVYPDWTRGDHATGGDIMVHDNIAYS…
1	430	GC_00000006	conserved_T6SS	emors_10_3	81241	37.1	38.2	K11892	type VI secretion system protein ImpK									24.8	1.8e-08	WP_010910863	type VI secretion system protein TssL, long form [Mesorhizobium japonicum]	MSYVEDDVTVVLFQPEPGKPMEVMPAPDLSRNISVSELDISSMGINPLVDQFSWLIASLSCMSSIPWLDDPMPFREQVAREIRKGERMLNEMEVDRASILVIRYCLCAAMDESVCRQEWGANSNWSQNSLLSEFHNETSGGDKFFVILDRLKADPRKYRHVIEFLYLLLQLGFKGKYGRAERGAESLTEIGNTIYRLVRDERLAEQEKVALVDVKSKYLKKPLKRVLPPKLILGVSALLFAAMYAATYLVIDVRFQKLLSLYQ
1	469	GC_00000007	conserved_T6SS	emors_10_3	81241	37.1	38.2											41.849	3.09e-99	WP_011105819	hypothetical protein [Vibrio parahaemolyticus]	MTIFIVIFTIYMVYVSRCHLFTNKYNACSLITTTRFYIFMRIFSFLKLFAGLGLILLISSCGGESKDTSPPKRETTSVSGILFDAPIAGARVVLWEYANGAIGKKLGETRTSSKGDYSMEVNSGSMPVLLQAFGGAYTDPATGEVVYEGDGKTLKFESTAYFYENKANRIMLTPLSLISKGLADYKIHKLGMDAKGAIDSANSTISNMYGFDVITVEPIDIVKGGQSAYVTAGHQYGAYLTAYSVFSSDLIKKYPASDSSSIYTSFTLSDIMYRDISADGQLDGYETDNISGLDKKISFGKESVSVETYTNILSQYILITVNNNRLNVSGTNPNDYKPFASKVNKLGTTPETMTVFPPRTEVPIDDTEPTVERSDKDVLVRLDSLDLLVKDNVGTKSLR…
1	508	GC_00000008	conserved_T6SS	emors_10_3	81241	37.1	38.2	K11906	type VI secretion system protein VasD									26.984	5.13e-15	WP_010910850	type VI secretion system lipoprotein TssJ [Mesorhizobium]	MQKLLTFSLIFLLSGCTMWDQFKESTGITPETSSIELIITADKVLNVREGGQSSPVILRIHELNSPVLFRNLDFFALFENDKDALGDEYIKRYEYQIQPGDVVHETLVLDPATRAIGFSVAFRDINGSSWRKVELIEEKSEYFLKLNLKESELSSNNTRGIEQIYF
1	546	GC_00000009	conserved_T6SS	emors_10_3	81241	37.1	38.2	K11893	type VI secretion system protein ImpJ									33.107	1.16e-83	WP_005463797	type VI secretion system baseplate subunit TssK [Vibrio parahaemolyticus]	MSLYNPVVWQDGMFMKPQHFQQLDRFQGKQSGMLSGFESPLHWGIKRIEINTELLALGKIGITHAEGILQDRTPFDLPLHASLPEVKDVDASVANKVLYLCCPLPSERSELFGTSKDGARYSIHTQDAVDACYDSEEIANITIGKLNFCLMYEDEDKSAYTSIPILKISEVKPDGSIILDNAYIPTCIDINASTVLKKFTTEFASMLRHRAESIVQRLGVVDQQGVSSVSDFMLLQALNRYEPLFWHFANIEGVHPEAFYRVLLQAEGELATLCSSSRRPQEFVPYNHGNLTSCLSTILHNSKVTLSVMSEQRAIPLPLKEQGYGIRIAPISDRSIVESTTFILAVKADVTLDILHTQFVSQTKIGSIDNIRELINLQLPGINIKPMPVVPRALPYHAG…
1	584	GC_00000010	conserved_T6SS	emors_10_3	81241	37.1	38.2											66	6.29e-97	WP_011105828	hypothetical protein [Vibrio parahaemolyticus]	MAKPIQLGFMALIMACSLPAFAKGERYGIAANFKTIESTEYEQGMSGELSIISYGLVHTRPIDENNNRWRWLFGFNYLSDYIEAPANGVYQEVTNYEFRIVPQYALGNWWAFTPYVGAGLSLGYSQYGNRWKVDDEGYKYGNQLDDIDQFEVGAVLSFGTVIKLGSNPDAHLQIIPQASYIQPIYNDGLGGLELSVSLLF
1	622	GC_00000011	conserved_T6SS	emors_10_3	81241	37.1	38.2											39.13	0.000438	WP_117539334	FHA domain-containing protein [Coprococcus catus]	MHLNQLTLFITKSPEEYTGSKHIEMPESGGSLGRNPSNTVSLVDHNRFISGSHCLISIYGDTYYLSDVSTNGTLVNGNKLLKNQPISLYDGDTIVLGRYEISVGLEKLSNSVNIAADISEETDSTDPLVNLAEYTPDEEKDKGNIADLFKETRIDKVDSSDPVAHLNFITQTNNDDHLLHGNEKKQEQKIKEPIHTRQLLDDSDSVHSEFDVPNLIPEDWFSNDFTDTSIPPVQVNEPIATHSEPESMMHSFTDSTPETIISSASEISSVTEQLAWEDVTQTIQPSVSTTEPKSDEFFIAPSTSMDVYPSQSIETSFNSKMSDDAASAFYKGLGMSASQIEQTDEQFFQQMGNCLRLCINNLQKELSELKAIKNNEQDDSMTNIVELMLSLNHQQLLSP…
1	659	GC_00000012	conserved_T6SS	emors_10_3	81241	37.1	38.2											30.882	1.68e-20	WP_116949140	Lrp/AsnC family transcriptional regulator [Jiangella endophytica]	MSNMNLQGLDKLDRRIISNLLSNGRESIANLSRNVGLSRTAVAERINRLEKTGIIKGYTAQIRMGNKDENASSYLLISCNKGQKDSVSDGLKEIPEVKMTSIVGGTYDIICLIEAPDLHRIHYLCSEIESLSGIKEVKNTIVLHQPVCR
1	695	GC_00000013	conserved_T6SS	emors_10_3	81241	37.1	38.2	K11901	type VI secretion system protein ImpB									40	1.77e-32	WP_117580760	type VI secretion system contractile sheath small subunit [Enterobacter]	MSRDGSVAPKERINIRYVPATGDVQEDVELPLSMMVVGDFTARTDESPIEDRTPINIDKDNFNDVMEGYSPNVKVNVDNKLSDEEGAQLGVDLTFNSMKDFSPEAIAKSVPELNGLLELREALVALKGPLGNVPAFRKKIAAVLQDEEARQKLLEELNIGSAKEEAKAE
1	731	GC_00000014	conserved_T6SS	emors_10_3	81241	37.1	38.2	K11905	type VI secretion system protein													MEKGYRLLERIELGEPKNCYEKVVSHKHLIESIHLHLADLLNTHAGNAMIDNDYGLPDFNDVLSNNTNLVRNIQQNIKASIEKFEPRMRNVEVHYRHDNNNPLQLGFGIGGEVIHNGGKVPMAINIFMGVDGQFNV
1	767	GC_00000015	conserved_T6SS	emors_10_3	81241	37.1	38.2	K11900	type VI secretion system protein ImpC									60.288	0	WP_117611541	type VI secretion system contractile sheath large subunit [Escherichia coli]	MTAEAQAPEQEAALVESGSLLDSILNETRLKPSDEGFDVAKRGVEAFIGELLSTNTSDKVDQSLVDLMISEIDQKLSKQVDAILHNKEVQAIESTWRGLKYLVDHTDFRENIQIELISAKKDEVLDDFEDAPEVVKSGLYKQIYTREYGQFGGKPVGAVICDFQMSASSPDIKLMEYMANVGAMSHAPFITSASAKFFGLDSYEELPNLKDLKSVFEGPQYTKWRGFREHEDARYVGLCTSRMMLRTPYSVEDNPIKAFDYNEHVKDGHDNYLWGNSAYAMASKISESFAKYRWCPNIIGPQSGGTVSDLPVYNYESMGQIETKIPTEILISDRREYELAEEGFIALTMRKGSDNAAFFSANSVQKAKVFPNTPEGQQAEMNYKLGIQLPYMFIINRLA…
1	803	GC_00000016	conserved_T6SS	emors_10_3	81241	37.1	38.2	K11903	type VI secretion system secreted protein Hcp									52.326	6.63e-65	WP_137712216	Hcp family type VI secretion system effector [Brenneria rubrifaciens]	MPTPAYMSIKGETQGDITKDAYSADSVGNVWQEAHVDEFLVQELDHVLTVPRDPQSGQPTGQRVHRPVVVTKQQDRCSPLLFNSLVSGEKLPECNIKFYRTSTSGKQEHYYTIKLIDALLVDMQTRMAHCQDAAMSDRVTEEVLKFTYRAIEVTHETCGTAGNDDWRTPREA
1	839	GC_00000017	conserved_T6SS	emors_10_3	81241	37.1	38.2											45.455	1.23e-07	WP_117031792	DUF2169 domain-containing protein, partial [Klebsiella pneumoniae]	MQLWDIDSESPFTLKGRFQRDSDGHEVWVLSMKRAWTFLDGSWSEEVDNLELNDDPIYLGEPGFSAMVADHDFPIYKKNTDVLIYGKARSYAKKPVHSQLCRVLIDEHIDKTLKVVGERHWVDHSGSITVSTTQSFIERDIDYSNAIGGDERNRIGGGVAETNTELLKAKVPSIFYPDQNWQASSKKVKVAGFGPMPPFFHDRAKWAGTFDEKWFEERRPVWPIDFDARFYQSAPQDQQCNGYLQGGERLMVSGFCHNDALSFRIPSEKFQAVAVFNGKEEKINMPMYTLWIDTENKRIEATYTAAFPCQNREHLLTSSYLVELS
1	875	GC_00000018	conserved_T6SS	emors_10_3	81241	37.1	38.2	K11895	type VI secretion system protein ImpH									32.344	1.8e-54	WP_000348794	type VI secretion system baseplate subunit TssG [Escherichia coli]	MIQYIVNKPCDYSFFQAVSLLEKHYQNLSGIEYKAIGENQYVKNEYIQFSVSPKLSFPKSDIEFITEFERNDASYTQIEVNFMGLHGVSSPLPASYTEKLAGRDPDDNPVKEFFDFFHHRYISMLYRVWKKYRYHIQYKSDAKDPFSGRLLHLVGLSSVIQESSEVDLDRAKLLSYVNQLSTRTRSPKLVSGIVSHYFTLSNVYIEEWVYRRITIAASQRNCLNRKNCQLGGDFHLGQSMADLTGKFNLCIDDIDFDTYVKFLPGGALHETLIGLMKFILCDPMAWDLKLTVRNKSLPINQLGDGLGNELGQTFWLGAAKGEETKIKIVGSN
1	911	GC_00000019	conserved_T6SS	emors_10_3	81241	37.1	38.2	K11914	sigma54 dependent transcriptional regulator									41.463	2.44e-77	WP_126397535	sigma 54-interacting transcriptional regulator [Blastochloris tepida]	MSLAKSDNLNNALLAISQSLADRSQLALTLDAILAAARQLTFADHGIIYVLDQTGQALLPSVVHHNEHILAEHPWQPLTLESIDETDPFSFAIQNGEVVLINDLYQYNGYQCDEIYQNESILNRKSKNLLAWPLIDNEKNTVGLLVLFDLNVINDEASLTCFCQMAATNIRQAVWLEKYGYMIKELSEDNASLTRENNQLKQRKQSQYSGPIAESEVMLNALARLDKVLSLPVDVLIRGETGVGKEVIAKYIHENSNRSKQALIVQNCAAIPEQLLESELFGHKKGAFTGADKDKIGLFEAADGGTLFLDEIGDMPLLLQAKLLRVLQERKFRPIGGNKEISVDVRVLAATHANLMEKIKKNEFRADLFYRLNVFPITIPPLRERTEDIIPLSEHFIKL…
1	947	GC_00000020	conserved_T6SS	emors_10_3	81241	37.1	38.2															MKPYLLLLPAALVVAGCSNQTSVPDPLAPYKNVHIIGNKKQSIGSFNYLSKDVDGYTDKQVIVYFNEIPFTSTFNLCADKGVYIANCKSTVSIFPSKNKGVIFNYDLNFYNGSYPARVGSMNILLPSTTTRKMDNLTQYTSAKFSEEQFLESEKLKEATFILMKSS
1	983	GC_00000021	conserved_T6SS	emors_10_3	81241	37.1	38.2	K11891	type VI secretion system protein ImpL									22.962	3.98e-68	AFJ27267	IcmF-like protein [Escherichia coli Xuzhou21]	MIKNTLARTPFILSTVISAFFALLLVGVYYLWFNQADLRLLWGMLGIIFSIFTIFNLTLYIKKRKNKSHQNIETEEDTLSMVLKPLLHKAGKKPVYLVLGNKGSGKNQFLNVSNAIKPMDKVKNVKNDFFEWSESDSAVYIKPNHRLTFQEISSNDSLLWDALINEVIKHKPRKPFAGCMLLIDFEFLIVHDDEQTDYTLNALLQRLESIKETTGATLPLYLIMTKLDKLEGFKEYIHFSPLKSSVEFLAIPLKDAKGAILDYFRDSYKNIVKVMESNALDSSSYTNNPDEKQTILAFPKQFELCEKEISRIIERLNELNQGTYSIDIREVFFSSSLQGGRKYNLLAKSCSNYFNLPIIASEHSQLTETPYFTRFLVDAKVLPESDYSAENQHYLKRIQ…
1	1019	GC_00000022	conserved_T6SS	emors_10_3	81241	37.1	38.2	K11896	type VI secretion system protein ImpG									32.241	1.58e-89	WP_117681754	type VI secretion system baseplate subunit TssF [Klebsiella pneumoniae]	MSNSKYFQDELTYLKEAGSEFAKYHPKLTHFLSEGTFDPDVERLLEGFAFLTGRVREKIDDELPELTQSLISLLWPHYMRSVPSMCISELVPHSGSVTEKIIVERGAEMASEQVEGTQCQFRTCYDVALYPLSIQQIEQNNSRTNSSLHLTIAANNGLELSRIKLDILRFHLHGEQHITRSLYLWLFRYLEYVELDVGGGYKHRLRADQVVPVGFGDGEGILPYSKNSFSGYRLLQEYFSLPDKFMFFDLKGLEWLGGIPQRSTVKISFAFSRALPSEVIVKNKHFKLHCTPSVNLFEKDGDPIRLDHQLNEYKVRPQSSNQEHYEVYSVESVESWSKAERCRKKLIEFESFEHQINQRDKRDFYKTKVSERINGRGLERYISFHSHNNQVSELGSETV…
1	1055	GC_00000023	conserved_T6SS	emors_10_3	81241	37.1	38.2	K11910	type VI secretion system protein VasJ									24.554	3.18e-25	WP_119144555	type VI secretion system protein TssA [Pseudomonas reidholzensis]	MTSLNFESLLKPISGASPTGEESKYEFCYELMELEIKKFGSLFGETVDWKVVETNAIEVLTTYSKDLKAICYLIRALIERNGFEGLEEGLNLLKQNLVLFGTDLYPQRKRARDGAMEWFVAQLETVLPKLDSSTTNWESVTSYLQKINEISDQYYEVFPDSEVEFYLITSVLNGISQRVVGAGETNTDTSRNTVCEPEPLVEETTSTVTEVKTPVQVVTQAPRTVNTVKQEVDIDTDFTSPSASKRTLKKVAEFMLHSDISTPLAYRLHRNCTWCEVDELPPHDNDKKTPLSLAVSQDQLSEYRDKAKQETEAEVIKRLERTLTDAPFWLTGHYLMFQMLTNLDHHEAAEAVKQETQHFISQLEGIELLTFANSIPFADEETLKWLSSNTASVPVSVAS…
1	1091	GC_00000024	conserved_T6SS	emors_10_3	81241	37.1	38.2	K11907	type VI secretion system protein VasG									45.504	0	WP_117580830	type VI secretion system ATPase TssH [Enterobacter]	MININLSSLIQRLHPITKVALEDAAALAVSERASEVQIEHFLLSLLERPNSDFDQLLAHFECSENLLRQAIKSTLENSHKSNGGKPVFSAMLIEWLQEAWLVSSLDLSETQIRSGALLLTLISNPLRYGQHGYSSLLENINPETLKRNFAELTSRSIESQVATSEQTHAREDGSALSKFTTDFTGKARKGEIDPVFCRDQEIRQIIDILARRRKNNPIAVGEPGVGKTAVVEGLALKIVQGEVPDCLKGVELYGLDMGLLQAGASVKGEFEKRLNAVLDEVKNSPTPIILFIDEAHTLVGGGNQAGGSDAANLLKPALARGEVKTIAATTWSEYKKYFEKDPALARRFQLVKLDEPSTEQAALIIRGLRAVYEKSHNVYVRDDAITAAATLSDRYISGR…
1	1127	GC_00000025	conserved_T6SS	emors_10_3	81241	37.1	38.2	K11904	type VI secretion system secreted protein VgrG									37.455	1.19e-117	WP_002213876	type VI secretion system tip protein VgrG [Yersinia pestis]	MVSDIEFKFEVLGTEHEFRVESFNVVEELSKPFHVSLSLLSLDADITFDELIRKPALLSIFGQGVGTARQFHGVVNEVRYLGEGRRFSRYQITLVPQLWFLTQRQDCRIFQEKSVVDIVTEVLDGAAVTDYRFDISDLYPTKEYVLQYRESDSHFVQRLLAEHGLWYYFEHTTANHTMVIVDKNDAIAELENTPLNSSYVGPVIYQADGGGNADREHIFDLESINRVRTGHVTHTDYNYEQPRIPQKMESSGLIDTDLAFFDYPGRYIEPSQGLVRADELMAESVVDNYQIEAASNVMRLIPGYSFILDKHPRRALNRDYTILTVTHSGYDPQVHEDEANEMPTTYQNQFSCLPRDIEFKAPKIAAPVVDGPQTAVVVGPAGEEIYTDKLGRIKVQFHW…
1	1163	GC_00000026	conserved_T6SS	emors_10_3	81241	37.1	38.2															MVRLQLTNSIEVTGAIDENSQAESLACVPRFGKVISLHPTMPDRIYVEFDGLATGSTALAKIGRLFRKSELEFAIESGLTCRIEFLNGDITLPVLTDIFFSLLDDDQPVILRAQSLIIEAENELIVRSGATQTKYSGRDGRVTTQAKYITSQAEKAQKIQGSTIAVN
1	1199	GC_00000027	conserved_T6SS	emors_10_3	81241	37.1	38.2	K11911	type VI secretion system protein VasL									45.287	3.99e-124	WP_011105827	type VI secretion system ImpA family N-terminal domain-containing protein [Vibrio parahaemolyticus]	MLGLKFNMNLSDFARRPISIEMPSGINPNSLDDFSEIKREVNKLNTVTSKISWKHVFKLSKSILETESKDIRCACYYTVSATHIDGLKGLVNGLNALLDICVIYWHSGYPDVNKTTARMGAFEWLTEHTIKKQKTLKISPTDLVLIETGHKLTLKIEEELRSHYGNKSPSLGAIRRIFSQWIEEIQTTKLSLEEQRLKKEAIEKQNNSGINVNVSLPPRDESKKTAQPTMTHTEKDKNIKPMVTISLAFIFILTLLFGHFLYADNQKSTLLINIQKADLTTINPLISQLENKEDDLKQYVKTALIKQALHLNKDWEVTSTKVDKINELETLNHSLKNLYSDSAAVKKLEYEFNQQRADFENEYSDIHRRFLKSRTIFANAKNHNSDENIVKAYSYSNSL…
1	1235	GC_00000028	conserved_T6SS	emors_10_3	81241	37.1	38.2															MSIYQHQYILDSDIVVPTGMNTELAIAIARADIDRFATYEDGNEKYTIASLEFVDQTCLMTKVQETLNVLITPLLDRLHISLKPLPLLLSVPHEISEHDLRNWIDESDFSDYLSNIKFSKNSGNAFLQECLNSLTEPDAIMCIAIDSLYEKKEALMSSRDAMSGTNPWGVLPSEGGAGMVLTKRNVLDTLKLIPQSKIVYSQFDWHSSDRRGCARLIRAASKHHDNLGPIYSDMTNQRAHTEDYGFAIGARSEVIPCAQQVTLTNEFWGTIGGGSGITTLATMNHLSTVGVLSTAFLFDQNNTRSLFILNREK
1	1271	GC_00000029	conserved_T6SS	emors_10_3	81241	37.1	38.2											30.526	2.22e-17	WP_138184353	serine/threonine protein kinase [Paenibacillus alvei]	MSELQGSTNDFINQLVVKAIEKKKKNEQTLANKLKPRLEHVLFSQFDVLETIESYNQKTTLYRLAKKDEPEKQICCKVLNSEQPEHVQEMFVAEATHLEVAQHPSIIDFIKLGNEFERPYFMYKWAEGESVAEKLTRHKYKSFRHDHIAWLIYQLAGALEYIHTKGICHLDIKPSNIIICEDDSIKLIDFGAAQYINDSRKYNEASLSYASPKYIESGKAVPQDDVYSMALLVCALFTGYSDNNDWKALLQQRKRPHTIPKTVWNLLRLVVTKPRTHGLTPISFAQALAHIDISVMQGSHNAPLFAQLRNADLVLRKSSKYDVFRLGRFKYLEASLAACLCLITFTVLLKSFAFTVADSNAVSLSDTSSRIKPAQAATFLSQPPWEIENALDNNSSDVV…
1	1307	GC_00000030	conserved_T6SS	emors_10_3	81241	37.1	38.2															MNRYRYLVDDVKKTLTDADKQQAIADIALAQEQLSSFSENMVNFLYTKAILAAETASFYIKQQYRFHQNGYPAKEIDYLTLLETQLSEIEKVFIALLRIHRGFVYVVYSEYPEVLAWLCLSKNIESQHDNDELTLLGISIIDQLDPELAMSLILRSNSNHIHKLLARFIEGGASKRELYYRCLVINQSVSVSLIKHWLEDKKLPEKMLHSYLVLMNVGSSIEWLQELTNADDLLFENLILKEDRSTWFRQQYSVDTISSETANTYSKLLTLKEFSLFDIEKEQAVIHFILSGDTELVPLIIEHLMQLDEVDAQLWCEGLFLVYGEEFPFLPSKLGNTIEWQDALHEIVEWQEQIEVVKPVPLRMGQKLTFDASIKAMKSSELSSSLREWLWRELCIMSR…
1	1343	GC_00000031	conserved_T6SS	emors_10_3	81241	37.1	38.2	K19304	murein DDendopeptidase [EC:3.4.24.]									34.545	5.48e-41	WP_116986330	murein DD-endopeptidase MepM, partial [Escherichia coli]	MKLKYLTFISINLAFIILSISLLYFSSNHSSVINGSQLSTSPQKNVFDEKKQKPDNLVINGTINDSFFSSALNAGLTSKQIFSFTEALHNSVNFIDGIEDGTPYSIVLDKDTSHIRSFFYTENNRLHTIQLANNGSYYNELGVNLSSNKLILPTGNLFRISSHFSKERKHPIVGIVQAHVGTDYATPIGTPVMSVSKGIVSRSEYHPLAGNFISIKHNNGITTRYLHLNDRYVNKGDHVYKGEMIGKTGNSGRTTGPHLHFEYIVNNIPQDFTKLHNDIEMPLNNKNQKKLLKCINLSKTLITKILKEA
1	1375	GC_00000032	other	emors_10_3	81241	37.1	38.2															MKKILLLALFSITLMGCNDPESVAAEASQLRAEQHPDRTYVGEHNYYIMESSEHAAFGRKKELKVMYQDFPRYFVEKAKEWPKEDLNDASSYDLPRFQFAWANSSSKDEYESGLKIWSMKTDGTDLRLVTDVTVELVNGIKNLTRSPNNRYVAWADLGGYKTVYDIKTGKVVELSIAMSPLPMLWSEDSRYLYFERARNLYSRWDSMTGEVSKVDLKIRTEAVLTEDKIIKVTDAAVVGYNLKTNERLFVLSSDRSLSDKERIFNVKSISPTGRFAWGSNQDYGWLFDTKEQTMKQMVDDFVPAQILGKDAHYSALSKMTYVTIVDRVEDKVWSWRAFSHGAMSGEGILYNGLANNGLWFKEDK
1	1412	GC_00000033	other	emors_10_3	81241	37.1	38.2							EFF01293	41.421	6.8e-153	NA					MHFNCKLIPSSSLSHKELEYILTPDEYVRLLSRGKNSQSIINQLPVQLRQSLSISASKSVQSLLFSLNQKLTKAEWIAVSTTIRKTGVSDTQLAQYPQLKKQIDRVETTQPAKFVKANFKPVTDDVPLVRNLLFTPVEPSPEHKISIEFAGQWPNNAASLLLAKSGEQKEKIAKPRADIHASHRSIATFKDLEPELRNLYLTIPMNGTPQPLKLLLAENIQPVDKETEMDEWDTVLVPVVPMKKLGEEYSLHQTGYFYVIWNGKVWREITIDSNGYFCDLDIQHERQEPLLTRHVNINASEFFPEANMSFEKFELYQEGQKVFSGELDVCEQSRVFNLVAEEVELKFVDFDHDEILLTTFESPIKNNASNERQAMSYPMPHVWLPYKLLGEVQSDCYVY…
1	1445	GC_00000034	other	emors_10_3	81241	37.1	38.2											32.11	1.25e-05	WP_005483532	OmpA family protein [Vibrio]	MSALKTYDHGIYLLGAYFKSYLDEEGERIEATWHQSSDLTEADLHNVRPIPFTPVLVDDAEKPVLWGANKDGLLCQLGYFDENTVPETIAKKQTFLRHKAPLTVNELGESQSYSLIFPPLNVIGQLAETHTSVKALNESLKDIYSTKLLPEKPDLIQFTISKISVEQLAKPYKQEPDKPLTDEQNDYNDWYENIKKSQVTEIQGIITPAFHSIGVVFSSDLYVGAEVSLIQVKSKQDSSGKAEKVLAKSFVTKEAPKKEQTQEEQEDSKKILPSVVFNFDPTLIDDGYFLLRTHFWVKDYLDKQKEFLGEEVEATFPDSVKQGQLKFKANDTRPGTDFTQDVYTYELHEKVTFKPISGFGKLAMVCGDLISLEECLIYQYPTALPSYSDFMTQQGNPVA…
1	1476	GC_00000035	other	emors_10_3	81241	37.1	38.2															MFFHQPTLTSLSLPPLQHKKTITLVILTIISVRLKITNRIESAHNKFYKNSMAIQFTSIVESGRFKDRKFARLVLNTIILIIVLMVMTLEILDDYDILDIFNDIQDNIIAFTTLCYMSALYSYGYQLPLFKHQWQVFLILYLTLAQAVYVLGYLTYTQYDQHSIIYLLSYGLFWSLFYGYLIYTINNLKNDIK
1	1507	GC_00000036	other	emors_10_3	81241	37.1	38.2															MNNEYHILSKSVFSQFLFQQTPKPIVPVEPDLLLEMTFSPKLFIINDIAEKVENLVQHGVEWLDARVDCSPSQPTDEQIKVFENFRMPYIHQTYRLTNEEKQYGKLNWLDLNSVNLDFSRLNNIPLEERLIFKLEEDFGYVFLHESVIELLKKHVKDVWVRDV
1	1529	GC_00000037	other	emors_10_3	81241	37.1	38.2															MCKQTNYSKYQKRVIKFLNDLLGADTPFTYERANNNHLKVLIDGVTKPLFTGSTPSDCKSINNFMAEVKRELKASKKEESKLSQPEKTGVVSAITLSNDKLIQNCVKSLRTRITVLKEQEKESVLNNKCINGLNLKRIEIVKHSVSLALQARKQGTYLKPKELRTIEGMVHNHLNFMLPSMAYYAELLNSTSKDKLAKVQPNKQQASVHNESNKNNVISLEDKTQHAPTKEAKKLAKKPKQPVSNKNMNTKNSNSATELMAMSANNRVSLLRNLTKAQALMLIDDINQAMAANREEDIQAVIALIRDKDLPLDAIISRMEAA
1	1555	GC_00000038	other	emors_10_3	81241	37.1	38.2	K19135	CRISPRassociated protein Csx14									29.801	3.78e-19	WP_116935424	CRISPR-associated ring nuclease Csm6 [Verrucomicrobia bacterium]	MKNILIAVTGASPQVLTETIYALHTQGKPMPEVVYVITTEDSKQTLKEGLFVQGYWDKLMTDYQLPPIAFNSDHIWVITDDNGNALVDAKGVDDQSIMADFITRKVALLTQDNEVAIHASIAGGRKTMAFYMGYAMSLYGREQDVLSHVFVDDEFEFVSDFYYPTPVDCFIQGKQVEAINAKEATVTLAEIPFVRMRRQVDECIINQMETHSFSKTVSALNSANNTQVRVSISTKEKTVEVAGVKIPLTSKHLAIYLFFLSKDNRKATLDRYFEDDKTQTTDYLGVLDKMKADVRLYKTMGLEDEGQWRQKDHAELATLTKDFVRQSLNGLHKSLKDKLVPDLFEKIKVHSDGVKSGATYLISPEVLFICDGIEL
1	1585	GC_00000039	other	emors_10_3	81241	37.1	38.2							EFF01536	48.843	1.1e-108	Toxin PAAR-like domain	45.361	3.42e-18	WP_119719572	hypothetical protein [Klebsiella pneumoniae]	MGVTVAANGLSVVHQGSGGEANATLPDVCLTKVGKPIVPIPYGNNAKSADLAKGTTTITMDGGNPVAIKGSTFSKSTGDAGGDKKGVASGTIEAEAEFISASPTVKFEGKGVCRLSDQMTMNKANTMCLGGAQNPSVSVTAEEEGTYTVDLFLSYSDGDPVQGAIYKLVDQTGAIFEGNLDTKGKASISGIAPGEFDIEYGEDSREFTPNIPTKENPNYNPNASAQMLIDETKRGEIGFWESSWRKTAGAVSWIWGVILGDFNDDATVEQIIANTAITMLPVVDQAADVRDMVANTMTLLNEEERDKPENWLALSLTLIGCIPVFGSAVKGTCKVALKSGKATSKDDLLAIMRAMGKGDPEKFLRTLDWADYAKQTSQIISDVLQPCIEVATELASYAN…
1	1611	GC_00000040	other	emors_10_3	81241	37.1	38.2															MNYSVITENYFSAKTSFSCIDSREMLYSKNNYEPTSSINPIIWEDSNGLIKDITHIIDNGDLCVSEEFAQLIMSFDPYGIETYPAKLILSDGTIQKRYILALNNIIDVMDREKSITEISPKRNKILVQALYLSEEKLLTYPLEKRILFRVKGAEIATFYSEDIYDLINNNERFNELRKIILNTSQEAPTF
1	1678	GC_00000044	other	emors_10_3	81241	37.1	38.2															MSIQKRKGKWERSSLGHIDSKRKAHPLNFKAKSIAAHHLISCEVASKLSSIRKKQIKYKGYDINHPYNLVFLPMIDQISCQYNVPLHKSGHTDSKLEAYYAEQSGSNINDEVSNLISERDKETNENKLSLLQGDIDMLNNLKGYHRIVGSMLAKTLKSLDCDDNSDDFVDSLDELSFDIATKLGRFQLHLISRGRHMQSGQDGCHYCRQDGNRNKHYHVTDNIPTQDYVKEYCYKGLRLYTVQEKA
1	1732	GC_00000048	other	emors_10_3	81241	37.1	38.2															MKMTDTKKHAIKRLILNNHWEFETRTISKNGKQEIGAYSGNRTRIISLEG
1	1812	GC_00000056	other	emors_10_3	81241	37.1	38.2	K01154	type I restriction enzyme, S subunit [EC:3.1.21.3]									37.442	1.96e-81	WP_118017750	restriction endonuclease subunit S [Coprococcus]	MSSLPKGWVETDFDNVIDSLTNGISDKQNKESNGIPVSRIETIADQTINYSKIGFVDNYDDVKAKKYLLNEGDILFSHINSPIHLGKTAIFDGRQELFHGTNLLRIVVNKRVTLSSYFNYYCKFTRAIGAFSLNAQHAVNQSSLNQKKIKAFSIPLPPLAEQKRIVEKLDEVLAQVDTIKVRLDGIPSLLKRFRQSVLASAVSGKLTKEWRGVGSEPFGKQVKLGELLKDGPQNGLYKPSRFYGNGTKIFRIDSFYDGELVDWETIKRVDLEEQEVDKYRVNIDDVLVNRVNSIEYLGKCALVRELPENAVFESNIMRMSIDTEKALPAFVTTFLRSIVGLQELRKNAKLAVNQASINQTDVKNCLLYLPKIEEQKEIVRLVDQYFAFADTIEAQVKKA…
1	1821	GC_00000057	other	emors_10_3	81241	37.1	38.2	K06940	uncharacterized protein									46.25	3.26e-21	WP_117611299	YkgJ family cysteine cluster protein [Bacteroides ovatus]	MPFPCTGCGLCCQQIHNIVELQEYHSGDGVCIFYQKQQCSIYQNRPIVCRIDDAYDQIFKTRFTIDEYYKENAKICNQLQMNAAMDAIYKVRL
1	1829	GC_00000058	other	emors_10_3	81241	37.1	38.2															MAIPWLIGAAVVGLVGSAIKSSIEEDEAKERQERWEREERSRLRQEEQERIDNARKDEALRVQRQIEKEKKALIHQESMRLMEKYEISDLSSTEFKSYISNIIVNGVSDSTSEIEKILSSSKKMIEVKEEESQLEKQLKELKEIQRYLESI
1	1837	GC_00000059	other	emors_10_3	81241	37.1	38.2											28.804	6.55e-07	WP_117586042	50S ribosome-binding GTPase [Prevotella copri]	MKLDISIMSEKFQHSLSRLDKIIYSDQKPRIAVFGKYNHGKSTLLNAIFGYEAFKSADKRETVENLSIEHDDVMWIDTPGLDADVHGKDDAAALTGAFEMADYLFLVHQVTAGELDKYELDIFNRLALNTTDYSQKMCLVLTQIDQKTGDELNTIIDKVQQQVSLESQFKEVKIIPISATRYLRGLEENKPIFCEKSGISTLFDEIEKIKNNVIKTREKEKFELINKIAHSLNEMELAINQEMNINKNKQVSLKSDITCELNKLITKVA
1	1845	GC_00000060	other	emors_10_3	81241	37.1	38.2											31.967	1.06e-06	WP_117586042	50S ribosome-binding GTPase [Prevotella copri]	MLTAFAQIKENIITSAPLINKYRDINEVKKELFDIIDNDTLQIMLYGAYNAGKSTLINVLLGEELAVVNDIPTTDKVDEFNWCGYKLLDTPGVNAPIEHEKTTNEQIKRSSVMLFVIREGDQDSKDLYIRLFEMLALGKKVFIVLNHQLTNDDDKAMAYKKIHSIVMSQAPKYGIEDKQIRELVVCPINLKTALNGRLNQHDKLLDHSGYTNFISLFEQWVKMNDAEQERLEHAISAVNTLWYMPTITELKQDGTDESNDALLNFRQDLAHLQARKKGLILESREMISHNVRLMKAQISQTLTQSTNQIELDTELEALISPLYKKVELWLEESLSHHYSTLSCDVQHTLKQASEDKNNPFFDSMLNQAKTFFSDEKTIKQGLLYGRKFKIPGLKGRWEK…
1	1861	GC_00000062	other	emors_10_3	81241	37.1	38.2											40.996	9.98e-51	AAC46428	unknown [Acinetobacter baylyi ADP1]	MVKNENVFVTSLRDFTGDFVLVNNREDELTKMQFEFESKIKKTLENSNGKLKKESLLFSLTDALKVSVLNGIKEWNEKLIDSLPMKKLSEEYSDRIILLVFGKVNAGKSSFCNFITEQFPNEEIKRFCFVDNRIEYFEQSFAEGVVETTATIQGVEIGRDFVLLDSPGLHSIVDENGDLTRRFTDSADAVLWLTPSSSPGQVQELTDLKLELEKKKPLLPIITRSDQLIEDWSDELNDLVHTIVNKSESIRQLQEVDVIERVKALGNVDDLKSAISISIHAYREHQEKENAQSQAGLNRLFSSLSDIIHEAKEYKVEKANQQLINFINDNVLSTLEKDISPQLLKLKDQTQKTLDDLKKKESLIISELLTTVKSQVRGVVEQHSASQDKVAISSGLNQL…
1	1915	GC_00000069	other	emors_10_3	81241	37.1	38.2	K01153	type I restriction enzyme, R subunit [EC:3.1.21.3]									70.374	0	AAA97247	CG Site No. 620; alternate gene names hs, hsp, hsr, rm; apparent frameshift in GenBank Accession Number X06545 [Escherichia coli str. K-12 substr. MG1655]	MQKSNFEFLKGVNDFLYAIARAAENNFPDDPNTTLVKVRIFGEATAKHLAKLLDIEAPDNQHELLRELGKIPFVDDSILTVFHKLRKIGNKAVHEYHNDLQDAEMCLRLAFRLAIWYYRLVTKQFDFAVPVFILPSSENKAQFEQEMHSLKQELLLVRQGEAQTKAEIEAQNAKLTALTGYISVLESKQEETQGQTQERIAALEAQLQRKDEEIAKKTEAERKAYKKQITDQAASRSLDLSESESRYLIDNQLRKAGWDADSKLLNFANGTRPQIGRNIAIAEWPTGKDETGKTGFADYVLFIGLKAIGVIEAKKANKDVVAKLSEAYRYSKYFDNDFLRNELQYAANDQTALDQIAESLPTYLPTWSDSSNSEPYKIPFCFSANGRAYRSAIKTKSGI…
1	1922	GC_00000070	other	emors_10_3	81241	37.1	38.2	K03427	type I restriction enzyme M protein [EC:2.1.1.72]									49.315	3.6e-161	WP_117017508	type I restriction-modification system subunit M [Aeribacillus pallidus]	MNNNDLVAKLWKLCDNLRDGGVSYQNYVNELASLLFLKMCEETGQEDDLLPEGFRWADLKAKIGQEQHQFYRNMLVQLGADDHAIVRAIFQNVNTTITQPAQLTELVSNMDSLDWYSDEDGDKGKSRDDFGDMYEGLLQKNANETKSGAGQYFTPRSLINTIIKVMQPQPREIIQDPAAGTAGFLIEADKYIKSNTDNLFDLPDEDQEFQMKKAFVGLELVPETRRLALMNCLLHDIEGDENEGAIRLGNTLGSAGENLPKANVILTNPPFGSASSTNITRTFVHPTGNKQLCFMQHIYDALEPGGRAAVVIPDNVLFEGGKGTEIRRDLMDKCNLHTILRLPTGIFYAAGVKTNVLFFQKGTPENPSQDKDCTKETWVFDMRTNMNTFGKRRPLTEKH…
1	1937	GC_00000072	other	emors_10_3	81241	37.1	38.2															MKPINYVIAFLFLFVQPSYAFEHSNANPGSAEFLIAACQEYTELYNKKDEQGFGTFFTTSKEESFRAGYCLGAVMHTNSKCSYPYTYTPSVYQAAKVIASVNVKQRYSETKLLEDAVCR
1	1943	GC_00000073	other	emors_10_3	81241	37.1	38.2															MIRSGNQYGCHFRFNNIKNKIRTLARVMQKNISTASKIWHGTKLFIKWFWLMTMFLLGVSLLLVMPLIMFEYSFSLSELDLIETLFIVFLVVFIYQYGKRCRQIDTPLVRKIITPWVHQAHIFLVFYSLTLISAPLLELNLRELERMPLLDLFGYILMAGTFGYSYYRIGLFAKKTVETVEVITTEGAVE
1	1949	GC_00000074	other	emors_10_3	81241	37.1	38.2	K15045	radical Sadenosyl methionine domaincontaining protein 2									40.418	2.33e-71	RGE41128	radical SAM protein [Comamonas testosteroni]	MNQANQLVINYHITEKCNYDCHYCYAKWAKPNELHRNVDDMKKVLSNLAEYFLSPNPIQKQLQYQSVRLNFAGGEPLLLKQRFIDALDYAIELGFEASIITNGHLITDQFIIEHSHKLQLLGISYDSYNAERQQQIGRVTPVGKVLSPERLQSIFKQIKRQSPTTELKINTVVNQYNTEEDFTDLITKIQPNKWKVLRVLPVFDSIEPIKDQQFDAFVERHESVAHFMSAENNDSMTNSYLMLSPDGVFFQNGNDELGYFKSRSLLTTPVDIALGETGFDAAKFAQRYQ
1	1955	GC_00000075	other	emors_10_3	81241	37.1	38.2															MSLVTTNQAVKDLFGIEGSEPLRSKANSYLRNGVIPSSLVIDDGFSDESMGKRGKKLLKSQAVNCLFNALVLDAFFNDTKFVKAIFEQSRTRVASVALCEEVLLKAQAVATVSHLSNLAQQFLSQLKDESFNLREYRLTCPFDDQRLPQMDMALQNTGLLYQLLRAQRLSLSHKEQIWLCWLEQDLAAASQLADQVDSALLETDMALKEMVKRAHKEYQEAQSFNALLSSLPD
1	1961	GC_00000076	other	emors_10_3	81241	37.1	38.2															MNQQQITVKSGAKIKIITPKAPPLIINRAKKLISKIFVQDILRGMRPKVIQRNKKWLSYRVNRKYRLLVLRTRCNTGPYYCLSHTEFDHWVNNH
1	73	GC_00000001	flanking	emors_11_1_cat	106272	37.8	38.1											47.917	1.71e-27	RGC81918	PTS fructose-like transporter subunit IIB [Hungatella hathewayi]	MKIVAVTACPTGIAHTYMAADVLKKAAAKLGVSIKVETQGAMGVENVLTPVDIVSADLVIIASDIEIEDKNRFLGINSKQFPIETILTDVEGILKKHLF
1	74	GC_00000001	flanking	emors_11_1_cat	106272	37.8	38.1	K11203	fructoselike PTS system EIIC or EIIBC or EIIABC component									61.453	0	WP_117709256	PTS fructose transporter subunit EIIC [Fusobacterium mortiferum]	MDITSLINANVICLDLKSTSKEDILQEMVQILDDAGKLSNKTQFLADVWAREEIGNTGFEDGIAIPHAKSSAVLTPSVAIGISRTGIDYGAEDGEPSDIFFMLASTDGNDNQHIEALAQISSRLIEDGFTNKLKKANSKEEILDLFTDIIQPNTESTDIENTPPQTEKSELTRKLGRTKEHLLFGTSHMIPFIVAGGVLLSLSVMISGQGAVPTEGILADIAQMGIAGLTLFTAVLGGYIAYSIADKPGLAPGMIGSWIAVQQYNTGFLGAIIIGFFAGVVVRSLKKIKLPESMASLGSIFIYPLVGTFLTCAAVMWVIGAPISNAMAALNEWLASMAGSGKIALGAILGAMAAFDMGGPINKVATLFAQTQVNTQPWLMGGVGIAICTPPLGMALATF…
1	174	GC_00000002	flanking	emors_11_1_cat	106272	37.8	38.1	K07001	NTE family protein									30.926	1.06e-100	WP_119143698	patatin-like phospholipase family protein [Pseudomonas reidholzensis]	MIILIWMVIMRHVFRLNLWFVFFATFLFTPYLYAEPIQEMPRPKIALVLAGGGAKGAAHIGVLKALEELNIPIDIITGTSMGAYVGGLYATGKSASEIEAYLHTVDWYSGYQDEVGREEKNIRDKKYEDRFAINPSLGIRKEGVKSPKSAIQGQNMLKILRETSGNPVSVASFDDFPIRYRSVATDIVSMEEVVIDHGLLVDAMMASMSVPGALPPYEFEDKLLIDGGVTNNMPVELAKEMGADIVIAVDISSNYMTKEQIGSLFDVASQLTNFMVKRSTQEQAEFLTDKDILLQPRVGDIETTDFSSMPRAYQEGYDTVMMLKSRLQSLAVTPNEYAQYSNKIKQQSANVRLAQGAIIDKVEVENRSHYESDKLERFIQFEQGTSFNSDYIEDKIHTL…
1	243	GC_00000003	flanking	emors_11_1_cat	106272	37.8	38.1											30.097	1.17e-08	WP_116986099	phosphoenolpyruvate--protein phosphotransferase, partial [Escherichia coli]	MELNTIDYRITFFVKDQGLPPQVASQLTRLAKKFKSLVYIDNITQNRSTNAESSLGLLQVGLCPGDFCQLITVGMDAEWANFVLTDLLSSTFDFVASDKLCDFSETITNTYPQLTPQCEVDFHYVKAQAVLSKFEILKGLSQLIYPKESDELLLALIKREERSSTAMAKQIALPHVISPYVEKPTIAIIRSDYPVDWASKMGDVNVIIALVLPEKPTKEMIMAATYLTRSLLSEDFSQRLVHTRQPKGLQALILYAMCQLL
1	311	GC_00000004	flanking	emors_11_1_cat	106272	37.8	38.1	K01809	mannose6phosphate isomerase [EC:5.3.1.8]	M00114	Pathway modules; Carbohydrate metabolism; Other carbohydrate metabolism	M00114	Ascorbate biosynthesis, plants, fructose6P > ascorbate					62.148	8.35e-173	WP_005478337	mannose-6-phosphate isomerase, class I [Vibrio parahaemolyticus]	MNALKPQTFYPMTNVIQDYAWGSHTSIEALFDIKNNTGKPQAELWMGAHPNGCSAVTVNGDSVLLSDLINQDKEAFLSKTTADAFGELPYLFKVLAAEKALSIQVHPNKQQAVDGFEKEEKTGIALTAFNRNYKDNNHKPELVYALTDYKAMNGFRDYQEIVSLFSAMQLPTIASYVDELAQEPNSNGLQHFFKAILSLENEAKERAVAELLDYASSSTDELFVLLQDLAIQYPNDVGLFAPLMLNVITLKPGEAMFLSACTPHAYIHGTGLEIMANSDNVLRAGLTPKYMDIDELMSCTEFVSQPLSLLLTQPNTVDGGMSYPIPVNDFKFSVFTATDALTLETNSAEILFAIDSDLTLTHENGESVTVAKGHSVFVPAYAKRYSLTSSGNVARAYN
1	377	GC_00000005	conserved_T6SS	emors_11_1_cat	106272	37.8	38.1											50	4.59e-11	P96156	Chitodextrinase; AltName: Full=Endo-chitodextinase; Flags: Precursor	MIKLNKITAAITSVMFSGYLYAADASATSNVVTFVPGETKVQNGDMVSFNGDCFVAKNNPGVWESPTADSWFWDVAECSGEPNPGPGPNPGPNPTPDPDLGDIIPFIPGKTQVENGDVVSYENQCFIAQNNPGVWETPSASSWFWTLTECSDEPVNPEPEVTELSILAPTAGQVLTANEAISINAHVDGNLAAKVEFWANNTKLAEKTVNQNNTQYSQTWTPSEEGNATINVFVFDKNNQKIEQKSVSVTVKAEVTEDFVAPVVKFVTPANGSTMNVAESLSISVNATDADNDLATLVVKANNKEICSFDAANTDTFACDWQPTQAGNVTLNAIATDAQDLSSTATVRITVEEDVVEPPVEPPVTPGDLCKDFNVYPDWTRGDHATGGDIMVHDNIAYS…
1	431	GC_00000006	conserved_T6SS	emors_11_1_cat	106272	37.8	38.1	K11892	type VI secretion system protein ImpK									24.8	1.8e-08	WP_010910863	type VI secretion system protein TssL, long form [Mesorhizobium japonicum]	MSYVEDDVTVVLFQPEPGKPMEVMPAPDLSRNISVSELDISSMGINPLVDQFSWLIASLSCMSSIPWLDDPMPFREQVAREIRKGERMLNEMEVDRASILVIRYCLCAAMDESVCRQEWGANSNWSQNSLLSEFHNETSGGDKFFVILDRLKADPRKYRHVIEFLYLLLQLGFKGKYGRAERGAESLTEIGNTIYRLVRDERLAEQEKVALVDVKSKYLKKPLKRVLPPKLILGVSALLFAAMYAATYLVIDVRFQKLLSLYQ
1	470	GC_00000007	conserved_T6SS	emors_11_1_cat	106272	37.8	38.1											41.849	3.05e-99	WP_011105819	hypothetical protein [Vibrio parahaemolyticus]	MVYVSRCHLFTNKYNACSLITTTRFYIFMRIFSFLKLCAGLGLILLISSCGGESKDTSPPKRETTSVSGILFDAPIAGARVVLWEYVNGAIGKKLGETRTSSKGDYSMEVNSGSMPVLLQAFGGAYTDPATGEVVYEGDGKTLKFESTAYFYENKANRIMLTPLSLISKGLADYKIHKLGMNAEGAIDSANSTISNMYGFDVITVEPIDIVKGGQSAYVTAGHQYGAYLTAYSVFSSDLIKKYPASDSSSIYTSFTLSDIMYRDISADGQLDGYETDNISGLDKKISFGKESVSVETYTNILSQYILITVNNNRLNVSGTNPNDYKPFASKVNKLGTTPETMTVFPPRTEVPIDDTEPTVERSDKDVLVRLDSLDLLVKDNVGTKSLRVSLQYQDDLGW…
1	509	GC_00000008	conserved_T6SS	emors_11_1_cat	106272	37.8	38.1	K11906	type VI secretion system protein VasD									26.984	4.76e-15	WP_010910850	type VI secretion system lipoprotein TssJ [Mesorhizobium]	MRKLLTFSLIFLLSGCTMWDQFKESTGITPETSSIELIITADKVLNVREGGQSSPVILRIHELNSPVLFRNLDFFALFENDKDALGDEYIKRYEYQIQPGDVVHETLVLDPATRAIGFSVAFRDINGSSWRKVELIEEKSEYFLKLNLKESELSSNNTRGIEQIYF
1	547	GC_00000009	conserved_T6SS	emors_11_1_cat	106272	37.8	38.1	K11893	type VI secretion system protein ImpJ									32.88	1.6e-83	WP_005463797	type VI secretion system baseplate subunit TssK [Vibrio parahaemolyticus]	MSLYNPVVWQDGMFMKPQHFQQLDRFQGKQSGMLSGFESPLHWGIKRIEINTELLALGKIGITHAEGILQDRTPFDLPLHASLPEVKDVDASVANKVLYLCCPLPSERSELFGTSKDGARYSIHTQDAVDACYDSEEIANITIGKLNFCLMYEDEDKSAYTSIPILKISEVKPDGSIILDNAYIPTCIDINASTVLKKFTTEFASMLRHRAESIVQRLGVVDQQGVSSVSDFMLLQALNRYEPLFWHFANIEGIHPEAFYRVLLQAEGELATLCSSSRRPQEFVPYNHGNLTSCLSTILHNSKVTLSVMSEQRAIPLPLKEQGYGIRIAPISDRSIVESTTFILAVKADVTLDILHTQFVSQTKIGSIDNIRELINLQLPGINIKPMPVVPRALPYHAG…
1	585	GC_00000010	conserved_T6SS	emors_11_1_cat	106272	37.8	38.1											66	3.26e-97	WP_011105828	hypothetical protein [Vibrio parahaemolyticus]	MAKPIQLGFMALIMACSLPAFAKGERYGIAANFKTIESTEYEQGMSGELSTISYGLVHTRPIDENNNRWRWLFGFNYLSDYIEAPANGVYQEVTNYEFRIVPQYALGNWWAFTPYVGAGLSLGYSQYGNRWKVDDEGYKYGNQLDDIDQFEVGAVLSFGTVIKLGSNPDAHLQIIPQASYIQPIYNDGLGGLELSVSLLF
1	623	GC_00000011	conserved_T6SS	emors_11_1_cat	106272	37.8	38.1											39.706	0.000425	WP_117539334	FHA domain-containing protein [Coprococcus catus]	MHLNQLTLFITKSPEEYTGSKHIEMPEGGGSLGRNPSNTVSLVDHNRFISGSHCLISIYGDTYYLSDVSTNGTLVNGNKLLKNQPISLYDGDTIVLGRYEISVGLEKLSNSVNIAADISEETDSTDPLVNLAEYTPDEEQDKGNIADLFKETRIDKVDSSDPVAHLNFITQTNNDDHLLHGNEKKHEQKITEPVHTRQLLDDSDSVHSEFDIPNLIPEDWFSDDFSNSLNSTQSINEEIGSAPSIPDPIVQPAVELTPEPVVSPASEQQSWEDVTQTIQTSSSTIESTNDDFFAASSMSTDVYSSPMQSIEAPYSSKTEDAKNAFYKGLGMSAAQIEQTDEQFFQQMGNCLRLCINNLQKELSELKAIKNNEQDDSMTNIVELMLSLNHQQLLSPNELI…
1	660	GC_00000012	conserved_T6SS	emors_11_1_cat	106272	37.8	38.1											30.882	1.68e-20	WP_116949140	Lrp/AsnC family transcriptional regulator [Jiangella endophytica]	MSNMNLQGLDKLDRRIISNLLSNGRESIANLSRNVGLSRTAVAERINRLEKTGIIKGYTAQIRMGNKDENASSYLLISCNKGQKDSVSDGLKEIPEVKMTSIVGGTYDIICLIEAPDLHRIHYLCSEIESLSGIKEVKNTIVLHQPVCR
1	696	GC_00000013	conserved_T6SS	emors_11_1_cat	106272	37.8	38.1	K11901	type VI secretion system protein ImpB									40	2.67e-32	WP_117580760	type VI secretion system contractile sheath small subunit [Enterobacter]	MSRDGSVAPKERINIRYVPATGDVQEDVELPLSMMVVGDFTARTDETPIEDRTPINIDKDNFNDVMEGYSPNVKVNVDNKLSDEEGAQLGVDLTFNSMKDFSPEAIAKSVPELNGLLELREALVALKGPLGNVPAFRKKIAAVLQDEEARQKLLEELNIGSAKEEAKAE
1	732	GC_00000014	conserved_T6SS	emors_11_1_cat	106272	37.8	38.1	K11905	type VI secretion system protein													MEKGYRLLERIELGEPKNCYEKVVSHKHLIESIHLHLADLLNTHAGNAMIDNDYGLPDFNDVLSNNTNLVRNIQQNIKASIEKFEPRMRNVEVHYRHDNNNPLQLGFGIGGEVIHNGGKVPMAINIFMGVDGQFNV
1	768	GC_00000015	conserved_T6SS	emors_11_1_cat	106272	37.8	38.1	K11900	type VI secretion system protein ImpC									60.288	0	WP_117611541	type VI secretion system contractile sheath large subunit [Escherichia coli]	MTAEAQAPEQEAALVESGSLLDSILNETRLKPSDEGFDVAKRGVEAFIGELLSTNTSDKVDQSLVDLMISEIDQKLSKQVDAILHNKEVQAIESTWRGLKYLVDHTDFRENIQIELISAKKDEVLDDFEDAPEVVKSGLYKQIYTREYGQFGGKPVGAVICDFQMSASSPDIKLMEYMANVGAMSHAPFITSASAKFFGLDSYEELPNLKDLKSVFEGPQYTKWRGFREHEDARYVGLCTSRMMLRTPYSVEDNPIKAFDYNEHVKDGHDNYLWGNSAYAMASKISESFAKYRWCPNIIGPQSGGTVSDLPVYNYESMGQIETKIPTEILISDRREYELAEEGFIALTMRKGSDNAAFFSANSVQKAKVFPNTPEGQQAEMNYKLGIQLPYMFIINRLA…
1	804	GC_00000016	conserved_T6SS	emors_11_1_cat	106272	37.8	38.1	K11903	type VI secretion system secreted protein Hcp									51.163	4.3e-64	WP_137712216	Hcp family type VI secretion system effector [Brenneria rubrifaciens]	MPTPAYMSIKGETQGDITKDAYSADSVGNVWQEAHVDEFLVQELDHVLTVPRDPQSGQPTGQRVHRPVVVTKQQDRCSPLLFNALVSGEKLPECSINFYRTSTSGKQEHYYTIKLIDALLVDMQTRMAHCQDAAMADRVTEEVLKFTYRAIEVTHETCGTAGNDDWRTPREA
1	840	GC_00000017	conserved_T6SS	emors_11_1_cat	106272	37.8	38.1											45.455	1.38e-07	WP_117031792	DUF2169 domain-containing protein, partial [Klebsiella pneumoniae]	MQLWDIDSELPFTLKGRFQRDSEGHEVWILSMKRAWTFLDGSWSEEVDNLELNDDPIYLGEPGFSAMVADHDFPIYKKNTDVLIYGKARSYAKKPVHSQLCRVLIDEHIDKTLKVVGERHWVDHSGSITVSTTQPFIERDIDYSNAIGGDERNRIGGGAAETNAELLKAKVPSIFYPDQNWQASSKKVKVAGFGPMPPFFHDRAKWAGTFDEKWFEERRPVWPLDFDARFYQSAPQDQQCNGYLQGGERLMVSGFCHNDALSFRIPSEKFQAVAVFNGKEEKINMPMYTLWIDTENKRIEATYTAAFPCQNREHLLTSSYLVELS
1	876	GC_00000018	conserved_T6SS	emors_11_1_cat	106272	37.8	38.1	K11895	type VI secretion system protein ImpH									33.131	5.21e-55	WP_000348794	type VI secretion system baseplate subunit TssG [Escherichia coli]	MIQYIVNKPCDYSFFQAVSLLEKHYQNLPGIEYKAIGENQYVKNEYIQFSVSPKLSFPKSDIEFISEFERNDAVYTQIEVNFMGLHGVSSPLPASYTEKLAGRDPDDNPVKEFFDFFHHRYISMLYRVWKKYRYHIQYKSDAKDPFSGRLLHLVGLSSVIQESSEVDLDRAKLLSYVNQLSTRTRSPKLVSGIVSHYFSLSNVYIEEWVYRRITIAASQRNCLNRKNCQLGGDFHLGQSMADLTGKFNLCIDDIDFDTYVKFLPGGALHETLIGLMKFILCDPMAWDLKLTVRNKSLPINQLGDGLGNELGQTFWLGTTKGEETKIKIVGSN
1	912	GC_00000019	conserved_T6SS	emors_11_1_cat	106272	37.8	38.1	K11914	sigma54 dependent transcriptional regulator									42.415	4.22e-78	WP_126397535	sigma 54-interacting transcriptional regulator [Blastochloris tepida]	MSLAKSDSLNNALLAISQSLADRSQLALTLDAILAAARQLTFADHGIIYVLDQTGQALLPSVVHHNEHILADHPWQPLTLESIDETDPFSFAIQNGEVVLINDLYQYNGYQCDEIYQNESILNRKSKNLLAWPLIDNEKNTVGLLVLFDLNVINDEASLTCFCQMAATNIRQAVWLEKYGYMIKELSEDNASLTRENNQLKQRKQSKYNGPIAESEVMINALARLNKVLLLPVDVLIRGETGVGKEVIAKYIHENSNRSKQALIVQNCAAIPEQLLESELFGHKKGAFTGADKDKIGLFEAADGGTLFLDEIGDMPLLLQAKLLRVLQERKFRPIGSNKEISVDVRVLAATHANLLSKIKKNEFRADLFYRLNVFPITIPPLRERQEDIIPLSEHFIKL…
1	948	GC_00000020	conserved_T6SS	emors_11_1_cat	106272	37.8	38.1															MKPYLLLLPAALIVTGCSNQTSVPDPLAPYKNVHIIGNKKQSIGSFNYLSKDVDGHTDKQVIVYFNEIPFTSTFNLCADKGVYIANCKSTVSIFPSKNKGVIFNYDLNFYNGSYPARVGSMNILLPSTTTRKMDNLTQYTSAKFSEEQFLESETLEEATFILMKSS
1	984	GC_00000021	conserved_T6SS	emors_11_1_cat	106272	37.8	38.1	K11891	type VI secretion system protein ImpL									22.863	3.19e-67	AFJ27267	IcmF-like protein [Escherichia coli Xuzhou21]	MIKNTLARTPFILSTVISAFFALLLVGVYYLWFNQADLRLLWGMLGVIFSIYAIFNLTLYIKKRKSKSHQNIETEEDTLSMVLKPLLNKAGKKPVYLVLGNKGSGKNQFLNVSNAIKPMDKVKNVKNDFFEWSESDSAVYIKPNHRLTFQEISSNDSLLWDALINEVIKHKPRKPFAGCMLLIDFEFLIVHDDEQTDYTLNALLQRLESIKETTGATLPLYLIMTKLDKLEGFKEYIHFSPLKSSVEFLAIPLKDAKGAILDYFRDSYKNIVKVMESNALDSSSYTNNPDEKQTILAFPKQFELCEKEISRIIERLNELNQGTYSVDIREVFFSSSLQGGRKYNLLAKSCSNYFNLPIIASEHGQLTETPYFTRFLVDAKVLPESDYSAENQHYLKRIQ…
1	1020	GC_00000022	conserved_T6SS	emors_11_1_cat	106272	37.8	38.1	K11896	type VI secretion system protein ImpG									32.414	5.57e-91	WP_117681754	type VI secretion system baseplate subunit TssF [Klebsiella pneumoniae]	MSNSKYFQDELTYLKEAGSEFAKYHPKLTHFLSEGTFDPDVERLLEGFAFLTGRVREKIDDELPELTQSLISLLWPHYMRSVPSMCISELVPHSGSVTEKIIVERGAEMASEQVEGTQCQFRTCYDVALYPLSIQQIEQNNSRTNSSLHLTIAANNGLELSRIKLDTLRFHLHGEQHITRSLYLWLFRYLEYVELDVGGGYKHRLRADQVVPVGFGDDEGILPYSKNSFSGYRLLQEYFSLPDKFMFFDLKGLEWLSGIPQRSTVKISFAFSRALPSEVIVKNKHFKLHCTPSVNLFEKDGDPIRLDHQLNEYKVRPQSANQEHYEVYSVESVESWSKAERCRKKLIEFESFEHQINQRDKRDFYKTKVSERVNGRGLERYISFHSHNNQVSELGSETV…
1	1056	GC_00000023	conserved_T6SS	emors_11_1_cat	106272	37.8	38.1	K11910	type VI secretion system protein VasJ									24.75	7.39e-25	WP_119144555	type VI secretion system protein TssA [Pseudomonas reidholzensis]	MTSLNVELLLKPISEASPTGEESKYEFCYELMELEIKKFGSLFGETVDWKVVETNAIEVLTTYSKDLKAICYLIRALIERNGFEGLEEGLNLLKQNLVLFGTDLYPQRKRARDGAMEWFVAQLETVLPKLDSSTTNWESVTSYLQKINEISDQYYEVFPDSEVEFYLITSVLNGISQRVVGAGETNTDTSRNTVCEPEPLVEETTSTVTEVKTPVQVVTQAPRTVNTVKQEVDIDTDFTSPSASKRTLKKVAEFMLHSDISTPLAYRLHRNCTWCEVDELPPHDNDKKTPLSLAVSQDQLSEYRDKAKQETEAEVIKRLERTLTDAPFWLTGHYLMFQMLTNLDHHEAAEAVKQETQHFISQLEGIELLTFANSIPFADEDTLKWLSSNTASVPVAVAS…
1	1092	GC_00000024	conserved_T6SS	emors_11_1_cat	106272	37.8	38.1	K11907	type VI secretion system protein VasG									45.504	0	WP_117580830	type VI secretion system ATPase TssH [Enterobacter]	MININLSSLIQRLHPITKVALEDAAALAVSERASEVQIEHFLLSLLERPNSDFDQLLAHFECSENLLRQAIKSTLENSHKSNGGKPVFSAMLIEWLQEAWLVSSLDLSETQIRSGALLLTLISNPLRYGQHGYSSLLENINPETLKRNFAELTSRSIESQVATSEQTHAREDGSALSKFTTDFTGKARKGEIDPVFCRDQEIRQIIDILARRRKNNPIAVGEPGVGKTAVVEGLALKIVQGEVPDCLKGVELYGLDMGLLQAGASVKGEFEKRLNAVLDEVKNSPTPIILFIDEAHTLVGGGNQAGGSDAANLLKPALARGEVKTIAATTWSEYKKYFEKDPALARRFQLVKLDEPSTEQAALIIRGLRAVYEKSHNVYVRDDAITAAATLSDRYISGR…
1	1128	GC_00000025	conserved_T6SS	emors_11_1_cat	106272	37.8	38.1	K11904	type VI secretion system secreted protein VgrG									37.455	7.97e-117	WP_002213876	type VI secretion system tip protein VgrG [Yersinia pestis]	MVSDIEFKFEVLGTEHEFRVESFNVVEELSKPFHVSLSLLSLDADITFDELIRKPALLSIFGQGVGTARQFHGVVNEVRYLGEGRRFSRYQITLVPQLWFLTQRQDCRIFQEKSVVDIVTEVLDGAAVTDYRFDISALYQTKEYVLQYRESDSHFVQRLLAEHGLWYYFEHTAANHTMVIVDKNDAIAELENTPLNSSYVGPVIYQADGGGNADREHIFDLESINRVRTGHVTHTDYNYEQPRIPQKMESSGLIDTDLAFFDYPGRYIEPSQGLVRADELMAESIVDNYQIEAASNVMRLIPGYSFILDKHPRRGLNRDYTILTVTHSGYDPQVHEDEANEMPTTYQNQFSCLPRDIEFKAPKIAAPVVDGPQTAVVVGPAGEEIYTDKLGRIKVQFHW…
1	1164	GC_00000026	conserved_T6SS	emors_11_1_cat	106272	37.8	38.1															MVRLQLTNSIEVTGTIDENSQAESLACVPRFGKVISLHPTMSDRIYVEFDGLATGSTALAKIGRLFRKSELEFAIESGLTCRIEFLNGDITLPVLTDIFFSLLDDDQPVILRAKSLIIEAENELIVRSGATQTKYSGRDGRVTTQAKYITSQAEKAQKIQGSTIAVN
1	1200	GC_00000027	conserved_T6SS	emors_11_1_cat	106272	37.8	38.1	K11911	type VI secretion system protein VasL									42.923	1.6e-121	WP_011105827	type VI secretion system ImpA family N-terminal domain-containing protein [Vibrio parahaemolyticus]	MLGLKFNMNLSDFARRPISKKTPSGINPNSLDNFSEIKREVNKLNTVTSKISWKNVFKLSRNILETESKDIRCACYYTVSATHIDGLKGLVNGLNALLDICVIYWHSGYPDVNKTTARMGAFEWLTEHVIKKQKTLKVSPADLVLIETGHKLTLKIEEELRSHYGNKSPSLGAIRRIFSQWIEEIQTTNLTLEEQRLKKEAIEKQSNSGINVNVSLPPRDDGKKAVQVQSISHAEKDKNIKPIVTISLAFIFILTLLFGHFFYADNQKSTVLINIQKSDLTTINPLISQLENKDDAVKQYVKTALIEQALHLNKNWEITSTKVNKINELATLNHNLKNLYPDSAAVKKLEHEFNQQRANFENEYSDIHRRFLKSRTIFANAKNHNSDENIVKAYSYSNS…
1	1236	GC_00000028	conserved_T6SS	emors_11_1_cat	106272	37.8	38.1															MSIYQHQYILDSDIVVPTGMNTELAIAIARADIDRFATYEDGNEKYTVASLEFVDQTCLMAKVQETLNVLITPLLDRLHISLKPLPLLLSVPQEISEHDLRNWIDESDFSDYLSNIKFSKNSGNAFLQECLNSLAEPDAIMCIAIDSLYDKKEALISSRDAMSGTNPWGVLPSEGGAGMVLTKRNVLDTLKLIPQSKIVYSQFDWHSSDRRGCARLIRAASKHHDNLGPIYSDMTNERAHTEDYGFAIGARSEVIPYAQQVTLTNEFWGTIGGGSGIATLATMNHLSTVGVLSTAFLFDQNNTRSLFILNREK
1	1272	GC_00000029	conserved_T6SS	emors_11_1_cat	106272	37.8	38.1											30	3.08e-17	WP_138184353	serine/threonine protein kinase [Paenibacillus alvei]	MSELQGSTNDFINQLVVKAIEKKKKNEQTLANKLKPRLEHVLFSQFDVLETIESHNQKTTLYRLAKKDEPEKQICCKVLNSEQPEHIQDMFVAEATHLEVAQHPSIIDFIKLGNEFDRPYFMYKWAEGESVAEKLTRHKYKSFRHDHIAWLIYQLAGALEYIHTKGICHLDIKPSNIIICEDDSIKLIDFGAAQYINDSKEYNEASLSYASPKYIESGKAVPQDDVYSMALLACALFNGYSDNNDWKSLLQQRKRPHTIPKTVWNLLRLVVTKPRTHGLTPISFAQALAHIDINVMQGSHNAPLFTQLRNADLVLRKSSKYDVFRLGRFKYLEASLAACLCLITFTVLLKSFAFTIADNNAVSLSDKSSRIKPAQAATFLSQPPWEIENALDNNSSDVV…
1	1308	GC_00000030	conserved_T6SS	emors_11_1_cat	106272	37.8	38.1															MNRYRYLVDDVKKTLTDADKQQAMADIALAQEQLSSFSENMVDFLYTKAILAAETASFYIKQQYRFHQNGYPAKEIDYLTLLDTQLSEIEKVFIALLRIHRGFVYVVYSEYPEVLAWLCLSKNIESQHENDELALLGIGIIDQLDPELAMSLILRSNSNHIHKLLARFIEGGASKRELYYRCLVINQSVSVSLIKHWLEDKKLPEKMLHSYLALMNVGSSIEWLQELTNVDDLLFENLILKEDRATWFRQQYSVDTISSETANTYSKLLTLKEFSLFDIEKEQAVIHFILSGDTELVPLIIEHLMQLDEVDAQLWCEGLFLVYGEEFPFLPSKLGNTIEWQDALHEIVEWQEQIEVVKPVLFRMGQKLTFDASIKAMKSSELSSSLREWLWRELCIMSR…
1	1344	GC_00000031	conserved_T6SS	emors_11_1_cat	106272	37.8	38.1	K19304	murein DDendopeptidase [EC:3.4.24.]									31.154	1.97e-41	WP_116986330	murein DD-endopeptidase MepM, partial [Escherichia coli]	MKLKYLTFISINLAFIILSISLLYFSSNHSDVTNVSQISTSSQKNVSDKEKQKSDNLVINGTINDSFFSSALNAGLTSKQIFSFTEALHNSVNFIDGIEDGTPYSIVLDKDTSHIRSFFYTENNRLHTIQLANNGLYYNELGVNLSSNKLILPTGNLFRISSHFSKKRKHPVIGIVQAHVGTDYATPIGTPVMSVSKGIVSRSEYHPLAGNFITIKHNNGITTRYLHLNDRYVNKGDHVYKGEIIGKTGNSGRTTGPHLHFEYIVNNIPQDFTKLHNDIEMPLNNKNQKKLLKCINLSKTLITKILKEA
1	1376	GC_00000032	other	emors_11_1_cat	106272	37.8	38.1															MSALKNILLLALFSITLMGCNDPENAAAEAAQLKAEQHPERTYVGEHNYYTMESSEHAAFGRKKELKVMYQDFPRYFVEKAKEWPKEDLNDASSYDLPRFQFAWANSSSKDEYENGLKIWSMKTDGTDLRLVTDVTVELVNGIKNLTRSPNNRYVAWADLGGYKTVYDIKTGKVVELSIAMSPLPMLWSEDSRYLYFERARNLYSRWDSMTGEVSKVDLKIRTEAVLTEDKIIKVTDAAVVGYNLKTNERLFVLSSDRSLSDKERIFNVKSISPTGRFAWGSNQDYGWLFDTKKQTVKQMVDDFVPAQILGKDAHFSALDSFAKVRIVDRVGERVWSWRAFYYGALSGDAILYNGLANNGLWFKEGK
1	1377	GC_00000032	other	emors_11_1_cat	106272	37.8	38.1															MKKILLLALLSITLMGCNDPESVAAEAAQLRAEQHPDRTYVGEHNYYTMESSGDIQFTTKKDLKVMYQDFPRYFIEKAKEWPKEDLNDASSYDLPRFQFAWANSSSKDEYESGIKIWSMKTDGTDLRLVTDATIDLTAVRNLTRSPNNRYVAWAGSGGHKSVYDLKTGKVSDMHKFTSPLDMLWSEDSRYLYFDDARNSYARWDSETGEVIDSDLKVRTEAVLTENKIIKVTDAAVVGYNLKTNERLFVLSSDRSLSDKERIFRVKSISPTGRFAWGSNQSFAWMFDTKELTVKQMTTDYTPAQILGKDAHFSALDSFAKVRIVDRVGDRVWSWRAFYYGALSGDAILYNGLANNGLWFKEDK
1	1378	GC_00000032	other	emors_11_1_cat	106272	37.8	38.1															MKKILLLVLFSITLMGCNDPESVAAEAAQLRAEQHPDRTYVGENNYYTMESSGDIQFTTKKDLKVMYQDFPRYFIEKAKEWPKEDLNDASSYDLPRFQFAWANSSSKDEYESGIKIWSMKTDGTDLRLVTDVTVELVNGIKNLTRSPNNRYVAWADLGGYKTVYDIKTGKVVELSISMSPLAMLWSEDSRYLYFERARDLFSRWDSVTGEVSKVDFDIETSAVSYGGNRIVVYPFGVTVFDSITNEKKLLIDVDEKLPFKEARMTVRSIDPTGHYAWGSNPSFGFFFDIKKGTVKQMTTDFTPAQILGKDAYYSALNSFAKVRIVDRVGDRVWSWRAFYYEALSGDAILYNGLANNGLWFKEDK
1	1413	GC_00000033	other	emors_11_1_cat	106272	37.8	38.1							EFF01460	32.821	4.34e-30	NA					MSYPMPHVWLPYKLLGEVQADCYMYYSQASLSDSEISSLEANHVNIAVSIDEMSVYSQQQAFEGEHIYALPLAKSSSFGAHIINEQNDSNIAAIAVMPPKNQITLRYRICRTTDQPDDFMMLRNEDQEWSQKVYFRQAKADDEGFLNLPFSGWPKEVEEVDILRGASADLGTTEYELSVLKTKIKISELIG
1	1446	GC_00000034	other	emors_11_1_cat	106272	37.8	38.1															MSALKTYDHGIYLFGAYFTSYLDEEGERIEATWHQSSDVTEANLRNVRPIPFTPVLIDDAEKPVLWGTNKDGLLCQLGYFDENTASETLAKKQTFLRHKAPLIVIDLIIKNVLIISHLTKIKISELIG
1	1477	GC_00000035	other	emors_11_1_cat	106272	37.8	38.1															MAIQFTSIVESGRFKDRKFARLVLNTILLIIVLMVMTLEILDDYDILDIFNDIQDNIIAFTTLCYMSALYSYGYQLPLFKHQWQVFLILYLTLAQAVYVLGYLTYTQYDQHSIIYLLSYGLFWSLFYGYLIYTINNLKNDIK
1	1710	GC_00000046	other	emors_11_1_cat	106272	37.8	38.1															MNTKRNVALIGALLFTLTTAGCGSDTQTEAERLYQENLDYVVSDLEFDKMDYSTPDWLTLITIPEKPVLDKWDQLYSQPQIMFHYGEDSTIYIMNMNGTDVRLLLHRDELGKLPAPTGFTQRSNTGRYLLLDYYGMAGTRCAVFDLKNREIVSDVKACHGAEFSQDDRYFYYINTGSKFYPHRVDLETKVTTDVLPDEVEVDGEVFYPQGDTGSFTIDETQDRFIWALSRDIARKQPDLPRTVVFRLSDMKLLGRQEYLPENCEGGNTHHMDKRYFVCGRDYATYRMSDPMTLVENAPYDEMIQRGKWYMDSDGRDIYRYKQPGESGMFDKVKYIYKIKPKGSQDFSEYDNPGRFSAYLPPNLANDFDNMDLRVFFPAIPTQAQYQESYQRQLKERKET…
1	1711	GC_00000046	other	emors_11_1_cat	106272	37.8	38.1															MNTKRNVALIGVLLFTLITAGCDSDTQTEAERLYNRNLDFFVKGTEFRGRDINRTFPSLIPLTIPEKPVLDKWDQLYSQPQIMFHYGKDSTIYIMNMNGTDVRLLLHRDELGKLPASTGFTQRSNTGRYLLLDYYGMAGTRCAVFDLENREIVSDVKACHGAEFSQDDRYFYYINTGSKFYPHRVDLETKVTTDVLPDEVVVDGQVFYPQGDTGSFTIDEANDRFIWSLSSDIARKQADLPRTVVFRLSDMKLLGRQEYLPENCESGNTYHMDKRYFVCGRDNETYLVSDXXXXXXXXXXXXXXXXXXXXXXXXXXXXXXXXXXXXXXXXXXIYRLT
1	1712	GC_00000046	other	emors_11_1_cat	106272	37.8	38.1															MKISHNFALIGALLFTLITAGCGSDTQTEAERLYNFNLDIFVKWTEFKGRDKNRIFAPLVPITIPEKLVLDKWDQLYSQPQIMFHYGEDSTIYIMNMNGTDVRLLLHRDELGKLPAPTGFTQRSNTGRYLLLKYYAIAGTNCAVFDLKNREIVSDTDECFGAQFSQDDRYFYYMDYHEFYPHSMDLGTKVTTDVLPNEIEVDGEVFYPERDSGSFFVDTANDRFVWSLSSDIARKQPDLPRTVVFRLSDMKLLGRQEYLPENCEGGNTYHMDKRYFVCGRDYETYLVSDXXXXXXXXXXXXXXXXXXXXXXXXXXXXXXXYLPPNLANDFDNMDLGVFFPAIPTQAQYQESYQRQLKERKETNNGK
1	1748	GC_00000049	other	emors_11_1_cat	106272	37.8	38.1															MNKYNNEYYIVFENYNNETLYLSPLQKTFDRNYTYTKMAMGQDPLFFENAYEREKRYKDFEVRIMQKTFAKK
1	1791	GC_00000053	other	emors_11_1_cat	106272	37.8	38.1							EFF01858	48.855	4.14e-31	Toxin PAAR-like domain					MGVTVAANGLSVVHQGSGGEANATLPDVCLTKVGKPIVPIPYGNNAKSADLAKGTTTITMDGGNPVAIKGSTFSKSTGDAGGDKKGVASGTIEAEAEFISASPTVKFEGKGVCRLSDQMTMNKANTMCLGGAQNPSVSVTEDEEGTYTVYVKSRYPDGIRLKDADFDITDPSGSVLTSGHFDDSGKSTVSGLKPGQIKILAKESTNAFVPKVVRIDNPHYLMTLTDDDFFDRASQGQQTFWHPYRIAPPSEGWGAMGTSLTADRYFLDIVDLEVKTHFLQRHPDFSFSILAEALVAGVESMSEESMDRVLSLSLPLVLEEGELLSVLFRLPKHETADRMLAYMRARGKGNPQTFLQEYDWQSAKQALSRQLEAVLSKVKGRLESLSSEASRLNYLYLSS…
1	1810	GC_00000055	other	emors_11_1_cat	106272	37.8	38.1															MKKKILLGLGLTTVVVAGVGYIATKPYFDEKARIESMADRLDLYKGKTDTWLYQYDFEIPDNPKVADWNTENVTLPQVLFTIENREDKSKVSYWALNIDGTNPQLLIPEGILPPAPNTGIDYAKYMSRSPNGRYLVIPQESSTVLYDLDNGEITNISEVYGATRHDIMWDTDSTQVVVKKRDELLRVKLDTKEVVKFTDVNGSWAEYLTSFAKPYMSQSEQAIYFSYEPGLAGFGCKGRKEEYLETFGESDVPKCGNTFVFDAKTLKLADRGDFTPDSYDCNVWGGKYGDGFYCLGGAAYRSGRPSEKIGDFPATVDLLAFNGGDMWFVPGHGRNITRVLHQPTENSPTTKMIYGFVGFSDGERVEKSAYGFGFSRYVIEHKEADNWSESLYPLPTYTD…
1	1859	GC_00000061	other	emors_11_1_cat	106272	37.8	38.1							EFF01293	50.172	5.36e-97	NA					MVVETYMHFNCKLIPSSSLSHKELEYILTPDEYIRLLSREKNSQNIINQLPVQLRQSLSISASKSVQSLLFSLNQKLTKAEWIAVSTTVRKTGVSDTQLAQYPQLKKQIDRVETTQPAKFVKANFKPVTDDVPLVRNLSFTPVEPSPEHKISIEFAGQWPNNAASLLLAKSGEQKEKITKPRADIHASHRSIATFKDLEPEPRNLYLTIPMNGTPQPLKLLIAENIQPVDKETEMDEWDTVLVPVKALAYLTSEQNKLNAAELQGGYVYLFWKGVLWREFYIDNNGYYQDIDVEYHRRIFDEEKNKSKPKTLKREPDGLPLAQFWVPYKIAGEVQQGENGLKIIFSPKQKRFAQIEALESDAALLEKSSTPLDELSSYSDAQSFSAQEFTSDVDSAVIH…
1	1914	GC_00000068	other	emors_11_1_cat	106272	37.8	38.1	K06894	alpha2macroglobulin									27.203	6.22e-150	WP_119146146	alpha-2-macroglobulin family protein [Pseudomonas reidholzensis]	MKIIVRLLFLLALVHLKAAAAPKSDNTITYLGNYTHNQKPAFIIQFSESAPNSNLINISETKTKKILPNNWILNKSKTALIYTNIEVGKSYTITLSKPLSYKKNTQHDVIVYEKEPSVDIVGRGPIVPIFGKRTLPISTINVEQVSVEVLKVTDPALLLNSTHYSESPGRWELRELTKATSPVTHLSFDIVKTEKNTSQYTELLLPKSLESGWYLLAIKPTGNFDYNSEKVLHVALTDIGIQAKVFPHSLSVQVASLSSADPIQQASVSIYHKNGKQTQLGLIEQHIGTFNYDVKQGDILSVKKGDQISYLPLRELPLDLSDYAVSGREYQDVDVFTYSNRDLFKPGETLPLNLLLRNSDGQLVQDVNRLFIEYIKPDHTIARSRWLQQEDAKGYYQDT…
1	1976	GC_00000078	other	emors_11_1_cat	106272	37.8	38.1											27.917	4.16e-48	WP_133306178	DUF4132 domain-containing protein, partial [Microbispora triticiradicis]	MITESELNIAKKIVEDNDSFYDIKDELREHFEDGDQYKNILWELHKKQILNLATEINSWYTLSGASNGYTIADCIDLFTQASKEPENINRWNQYGKMTDYSVSLIKKAQGDVQPLIDALPSFLESISLSLYFEFLKNKQINVDQTPACLLTKIAEDVVDDREQSTLEEMFACWPHQDVCDAINIAATQARYIYSLDFLAFTSHSITPEQLCIIAENHRVDYDDIAPYFDQHSDVICQIALAYPVPQNYDGHSRAMALFPWLALHLKKQNQQIDDARADYLVEHLSAYDLRTNSAVLSALSDQHMEKFILKHLHKVELLNLFCNENVATRMVQRIVDWGRSELRIDKKEEKGLAVIGTRFPHVLISALQTKKIPQRFFLVNALSVSTDPDAIPTLIDYLD…
1	1981	GC_00000079	other	emors_11_1_cat	106272	37.8	38.1											45.609	3.98e-116	WP_117511077	AAA family ATPase [Fusobacterium varium]	MFAVQRLPAEQLYKEQLTALQDADTSSKPAHWQLSPKAVRTFILGSDTPISGQIITRKIYGNDAVVERAIVTLLGQQGLMLVGEPGTAKSLLSELLSAAICGNSTYTVQGSAGLFEENIRYSWNYATLLKSGPTMDAMVPGPLFNAMKQGAIMRFEELTRCPTEVQDNLIPILSDRILHIPEIQSETNYLLSQPGFTIIASANLNDRGVNQMSSALKRRFNFEVLKPLAQRQQRIELVMTQVNDRLKHEKVDLRLENDTIDVLVTVFDELKSGQVAGVSIPTPSTLLSIPESINLAFHAAMQCHYFGDNHVTPAHLAQFLMGTVIKDNQKDHESLSDYIRVITRQRANDPQWALFLDGCKHAGI
1	1986	GC_00000080	other	emors_11_1_cat	106272	37.8	38.1											37.912	8.28e-78	WP_122147396	VWA domain-containing protein [Parabacteroides gordonii]	MTNEQNRRWRLILGQPYSHTLNQEDALKDQCLDQLYSQEYKDRFTVSSKGGISSGLPSPITWLSSVKKAFPKSTVEILQQHGLARYGLTSLLLDEDTLKQQTADLDLLQLLLSFREQIPASLHSELERIIQTVCKELEEVLTQQIRSVFSHHRVPMSHAQPMPLSYTHWHHTIKRNLKHYQIDTETFILERPFFYQTQQNKVPWDIHLVVDQSGSMLNSLIHAAVVATIFCRLPMLNVKLYLFDTRVVDVTEHTGDPLAILLNSQLGGGTSIGLAMKYTHERITDPARSMVVLISDFYEGGSPASLYHYTEKMHRDGVTLLGLTALDTAGIPQYDNQITNQLLHKGMEIASMTPEHLSQWVAEVIK
1	1996	GC_00000082	other	emors_11_1_cat	106272	37.8	38.1											22.096	1.37e-11	WP_122147395	SWIM zinc finger family protein [Parabacteroides gordonii]	MTLLHWSQQLSDDFLVNWTNRGLLRRATKQSQDVDIREWGITPSHLNGVIDQHQLTLSEKSVDALTCSCGAINTCFHKVAFFIALRQCESQATPETTTEVTSSLAPFSLNEWFIQHCDDLAPIMGKSTVTKAIQHWRKGITLDVETHDEHAIVQCHFASSKSFRLYFPRASQWELATCSCKQHPCVHQAAALIALSIQGNTLAMDEAIFIEKISDKQRAQLRQLEQWLEETLSVGVQNIVPAQLAQAHTLVLELNQVDLPSLSTQLNSVLNTIEYLVANYIDVDYATVIPQITALSLQLHALQQTPLPCPLHLLAGEHKRRYHPVSYHNLMGISVEFWHTDKGAQGYRFYLYDHSQHQWATITDGRKAERNQGWNSQLSFAHTRCDLKALPSLALMSFS…
1	2001	GC_00000083	other	emors_11_1_cat	106272	37.8	38.1											26.264	3.73e-64	WP_122147397	DUF5682 family protein [Parabacteroides gordonii]	MDANMQGSDLLSLAAQFHHDNNLVWAPIRHHSPTCSWYLLQLIKQAKPDVILIETPHDAQSLLPYMQADECQAPVAIYLHKQARLANETKSAPYAQRGFIPFAEMSPEWNALKTAKKKNIPCQFIDLPYGYWNDSNEEENNPLIYASSEKKHFQHRYLDALLQRSGCEHFDQWWDRHFEADVTLSPSEFFIRMHLFGLQMREGRIETDHHTQYREQYMASQIAPYIQEGKRVLVVCGAFHCMGISHYLQQSTSDFLPQIKVETSYQHLIPYPLSRLSHTQYGAHLSQSGYYAHWWKKLKSSTKKERATLATRLHTELATELMSFLQQKEHPVAMPQLVDLVVAAEHLAQLRQVPVGRSEFCEAACLTLEKDPSLSDHISRFSLWLDAFFVDSQYGKVPN…
1	2030	GC_00000089	other	emors_11_1_cat	106272	37.8	38.1															MERDQLSDFLLKWQQLSHAILQQGCNNLRPITKQHLEAWQQQAALLGFHPLNDYCHGLLNPTQAEITPANAFRHLLHYMEGIHRTAIGLYMPNN
1	2034	GC_00000090	other	emors_11_1_cat	106272	37.8	38.1											34.568	4.53e-09	WP_116986361	DUF1190 domain-containing protein, partial [Escherichia coli]	MIVRKGKVEIKKHLKPHSRYLKPLTLTVFTASVTGCSDDNLYFFENVGECKKELNFNEAECISAYQIAEKKAQKSSFEYQTEKECFDDFGFGVCQLNDRKKYQPNNFGWVMSHAKTSQTSQVDYEMFIEPVYLSTNPRSSKFSYLMLTDKNGKNFYIEKYHLVNDAKVKKPRLAVFYKEILEKQNTGGYYSSTAGMITNNDWDDHRNYYSYNYPHNNSMSPPKVIKYKEPKLEDVKLHKTKSNKNFSFNSSKSVRGFGSTSRSKSSWGG
1	2038	GC_00000091	other	emors_11_1_cat	106272	37.8	38.1											27.143	2.72e-06	WP_117458719	PspA/IM30 family protein [Catenibacterium sp. AM22-6LB]	MSVWKKLITAIKGGANDAAEAVVDNQAFRILEQEIREAKDELKRSDEALIGIIAKRKLAEQKVNGFNSGIAEYEEHARNAMEKGQQELALECAQRVASLRNEQGSEQQFLDTFLSSEATMKQKISAAKDRLRQLEQQVDVVKATEAVQKAQITVASTNIGSNNKMHTAMDSLERIKQRQIETAAKLEASQELDEASSSDSLDKKLVEAGISKNCSSAEDELARILGK
1	2042	GC_00000092	other	emors_11_1_cat	106272	37.8	38.1	K08989	putative membrane protein									30.508	0.000615	WP_116970715	DUF350 domain-containing protein [Blastomonas sp. UPD001]	MINEYINTSGFLLFLGYFATSIIFLVCFKFLYLFCTPYDELKLIQEEKNCAASITLSGALIGYAIAIASASSNSVGFVDFIIWGVIAAIAQVFGFWFLKTILLKDLVSRIKDNEIPAAIITAAFSISIGLLNAAGLTY
1	2046	GC_00000093	other	emors_11_1_cat	106272	37.8	38.1											49.737	8.82e-130	WP_117582180	glutathionylspermidine synthase family protein [Enterobacter]	MLLVDNQPRLSWKNRMMEFDFNFYQVDENIPYWCEDRHYRFTLAQIDEIDKATEIVHELCLKAVEYVMDNDLLDLFQIPESAHHFVKSSWNNKEQYLYGRMDFSWNGIHPPKLLEYNADTPTSLFECSVIQWDWLKQHVDRGDLPNNADQFNLVDELLIARFRLIKEDKNLRSNLLHFAACTESEEDLRTIEYLADCAIDAGFDVHIMDIEAIELSYEHTFLDDQGRRIVNMFKLYPWEFMLREEFGAYLEEAGVMWLEPAWKSILSNKALLPILWKLFPDCPYLLPAYFDTDQEARLMESKVKKPIFSREGSNIEIWKNGIQLEKSDGPYGEEGFIVQEYSPLANLGCGSTVIGSWLIGKVAGGMSVRESSTLITEDTALFVPHIIHG
1	2050	GC_00000094	other	emors_11_1_cat	106272	37.8	38.1	K09980	uncharacterized protein									33.043	1.19e-13	WP_117009386	DUF2170 family protein, partial [Escherichia coli]	MTWNITELATTLNKESLWEVKENDNTILITNNDGIEAFLAISGEQILVEILLFSEENVSDIAGLNAFILKTHKLFPLSTIGINQIEQGNYYVAFGALSSHSTEESINIEINTLFNNVEGFLDIYQSYLKESE
1	2054	GC_00000095	other	emors_11_1_cat	106272	37.8	38.1	K05367	penicillinbinding protein 1C [EC:2.4.1.129]									36.711	4.16e-153	WP_117016682	peptidoglycan glycosyltransferase PbpC, partial [Escherichia coli]	MSSIYLRMSAVLQQHSFFRWICRAIITIALLLISAFFIAHSLSPLDLTQRLDSATTIYSKNGDVLRQFANSKGTYRLPIIHTEQEGHIIRPVSSDYLTALLEYEDKYFYYHPGINPFSLIRAVVQHAVYGEVISGGSTLTMQVARMFYPYKRSYGGKIEQIFRALQIEWHFSKEEILDLYLTHTPMGGNIEGVESASRRYFGKSAKDLNTTEAILLVVLPQRPSATRPDRYPDRALAARNKVLMRTQHALKISDQALQDLLNAPLEAKRYYQDTMTPLLARHLASAAPQQRTFHTFIDHTLQYSIDKLIKQTALQWPNRLSSAIMVMDNTTGHVIAYKGSADFSNFERYGHVNMALAIRSPGSTLKPFIYGLALEQNMVHSGSLLMDIPYAYGDYQPQN…
1	2058	GC_00000096	other	emors_11_1_cat	106272	37.8	38.1															MKIASILIKEENKVTLGKNIVEISNVKTINKLIITLSDIITNHEYNKLYELYRTSTIINIEFIDGKNSIELSYKIDDRSKGYLIIKNNNKVVQSDVILFTEFELLLKDISMNRYTALKCFSTKKLIKRCKLLKKIKYFIFMLSFVSIVCFAFTDFLYYSDHFNEFKLLYLSMFFIVFFLLFYVDGNEFKFNIKLYLKNAIFSLFLSLSLVQGLIMPMHFFSGEEGLLEMVIVNKVNDAYIINDCDFGINTREVFSPICIKSKVYWLFSNEKRKINVSGFVSNIAIEIQTIEYK
1	2062	GC_00000097	other	emors_11_1_cat	106272	37.8	38.1	K07126	uncharacterized protein									26.705	4.31e-08	WP_117553854	sel1 repeat family protein [Faecalibacterium prausnitzii]	MKISLNINGKSMLDCKLMTKNVFVLCCTLVVFGCSSYQTDDYELAKQHINNKAYLPAEALLLPLSQTNYLPAINLLGDMYENYQWDSIEKNRYEAVTELWKRSAQLGDITGQYNYAFDLMLRDKLDESIIWFKKAQVQGSIKAEYYLAILLLKKRECEQQGYEYLVNAARNGDSNANHALAMIYLGEKKYQSINVEKNKSKGLTLLINSASNGNILSQYELAKYYEKNRMRNQAIYWYEKVYIKDRTAVKDKLVYLKASDYNNVFFIQDDKLLLLSDKIALTSIKRSDFSIVYYQEKVFTSAMQISLTDDINIFNMIKVGEPVENTSVYSLGSGIAAGIGGYKTAFISSDGHHYVYYDETIYSRAKLVRELNDGALELEFNINKFYLGGGEYPINRLPL…
1	2066	GC_00000098	other	emors_11_1_cat	106272	37.8	38.1											20.89	5.49e-10	WP_117668750	potassium channel family protein [Micromonospora sp. MW-13]	MERVKEILRDLFNKYLMEMTWLTILFLLSSYIAISWVGLTITQEYKLTKSVQQFLYYIITTGSTVGYGDLSPLTDNGKLLTAFFIIPCGISLFALVLGKMAVGFSEFWFIKRKGKHKVKIKGHIIIIGINLERTPYLLSMLKREEKGRREIIVVSKEFTESPFEPDIHFINVNSFTDIEEMNRSNLTEASAVIVDTDSDDSTLTLSLFIAEQNSKAHLVASFNDSVKAELLHKYCPNSECIRSLSTELLAKSVMDKGSSLVHSELVSAHKGHTQYSIKIPESMVDVEFELIYISLKKYYQATAIAIQKQNREMILNPNLSYIVTSGTIIYYIADERINDIDWSLIKR
1	2070	GC_00000099	other	emors_11_1_cat	106272	37.8	38.1											41.935	1.03e-05	RGB23719	hypothetical protein C1646_774107 [Rhizophagus diaphanus]	MYNAFKNIVFFTLAIALSGYLNSESDNEIDAVDETIRLIGIENVTRNITTHEANDVAKKLMLEGLFYDAISVIENIKEKDIISYLILGVIEYIENGNNDKAMSVFNKISGNPISMYFIGNIYKDNDDPNKAIYWIEQSAKYGFLNAQYQLSLLYMEFGFYNKAYIWARCATLNGYHDTHSLVNTFENNIFLIDKKQTIDSIYNTRTCPFNIKYSKEFEKLGYKSIH
1	2074	GC_00000100	other	emors_11_1_cat	106272	37.8	38.1											39.062	0.000327	WP_117053328	DUF2491 family protein, partial [Klebsiella pneumoniae]	MAIDNNGLFNVDKIMFDWFRKKEKNQETIPEVLGLRLGGVIDLDPLKLQLIEDDLTIENAASTQLIQAVGEIQLGDNNRILRFYTDDDGFIQVIQYGTDELGIEEVKLVYYYDTLVINNQKEWENYLKHKLVKEVWNLDSQTFHKAWDNNSPVAMTETIWTIEKSKSQLDQFIMIYEREINDDLFETLFVIAEEKIESNQYHRCISISTAFDLSQTDFKTIG
1	2078	GC_00000101	other	emors_11_1_cat	106272	37.8	38.1															MIFFKRNNKFSFLWVILSFITFVFVELFLGGFVGQVLIGKYISISLKLTIQALLHLSSFFIGGVIIGILSPGIRIWEPAIAAFLSVGIMFSISMFTPYSYISFSQEKMLIGGCIAFFLSRMGARLGERVVGNWP
1	2098	GC_00000109	other	emors_11_1_cat	106272	37.8	38.1															MTIYAKSLLKNRGKPGHGSNTRNSDAWESIKKHNSIFNNPINGNSSANHPWFYKSSSIAAHHIIPIECMQNSIKWERLCKVTGYNINHWRNISILPMCSKLACQLGVQIHIGPHDAGRYGTSNYIQGVKNKIAYILDDLDEGELCDESLSDIVKEIDNISKNILSDIDNFSCTISRLGTDYDKGRLGCRNLSKNESEKFVKDALITTCTHRKKDNLGLGHNLIHLFKNNLIITKKGKLKVGH
1	2102	GC_00000111	other	emors_11_1_cat	106272	37.8	38.1															MTYIQLSKFIINHKNPLIIKNIQMDLILEKSSSVDLLISDELLSLFEHNLSLEIPTKKVLVERQIDEDGDIDFYHMNKLLLRNKKSEKIGFIEKDDIYLHQNLLKTIKKNMHLSIKE
1	2114	GC_00000117	other	emors_11_1_cat	106272	37.8	38.1															MINEEYYVWTEDCQFGLLDATDEYTETIQNKRELVSINSNLKYKITCKGDSDLVPDVYYSPKFLVGKKIQRLLLDLNLDYIQLIPASIENKSEEFYLLKIINFISLIDEKNSKVMIKRGNIKNVDKIKLSNELLNIQLIDRLIFKIGHSPVTLIHKSIVNELLTLNLQGVRFIPVLSWNSWSITK
1	2119	GC_00000120	other	emors_11_1_cat	106272	37.8	38.1															MNHYNEEYYLLFPDPDVDTYDLNSDSMTNKRRYKKIELDYGQMPLKFSTETYDLSFATSNYEIFFPIGSIVVTEGLKSLLENGLYGSKFYPAIVKGESEGIREDVWALNIYKLLDCWDRDKSVASYPGGVKSLDGIDVAPSVKTFHLSSEILDNIPEKERLLFVMDNTDVTNIFVHQKFVDIFRKHNIQGTRFIKVSKYRFGMEFV
1	2161	GC_00000149	other	emors_11_1_cat	106272	37.8	38.1							EFF01800	52.988	1.37e-91	Toxin PAAR-like domain					MATEVKPEIKGNITKEPEPGAPDYRKAWIANVNEYNNGKDGKRGKPHPFCHGIQMDTHHLISGKALADLDESLQEALRLKGYNVNSLGNLVGLPSTFKGACHLGIQVHRTRHSFKKNEFSEVNESDYHEKVREIIERQERAIKSCYGTTEQEESKRDIHKNHMDQISQRLLDRLLNFELLLTRVGSHFDRGKTPYIGCANKDKIGELKTNLECCVTENNDHRREWDKFKNYTPEVEISFAQYWLPERGI
1	2164	GC_00000152	other	emors_11_1_cat	106272	37.8	38.1															MKNYEEQYYLLLKNPFRNDLISLKATLNTSRRDFRIIKLDYGDGPVFFTLSDKSSVFNLNKIQFTGIFPVVSSDVAELLAQYKVRSFQLFPTVIIDHNDNWHEDYFYFNLYDELDCIDFEKSKIRNYDPSDYDHEVIEYKFNNDILDAIDVNERLIILPEGVFGGSLIFHEKIVEKLKKYIDKNSLSFYKLSDYKLGDEYKG
1	2168	GC_00000156	other	emors_11_1_cat	106272	37.8	38.1											36.607	2.8e-06	WP_119139256	OmpA family protein [Pseudomonas reidholzensis]	MAKSNLKVSGVYLLGQLFDDMGPVSNSRYFPLRNVCFAHKDDREVRAVSYDGKGHQTQTPPKAALLYSDALGKITYFNTPESLDLPQALPLQGNAESLDLLQDLPLQGNPASATTFASGNSRLLFFPPYLAPIHLMSEKGKDGKWLANLYDALISEAETKPIENYFQVPEQSNYSISELLPSKEVSDQQYAAAIGKLEDSIEKERLSTLKAIVLPQKYTIVVHFSDANFVGATVTLSNFPSLLRIKGDVEGSNLTAVSKVKPLEFRDIDGKNKKIYSATFWVISDSVFKLEEASQHCRFDIDLSTVNEISAQDFWRDTKIQQYSFCERVLHLPISTPLGRSALVNGDPISVEEALFNQAPHLYPNLLEKLKQSPTDLPEKLASETKNAVAPQIWHSVQS…
1	2171	GC_00000159	other	emors_11_1_cat	106272	37.8	38.1															MNKKVVLGLTALAIAGVGVSSTFSPQVQQWLDERALVQAQQEKYNKALNTVVSSMGLFVDRTSERADWILEVADPRTAPLAQWGSPGDKPQIITQIHLAENREQAGLYTMNLDGSNLQTLLTSEEVGGLVGFTKNLRPQRSPNGRFLFFNMGLFVPLKGCAVADLKTRQIERFGGDCNFGGWLPDSSKAYMSQLGKAYEFDTNSMVMSELPLALPNPDTPELRKKWLEGNWGDLAYDKIKRVRLLNDGKELLVKTRTSRSKKVLGRADKETNLIYQVGDWQHYTVERYYPEECYLAEERRKYNAFSEYIYWREDGGAFTCNTKDGYRSFNTRDMSESTPLVGDSRYALQLGVFSGEESILTRLIRARQAKEMSPIDELTYQYQTLLKGDRVSGFSIYVP…
1	85	GC_00000001	flanking	emors_3_1	81433	37	38.2											47.917	1.61e-27	RGC81918	PTS fructose-like transporter subunit IIB [Hungatella hathewayi]	MKIVAVTACPTGIAHTYMAADVLKKAAAKLGVSIKVETQGAMGVENVLTPVDIVSADLVIIASDIEIEDKNRFLGINSKQFPIETILTDVEGILKKYLF
1	86	GC_00000001	flanking	emors_3_1				K11203	fructoselike PTS system EIIC or EIIBC or EIIABC component									61.746	0	WP_117709256	PTS fructose transporter subunit EIIC [Fusobacterium mortiferum]	MDITSLINANVICLDLTSTSKEDILQEMVQILDDAGKLSNKTQFLSDVWAREEIGNTGFEDGIAIPHAKSSAVLTPSVAIGISRTGIDYGAEDGEPSDIFFMLASTDGDDNQHIEALAQISSRLIEDGFTNKLKKANSKEEILDLFTDIIQPNTESSDIENTQPPTEKSELTRKLGRTKEHLLFGTSHMIPFIVAGGVLLSLSVMISGQGAVPTEGILADIAQMGIAGLTLFTAVLGGYIAYSIADKPGLAPGMIGSWIAVQQYNTGFLGAIIIGFFAGFVVRSLKKIKLPESMASLGSIFIYPLVGTFLTCAAVMWVIGAPISNAMAALNEWLASMAGSGKIALGAILGAMAAFDMGGPINKVATLFAQTQVNTQPWLMGGVGIAICTPPLGMALATF…
1	180	GC_00000002	flanking	emors_3_1				K07001	NTE family protein									31.25	4.71e-101	WP_119143698	patatin-like phospholipase family protein [Pseudomonas reidholzensis]	MRHVFRLNLWFVFLATFLFTPYLYAEPIKEPSRPKIALVLAGGGAKGAAHIGVLKALEELNIPIDIITGTSMGAYVGGLYATGKSASEIEAYLHTVDWYSGYQDEVGREEKNIRDKKYEDRFAINPSLGIRKEGVKSPKSAIQGQNMLKILRETSGNPVFVASFDDFPIRYRSVATDIVSMEEVVIDHGLLVDAMMASMSVPGALPPYEFEDRLLIDGGVTNNMPVELAKEMGADIVIAVDISSNYMTKEQIGSLFDVASQLTNFMVKRSTQEQAEFLTDKDILLQPRVGDIETTDFSSMPRAYQEGYDTVMTLKSRLKSLAVTPNEYAQYRNKIKQQSANVRLAQGTIIDKVEVENRSHYESDKLERFIQFEQGTSLNSDYIEDKIHALYATNRFETI…
1	249	GC_00000003	flanking	emors_3_1														30.097	1.17e-08	WP_116986099	phosphoenolpyruvate--protein phosphotransferase, partial [Escherichia coli]	MELNTIDYRITFFVKDQGLPPQVASQLTRLAKKFKSLVYIDNITQNRSTNAESSLGLLQVGLCPGDFCQLITVGMDAEWANFVLTDLLSSTFDFVASDKLCDFSETITNTYPQLTPQCEVDFHYVKAQAVLSKFEILKGLSQLIYPKESDELLLALIKREERSSTAMAKQIALPHVISPYVEKPTIAIIRSDYPVDWASKMGDVNVIIALVLPEKPTKEMIMAATYLTRSLLSEDFSQRLVHTRQPKGLQALILYAMCQLL
1	317	GC_00000004	flanking	emors_3_1	81433	37	38.2	K01809	mannose6phosphate isomerase [EC:5.3.1.8]	M00114	Pathway modules; Carbohydrate metabolism; Other carbohydrate metabolism	M00114	Ascorbate biosynthesis, plants, fructose6P > ascorbate					62.148	4e-174	WP_005478337	mannose-6-phosphate isomerase, class I [Vibrio parahaemolyticus]	MNALKPQTFYPMTNVIQDYAWGSHTSIEALFDIKNNTGKPQAELWMGAHPNGCSAVTVNGDSILLSDLINQDKEAFLSKTTADAFGELPYLFKVLAAEKALSIQVHPNKQQAVDGFEKEEKTGIALTAFNRNYKDNNHKPELVYALTDYKAMNGFRDYQEIVSLFSAMQLPTIASYVDDLAQEPNSNGLQRFFKAILSLENETKERAVAELLDYASSSTDELFVLLQDLAIQYPNDVGLFAPLMLNVITLKPGEAMFLNACTPHAYIHGTGLEIMANSDNVLRAGLTPKYMDIDELMSCTEFVSQPLSSLLTQPNTVDGGMSYPIPVNDFKFSVFTATDALTLETNSAEILFAIDSDLTLTHENGDSVTVAKGHSVFVPAYAKRYSLTSSGNVARAYN
1	383	GC_00000005	conserved_T6SS	emors_3_1	81433	37	38.2											50	4.71e-11	P96156	Chitodextrinase; AltName: Full=Endo-chitodextinase; Flags: Precursor	MIKLNKITAAITSVMFSGYLYAADASAASNLITFVPGETKVQNGDMVSFNGDCFVAKNNPGVWESPTADSWFWDVAECSGEPNPGPGPNPGPNPTPDPDLGDIIPFIPGKTQVENGDVVSYENQCFIAQNNPGVWETPSASSWFWTLTECSDEPVNPEPEVTELSILAPIAGQVLTANEAISINAHVDGNLAAKVEFWANNTKLAEKTVNQNNTQYSQTWTPSEEGNATINVFVFDKNNQKIEQKSVSVTVKAEVTEDFVAPVVKFVTPANGSTINVTESLSISVNATDADNDLATLVVKANNKEICSFDAANTDTFSCDWQPTQAGNVTLNAIATDVQDLSSTATVKITVEEDVVEPPVEPPVTPGDLCKDFNVYPDWTRGDHATGGDIMVHDNIAYS…
1	433	GC_00000006	conserved_T6SS	emors_3_1	81433	37	38.2	K11892	type VI secretion system protein ImpK									24.8	1.8e-08	WP_010910863	type VI secretion system protein TssL, long form [Mesorhizobium japonicum]	MSYVEDDVTVVLFQPEPGKPMEVMPAPDLSRNISVSELDISSMGINPLVDQFSWLIASLSCMSSIPWLDDPMPFREQVAREIRKGERMLNEMEVDRASILVIRYCLCAAMDESVCRQEWGANSNWSQNSLLSEFHNETSGGDKFFVILDRLKADPRKYRHVIEFLYLLLQLGFKGKYGRAERGAESLTEIGNTIYRLVRDERLAEQEKVALVDVKSKYLKKPLKRVLPPKLILGVSALLFAAMYAATYLVIDVRFQKLLSLYQ
1	472	GC_00000007	conserved_T6SS	emors_3_1	81433	37	38.2											41.849	2.55e-99	WP_011105819	hypothetical protein [Vibrio parahaemolyticus]	MTIFIVIFTIYMVYVSRCHLFTNKYNACSLITTTRFYIFMRIFSFLKLFAGLGLILLISSCGGESKDTSPPKRETTSVSGILFDAPIAGARVVLWEYANGAIGKKLGETRTSSKGDYSMEVNSGSMPVLLQAFGGAYTDPATGEVVYEGDGKTLKFESTAYFYENKANRIMLTPLSLISKGLADYKIHKLGMDAKGAIDSANSTISNMYGFDVITVEPIDIVKGGQSAYVTAGHQYGAYLTAYSVFSSDLIKKYPASDSSSIYTSFTLSDIMYRDISADGQLDGYETDNISGLDKKISFGKESVSVETYTNILSQYILITVNNNRLNVSGTNPNDYKPFASKVNKLGTTPETMTVFPPRTEVPIDDTEPTVERSDKDVLVRLDSLDLLVKDNVGTKSLR…
1	511	GC_00000008	conserved_T6SS	emors_3_1	81433	37	38.2	K11906	type VI secretion system protein VasD									26.984	5.13e-15	WP_010910850	type VI secretion system lipoprotein TssJ [Mesorhizobium]	MQKLLTFSLIFLLSGCTMWDQFKESTGITPETSSIELIITADKVLNVREGGQSSPVILRIHELNSPVLFRNLDFFALFENDKDALGDEYIKRYEYQIQPGDVVHETLVLDPATRAIGFSVAFRDINGSSWRKVELIEEKSEYFLKLNLKESELSSNNTRGIEQIYF
1	549	GC_00000009	conserved_T6SS	emors_3_1	81433	37	38.2	K11893	type VI secretion system protein ImpJ									33.333	2.23e-84	WP_005463797	type VI secretion system baseplate subunit TssK [Vibrio parahaemolyticus]	MSLYNPVVWQDGMFMKPQHFQQLDRFQGKQSGMLSGFESPLHWGIKRIEINTELLALGKIGITHAEGILQDRTPFDLPLHASLPEVKDVDASVANKVLYLCCPLPSERSELFGTSKDGARYSIHTQDAVDACYDSEEIANITIGKLNFCLMYEDEDKSAYTSIPILKISEVKPDGSIILDNAYIPTCIDINASTVLKKFTTEFASMLRHRAESIVQRLGVVDQQGVSSVSDFMLLQALNRYEPLFWHFANIEGVHPEAFYRVLLQAEGELATLCSSSRRPQEFVAYNHGNLTSCLSTILHNSKVTLSVMSEQRAIPLPLKEQGYGIRIAPISDRSIVESTTFILAVKADVTLDILHTQFVSQTKIGSIDNIRELINLQLPGINIKPMPVVPRALPYHAG…
1	587	GC_00000010	conserved_T6SS	emors_3_1	81433	37	38.2											66.5	6.66e-98	WP_011105828	hypothetical protein [Vibrio parahaemolyticus]	MAKPIQLGFMALIMACSLPAFAKGERYGIAANFKTIESTEYEQGMSGELSTISYGLVHTRPIDENNNRWRWLFGFNYLSDYIEAPANGVYQEVTNYEFRIVPQYALGNWWAFTPYVGAGLSLGYSQYGNRWKVDDEGYKYGNQLEDIDQFEVGAVLSFGTVIKLGSNPDAHLQIIPQASYIQPIYNDGLGGLELSVSLLF
1	625	GC_00000011	conserved_T6SS	emors_3_1	81433	37	38.2											39.13	0.000438	WP_117539334	FHA domain-containing protein [Coprococcus catus]	MHLNQLTLFITKSPEEYTGSKHIEMPESGGSLGRNPSNTVSLVDHNRFISGSHCLISIYGDTYYLSDVSTNGTLVNGNKLLKNQPISLYDGDTIVLGRYEISVGLEKLSNSVNIAADISEETDSTDPLVNLAEYTPDEEKDKGNIADLFKETRIDKVDSSDPVAHLNFITQTNNDDHLLHGNEKKQEQKIKEPIHTRQLLDDSDSVHSEFDVPNLIPEDWFSNDFTDTSIPPVQVNEPIATHSEPESMMHSFTDSTPETIISSASEISSVTEQLAWEDVTQTIQPSVSTTEPKSDEFFIAPSTSMDVYPSQSIETSFNSKMSDDAASAFYKGLGMSASQIEQTDEQFFQQMGNCLRLCINNLQKELSELKAIKNNEQDDSMTNIVELMLSLNHQQLLSP…
1	662	GC_00000012	conserved_T6SS	emors_3_1	81433	37	38.2											30.882	1.68e-20	WP_116949140	Lrp/AsnC family transcriptional regulator [Jiangella endophytica]	MSNMNLQGLDKLDRRIISNLLSNGRESIANLSRNVGLSRTAVAERINRLEKTGIIKGYTAQIRMGNKDENASSYLLISCNKGQKDSVSDGLKEIPEVKMTSIVGGTYDIICLIEAPDLHRIHYLCSEIESLSGIKEVKNTIVLHQPVCR
1	698	GC_00000013	conserved_T6SS	emors_3_1	81433	37	38.2	K11901	type VI secretion system protein ImpB									40	2.67e-32	WP_117580760	type VI secretion system contractile sheath small subunit [Enterobacter]	MSRDGSVAPKERINIRYVPATGDVQEDVELPLSMMVVGDFTARTDETPIEDRTPINIDKDNFNDVMEGYSPNVKVNVDNKLSDEEGAQLGVDLTFNSMKDFSPEAIAKSVPELNGLLELREALVALKGPLGNVPAFRKKIAAVLQDEEARQKLLEELNIGSAKEEAKAE
1	734	GC_00000014	conserved_T6SS	emors_3_1	81433	37	38.2	K11905	type VI secretion system protein													MEKGYRLLERIELGEPKNCYEKVVSHKHLIESIHLHLADLLNTHAGNAMIDNDYGLPDFNDVLSNNTNLVRNIQQNIKASIEKFEPRMRNVEVHYRHDNNNPLQLGFGIGGEVIHNGGKVPMAINIFMGVDGQFNV
1	770	GC_00000015	conserved_T6SS	emors_3_1	81433	37	38.2	K11900	type VI secretion system protein ImpC									60.288	0	WP_117611541	type VI secretion system contractile sheath large subunit [Escherichia coli]	MTAEAQAPEQEAALVESGSLLDSILNETRLKPSDEGFDVAKRGVEAFIGELLSTNTSDKVDQSLVDLMISEIDQKLSKQVDAILHNEEVQAIESTWRGLKYLVDHTDFRENIQIELISAKKDEVLDDFEDAPEVVKSGLYKQIYTREYGQFGGKPVGAVICDFQMSASSPDIKLMEYMANVGAMSHAPFITSASAKFFGLDSYEELPNLKDLKSVFEGPQYTKWRGFREHEDARYVGLCTSRMMLRTPYSVEDNPIKAFDYNEHVKDGHDNYLWGNSAYAMASKISESFAKYRWCPNIIGPQSGGTVSDLPVYNYESMGQIETKIPTEILISDRREYELAEEGFIALTMRKGSDNAAFFSANSVQKAKVFPNTPEGQQAEMNYKLGIQLPYMFIINRLA…
1	806	GC_00000016	conserved_T6SS	emors_3_1	81433	37	38.2	K11903	type VI secretion system secreted protein Hcp									52.326	6.63e-65	WP_137712216	Hcp family type VI secretion system effector [Brenneria rubrifaciens]	MPTPAYMSIKGETQGDITKDAYSADSVGNVWQEAHVDEFLVQELDHVLTVPRDPQSGQPTGQRVHRPVVVTKQQDRCSPLLFNSLVSGEKLPECNIKFYRTSTSGKQEHYYTIKLIDALLVDMQTRMAHCQDAAMSDRVTEEVLKFTYRAIEVTHETCGTAGNDDWRTPREA
1	842	GC_00000017	conserved_T6SS	emors_3_1	81433	37	38.2											45.455	5.7e-08	WP_117031792	DUF2169 domain-containing protein, partial [Klebsiella pneumoniae]	MQLWDIDSESPFTLKGRFQRDSEGHEVWVLSMKRAWTFLDGSWSEEVDNLELNDDPIYLGEPGFSAMVADHDFPIYKKNTDVLIYGKARSYAKKPVHSQLCRVLIDEHIDKTLKVVGERHWVDHSGSITVSTTQSFIERDIDYSNAIGGDERNRIGGGAAETNVELLKAKVPSIFYPDQNWQASSKKVKVAGFGPMPPFFHDRAKWAGTFDEKWFEERRPVWPIDFDDRFYQSAPQDQQCNGYLQGGERLMVSGFCHNDALSFRIPSEKFQAVAVFNGKEEKINMPMYTLWIDTENKRIEATYTAAFPCQNREHLLTSSYLVELP
1	878	GC_00000018	conserved_T6SS	emors_3_1	81433	37	38.2	K11895	type VI secretion system protein ImpH									32.344	1.67e-54	WP_000348794	type VI secretion system baseplate subunit TssG [Escherichia coli]	MIQYIINKPCDYSFFQAVSLLEKHYQNLSGIEYKAIGENQYVKNEYIQFSVSPKLSFPKSDIEFITEFERNDASYTQIEVNFMGLHGVSSPLPASYTEKLAGRDPDDNPVKEFFDFFHHRYISMLYRVWKKYRYHIQYKSDAKDPFSGRLLHLVGLSSVIQESSEVDLDRAKLLSYVNQLSTRTRSPKLVSGIVSHYFTLSNVYIEEWVYRRITIAASQRNCLNRKNCQLGGDFHLGQSMADLTGKFNLCIDDIDFDTYVKFLPGGALHETLIGLMKFILCDPMAWDLKLTVRNKSLPINQLGDGLGNELGQTFWLGAAKGEETKIKIVGSN
1	914	GC_00000019	conserved_T6SS	emors_3_1	81433	37	38.2	K11914	sigma54 dependent transcriptional regulator									41.463	2.36e-77	WP_126397535	sigma 54-interacting transcriptional regulator [Blastochloris tepida]	MSLAKSDSLNNALLAISQSLADRSQLALTLDAILAAARQLTFADHGIIYVLDQTGQALLPSVVHHNEHILAEHPWQPLTLESIDETDPFSFAIQNGEVVLINDLYQYNGYQCDEIYQNESILNRKSKNLLAWPLIDNEKNTVGLLVLFDLNVINDEASLTCFCQMAATNIRQAVWLEKYGYMIKELSEDNASLTRENNQLKQRKQSQYSGPIAESEVMLNALARLDKVLSLPVDVLIRGETGVGKEVIAKYIHENSNRSKQALIVQNCAAIPEQLLESELFGHKKGAFTGADKDKIGLFEAADGGTLFLDEIGDMPLLLQAKLLRVLQERKFRPIGGNKEISVDVRVLAATHANLMEKIKKNEFRADLFYRLNVFPITIPPLRERTEDIIPLSEHFIKL…
1	950	GC_00000020	conserved_T6SS	emors_3_1	81433	37	38.2															MKPYLLLLPAALVVAGCSNQTSVPDPLAPYKNVHIIGNKKQSIGSFNYLSKDVDGYTDKQVIVYFNEIPFTSTFNLCADKGVYIANCKSTVSIFPSKNKGVIFNYDLNFYNGSYPARVGSMNILLPSTTTRKMDNLTQYTSAKFSEEQFLESETLEEATFILMKSS
1	986	GC_00000021	conserved_T6SS	emors_3_1	81433	37	38.2	K11891	type VI secretion system protein ImpL									22.863	2.4e-67	AFJ27267	IcmF-like protein [Escherichia coli Xuzhou21]	MIKNTLARTPFILSTVISAFFALLLVGVYYLWFNQADLRLLWGMLGIIFSIFTIFNLTLYIKKRKNKSHQNIETEEDTLSMVLKPLLHKAGKKPVYLVLGNKGSGKNQFLNVSNAIKPMDKVKNVKNDFFEWSESDSAVYIKPNHRLTFQEISSNDSLLWDALINEVIKHKPRKPFAGCMLLIDFEFLIVHDDEQTDYTLNALLQRLESIKETTGATLPLYLIMTKLDKLEGFKEYIHFSPLKSSVEFLAIPLKDAKGAILDYFRDSYKNIVKVMESNALDSSSYTNNPDEKQTILAFPKQFELCEKEISRIIERLNELNQGTYSIDIREVFFSSSLQGGRKYNLLAKSCSNYFNLPIIASEHGQLTETPYFTRFLVDAKVLPESDYSAENQHYLKRIQ…
1	1022	GC_00000022	conserved_T6SS	emors_3_1	81433	37	38.2	K11896	type VI secretion system protein ImpG									32.241	4.4e-90	WP_117681754	type VI secretion system baseplate subunit TssF [Klebsiella pneumoniae]	MSNSKYFQDELTYLKEAGSEFAKYHPKLTHFLSEGTFDPDVERLLEGFAFLTGRVREKIDDELPELTQSLISLLWPHYMRSVPSMCISELVPHSGSVTEKIIVERGAEMASEQVEGTQCQFRTCYDVALYPLSIQQIEQNNSRTNSSLHLTIAANNGLELSRIKLDILRFHLHGEQHITRSLYLWLFRYLEYVELDVGGGYKHRLRADQVVPVGFGDDEGILPYSKNSFSGYRLLQEYFSLPDKFMFFDLKGLEWLGGIPQRSTVKISFAFSRALPSEVIVKNKHFKLHCTPSVNLFEKDGDPIRLDHQLNEYKVRPQSSNQEHYEVYSVESVESWSKAERCRKKLIEFESFEHQINQRDKRDFYKTKVSERINGRGLERYISFHSHNNQVSELGSETV…
1	1058	GC_00000023	conserved_T6SS	emors_3_1	81433	37	38.2	K11910	type VI secretion system protein VasJ									24.063	2.02e-25	WP_119144555	type VI secretion system protein TssA [Pseudomonas reidholzensis]	MASLNFESLLKPISEVAPTGEESKYEFCYELMELEIKKFGSLFGETVDWKVVETNAIEVLTTYSKDLKAICYLIRALIERNGFIGLDEGLNLLKQSLVLFGTDLFPQRKRARDGAMEWFVAQLETTLPKLDTSTTNWESVASYLQRINEISDQYHEAFSDSDVEFYLITSVLNGISQRVVGVSETNTNTSVKMTSEPEPLVEETTSAVTEVKTLSQVATKVPKTVNTVKQEVDIDTDFSSPSASKRTLKKVAEFMLHSDISTPLAYRLHRNCTWCEVDELPPHDNDKKTPLSLAVSQDQLSEYRDKAKQETESEVIKRLERTLTDAPFWLTGHYLMFQMLTNLDHHEAAEAVKQETQYFISQLEGIELLTFANSTPFADEETLKWLSSNTTTTPVAVAA…
1	1094	GC_00000024	conserved_T6SS	emors_3_1	81433	37	38.2	K11907	type VI secretion system protein VasG									45.614	0	WP_117580830	type VI secretion system ATPase TssH [Enterobacter]	MININLSSLIQRLHPITKVALEDAAALAVSERASEVQIEHFLLSLLERPNSDFDQLLAHFECSENLLRQAIKSTLENSHKSNGGKPVFSAMLIEWLQEAWLVSSLDLSETQIRSGALLLTLISNPLRYGQHGYSSLLENINPETLKRNFAELTSRSIESQVATSEQTHAREDGSALSKFTTDFTGKARKGEIDPVFCRDQEIRQIIDILARRRKNNPIAVGEPGVGKTAVVEGLALKIVQGEVPDCLKGVELYGLDMGLLQAGASVKGEFEKRLNAVLDEVKNSPTPIILFIDEAHTLVGGGNQAGGSDAANLLKPALARGEVKTIAATTWSEYKKYFEKDPALARRFQLVKLDEPSTEQAALIIRGLRTVYEKSHNVYVRDDAITAAATLSDRYISGR…
1	1130	GC_00000025	conserved_T6SS	emors_3_1	81433	37	38.2	K11904	type VI secretion system secreted protein VgrG									37.455	1.45e-117	WP_002213876	type VI secretion system tip protein VgrG [Yersinia pestis]	MVSDIEFKFEVLGTEHEFRVESFNVVEELSKPFHVSLSLLSLDADITFDELIRKPALLSIFGQGVATARQFHGVVNEVRYLGEGRRFSRYQITLVPQLWFLTQRQDCRIFQEKSVVDIVTEVLDGAAVTDYRFDISALYPTKEYVLQYRESDSHFVQRLLAEHGLWYYFEHTTANHTMVIVDKNDAIAELENTPLNSSYVGPVIYQADGGGNADREHIFDLESINRVRTGHVTHTDYNYEQPRIPQKMESSGLIDTDLAFFDYPGRYIEPSQGLVRADELMAESVVDNYQIEAASNVMRLIPGYSFILDKHPRRALNRDYTILTVTHSGYDPQVHEDEANEMPTTYQNQFSCLPSDIEFKAPKIAAPVVDGPQTAVVVGPAGEEIYTDKLGRIKVQFHW…
1	1166	GC_00000026	conserved_T6SS	emors_3_1	81433	37	38.2															MVRLQLTNSIEVAGAIDENSQAESLACVPRFGKVISLHPTMPDRIYVEFDGLATGSTALAKIGRLFRKSELEFAIESGLTCRIEFLNGDITLPVLTDIFFSLLDDDQPVILRAKSLIIEAENELIVRSGATQTKYSGRDGRVTTQAKYITSQAEKAQKIQGSTIAVN
1	1202	GC_00000027	conserved_T6SS	emors_3_1	81433	37	38.2	K11911	type VI secretion system protein VasL									45.287	3.99e-124	WP_011105827	type VI secretion system ImpA family N-terminal domain-containing protein [Vibrio parahaemolyticus]	MLGLKFNMNLSDFARRPISIEMPSGINPNSLDDFSEIKREVNKLNTVTSKISWKHVFKLSKSILETESKDIRCACYYTVSATHIDGLKGLVNGLNALLDICVIYWHSGYPDVNKTTARMGAFEWLTEHTIKKQKTLKISPTDLVLIETGHKLTLKIEEELRSHYGNKSPSLGAIRRIFSQWIEEIQTTKLSLEEQRLKKEAIEKQNNSGINVNVSLPPRDESKKTAQPTMTHTEKDKNIKPMVTISLAFIFILTLLFGHFLYADNQKSTLLINIQKADLTTINPLISQLENKEDDLKQYVKTALIKQALHLNKDWEVTSTKVDKINELETLNHSLKNLYSDSAAVKKLEYEFNQQRADFENEYSDIHRRFLKSRTIFANAKNHNSDENIVKAYSYSNSL…
1	1238	GC_00000028	conserved_T6SS	emors_3_1	81433	37	38.2															MSIYQHQYILDSDIVVPTGMNTELAIAIARADIDRFATFEDSNEKYTVASLEFVDQTCLMTKVQETLNVLITPLLDRLHISLKPLPLLLSVPQEISEHDLRNWIDESDFSDYLSNIKFSKNSGNAFLQECLNSLAEPDAIMCIAIDSLYEKKEALMSSRDAMSGTNPWGVLPSEGGAGMVLTKRNVLDTLKLIPQSKIVYSQFDWHSSDRRGCARLIRAASKHHDNLGPIYSDMTNQRAHTEDYGFAIGARSEVLPYAQQVTLTNEFWGTIGGGSGIATLATMNHLSTVGVLSTAFLFDQNNTRSLFILNREK
1	1274	GC_00000029	conserved_T6SS	emors_3_1	81433	37	38.2											30.526	1.93e-17	WP_138184353	serine/threonine protein kinase [Paenibacillus alvei]	MSELQGSTNDFINQLVVKAIEKKKKNEQTLANKLKPRLEHVLFSQFDVLETIESHNQKTTLYRLAKKDEPEKQICCKVLNSEQPEHVQEMFVAEATHLEVAQHPSIIDFIKLGNEFERPYFMYKWAEGESVAEKLTRHKYKSFRHDHIAWLIYQLAGALEYIHTKGICHLDIKPSNIIICEDDSIKLIDFGAAQYINDSRKYNEASLSYASPKYIESGKAVPQDDVYSMALLVCALFTGYSDNNDWKALLQQRKRPHTIPKTVWNLLRLVVTKPRTHGLTPISFAQALAHIDMNVMQGSHNAPLFTQLRNADLVLRKSSKYDVFRLGRFKYLEASLAACLCLITFTVLLKSFAFTVADNNAVSLSDTSSRIKPAQAATFLSQPPWEIENALDNNSSDVV…
1	1310	GC_00000030	conserved_T6SS	emors_3_1	81433	37	38.2															MNRYRYLVDDVKKTLTDADKQQAIADIALAQEQLSSFSENMVNFLYTKAILAAETASFYIKQQYRFHQNGYPAKEIDYLTLLETQLSEIEKVFIALLRIHRGFVYVVYSEYPEVLAWLCLSKNIESQHDNDELTLLGISIIDQLDPELAMPLILRSNSNHIHKLLARFIEGGASKRELYYRCLVINQSVSVSLIKHWLEDKKLPEKMLHSYLALMNVGSSIEWLQELTNVDDLLFENLILKEDRATWFRQQYSVDTISSETANTYSKLLTLKEFSLFDIEKEQAVIHFILSGDTELVPLIIEHLMQLDEVDAQLWCEGLFLVYGEEFPFLPSKLGNTIEWQDALHEIVEWQEQIEVVKSVPLRMGQKLTFDSSIRAMKSAELSSSLREWLWRELCIMSR…
1	1346	GC_00000031	conserved_T6SS	emors_3_1	81433	37	38.2	K19304	murein DDendopeptidase [EC:3.4.24.]									34.529	7.69e-41	WP_116986330	murein DD-endopeptidase MepM, partial [Escherichia coli]	MKLKYLTFISINLAFIILSISLLYFSSNHSSVINGSQLSTSPQKNVFDEKKQKPDNLVINGTINDSFFSSALNAGLTSKQIFSFTEALHNSVNFIDGIEDGTPYSIVLDKDTSHIRSFFYTENNRLHTIQLANNGSYYNELGVNLSSNKLILPTGNLFRISSHFSKERKHPIVGIVQAHVGTDYATPIGTPVMSVSKGIVSRSEYHPLAGNFISIKHNNGITTRYLHLNDRYVNKGDHVYKGEIIGKTGNSGRTTGPHLHFEYIVNNIPQDFTKLHNDIEMPLNNKNQKKLLKCINLSKTLITKILKEA
1	1380	GC_00000032	other	emors_3_1	81433	37	38.2															MKKILLLALFSITLMGCNDPESAAAEAAQLRAEQHPDRTYVGENNYYTMESSGDIQFTTKKDLKIMYQDFPRYFIEKAKEWPKEDLNDASSYDLPRFQFAWANSSSKDEYESGIKIWSMKTDGTDLRLVTDVTVELVNGIKNLTRSPNNRYAAWADLGGYKTVYDIKTGKVVELSISMSPLAMLWSEDSRYLYFERARDLFSRWDSVTGEVSKVDFDVRTTAVNFGGKRTTVLDFGVLVEDANTNEEINWIGVDRSLSMDERSLDVTSIDPEGRYAWGSNPSFGFFFDIEKGTVKQMTTDYTPAQILGKNAHFSALDSFAKVRIVDRVGDRVWSWRAFYYGALSGDAILYNGLANNGLWFKGSK
1	1415	GC_00000033	other	emors_3_1	81433	37	38.2							EFF01293	41.248	2.22e-151	NA					MHFNCKLILSSSLSHKELEYILTPDEYIRLLSREKNSQSIINQLPVQLRQPLSISASKSVQSLLFSLNQKLTKAEWIAVSTTVRKTGLSDTQLAQYPQLKKQIDRVETTQPAKFVKANFKPVTDDVPLVRNLSFTPVNPSPEHKISIEFAGQWPNNAASLLLAKSGEQKEKIAKPRADIHASHRSIATFKDLEPEPRNLYLTIPMNGTPQPLKLLLAENIQPVEKEIEMDEWDTVLVPVVPMKKLGEEYSLHQIGYFYVIWNGKVWREITIDSNGYFCDLDIQHERQEPLPTRHVNINASEFFPEANMSFEKFELYQEGQKVFSGELDVCEQSRVFNLVAEEVELKFVDFEHDEILLTTFESPIKNNASNERQAMSYPMPHVWLPYKLLGEVQADCYVY…
1	1448	GC_00000034	other	emors_3_1	81433	37	38.2															MSALKTYDHGVYLLGAYFDLHDNGRTKEFRTWHQSSDLTKEADLRNVRPIPFTPVLVDDAVKPVLWGSNKDGLLCQLGYFDENTVPETVAKKQTFLRHKAPLTVNELSESQSYSLTFPPLNVIGQLAEKHTSVKALNDSLKDIYSKKLLPEKPDLTQFTISKIKVSQLAEPYKNESDKPLTDEQNDYNDWYDKIIASEVTEIQGIITPVYHSLGVVFSSDLYVGAEVSLIQVKLKQDSSGEVEKVLATSFVTKEAPKKTQTQEEQEDLKKILPSAVFNFDPKLIDDGYFLLRTRFWVEEYLQKQQEFLGEEVKAKFPDSVKQGQLKFETHIEHEESRTVQDVYTYELHEKVTFKPVSGFGKLSMVCGDLISLEECLIYQYPTALPSYSDFMIQQGNPVA…
1	1479	GC_00000035	other	emors_3_1	81433	37	38.2															MFFHQPTLTSLSLPPLQHKKTITLVILTIISVRLKITNRIESAHNKFYKNSMAIQFTSIVESGRFKDRKFARLVLNTIILIIVLMVMTLEILDDYDILDIFNDIQDNIIAFTTLCYMSALYSYGYQLPLFKHQWQVFLILYLTLAQAVYVLGYLTYTQYDQHSIIYLLSYGLFWSLFYGYLIYTINNLKNDIK
1	1509	GC_00000036	other	emors_3_1	81433	37	38.2															MNNEYHILSKSVFSQFLFQQTPKPIVPVEPDLLLEMTFSPKLFIINDIAEKVENLVQHGVEWLDARVDCSPSQPTDEQIKVFENFRMPYIHQTYRLTNEEKQYGKLNWLDLNSVNLDFSRLNNIPLEERLIFKLEEDFGYVFLHESVIELLKKHVKDVWVRDV
1	1535	GC_00000037	other	emors_3_1	81433	37	38.2															MCKQTNYSKYQKRVIKFLNDLLGADTPFTYERANNNHLKVLIDGVTKPLFTGSTPSDCKSINNFMAEVKRELKASKKEESKLSQPEKTGVVSAVTLSNDKLIQNCVKSLRTRITVLKEQEKESVLNNKCINGLNLKRIEIVKHSVSLALQARKQGTYLKPKELRTIEGMVHNHLNFMLPSMAYYAELLNSTSKDKLAKVQPNKQQASVHNESNKNNVISLEDKTQHAPTKEAKKLAKKPKQPVSNKNMNTKNSNSATELMAMSANNRVSLLRNLTKAQALMLIDDINQAMAANREEDIEAVIALIRDKDLPLDAIISRMEAA
1	1561	GC_00000038	other	emors_3_1	81433	37	38.2	K19135	CRISPRassociated protein Csx14									30.363	4.06e-21	WP_116935424	CRISPR-associated ring nuclease Csm6 [Verrucomicrobia bacterium]	MKNILIAVTGASPQVLTETIYALHTQGKPIPEAVYVITTENSKQTLKEGLFIQGYWDKLMTDYQLPPIAFNSDHIWVITDDNGNALVDAKGVDDQSIMADFITRKVALLTQDNEVAIHASIAGGRKTMAFYMGYAMSLYGREQDVLSHVFVDDEFEFVSDFYYPTPVDCFIQGKQGEAINAKEATVTLAEIPFVRMRRQVDECIINQMETHSFSKTVSALNSANNTQVRVSISTKEKTVEVAGVKIPLTSKHLAIYLFFLSKDNRKATLDRYFEDDKTQTTDYLCVLDKMKADVRLYKTMGLEDEGQWRQKDHAELATLTKDFVRQSLNGLHKSLKDKLVPDLFEKIKVHSDGVKSGATYLISPEVLFICDGIEL
1	1587	GC_00000039	other	emors_3_1	81433	37	38.2							EFF01536	48.338	1.79e-107	Toxin PAAR-like domain	45.361	1.19e-18	WP_119719572	hypothetical protein [Klebsiella pneumoniae]	MGVTVAANGLSVVHQGSGGEANATLPDVCLTKVGKPIVPIPYGNNAKSADLAKGTTTITMDGGNPVAIKGSTFSKSTGDAGGDKKGVASGTIEAEAEFISASPTVKFEGKGVCRLSDQMTMNKANTMCLGGAQNPSVSLTLEEEGTYTVDLFLSYSDGDPVQGATYKLVDQTGTIFEGNLDTKGKASISGIAPGEFDIEYGEDSREFTPNIPTKENPNYNPNASAQMLIDETKRGEIGFWESSWRKTAGAASWIWGVILGDFNDDATVEQIIANTAITMLPVVDQAADVRDMVANTMTLLNEEERDKPENWLALSLTLIGCIPVFGSAVKGTCKVALKSGKATSKDDLLAIMRAMGKGDPEKFLRTLDWADYAKQTSQIISDVLQPCIEVATELASYAN…
1	1613	GC_00000040	other	emors_3_1	81433	37	38.2															MNYSVITENYFSAKTSFSCIDSREMLYSKNNYEPTSSINPIIWEDSNGLIKDITHIIDNGDLCVSEEFAQLIMSFDPYGIETYPAKLILSDGTIQKRYILALNNIIDVMDREKSITEISPKRNKILVQALYLSEEKLLTYPLEKRILFRVKGAEIATFYSEDIYDLINNNERFNELRKIILNTSQEAPTF
1	1680	GC_00000044	other	emors_3_1	81433	37	38.2															MSIQKRKGKWERSSLGHIDSKRKAHPLNFKAKSIAAHHLISCEVASKLSSIRKKQIKYKGYDINHPYNLVFLPMIDQISCQYNVPLHKSGHTDSKLEAYYAEQSGSNINDEVSNLISERDKETNENKLSLLQGDIDMLNNLKGYHRIVGSMLAKTLKSLDCDDNSDDFVDSLDELSFDIATKLGRFQLHLISRGRHMQSGQDGCHYCRQDGNRNKHYHVTDNIPTQDYVKEYCYKGLRLYTVQEKA
1	1735	GC_00000048	other	emors_3_1	81433	37	38.2															MKMTDTKKHAIKRLILNNHWEFETRTISKNGKQEIGAYSGNRTRIISLEG
1	1814	GC_00000056	other	emors_3_1	81433	37	38.2	K01154	type I restriction enzyme, S subunit [EC:3.1.21.3]									31.407	6.25e-44	WP_000014001	restriction endonuclease subunit S [Salmonella]	MSSLPKGWANSELCNITEVVSGNAFKSKDFVENGIPVVKISNVQSGKYIEKNQEYLPDSFVNESNARFIVNHNDLLIALTRPIVSNKLKVCTYPNKKQVGLLNQRVARLDVYEGSSECFLHYYLSSKGFKESVQASMSETLQPNLSPKSLSKIRIDYPPLAEQKRIVEKLDEVLAQVDTIKARLDCIPSLLKRFRQSVLASAVSGKLTEEFRTEWLEEKIQLILSLQPTAKTRRGVPDNVPIDEDLLKQEIPKQWVVESVARLLKLAVITDVKDGNHGANHPKSSEFVDDGIPFITAAQMNDKGHIDFEGAPKLKGEPLSKLKVGFAESQDVIYSHKGTVGRVSVSDRDCILSPQTTYYRLNQTFIIPRYLAVYLQSQQYKNQVNKVKTQTTRDFVSIS…
1	1823	GC_00000057	other	emors_3_1	81433	37	38.2	K06940	uncharacterized protein									46.25	3.26e-21	WP_117611299	YkgJ family cysteine cluster protein [Bacteroides ovatus]	MPFPCTGCGLCCQQIHNIVELQEYHSGDGVCIFYQKQQCSIYQNRPIVCRIDDAYDQIFKTRFTIDEYYKENAKICNQLQMNAAMDAIYKVRL
1	1831	GC_00000058	other	emors_3_1	81433	37	38.2															MAIPWLIGAAVVGLVGSAIKSSIEEDEAKERQERWEREERSRLRQEEQERIDNARKDEALRVQRQIEKEKKALIHQESMRLMEKYEISDLSSTEFKSYISNIIVNGVSDSTSEIEKILSSSKKMIEVKEEESQLEKQLKELKEIQRYLESI
1	1839	GC_00000059	other	emors_3_1	81433	37	38.2											28.804	6.91e-07	WP_117586042	50S ribosome-binding GTPase [Prevotella copri]	MKLDISIMSEKFQHSLSRLDKIIYSDQKPRIAVFGKYNHGKSTLLNAIFGYEAFKSADKRETVENLSIEHDDVMWIDTPGLDADVHGKDDAAALTGAFEMADYLFLVHQVTAGELDKYELDIFNRLAVNTTDYSQKMCLVLTQIDQKTGDELNTIIDKVQQQVSLESQFKEVKIIPISATRYLRGLEENKPIFCEKSGISTLFDEIEKIKNNVIKTREKEKFELINKIAHSLNEMELAINQEMNINKNKQVSLKSDITCELNKLITKVA
1	1847	GC_00000060	other	emors_3_1	81433	37	38.2											31.967	1.06e-06	WP_117586042	50S ribosome-binding GTPase [Prevotella copri]	MLTAFAQIKENIITSAPLINKYRDINEVKKELFDIIDNDTLQIMLYGAYNAGKSTLINVLLGEELAVVNDIPTTDKVDEFNWCGYKLLDTPGVNAPIEHEKTTNEQIKRSSVMLFVIREGDQDSKDLYIRLFEMLALGKKVFIVLNHQLTNDDDKAMAYKKIHSIVMSQAPKYGIEDKQIRELVVCPINLKTALNGRLNQHDKLLDHSGYTNFISLFEQWVKMNDAEQERLEHAISAVNTLWYMPTITELKQDGTDESNDALLNFRQDLAHLQARKKGLILESREMISHNVRLMKAQISQTLTQSTNQIELDTELEALISPLYKKVELWLEESLSHHYSTLSCDVQHTLKQASEDKNNPFFDSMLNQAKTFFSDEKTIKQGLLYGRKFKIPGLKGRWEK…
1	1863	GC_00000062	other	emors_3_1	81433	37	38.2											40.996	8.03e-51	AAC46428	unknown [Acinetobacter baylyi ADP1]	MVKNENVFVTSLRDFTGDFVLVNNREDELTKMQFEFESKIKKTLENSNGKLKKESLLFSLTDALKVSVLNGIKEWNEKLIDSLPMKKLSEEYSDRIILLVFGKVNAGKSSFCNFITEQFPNEEIKRFCFVDNRIEYFEQSFAEGVVETTATIQGVEIGRNFVLLDSPGLHSIVDENGDLTRRFTDSADAVLWLTPSSSPGQVQELTDLKLELEKKKPLLPIITRSDQLIEDWSDELNDLVHTIVNKSESIRQLQEVDVIERVKALGNVDDLKSAISISIHAYREHQEKENAQSQAGLNRLFSSLSDIIHEAKEYKVEKANQQLINFINDNVLSTLEKDISPQLLKLKDQTQKTLDDLKKKESLIISELLTTVKSQVRGVVEQHSASQDKVAISSGLNQL…
1	1917	GC_00000069	other	emors_3_1	81433	37	38.2	K01153	type I restriction enzyme, R subunit [EC:3.1.21.3]									70.289	0	AAA97247	CG Site No. 620; alternate gene names hs, hsp, hsr, rm; apparent frameshift in GenBank Accession Number X06545 [Escherichia coli str. K-12 substr. MG1655]	MQKSNFEFLKGVNDFLYAIARAAENNFPDDPNTTLVKVRIFGEATAKHLAKLLDIEAPDNQHELLRELGKIPFVDDSILTVFHKLRKIGNKAVHEYHNDLQDAEMCLRLAFRLAIWYYRLVTKQFDFAVPVFILPSSENKAQFEQEMHSLKQELVLVRQGEAQTKAEVAAQNAKLTALTGYISVLESKQEETQGQTQERIAALEAQLQRKDEEIAKKTEAERKAYKKQITDQAASRSLDLSESESRYLIDNQLRKAGWDADSKLLSFANGTRPQIGRNIAIAEWPTGKDETGKTGFADYVLFIGLKAIGVIEAKKANKDVVAKLSEAYRYSKYFDNDFLRNELQHAANDQTALDQIAELLPTYLPTWSDSSNSEPYKIPFCFSANGRAYRSAIKTKSGI…
1	1924	GC_00000070	other	emors_3_1	81433	37	38.2	K03427	type I restriction enzyme M protein [EC:2.1.1.72]									49.706	2.68e-162	WP_117017508	type I restriction-modification system subunit M [Aeribacillus pallidus]	MNNNDLVAKLWKLCDNLRDGGVSYQNYVNELASLLFLKMCEETGQEDDLLPEGFRWTDLKAKIGQEQHQFYRNMLVQLGADDHAIVRAIFQNVNTTITQPAQLTELVSNMDSLDWYSDEDGDKGKSRDDFGDMYEGLLQKNANETKSGAGQYFTPRSLISTIIEVMQPQPREIIQDPAAGTAGFLIEADKYIKSNTDNLFALPGEDQEFQMKKAFVGLELVPETRRLALMNCLLHDIEGDENEGAIRLGNTLGSAGENLPKADVILTNPPFGSASSTNITRTFVHPTGNKQLCFMQHIYDALEPGGRAAVVIPDNVLFEGGKGTEIRRDLMDKCNLHTILRLPTGIFYAAGVKTNVLFFQKGTPENPNQDKGCTKETWVFDMRTNMNTFGKRRPLTEKH…
1	1939	GC_00000072	other	emors_3_1	81433	37	38.2															MKPINYVIAFLFLFVQPSYAFEHSNANPGSAEFLIAACQEYTELYNKKDEQGFGTFFTTSKEESFRAGYCLGAVMHTNSKCSYPYTYTPSVYQAAKVIASVNVKQRYSETKLLEDAVCR
1	1945	GC_00000073	other	emors_3_1	81433	37	38.2															MIRSGNQYGCHFRFNNIKNKIRTLARVMQKNISTASKIWHGTKLFIKWFWLMTMFLLGVSLLLVMPLIMFEYSFSLSELDLIETLFIVFLVVFIYQYGKRCRQIDAPLVRKIITPWVHQAHIFLVFYSLTLISAPLLELNLRELERMPLLDLFGYILMAGTFGYSYYRIGLFAKKTVETVEVITTEGAVE
1	1951	GC_00000074	other	emors_3_1	81433	37	38.2	K15045	radical Sadenosyl methionine domaincontaining protein 2									40.418	3.06e-71	RGE41128	radical SAM protein [Comamonas testosteroni]	MNQANQLVINYHITEKCNYDCHYCYAKWAKPNELHRNVDDMKKVLSNLAEYFLSPNPIQKQLQYQSVRLNFAGGEPLLLKQRFIDALDYAIELGFEASIITNGHLITDQFIIEHSHKLQLLGISYDSYYAERQQQIGRVAPAGKVLSPERLQSIFKQIKRQSPTTELKINTVVNQYNTEEDFTDLITKIQPNKWKVLRVLPVFDSIEPIKDQQFDAFVERHESVAHFMSAENNDSMTNSYLMLSPDGAFFQNGNDELGYFKSRSLLTTPIDIALAETGFDAAKFAQRYQ
1	1957	GC_00000075	other	emors_3_1	81433	37	38.2															MSLVTTNQAVKDLFGIEGSEPLRSKANSYLRNGVIPSSLVIDDGFSDESMGKRGKKLLKSQAVHCLFNALVLDAFFNDTKFVKAIFEQSRTRVASVALCEEVLLKAQAVATVSHLSNLAQQFLSQLKDESFNLREYRLTCPFDDQRLPQMDMALQNTGLLYQLLRAQRLSLSHKEQIWLCWLEQDLAAASQLADQVDSALLETDMALKEMVKRAHKEYQEAQSFNALLSSLPD
1	1963	GC_00000076	other	emors_3_1	81433	37	38.2															MNQQQITVESGVKIKIITPKAPPLIINRAKKLISKIFVQDILRGMRPKVIQRNKKWLSYRVNRKYRLLVLRTRCNTGPYYCLSHTEFDHWVNNH
1	87	GC_00000001	flanking	emors_3_2	81358	37	38.2											47.917	1.61e-27	RGC81918	PTS fructose-like transporter subunit IIB [Hungatella hathewayi]	MKIVAVTACPTGIAHTYMAADVLKKAAAKLGVSIKVETQGAMGVENVLTPVDIVSADLVIIASDIEIEDKNRFLGINSKQFPIETILTDVEGILKKYLF
1	88	GC_00000001	flanking	emors_3_2	81358	37	38.2	K11203	fructoselike PTS system EIIC or EIIBC or EIIABC component									61.746	0	WP_117709256	PTS fructose transporter subunit EIIC [Fusobacterium mortiferum]	MDITSLINANVICLDLTSTSKEDILQEMVQILDDAGKLSNKTQFLSDVWAREEIGNTGFEDGIAIPHAKSSAVLTPSVAIGISRTGIDYGAEDGEPSDIFFMLASTDGDDNQHIEALAQISSRLIEDGFTNKLKKANSKEEILDLFTDIIQPNTESSDIENTQPPTEKSELTRKLGRTKEHLLFGTSHMIPFIVAGGVLLSLSVMISGQGAVPTEGILADIAQMGIAGLTLFTAVLGGYIAYSIADKPGLAPGMIGSWIAVQQYNTGFLGAIIIGFFAGFVVRSLKKIKLPESMASLGSIFIYPLVGTFLTCAAVMWVIGAPISNAMAALNEWLASMAGSGKIALGAILGAMAAFDMGGPINKVATLFAQTQVNTQPWLMGGVGIAICTPPLGMALATF…
1	181	GC_00000002	flanking	emors_3_2	81358	37	38.2	K07001	NTE family protein									31.25	4.71e-101	WP_119143698	patatin-like phospholipase family protein [Pseudomonas reidholzensis]	MRHVFRLNLWFVFLATFLFTPYLYAEPIKEPSRPKIALVLAGGGAKGAAHIGVLKALEELNIPIDIITGTSMGAYVGGLYATGKSASEIEAYLHTVDWYSGYQDEVGREEKNIRDKKYEDRFAINPSLGIRKEGVKSPKSAIQGQNMLKILRETSGNPVFVASFDDFPIRYRSVATDIVSMEEVVIDHGLLVDAMMASMSVPGALPPYEFEDRLLIDGGVTNNMPVELAKEMGADIVIAVDISSNYMTKEQIGSLFDVASQLTNFMVKRSTQEQAEFLTDKDILLQPRVGDIETTDFSSMPRAYQEGYDTVMTLKSRLKSLAVTPNEYAQYRNKIKQQSANVRLAQGTIIDKVEVENRSHYESDKLERFIQFEQGTSLNSDYIEDKIHALYATNRFETI…
1	250	GC_00000003	flanking	emors_3_2	81358	37	38.2											30.097	1.17e-08	WP_116986099	phosphoenolpyruvate--protein phosphotransferase, partial [Escherichia coli]	MELNTIDYRITFFVKDQGLPPQVASQLTRLAKKFKSLVYIDNITQNRSTNAESSLGLLQVGLCPGDFCQLITVGMDAEWANFVLTDLLSSTFDFVASDKLCDFSETITNTYPQLTPQCEVDFHYVKAQAVLSKFEILKGLSQLIYPKESDELLLALIKREERSSTAMAKQIALPHVISPYVEKPTIAIIRSDYPVDWASKMGDVNVIIALVLPEKPTKEMIMAATYLTRSLLSEDFSQRLVHTRQPKGLQALILYAMCQLL
1	318	GC_00000004	flanking	emors_3_2	81358	37	38.2	K01809	mannose6phosphate isomerase [EC:5.3.1.8]	M00114	Pathway modules; Carbohydrate metabolism; Other carbohydrate metabolism	M00114	Ascorbate biosynthesis, plants, fructose6P > ascorbate					62.148	4e-174	WP_005478337	mannose-6-phosphate isomerase, class I [Vibrio parahaemolyticus]	MNALKPQTFYPMTNVIQDYAWGSHTSIEALFDIKNNTGKPQAELWMGAHPNGCSAVTVNGDSILLSDLINQDKEAFLSKTTADAFGELPYLFKVLAAEKALSIQVHPNKQQAVDGFEKEEKTGIALTAFNRNYKDNNHKPELVYALTDYKAMNGFRDYQEIVSLFSAMQLPTIASYVDDLAQEPNSNGLQRFFKAILSLENETKERAVAELLDYASSSTDELFVLLQDLAIQYPNDVGLFAPLMLNVITLKPGEAMFLNACTPHAYIHGTGLEIMANSDNVLRAGLTPKYMDIDELMSCTEFVSQPLSSLLTQPNTVDGGMSYPIPVNDFKFSVFTATDALTLETNSAEILFAIDSDLTLTHENGDSVTVAKGHSVFVPAYAKRYSLTSSGNVARAYN
1	384	GC_00000005	conserved_T6SS	emors_3_2	81358	37	38.2											50	4.71e-11	P96156	Chitodextrinase; AltName: Full=Endo-chitodextinase; Flags: Precursor	MIKLNKITAAITSVMFSGYLYAADASAASNLITFVPGETKVQNGDMVSFNGDCFVAKNNPGVWESPTADSWFWDVAECSGEPNPGPGPNPGPNPTPDPDLGDIIPFIPGKTQVENGDVVSYENQCFIAQNNPGVWETPSASSWFWTLTECSDEPVNPEPEVTELSILAPIAGQVLTANEAISINAHVDGNLAAKVEFWANNTKLAEKTVNQNNTQYSQTWTPSEEGNATINVFVFDKNNQKIEQKSVSVTVKAEVTEDFVAPVVKFVTPANGSTINVTESLSISVNATDADNDLATLVVKANNKEICSFDAANTDTFSCDWQPTQAGNVTLNAIATDVQDLSSTATVKITVEEDVVEPPVEPPVTPGDLCKDFNVYPDWTRGDHATGGDIMVHDNIAYS…
1	434	GC_00000006	conserved_T6SS	emors_3_2	81358	37	38.2	K11892	type VI secretion system protein ImpK									24.8	1.8e-08	WP_010910863	type VI secretion system protein TssL, long form [Mesorhizobium japonicum]	MSYVEDDVTVVLFQPEPGKPMEVMPAPDLSRNISVSELDISSMGINPLVDQFSWLIASLSCMSSIPWLDDPMPFREQVAREIRKGERMLNEMEVDRASILVIRYCLCAAMDESVCRQEWGANSNWSQNSLLSEFHNETSGGDKFFVILDRLKADPRKYRHVIEFLYLLLQLGFKGKYGRAERGAESLTEIGNTIYRLVRDERLAEQEKVALVDVKSKYLKKPLKRVLPPKLILGVSALLFAAMYAATYLVIDVRFQKLLSLYQ
1	473	GC_00000007	conserved_T6SS	emors_3_2	81358	37	38.2											41.849	2.55e-99	WP_011105819	hypothetical protein [Vibrio parahaemolyticus]	MTIFIVIFTIYMVYVSRCHLFTNKYNACSLITTTRFYIFMRIFSFLKLFAGLGLILLISSCGGESKDTSPPKRETTSVSGILFDAPIAGARVVLWEYANGAIGKKLGETRTSSKGDYSMEVNSGSMPVLLQAFGGAYTDPATGEVVYEGDGKTLKFESTAYFYENKANRIMLTPLSLISKGLADYKIHKLGMDAKGAIDSANSTISNMYGFDVITVEPIDIVKGGQSAYVTAGHQYGAYLTAYSVFSSDLIKKYPASDSSSIYTSFTLSDIMYRDISADGQLDGYETDNISGLDKKISFGKESVSVETYTNILSQYILITVNNNRLNVSGTNPNDYKPFASKVNKLGTTPETMTVFPPRTEVPIDDTEPTVERSDKDVLVRLDSLDLLVKDNVGTKSLR…
1	512	GC_00000008	conserved_T6SS	emors_3_2	81358	37	38.2	K11906	type VI secretion system protein VasD									26.984	5.13e-15	WP_010910850	type VI secretion system lipoprotein TssJ [Mesorhizobium]	MQKLLTFSLIFLLSGCTMWDQFKESTGITPETSSIELIITADKVLNVREGGQSSPVILRIHELNSPVLFRNLDFFALFENDKDALGDEYIKRYEYQIQPGDVVHETLVLDPATRAIGFSVAFRDINGSSWRKVELIEEKSEYFLKLNLKESELSSNNTRGIEQIYF
1	550	GC_00000009	conserved_T6SS	emors_3_2	81358	37	38.2	K11893	type VI secretion system protein ImpJ									33.333	2.23e-84	WP_005463797	type VI secretion system baseplate subunit TssK [Vibrio parahaemolyticus]	MSLYNPVVWQDGMFMKPQHFQQLDRFQGKQSGMLSGFESPLHWGIKRIEINTELLALGKIGITHAEGILQDRTPFDLPLHASLPEVKDVDASVANKVLYLCCPLPSERSELFGTSKDGARYSIHTQDAVDACYDSEEIANITIGKLNFCLMYEDEDKSAYTSIPILKISEVKPDGSIILDNAYIPTCIDINASTVLKKFTTEFASMLRHRAESIVQRLGVVDQQGVSSVSDFMLLQALNRYEPLFWHFANIEGVHPEAFYRVLLQAEGELATLCSSSRRPQEFVAYNHGNLTSCLSTILHNSKVTLSVMSEQRAIPLPLKEQGYGIRIAPISDRSIVESTTFILAVKADVTLDILHTQFVSQTKIGSIDNIRELINLQLPGINIKPMPVVPRALPYHAG…
1	588	GC_00000010	conserved_T6SS	emors_3_2	81358	37	38.2											66.5	6.66e-98	WP_011105828	hypothetical protein [Vibrio parahaemolyticus]	MAKPIQLGFMALIMACSLPAFAKGERYGIAANFKTIESTEYEQGMSGELSTISYGLVHTRPIDENNNRWRWLFGFNYLSDYIEAPANGVYQEVTNYEFRIVPQYALGNWWAFTPYVGAGLSLGYSQYGNRWKVDDEGYKYGNQLEDIDQFEVGAVLSFGTVIKLGSNPDAHLQIIPQASYIQPIYNDGLGGLELSVSLLF
1	626	GC_00000011	conserved_T6SS	emors_3_2	81358	37	38.2											39.13	0.000438	WP_117539334	FHA domain-containing protein [Coprococcus catus]	MHLNQLTLFITKSPEEYTGSKHIEMPESGGSLGRNPSNTVSLVDHNRFISGSHCLISIYGDTYYLSDVSTNGTLVNGNKLLKNQPISLYDGDTIVLGRYEISVGLEKLSNSVNIAADISEETDSTDPLVNLAEYTPDEEKDKGNIADLFKETRIDKVDSSDPVAHLNFITQTNNDDHLLHGNEKKQEQKIKEPIHTRQLLDDSDSVHSEFDVPNLIPEDWFSNDFTDTSIPPVQVNEPIATHSEPESMMHSFTDSTPETIISSASEISSVTEQLAWEDVTQTIQPSVSTTEPKSDEFFIAPSTSMDVYPSQSIETSFNSKMSDDAASAFYKGLGMSASQIEQTDEQFFQQMGNCLRLCINNLQKELSELKAIKNNEQDDSMTNIVELMLSLNHQQLLSP…
1	663	GC_00000012	conserved_T6SS	emors_3_2	81358	37	38.2											30.882	1.68e-20	WP_116949140	Lrp/AsnC family transcriptional regulator [Jiangella endophytica]	MSNMNLQGLDKLDRRIISNLLSNGRESIANLSRNVGLSRTAVAERINRLEKTGIIKGYTAQIRMGNKDENASSYLLISCNKGQKDSVSDGLKEIPEVKMTSIVGGTYDIICLIEAPDLHRIHYLCSEIESLSGIKEVKNTIVLHQPVCR
1	699	GC_00000013	conserved_T6SS	emors_3_2	81358	37	38.2	K11901	type VI secretion system protein ImpB									40	2.67e-32	WP_117580760	type VI secretion system contractile sheath small subunit [Enterobacter]	MSRDGSVAPKERINIRYVPATGDVQEDVELPLSMMVVGDFTARTDETPIEDRTPINIDKDNFNDVMEGYSPNVKVNVDNKLSDEEGAQLGVDLTFNSMKDFSPEAIAKSVPELNGLLELREALVALKGPLGNVPAFRKKIAAVLQDEEARQKLLEELNIGSAKEEAKAE
1	735	GC_00000014	conserved_T6SS	emors_3_2	81358	37	38.2	K11905	type VI secretion system protein													MEKGYRLLERIELGEPKNCYEKVVSHKHLIESIHLHLADLLNTHAGNAMIDNDYGLPDFNDVLSNNTNLVRNIQQNIKASIEKFEPRMRNVEVHYRHDNNNPLQLGFGIGGEVIHNGGKVPMAINIFMGVDGQFNV
1	771	GC_00000015	conserved_T6SS	emors_3_2	81358	37	38.2	K11900	type VI secretion system protein ImpC									60.288	0	WP_117611541	type VI secretion system contractile sheath large subunit [Escherichia coli]	MTAEAQAPEQEAALVESGSLLDSILNETRLKPSDEGFDVAKRGVEAFIGELLSTNTSDKVDQSLVDLMISEIDQKLSKQVDAILHNEEVQAIESTWRGLKYLVDHTDFRENIQIELISAKKDEVLDDFEDAPEVVKSGLYKQIYTREYGQFGGKPVGAVICDFQMSASSPDIKLMEYMANVGAMSHAPFITSASAKFFGLDSYEELPNLKDLKSVFEGPQYTKWRGFREHEDARYVGLCTSRMMLRTPYSVEDNPIKAFDYNEHVKDGHDNYLWGNSAYAMASKISESFAKYRWCPNIIGPQSGGTVSDLPVYNYESMGQIETKIPTEILISDRREYELAEEGFIALTMRKGSDNAAFFSANSVQKAKVFPNTPEGQQAEMNYKLGIQLPYMFIINRLA…
1	807	GC_00000016	conserved_T6SS	emors_3_2	81358	37	38.2	K11903	type VI secretion system secreted protein Hcp									52.326	6.63e-65	WP_137712216	Hcp family type VI secretion system effector [Brenneria rubrifaciens]	MPTPAYMSIKGETQGDITKDAYSADSVGNVWQEAHVDEFLVQELDHVLTVPRDPQSGQPTGQRVHRPVVVTKQQDRCSPLLFNSLVSGEKLPECNIKFYRTSTSGKQEHYYTIKLIDALLVDMQTRMAHCQDAAMSDRVTEEVLKFTYRAIEVTHETCGTAGNDDWRTPREA
1	843	GC_00000017	conserved_T6SS	emors_3_2	81358	37	38.2											45.455	5.7e-08	WP_117031792	DUF2169 domain-containing protein, partial [Klebsiella pneumoniae]	MQLWDIDSESPFTLKGRFQRDSEGHEVWVLSMKRAWTFLDGSWSEEVDNLELNDDPIYLGEPGFSAMVADHDFPIYKKNTDVLIYGKARSYAKKPVHSQLCRVLIDEHIDKTLKVVGERHWVDHSGSITVSTTQSFIERDIDYSNAIGGDERNRIGGGAAETNVELLKAKVPSIFYPDQNWQASSKKVKVAGFGPMPPFFHDRAKWAGTFDEKWFEERRPVWPIDFDDRFYQSAPQDQQCNGYLQGGERLMVSGFCHNDALSFRIPSEKFQAVAVFNGKEEKINMPMYTLWIDTENKRIEATYTAAFPCQNREHLLTSSYLVELP
1	879	GC_00000018	conserved_T6SS	emors_3_2	81358	37	38.2	K11895	type VI secretion system protein ImpH									32.344	1.67e-54	WP_000348794	type VI secretion system baseplate subunit TssG [Escherichia coli]	MIQYIINKPCDYSFFQAVSLLEKHYQNLSGIEYKAIGENQYVKNEYIQFSVSPKLSFPKSDIEFITEFERNDASYTQIEVNFMGLHGVSSPLPASYTEKLAGRDPDDNPVKEFFDFFHHRYISMLYRVWKKYRYHIQYKSDAKDPFSGRLLHLVGLSSVIQESSEVDLDRAKLLSYVNQLSTRTRSPKLVSGIVSHYFTLSNVYIEEWVYRRITIAASQRNCLNRKNCQLGGDFHLGQSMADLTGKFNLCIDDIDFDTYVKFLPGGALHETLIGLMKFILCDPMAWDLKLTVRNKSLPINQLGDGLGNELGQTFWLGAAKGEETKIKIVGSN
1	915	GC_00000019	conserved_T6SS	emors_3_2	81358	37	38.2	K11914	sigma54 dependent transcriptional regulator									41.463	2.36e-77	WP_126397535	sigma 54-interacting transcriptional regulator [Blastochloris tepida]	MSLAKSDSLNNALLAISQSLADRSQLALTLDAILAAARQLTFADHGIIYVLDQTGQALLPSVVHHNEHILAEHPWQPLTLESIDETDPFSFAIQNGEVVLINDLYQYNGYQCDEIYQNESILNRKSKNLLAWPLIDNEKNTVGLLVLFDLNVINDEASLTCFCQMAATNIRQAVWLEKYGYMIKELSEDNASLTRENNQLKQRKQSQYSGPIAESEVMLNALARLDKVLSLPVDVLIRGETGVGKEVIAKYIHENSNRSKQALIVQNCAAIPEQLLESELFGHKKGAFTGADKDKIGLFEAADGGTLFLDEIGDMPLLLQAKLLRVLQERKFRPIGGNKEISVDVRVLAATHANLMEKIKKNEFRADLFYRLNVFPITIPPLRERTEDIIPLSEHFIKL…
1	951	GC_00000020	conserved_T6SS	emors_3_2	81358	37	38.2															MKPYLLLLPAALVVAGCSNQTSVPDPLAPYKNVHIIGNKKQSIGSFNYLSKDVDGYTDKQVIVYFNEIPFTSTFNLCADKGVYIANCKSTVSIFPSKNKGVIFNYDLNFYNGSYPARVGSMNILLPSTTTRKMDNLTQYTSAKFSEEQFLESETLEEATFILMKSS
1	987	GC_00000021	conserved_T6SS	emors_3_2	81358	37	38.2	K11891	type VI secretion system protein ImpL									22.863	2.4e-67	AFJ27267	IcmF-like protein [Escherichia coli Xuzhou21]	MIKNTLARTPFILSTVISAFFALLLVGVYYLWFNQADLRLLWGMLGIIFSIFTIFNLTLYIKKRKNKSHQNIETEEDTLSMVLKPLLHKAGKKPVYLVLGNKGSGKNQFLNVSNAIKPMDKVKNVKNDFFEWSESDSAVYIKPNHRLTFQEISSNDSLLWDALINEVIKHKPRKPFAGCMLLIDFEFLIVHDDEQTDYTLNALLQRLESIKETTGATLPLYLIMTKLDKLEGFKEYIHFSPLKSSVEFLAIPLKDAKGAILDYFRDSYKNIVKVMESNALDSSSYTNNPDEKQTILAFPKQFELCEKEISRIIERLNELNQGTYSIDIREVFFSSSLQGGRKYNLLAKSCSNYFNLPIIASEHGQLTETPYFTRFLVDAKVLPESDYSAENQHYLKRIQ…
1	1023	GC_00000022	conserved_T6SS	emors_3_2	81358	37	38.2	K11896	type VI secretion system protein ImpG									32.241	4.4e-90	WP_117681754	type VI secretion system baseplate subunit TssF [Klebsiella pneumoniae]	MSNSKYFQDELTYLKEAGSEFAKYHPKLTHFLSEGTFDPDVERLLEGFAFLTGRVREKIDDELPELTQSLISLLWPHYMRSVPSMCISELVPHSGSVTEKIIVERGAEMASEQVEGTQCQFRTCYDVALYPLSIQQIEQNNSRTNSSLHLTIAANNGLELSRIKLDILRFHLHGEQHITRSLYLWLFRYLEYVELDVGGGYKHRLRADQVVPVGFGDDEGILPYSKNSFSGYRLLQEYFSLPDKFMFFDLKGLEWLGGIPQRSTVKISFAFSRALPSEVIVKNKHFKLHCTPSVNLFEKDGDPIRLDHQLNEYKVRPQSSNQEHYEVYSVESVESWSKAERCRKKLIEFESFEHQINQRDKRDFYKTKVSERINGRGLERYISFHSHNNQVSELGSETV…
1	1059	GC_00000023	conserved_T6SS	emors_3_2	81358	37	38.2	K11910	type VI secretion system protein VasJ									24.063	2.02e-25	WP_119144555	type VI secretion system protein TssA [Pseudomonas reidholzensis]	MASLNFESLLKPISEVAPTGEESKYEFCYELMELEIKKFGSLFGETVDWKVVETNAIEVLTTYSKDLKAICYLIRALIERNGFIGLDEGLNLLKQSLVLFGTDLFPQRKRARDGAMEWFVAQLETTLPKLDTSTTNWESVASYLQRINEISDQYHEAFSDSDVEFYLITSVLNGISQRVVGVSETNTNTSVKMTSEPEPLVEETTSAVTEVKTLSQVATKVPKTVNTVKQEVDIDTDFSSPSASKRTLKKVAEFMLHSDISTPLAYRLHRNCTWCEVDELPPHDNDKKTPLSLAVSQDQLSEYRDKAKQETESEVIKRLERTLTDAPFWLTGHYLMFQMLTNLDHHEAAEAVKQETQYFISQLEGIELLTFANSTPFADEETLKWLSSNTTTTPVAVAA…
1	1095	GC_00000024	conserved_T6SS	emors_3_2	81358	37	38.2	K11907	type VI secretion system protein VasG									45.614	0	WP_117580830	type VI secretion system ATPase TssH [Enterobacter]	MININLSSLIQRLHPITKVALEDAAALAVSERASEVQIEHFLLSLLERPNSDFDQLLAHFECSENLLRQAIKSTLENSHKSNGGKPVFSAMLIEWLQEAWLVSSLDLSETQIRSGALLLTLISNPLRYGQHGYSSLLENINPETLKRNFAELTSRSIESQVATSEQTHAREDGSALSKFTTDFTGKARKGEIDPVFCRDQEIRQIIDILARRRKNNPIAVGEPGVGKTAVVEGLALKIVQGEVPDCLKGVELYGLDMGLLQAGASVKGEFEKRLNAVLDEVKNSPTPIILFIDEAHTLVGGGNQAGGSDAANLLKPALARGEVKTIAATTWSEYKKYFEKDPALARRFQLVKLDEPSTEQAALIIRGLRTVYEKSHNVYVRDDAITAAATLSDRYISGR…
1	1131	GC_00000025	conserved_T6SS	emors_3_2	81358	37	38.2	K11904	type VI secretion system secreted protein VgrG									37.455	1.45e-117	WP_002213876	type VI secretion system tip protein VgrG [Yersinia pestis]	MVSDIEFKFEVLGTEHEFRVESFNVVEELSKPFHVSLSLLSLDADITFDELIRKPALLSIFGQGVATARQFHGVVNEVRYLGEGRRFSRYQITLVPQLWFLTQRQDCRIFQEKSVVDIVTEVLDGAAVTDYRFDISALYPTKEYVLQYRESDSHFVQRLLAEHGLWYYFEHTTANHTMVIVDKNDAIAELENTPLNSSYVGPVIYQADGGGNADREHIFDLESINRVRTGHVTHTDYNYEQPRIPQKMESSGLIDTDLAFFDYPGRYIEPSQGLVRADELMAESVVDNYQIEAASNVMRLIPGYSFILDKHPRRALNRDYTILTVTHSGYDPQVHEDEANEMPTTYQNQFSCLPSDIEFKAPKIAAPVVDGPQTAVVVGPAGEEIYTDKLGRIKVQFHW…
1	1167	GC_00000026	conserved_T6SS	emors_3_2	81358	37	38.2															MVRLQLTNSIEVAGAIDENSQAESLACVPRFGKVISLHPTMPDRIYVEFDGLATGSTALAKIGRLFRKSELEFAIESGLTCRIEFLNGDITLPVLTDIFFSLLDDDQPVILRAKSLIIEAENELIVRSGATQTKYSGRDGRVTTQAKYITSQAEKAQKIQGSTIAVN
1	1203	GC_00000027	conserved_T6SS	emors_3_2	81358	37	38.2	K11911	type VI secretion system protein VasL									45.287	3.99e-124	WP_011105827	type VI secretion system ImpA family N-terminal domain-containing protein [Vibrio parahaemolyticus]	MLGLKFNMNLSDFARRPISIEMPSGINPNSLDDFSEIKREVNKLNTVTSKISWKHVFKLSKSILETESKDIRCACYYTVSATHIDGLKGLVNGLNALLDICVIYWHSGYPDVNKTTARMGAFEWLTEHTIKKQKTLKISPTDLVLIETGHKLTLKIEEELRSHYGNKSPSLGAIRRIFSQWIEEIQTTKLSLEEQRLKKEAIEKQNNSGINVNVSLPPRDESKKTAQPTMTHTEKDKNIKPMVTISLAFIFILTLLFGHFLYADNQKSTLLINIQKADLTTINPLISQLENKEDDLKQYVKTALIKQALHLNKDWEVTSTKVDKINELETLNHSLKNLYSDSAAVKKLEYEFNQQRADFENEYSDIHRRFLKSRTIFANAKNHNSDENIVKAYSYSNSL…
1	1239	GC_00000028	conserved_T6SS	emors_3_2	81358	37	38.2															MSIYQHQYILDSDIVVPTGMNTELAIAIARADIDRFATFEDSNEKYTVASLEFVDQTCLMTKVQETLNVLITPLLDRLHISLKPLPLLLSVPQEISEHDLRNWIDESDFSDYLSNIKFSKNSGNAFLQECLNSLAEPDAIMCIAIDSLYEKKEALMSSRDAMSGTNPWGVLPSEGGAGMVLTKRNVLDTLKLIPQSKIVYSQFDWHSSDRRGCARLIRAASKHHDNLGPIYSDMTNQRAHTEDYGFAIGARSEVLPYAQQVTLTNEFWGTIGGGSGIATLATMNHLSTVGVLSTAFLFDQNNTRSLFILNREK
1	1275	GC_00000029	conserved_T6SS	emors_3_2	81358	37	38.2											30.526	1.93e-17	WP_138184353	serine/threonine protein kinase [Paenibacillus alvei]	MSELQGSTNDFINQLVVKAIEKKKKNEQTLANKLKPRLEHVLFSQFDVLETIESHNQKTTLYRLAKKDEPEKQICCKVLNSEQPEHVQEMFVAEATHLEVAQHPSIIDFIKLGNEFERPYFMYKWAEGESVAEKLTRHKYKSFRHDHIAWLIYQLAGALEYIHTKGICHLDIKPSNIIICEDDSIKLIDFGAAQYINDSRKYNEASLSYASPKYIESGKAVPQDDVYSMALLVCALFTGYSDNNDWKALLQQRKRPHTIPKTVWNLLRLVVTKPRTHGLTPISFAQALAHIDMNVMQGSHNAPLFTQLRNADLVLRKSSKYDVFRLGRFKYLEASLAACLCLITFTVLLKSFAFTVADNNAVSLSDTSSRIKPAQAATFLSQPPWEIENALDNNSSDVV…
1	1311	GC_00000030	conserved_T6SS	emors_3_2	81358	37	38.2															MNRYRYLVDDVKKTLTDADKQQAIADIALAQEQLSSFSENMVNFLYTKAILAAETASFYIKQQYRFHQNGYPAKEIDYLTLLETQLSEIEKVFIALLRIHRGFVYVVYSEYPEVLAWLCLSKNIESQHDNDELTLLGISIIDQLDPELAMPLILRSNSNHIHKLLARFIEGGASKRELYYRCLVINQSVSVSLIKHWLEDKKLPEKMLHSYLALMNVGSSIEWLQELTNVDDLLFENLILKEDRATWFRQQYSVDTISSETANTYSKLLTLKEFSLFDIEKEQAVIHFILSGDTELVPLIIEHLMQLDEVDAQLWCEGLFLVYGEEFPFLPSKLGNTIEWQDALHEIVEWQEQIEVVKSVPLRMGQKLTFDSSIRAMKSAELSSSLREWLWRELCIMSR…
1	1347	GC_00000031	conserved_T6SS	emors_3_2	81358	37	38.2	K19304	murein DDendopeptidase [EC:3.4.24.]									34.529	7.69e-41	WP_116986330	murein DD-endopeptidase MepM, partial [Escherichia coli]	MKLKYLTFISINLAFIILSISLLYFSSNHSSVINGSQLSTSPQKNVFDEKKQKPDNLVINGTINDSFFSSALNAGLTSKQIFSFTEALHNSVNFIDGIEDGTPYSIVLDKDTSHIRSFFYTENNRLHTIQLANNGSYYNELGVNLSSNKLILPTGNLFRISSHFSKERKHPIVGIVQAHVGTDYATPIGTPVMSVSKGIVSRSEYHPLAGNFISIKHNNGITTRYLHLNDRYVNKGDHVYKGEIIGKTGNSGRTTGPHLHFEYIVNNIPQDFTKLHNDIEMPLNNKNQKKLLKCINLSKTLITKILKEA
1	1381	GC_00000032	other	emors_3_2	81358	37	38.2															MKKILLLALFSITLMGCNDPESAAAEAAQLRAEQHPDRTYVGENNYYTMESSGDIQFTTKKDLKIMYQDFPRYFIEKAKEWPKEDLNDASSYDLPRFQFAWANSSSKDEYESGIKIWSMKTDGTDLRLVTDVTVELVNGIKNLTRSPNNRYAAWADLGGYKTVYDIKTGKVVELSISMSPLAMLWSEDSRYLYFERARDLFSRWDSVTGEVSKVDFDVRTTAVNFGGKRTTVLDFGVLVEDANTNEEINWIGVDRSLSMDERSLDVTSIDPEGRYAWGSNPSFGFFFDIEKGTVKQMTTDYTPAQILGKNAHFSALDSFAKVRIVDRVGDRVWSWRAFYYGALSGDAILYNGLANNGLWFKGSK
1	1416	GC_00000033	other	emors_3_2	81358	37	38.2							EFF01293	41.248	2.22e-151	NA					MHFNCKLILSSSLSHKELEYILTPDEYIRLLSREKNSQSIINQLPVQLRQPLSISASKSVQSLLFSLNQKLTKAEWIAVSTTVRKTGLSDTQLAQYPQLKKQIDRVETTQPAKFVKANFKPVTDDVPLVRNLSFTPVNPSPEHKISIEFAGQWPNNAASLLLAKSGEQKEKIAKPRADIHASHRSIATFKDLEPEPRNLYLTIPMNGTPQPLKLLLAENIQPVEKEIEMDEWDTVLVPVVPMKKLGEEYSLHQIGYFYVIWNGKVWREITIDSNGYFCDLDIQHERQEPLPTRHVNINASEFFPEANMSFEKFELYQEGQKVFSGELDVCEQSRVFNLVAEEVELKFVDFEHDEILLTTFESPIKNNASNERQAMSYPMPHVWLPYKLLGEVQADCYVY…
1	1449	GC_00000034	other	emors_3_2	81358	37	38.2															MSALKTYDHGVYLLGAYFDLHDNGRTKEFRTWHQSSDLTKEADLRNVRPIPFTPVLVDDAVKPVLWGSNKDGLLCQLGYFDENTVPETVAKKQTFLRHKAPLTVNELSESQSYSLTFPPLNVIGQLAEKHTSVKALNDSLKDIYSKKLLPEKPDLTQFTISKIKVSQLAEPYKNESDKPLTDEQNDYNDWYDKIIASEVTEIQGIITPVYHSLGVVFSSDLYVGAEVSLIQVKLKQDSSGEVEKVLATSFVTKEAPKKTQTQEEQEDLKKILPSAVFNFDPKLIDDGYFLLRTRFWVEEYLQKQQEFLGEEVKAKFPDSVKQGQLKFETHIEHEESRTVQDVYTYELHEKVTFKPVSGFGKLSMVCGDLISLEECLIYQYPTALPSYSDFMIQQGNPVA…
1	1480	GC_00000035	other	emors_3_2	81358	37	38.2															MFFHQPTLTSLSLPPLQHKKTITLVILTIISVRLKITNRIESAHNKFYKNSMAIQFTSIVESGRFKDRKFARLVLNTIILIIVLMVMTLEILDDYDILDIFNDIQDNIIAFTTLCYMSALYSYGYQLPLFKHQWQVFLILYLTLAQAVYVLGYLTYTQYDQHSIIYLLSYGLFWSLFYGYLIYTINNLKNDIK
1	1510	GC_00000036	other	emors_3_2	81358	37	38.2															MNNEYHILSKSVFSQFLFQQTPKPIVPVEPDLLLEMTFSPKLFIINDIAEKVENLVQHGVEWLDARVDCSPSQPTDEQIKVFENFRMPYIHQTYRLTNEEKQYGKLNWLDLNSVNLDFSRLNNIPLEERLIFKLEEDFGYVFLHESVIELLKKHVKDVWVRDV
1	1536	GC_00000037	other	emors_3_2	81358	37	38.2															MCKQTNYSKYQKRVIKFLNDLLGADTPFTYERANNNHLKVLIDGVTKPLFTGSTPSDCKSINNFMAEVKRELKASKKEESKLSQPEKTGVVSAVTLSNDKLIQNCVKSLRTRITVLKEQEKESVLNNKCINGLNLKRIEIVKHSVSLALQARKQGTYLKPKELRTIEGMVHNHLNFMLPSMAYYAELLNSTSKDKLAKVQPNKQQASVHNESNKNNVISLEDKTQHAPTKEAKKLAKKPKQPVSNKNMNTKNSNSATELMAMSANNRVSLLRNLTKAQALMLIDDINQAMAANREEDIEAVIALIRDKDLPLDAIISRMEAA
1	1562	GC_00000038	other	emors_3_2	81358	37	38.2	K19135	CRISPRassociated protein Csx14									30.363	4.06e-21	WP_116935424	CRISPR-associated ring nuclease Csm6 [Verrucomicrobia bacterium]	MKNILIAVTGASPQVLTETIYALHTQGKPIPEAVYVITTENSKQTLKEGLFIQGYWDKLMTDYQLPPIAFNSDHIWVITDDNGNALVDAKGVDDQSIMADFITRKVALLTQDNEVAIHASIAGGRKTMAFYMGYAMSLYGREQDVLSHVFVDDEFEFVSDFYYPTPVDCFIQGKQGEAINAKEATVTLAEIPFVRMRRQVDECIINQMETHSFSKTVSALNSANNTQVRVSISTKEKTVEVAGVKIPLTSKHLAIYLFFLSKDNRKATLDRYFEDDKTQTTDYLCVLDKMKADVRLYKTMGLEDEGQWRQKDHAELATLTKDFVRQSLNGLHKSLKDKLVPDLFEKIKVHSDGVKSGATYLISPEVLFICDGIEL
1	1588	GC_00000039	other	emors_3_2	81358	37	38.2							EFF01536	48.338	1.79e-107	Toxin PAAR-like domain	45.361	1.19e-18	WP_119719572	hypothetical protein [Klebsiella pneumoniae]	MGVTVAANGLSVVHQGSGGEANATLPDVCLTKVGKPIVPIPYGNNAKSADLAKGTTTITMDGGNPVAIKGSTFSKSTGDAGGDKKGVASGTIEAEAEFISASPTVKFEGKGVCRLSDQMTMNKANTMCLGGAQNPSVSLTLEEEGTYTVDLFLSYSDGDPVQGATYKLVDQTGTIFEGNLDTKGKASISGIAPGEFDIEYGEDSREFTPNIPTKENPNYNPNASAQMLIDETKRGEIGFWESSWRKTAGAASWIWGVILGDFNDDATVEQIIANTAITMLPVVDQAADVRDMVANTMTLLNEEERDKPENWLALSLTLIGCIPVFGSAVKGTCKVALKSGKATSKDDLLAIMRAMGKGDPEKFLRTLDWADYAKQTSQIISDVLQPCIEVATELASYAN…
1	1614	GC_00000040	other	emors_3_2	81358	37	38.2															MNYSVITENYFSAKTSFSCIDSREMLYSKNNYEPTSSINPIIWEDSNGLIKDITHIIDNGDLCVSEEFAQLIMSFDPYGIETYPAKLILSDGTIQKRYILALNNIIDVMDREKSITEISPKRNKILVQALYLSEEKLLTYPLEKRILFRVKGAEIATFYSEDIYDLINNNERFNELRKIILNTSQEAPTF
1	1681	GC_00000044	other	emors_3_2	81358	37	38.2															MSIQKRKGKWERSSLGHIDSKRKAHPLNFKAKSIAAHHLISCEVASKLSSIRKKQIKYKGYDINHPYNLVFLPMIDQISCQYNVPLHKSGHTDSKLEAYYAEQSGSNINDEVSNLISERDKETNENKLSLLQGDIDMLNNLKGYHRIVGSMLAKTLKSLDCDDNSDDFVDSLDELSFDIATKLGRFQLHLISRGRHMQSGQDGCHYCRQDGNRNKHYHVTDNIPTQDYVKEYCYKGLRLYTVQEKA
1	1736	GC_00000048	other	emors_3_2	81358	37	38.2															MKMTDTKKHAIKRLILNNHWEFETRTISKNGKQEIGAYSGNRTRIISLEG
1	1815	GC_00000056	other	emors_3_2	81358	37	38.2	K01154	type I restriction enzyme, S subunit [EC:3.1.21.3]									31.407	6.25e-44	WP_000014001	restriction endonuclease subunit S [Salmonella]	MSSLPKGWANSELCNITEVVSGNAFKSKDFVENGIPVVKISNVQSGKYIEKNQEYLPDSFVNESNARFIVNHNDLLIALTRPIVSNKLKVCTYPNKKQVGLLNQRVARLDVYEGSSECFLHYYLSSKGFKESVQASMSETLQPNLSPKSLSKIRIDYPPLAEQKRIVEKLDEVLAQVDTIKARLDCIPSLLKRFRQSVLASAVSGKLTEEFRTEWLEEKIQLILSLQPTAKTRRGVPDNVPIDEDLLKQEIPKQWVVESVARLLKLAVITDVKDGNHGANHPKSSEFVDDGIPFITAAQMNDKGHIDFEGAPKLKGEPLSKLKVGFAESQDVIYSHKGTVGRVSVSDRDCILSPQTTYYRLNQTFIIPRYLAVYLQSQQYKNQVNKVKTQTTRDFVSIS…
1	1824	GC_00000057	other	emors_3_2	81358	37	38.2	K06940	uncharacterized protein									46.25	3.26e-21	WP_117611299	YkgJ family cysteine cluster protein [Bacteroides ovatus]	MPFPCTGCGLCCQQIHNIVELQEYHSGDGVCIFYQKQQCSIYQNRPIVCRIDDAYDQIFKTRFTIDEYYKENAKICNQLQMNAAMDAIYKVRL
1	1832	GC_00000058	other	emors_3_2	81358	37	38.2															MAIPWLIGAAVVGLVGSAIKSSIEEDEAKERQERWEREERSRLRQEEQERIDNARKDEALRVQRQIEKEKKALIHQESMRLMEKYEISDLSSTEFKSYISNIIVNGVSDSTSEIEKILSSSKKMIEVKEEESQLEKQLKELKEIQRYLESI
1	1840	GC_00000059	other	emors_3_2	81358	37	38.2											28.804	6.91e-07	WP_117586042	50S ribosome-binding GTPase [Prevotella copri]	MKLDISIMSEKFQHSLSRLDKIIYSDQKPRIAVFGKYNHGKSTLLNAIFGYEAFKSADKRETVENLSIEHDDVMWIDTPGLDADVHGKDDAAALTGAFEMADYLFLVHQVTAGELDKYELDIFNRLAVNTTDYSQKMCLVLTQIDQKTGDELNTIIDKVQQQVSLESQFKEVKIIPISATRYLRGLEENKPIFCEKSGISTLFDEIEKIKNNVIKTREKEKFELINKIAHSLNEMELAINQEMNINKNKQVSLKSDITCELNKLITKVA
1	1848	GC_00000060	other	emors_3_2	81358	37	38.2											31.967	1.06e-06	WP_117586042	50S ribosome-binding GTPase [Prevotella copri]	MLTAFAQIKENIITSAPLINKYRDINEVKKELFDIIDNDTLQIMLYGAYNAGKSTLINVLLGEELAVVNDIPTTDKVDEFNWCGYKLLDTPGVNAPIEHEKTTNEQIKRSSVMLFVIREGDQDSKDLYIRLFEMLALGKKVFIVLNHQLTNDDDKAMAYKKIHSIVMSQAPKYGIEDKQIRELVVCPINLKTALNGRLNQHDKLLDHSGYTNFISLFEQWVKMNDAEQERLEHAISAVNTLWYMPTITELKQDGTDESNDALLNFRQDLAHLQARKKGLILESREMISHNVRLMKAQISQTLTQSTNQIELDTELEALISPLYKKVELWLEESLSHHYSTLSCDVQHTLKQASEDKNNPFFDSMLNQAKTFFSDEKTIKQGLLYGRKFKIPGLKGRWEK…
1	1864	GC_00000062	other	emors_3_2	81358	37	38.2											40.996	8.03e-51	AAC46428	unknown [Acinetobacter baylyi ADP1]	MVKNENVFVTSLRDFTGDFVLVNNREDELTKMQFEFESKIKKTLENSNGKLKKESLLFSLTDALKVSVLNGIKEWNEKLIDSLPMKKLSEEYSDRIILLVFGKVNAGKSSFCNFITEQFPNEEIKRFCFVDNRIEYFEQSFAEGVVETTATIQGVEIGRNFVLLDSPGLHSIVDENGDLTRRFTDSADAVLWLTPSSSPGQVQELTDLKLELEKKKPLLPIITRSDQLIEDWSDELNDLVHTIVNKSESIRQLQEVDVIERVKALGNVDDLKSAISISIHAYREHQEKENAQSQAGLNRLFSSLSDIIHEAKEYKVEKANQQLINFINDNVLSTLEKDISPQLLKLKDQTQKTLDDLKKKESLIISELLTTVKSQVRGVVEQHSASQDKVAISSGLNQL…
1	1918	GC_00000069	other	emors_3_2	81358	37	38.2	K01153	type I restriction enzyme, R subunit [EC:3.1.21.3]									70.289	0	AAA97247	CG Site No. 620; alternate gene names hs, hsp, hsr, rm; apparent frameshift in GenBank Accession Number X06545 [Escherichia coli str. K-12 substr. MG1655]	MQKSNFEFLKGVNDFLYAIARAAENNFPDDPNTTLVKVRIFGEATAKHLAKLLDIEAPDNQHELLRELGKIPFVDDSILTVFHKLRKIGNKAVHEYHNDLQDAEMCLRLAFRLAIWYYRLVTKQFDFAVPVFILPSSENKAQFEQEMHSLKQELVLVRQGEAQTKAEVAAQNAKLTALTGYISVLESKQEETQGQTQERIAALEAQLQRKDEEIAKKTEAERKAYKKQITDQAASRSLDLSESESRYLIDNQLRKAGWDADSKLLSFANGTRPQIGRNIAIAEWPTGKDETGKTGFADYVLFIGLKAIGVIEAKKANKDVVAKLSEAYRYSKYFDNDFLRNELQHAANDQTALDQIAELLPTYLPTWSDSSNSEPYKIPFCFSANGRAYRSAIKTKSGI…
1	1925	GC_00000070	other	emors_3_2	81358	37	38.2	K03427	type I restriction enzyme M protein [EC:2.1.1.72]									49.706	2.68e-162	WP_117017508	type I restriction-modification system subunit M [Aeribacillus pallidus]	MNNNDLVAKLWKLCDNLRDGGVSYQNYVNELASLLFLKMCEETGQEDDLLPEGFRWTDLKAKIGQEQHQFYRNMLVQLGADDHAIVRAIFQNVNTTITQPAQLTELVSNMDSLDWYSDEDGDKGKSRDDFGDMYEGLLQKNANETKSGAGQYFTPRSLISTIIEVMQPQPREIIQDPAAGTAGFLIEADKYIKSNTDNLFALPGEDQEFQMKKAFVGLELVPETRRLALMNCLLHDIEGDENEGAIRLGNTLGSAGENLPKADVILTNPPFGSASSTNITRTFVHPTGNKQLCFMQHIYDALEPGGRAAVVIPDNVLFEGGKGTEIRRDLMDKCNLHTILRLPTGIFYAAGVKTNVLFFQKGTPENPNQDKGCTKETWVFDMRTNMNTFGKRRPLTEKH…
1	1940	GC_00000072	other	emors_3_2	81358	37	38.2															MKPINYVIAFLFLFVQPSYAFEHSNANPGSAEFLIAACQEYTELYNKKDEQGFGTFFTTSKEESFRAGYCLGAVMHTNSKCSYPYTYTPSVYQAAKVIASVNVKQRYSETKLLEDAVCR
1	1946	GC_00000073	other	emors_3_2	81358	37	38.2															MIRSGNQYGCHFRFNNIKNKIRTLARVMQKNISTASKIWHGTKLFIKWFWLMTMFLLGVSLLLVMPLIMFEYSFSLSELDLIETLFIVFLVVFIYQYGKRCRQIDAPLVRKIITPWVHQAHIFLVFYSLTLISAPLLELNLRELERMPLLDLFGYILMAGTFGYSYYRIGLFAKKTVETVEVITTEGAVE
1	1952	GC_00000074	other	emors_3_2	81358	37	38.2	K15045	radical Sadenosyl methionine domaincontaining protein 2									40.418	3.06e-71	RGE41128	radical SAM protein [Comamonas testosteroni]	MNQANQLVINYHITEKCNYDCHYCYAKWAKPNELHRNVDDMKKVLSNLAEYFLSPNPIQKQLQYQSVRLNFAGGEPLLLKQRFIDALDYAIELGFEASIITNGHLITDQFIIEHSHKLQLLGISYDSYYAERQQQIGRVAPAGKVLSPERLQSIFKQIKRQSPTTELKINTVVNQYNTEEDFTDLITKIQPNKWKVLRVLPVFDSIEPIKDQQFDAFVERHESVAHFMSAENNDSMTNSYLMLSPDGAFFQNGNDELGYFKSRSLLTTPIDIALAETGFDAAKFAQRYQ
1	1958	GC_00000075	other	emors_3_2	81358	37	38.2															MSLVTTNQAVKDLFGIEGSEPLRSKANSYLRNGVIPSSLVIDDGFSDESMGKRGKKLLKSQAVHCLFNALVLDAFFNDTKFVKAIFEQSRTRVASVALCEEVLLKAQAVATVSHLSNLAQQFLSQLKDESFNLREYRLTCPFDDQRLPQMDMALQNTGLLYQLLRAQRLSLSHKEQIWLCWLEQDLAAASQLADQVDSALLETDMALKEMVKRAHKEYQEAQSFNALLSSLPD
1	1964	GC_00000076	other	emors_3_2	81358	37	38.2															MNQQQITVESGVKIKIITPKAPPLIINRAKKLISKIFVQDILRGMRPKVIQRNKKWLSYRVNRKYRLLVLRTRCNTGPYYCLSHTEFDHWVNNH
1	89	GC_00000001	flanking	emors_4_1	84748	37.2	38.1											47.917	1.71e-27	RGC81918	PTS fructose-like transporter subunit IIB [Hungatella hathewayi]	MKIVAVTACPTGIAHTYMAADVLKKAAAKLGVSIKVETQGAMGVENVLTPVDIVSADLVIIASDIEIEDKNRFLGINSKQFPIETILTDVEGILKKHLF
1	90	GC_00000001	flanking	emors_4_1	84748	37.2	38.1	K11203	fructoselike PTS system EIIC or EIIBC or EIIABC component									61.611	0	WP_117709256	PTS fructose transporter subunit EIIC [Fusobacterium mortiferum]	MDITSLINANVICLDLTSTSKEDILQEMVQILDDAGKLSNKTQFLADVWAREEIGNTGFEDGIAIPHAKSSAVLTPTVAIGISRTGIDYGAEDGEPSDIFFMLASTDGDDNQHIEALAQISSRLIEDGFTNKLKKADSKEEILDLFTDIIQPNTESTDIENTPPQTEKSKLTRKLGRTKEHLLFGTSHMIPFIVAGGVLLSLSVMISGQGAVPTEGILADIAQMGIAGLTLFTAVLGGYIAYSIADKPGLAPGMIGSWIAVQQYNTGFLGAIIIGFFAGFVVRSLKKIKLPESMTSLGSIFIYPLVGTFLTCAAVMWVIGAPISNAMAALNEWLASMAGSGKIALGAILGAMAAFDMGGPINKVATLFAQTQVNTQPWLMGGVGIAICTPPLGMALATF…
1	182	GC_00000002	flanking	emors_4_1	84748	37.2	38.1	K07001	NTE family protein									30.654	2.44e-99	WP_119143698	patatin-like phospholipase family protein [Pseudomonas reidholzensis]	MRHVFSLNLLFVFLATFLFTPYLYAEPIKEPSRPKIALVLAGGGAKGAAHIGVLKALEELNIPIDIITGTSMGAYVGGLYATGKSASEIEAYLHTVDWYSGYQDEVGREEKNIRDKKYEDRFAINPSLGIRKEGVKSPKSAIQGQNMLKILRETSGNPVSVASFDDFPIRYRSVATDIVSMEEVVIDHGLLVDAMMASMSVPGALPPYEFEDKLLIDGGVTNNMPVELAKEMGADIVIAVDISSNYMTKEQIGSLFDVASQLTNFMVKRSTQEQAEFLTDKDILLQPRVGDIETTDFSSMPRAYQEGYDTVMMLKSRLQSLAVTPNEYAQYSNKIKQQSANVRLAQGAIIDKVEVENRSHYESDKLERFIQFEQGTSLNSDYIEDKIHALYASNRFETI…
1	251	GC_00000003	flanking	emors_4_1	84748	37.2	38.1											30.208	9.24e-09	WP_116986099	phosphoenolpyruvate--protein phosphotransferase, partial [Escherichia coli]	MELNTIDYRITFFVKDQGLPPQVASQLTRLAKKFKSLVYIDNITQNRSTNAESSLGLLQVGLCPGDFCQLITVGMDAEWANFVLTDLLSSTFDFVASDKLCDFSETITNTYPQLTPQCEVDFHYVKAQAVLSKFEILKGLSQLIYPKESDELLLALIKREERSSTAMAKQIALPHVISSYVEKPTIAIIRSDYPVDWASKMGDVNVIIALVLPEKPTKEMIMAATYLTRSLLSEDFSQRLVHTRQPKGLQALILYAMCQLL
1	319	GC_00000004	flanking	emors_4_1	84748	37.2	38.1	K01809	mannose6phosphate isomerase [EC:5.3.1.8]	M00114	Pathway modules; Carbohydrate metabolism; Other carbohydrate metabolism	M00114	Ascorbate biosynthesis, plants, fructose6P > ascorbate					61.893	2.8e-173	WP_005478337	mannose-6-phosphate isomerase, class I [Vibrio parahaemolyticus]	MNALKPQTFYPMTNVIQDYAWGSHTSIEALFDIKNNTGKPQAELWMGAHPNGCSAVTVNGDSVLLSDLINQDKEAFLSKTTADAFGELPYLFKVLAAEKALSIQVHPNKQQAVDGFEKEEKTGIALTAFNRNYKDNNHKPELVYALTDYKAMNGFRDYQEIVSLFSAMQLPTIASYVDDFAQEPNSNGLQRFFKAILSLENENKERAVAELLDYASNSTDELFVLLQDLAIQYPNDVGLFAPLMLNVITLKPGEAMFLSACTPHAYIHGTGLEIMANSDNVLRAGLTPKYMDIDELMSCTEFVSQPLSSLLTQPNTVDGGMSYPIPVNDFKFSVFTATDALTLETNSAEILFAIDSDLTLTHENGDSVTVAKGHSVFVPAYAKRYSLTSSGNVARAYN
1	385	GC_00000005	conserved_T6SS	emors_4_1	84748	37.2	38.1											50	4.43e-11	P96156	Chitodextrinase; AltName: Full=Endo-chitodextinase; Flags: Precursor	MIKLNKITVAITSVMFSGYLYAADASAASNLVTFVPGETKVQNGDMVSFNGDCFVAKNNPGVWESPTADSWFWDAAECSGEPNPGPGPNPGPNPTPDPDLGDIIPFIPGKTQVENGDVVSYENQCFIAQNNPGVWETPSASSWFWALTECSDEPVNPEPEVTELSILAPIAGQVLTANEAISINAHVDGNLATKVEFWANNTKLAEKTVSQNNTQYSQTWTPSEEGNATINVFVFDKNNQKIEQKSVSVTVKAEVTEDFVAPVVKFVTPANGSTMNVAESLSISVNATDADNDLATLVVKANNKEICSFDAANTDTFACDWQPTQAGNVTLNAIATDAQDLSSTATVRITVEEDVVEPPVEPPVTPGDLCKDFNVYPDWTRGDHATGGDIMVHDNIAYS…
1	435	GC_00000006	conserved_T6SS	emors_4_1	84748	37.2	38.1	K11892	type VI secretion system protein ImpK									24.8	1.93e-08	WP_010910863	type VI secretion system protein TssL, long form [Mesorhizobium japonicum]	MSYVEDDVTVVLFQPEPGKPMEVMPAPDLSRNISVSELDISSMGINPLVDQFSWLIASLSCMSSIPWLDDPMPFREQVAREIRKGERMLNEMEVDRASILVIRYCLCAAMDESVCRQEWGANSNWSQNSLLSEFHNETSGGDKFFVILDRLKADPRKYRHVIEFLYLLLQLGFKGKYGRAERGAESLTEIGNTIYRLVRDERLAEQEKVALVDVKSKYLKKPLKRVLPPKLILGVSALLFAVMYAATYLVIDVRFQKLLSLYQ
1	474	GC_00000007	conserved_T6SS	emors_4_1	84748	37.2	38.1	K20276	large repetitive protein									41.849	3.72e-99	WP_011105819	hypothetical protein [Vibrio parahaemolyticus]	MCHVVIYLLINIMHAVLITTTRCYIFMRIFSFLKLFAGLGLILLISSCGGESKDTSPPKRETTSVSGILFDAPIAGARVVLWEYANGAIGKKLGETRTSSKGDYSMEVNSGSMPVLLQAFGGAYTDPATGEVVYEGDGKTLKFESTAYFYENKANRIMLTPLSLISKGLADYKIHKLGMDAKGAIDSANSTISNMYGFDVITVEPIDIVKGGQSAYVTAGHQYGAYLTAYSVFSSDLIKKYPASDSSSIYTSFTLSDIMYRDISADGQLDGYETDNISGLDKKISFGKESVSVETYTNILSQYILITVNNNRLNVSGTNPNDYKPFASKVNKLGTIPETMTVFPPRTEVPIDDTEPTVERSDKDVLVRLDSLDLLVKDNVGTKSLRVSLQYQDDLGWST…
1	513	GC_00000008	conserved_T6SS	emors_4_1	84748	37.2	38.1	K11906	type VI secretion system protein VasD									26.984	4.76e-15	WP_010910850	type VI secretion system lipoprotein TssJ [Mesorhizobium]	MRKLLTFSLIFLLSGCTMWDQFKESTGITPETSSIELIITADKVLNVREGGQSSPVILRIHELNSPVLFRNLDFFALFENDKDALGDEYIKRYEYQIQPGDVVHETLVLDPATRAIGFSVAFRDINGSSWRKVELIEEKSEYFLKLNLKESELSSNNTRGIEQIYF
1	551	GC_00000009	conserved_T6SS	emors_4_1	84748	37.2	38.1	K11893	type VI secretion system protein ImpJ									33.107	1.2e-83	WP_005463797	type VI secretion system baseplate subunit TssK [Vibrio parahaemolyticus]	MSLYNPVVWQDGMFMKPQHFQQLDRFQGKQSGMLSGFESPLHWGIKRIEINTELLALGKIGITHAEGILQDRTPFDLPLHASLPEVKDVDASVANKVLYLCCPLPSERSELFGTSKDGARYSIHTQDAVDACYDSEEIANITIGKLNFCLMYEDEDKSAYTSIPILKISEVKPDGSIILDNAYIPTCIDINASTVLKKFTTEFASMLRHRAESIVQRLGVVDQQGVSSVSDFMLLQALNRYEPLFWHFANIEGVHPEAFYRVLLQAEGELATLCSSSRRPQEFVPYNHGNLTSCLSTILHNSKVTLSVMSEQRAIPLPLKEQGYGIRIAPISDRSIVESTTFILAVKADVTLDILHTQFVSQTKIGSIDNIRELINLQLPGINIKPMPVVPRALPYHAG…
1	589	GC_00000010	conserved_T6SS	emors_4_1	84748	37.2	38.1											65	2.58e-96	WP_011105828	hypothetical protein [Vibrio parahaemolyticus]	MAKPIQLGFMALIMACSLPVFAKGERYGIAANFKTIESTEYEQGMSGELSTISYGLVHTRPIDENNNRWRWLFGFNYLSDYIEAPANGVYQEVTNYEFRIVPQYALGNWWAFTPYVGAGLSLGYSQYGNRWKVDDEGYKYGNQLDDIDQFEVGAILSFGTVIKLGSNPDAHLQIIPQASYIQPIYNDGLGGLELSVSLLF
1	627	GC_00000011	conserved_T6SS	emors_4_1	84748	37.2	38.1											39.13	0.00043	WP_117539334	FHA domain-containing protein [Coprococcus catus]	MHLNQLTLFITKSPEEYTGNKHIEMPESGGSLGRNPSNTVSLVDHNRFISGSHCLISIYGDTYYLSDVSTNGTLVNGNKLLKNQPISLYDGDTIVLGRYEISVGLEKLSNSVNIAADISEETDSTDPLVNLAEYTPDEEKDKGNIADLFKETRIDKVDSSDPVAHLNFITQTNNDDHLLHGNEKKQEQKIKEPIHTRQLLDDSDSVHSEFDVPNLIPEDWFSNDFTDTSIPPVQVNEPIATHSEPESMMHSFIDSTPETIISSASEISSVTEQLAWEDVTQTIQPSVSTTEPKSDEFFIAPSTSMDVYPSQSIETSFNSKMSDDAASAFYKGLGMSASQIEQTDEQFFQQMGNCLRLCINNLQKELSELKAIKNNEQDDSMTNIVELMLSLNHQQLLSP…
1	664	GC_00000012	conserved_T6SS	emors_4_1	84748	37.2	38.1											30.882	1.68e-20	WP_116949140	Lrp/AsnC family transcriptional regulator [Jiangella endophytica]	MSNMNLQGLDKLDRRIISNLLSNGRESIANLSRNVGLSRTAVAERINRLEKTGIIKGYTAQIRMGNKDENASSYLLISCNKGQKDSVSDGLKEIPEVKMTSIVGGTYDIICLIEAPDLHRIHYLCSEIESLSGIKEVKNTIVLHQPVCR
1	700	GC_00000013	conserved_T6SS	emors_4_1	84748	37.2	38.1	K11901	type VI secretion system protein ImpB									40	2.67e-32	WP_117580760	type VI secretion system contractile sheath small subunit [Enterobacter]	MSRDGSVAPKERINIRYVPATGDVQEDVELPLSMMVVGDFTARTDETPIEDRTPINIDKDNFNDVMEGYSPNVKVNVDNKLSDEEGAQLGVDLTFNSMKDFSPEAIAKSVPELNGLLELREALVALKGPLGNVPAFRKKIAAVLQDEEARQKLLEELNIGSAKEEAKAE
1	736	GC_00000014	conserved_T6SS	emors_4_1	84748	37.2	38.1	K11905	type VI secretion system protein													MEKGYRLLERIELGEPKNCYEKVVSHKHLIESIHLHLADLLNTHAGNAMIDNDYGLPDFNDVLSNNTNLVRNIQQNIKVSIEKFEPRMRNVEVHYRHDNNNPLQLGFGIGGEVIHNGGKVPMAINIFMGVDGQFNV
1	772	GC_00000015	conserved_T6SS	emors_4_1	84748	37.2	38.1	K11900	type VI secretion system protein ImpC									60.288	0	WP_117611541	type VI secretion system contractile sheath large subunit [Escherichia coli]	MTAEAQAPEQEAALVESGSLLDSILNETRLKPSDEGFDVAKRGVEAFIGELLSTNTSDKVDQSLVDLMISEIDQKLSKQVDAILHNEEVQAIESTWRGLKYLVDHTDFRENIQIELISAKKDEVLDDFEDAPEVVKSGLYKQIYTREYGQFGGKPVGAVICDFQMSASSPDIKLMEYMANVGAMSHAPFITSASAKFFGLDSYEELPNLKDLKSVFEGPQYTKWRGFREHEDARYVGLCTSRMMLRTPYSVEDNPIKAFDYNEHVKDGHDNYLWGNSAYAMASKISESFAKYRWCPNIIGPQSGGTVSDLPVYNYESMGQIETKIPTEILISDRREYELAEEGFIALTMRKGSDNAAFFSANSVQKAKVFPNTPEGQQAEMNYKLGIQLPYMFIINRLA…
1	808	GC_00000016	conserved_T6SS	emors_4_1	84748	37.2	38.1	K11903	type VI secretion system secreted protein Hcp									51.744	8.35e-65	WP_137712216	Hcp family type VI secretion system effector [Brenneria rubrifaciens]	MPTPAYMSIKGETQGDITKDAYSADSVGNVWQEAHVDEFLVQELDHVLTVPRDPQSGQPTGQRVHRPVVVTKQQDRCSPLLFNALVSGEKLPECSINFYRTSTSGKQEHYYTIKLIDALLVDMQTRMAHCQDAAMADRVTEEVLKFTYRAIEVTHETCGTAGNDDWRAPREA
1	844	GC_00000017	conserved_T6SS	emors_4_1	84748	37.2	38.1											45.455	1.22e-07	WP_117031792	DUF2169 domain-containing protein, partial [Klebsiella pneumoniae]	MQLWDIDSESPFTLKGRFQRDSEGHEVWVLSMKRAWTFLDGSWSEEVDNLELNDDPIYLDEPGFSAMVADHDFPIYKKNTDVLIYGKARSYAKKPVHSQLCRVLIDEHIDKTLKVVGERHWVDHSGSITVSTTQSFIERDIDYSNAIGGDERNRIGGGAAETNTELLKAKVPSIFYPDQNWQASSKKVKVAGFGPMPPFFHDRAKWAGTFDEKWFEERRPVWPIDFDARFYQSAPQDQQCNGYLQGGERLMVSGFCHNDALSFRIPSEKFQAVAVFNGKEEKINMPMYTLWIDTENKRIEATYTAAFPCQNREHLLTSSYLVELS
1	880	GC_00000018	conserved_T6SS	emors_4_1	84748	37.2	38.1	K11895	type VI secretion system protein ImpH									32.523	4.84e-54	WP_000348794	type VI secretion system baseplate subunit TssG [Escherichia coli]	MIQYIVNKPCDYSFFQAVSLLEKHYQNLSGIEYKAIGENQYVKNEYIQFSVSPKLSFPKSDIEFITEFERNDATYTQIEVNFMGLHGVSSPLPASYTEKLAGRDPDDNPVKEFFDFFHHRYISMLYRVWKKYRYHIQYKSDAKDPFSGRLLHLVGLSSVIQESNDVDLDRAKLLSYVNQLSTRTRSPKLVSGIVSHYFSLSNVYIEEWVYRRITIAVSQRNCLNRKNCQLGGDLHLGQSMADLTGKFNLCIDDIDFDTYVKFLPGGALHETLIGLMKFILCDPMAWDLKLTVRNKSLPINQLGDGLGNELGQTFWLGTTKGEETKIKIVGSN
1	916	GC_00000019	conserved_T6SS	emors_4_1	84748	37.2	38.1	K11914	sigma54 dependent transcriptional regulator									41.463	2.41e-77	WP_126397535	sigma 54-interacting transcriptional regulator [Blastochloris tepida]	MSLAKSDNLNNALLAISQSLADRSQLALTLDAILAAARQLTFADHGIIYVLDQTGQALLPSVVHHNEHILAEHPWQPLTLESIDETDPFSFAIQNGEVVLINDLYQYNGYQCDEIYQNESILNCQSKNLLAWPLIDNEKNTVGLLVLFDLNVINDEASLTCFCQMAATNIRQAVWLEKYGYMIKELSEDNASLTRENNQLKQRKQSQYSGPIAESEVMLNALARLDKVLSLPVDVLIRGETGVGKEVIAKYIHENSNRSKQALIVQNCAAIPEQLLESELFGHKKGAFTGADKDKIGLFEAADGGTLFLDEIGDMPLLLQAKLLRVLQERKFRPIGGNKEISVDVRVLAATHANLMEKIKKNEFRADLFYRLNVFPITIPPLRERTEDIIPLSEHFIKL…
1	952	GC_00000020	conserved_T6SS	emors_4_1	84748	37.2	38.1															MKPYLLLLPAALVVAGCSNQTSVPDPLAPYKNVHIIGNKKQSIGSFNYLSKDVDGYTDKQVIVYFNEIPFTSTFNLCADKGVYIANCKSTVSIFPSKNKGVIFNYDLNFYNGSYPARVGSMNILLPSTTTRKMDNLTQYTSAKFSEEQFLESETLEEATFILMKSS
1	988	GC_00000021	conserved_T6SS	emors_4_1	84748	37.2	38.1	K11891	type VI secretion system protein ImpL									23.353	1.16e-68	AFJ27267	IcmF-like protein [Escherichia coli Xuzhou21]	MIKNTLARTPFILSTVISAFFALLLVGVYYLWFNQADLRLLWGMLGVIFSIYAIFNLTLYIKKRKNKSHQNIETEEDTLSMVLKPLLHKAGKKPVYLVLGNKGAGKNQFLNVSNAIKPMDKVKNVKNDFFEWSESDSAVYIKPNHRLTFQEISSNDSLLWDALINEVIKHKPRKPFSGCMLLIDFEFLIVHDDEQTDYTLNALLQRLESIKETTGATLPLYLIMTKLDKLEGFKEYIHFSPLKSSVEFLTIPLKDAKGAILDYFRDSYKNIVKVMESNALDSSSYTNNPDEKQTILAFPKQFELCEKEISRIIERLNELNQGTYSVDIREVFFSSSLQGGRKYNLLAKSCSNYFNLPIIASEHGQLTETPYFTRFLVDAKVLPESDYSAENQHYLKRIQ…
1	1024	GC_00000022	conserved_T6SS	emors_4_1	84748	37.2	38.1	K11896	type VI secretion system protein ImpG									32.414	1.34e-91	WP_117681754	type VI secretion system baseplate subunit TssF [Klebsiella pneumoniae]	MSNSKYFQDELTYLKEAGSEFAKYHPKLTHFLSEGTFDPDVERLLEGFAFLTGRVREKIDDELPELTQSLISLLWPHYMRSVPSMCISELVPHSGSVTEKIIVERGAEMASEQVEGTQCQFRTCYDVALYPLSIQQIEQNNSRTNSSLHLTIAANNGLELSRIKLDTLRFHLHGEQHITRSLYLWLFRYLEYVELDVGGGYKHRLRADQVVPVGFGDDEGILPYSKNSFSGYRLLQEYFSLPDKFMFFDLKGLEWLSGIPQRSTVKISFAFSRALPSEVIVKNKHFKLHCTPSVNLFEKDGDPIRLDHQLNEYKVRPQSSNQEHYEVYSVESVESWSKTERCRKKLIEFESFEHQINQKDKRDFYKTKVNERINGRGLERYISFHSHNNQVSELGSETV…
1	1060	GC_00000023	conserved_T6SS	emors_4_1	84748	37.2	38.1	K11910	type VI secretion system protein VasJ									23.866	5.34e-25	WP_119144555	type VI secretion system protein TssA [Pseudomonas reidholzensis]	MTSLNFESLLKPISEVAPTGEESKYEFCYELMELEIKKFGSLFGETVDWKVVETNAIEVLTTYSKDLKAICYLVRALIERNGFIGLDEGLNLLKQNLVLFGTDLFPQRKRARDGAMEWFVAQLETTLPKLDTSTTNWESVASYLQRINEISEQYHEAFSDSDVEFYLITSVLNGISQRVVGAAETNTDTSRNTVCEPEPLVEETTSTVTEVKTPVQAVTQVSRTVNTVKQEVDIDTDFTSPSASKRTLKKVAEFMLHSDISTPLAYRLHRNCTWCEVDELPPHDNDKKTPLSLAVSQDQLSEYRDKAKQETEAEVIKRLERTLTDAPFWLTGHYLMFQMLTNLDHNEAAEAVKQETQHFISQLEGIELLTFANSTPFADEETLKWLSLNTTSTPVAVAA…
1	1096	GC_00000024	conserved_T6SS	emors_4_1	84748	37.2	38.1	K11907	type VI secretion system protein VasG									45.285	0	WP_117580830	type VI secretion system ATPase TssH [Enterobacter]	MININLSSLIQRLHPITKVALEDAAALAVSERASEVQIEHFLLSLLERPNSDFDQLLAHFECSENLLRQAIKSTQENSHKSNGGKPVFSAMLIEWLQEAWLVSSLDLSETQIRSGALLLTLISNPLRYGQHGYSSLLENINPETLKRNFAELTSRSIESQVATSEQTHAREDGSALSKFTTDFTGKARKGEIDPVFCRDQEIRQIIDILARRRKNNPIAVGEPGVGKTAVVEGLALKIVQGEVPDCLKGVELYGLDMGLLQAGASVKGEFEKRLNAVLDEVKNSPIPIIIFIDEAHTLVGGGNQAGGSDAANLLKPALARGEVKTIAATTWSEYKKYFEKDPALARRFQLVKLDEPSTEQAALIIRGLRAVYEKSHNVYVRDDAITAAATLSDRYISGR…
1	1132	GC_00000025	conserved_T6SS	emors_4_1	84748	37.2	38.1	K11904	type VI secretion system secreted protein VgrG									35.458	1.16e-117	WP_002213876	type VI secretion system tip protein VgrG [Yersinia pestis]	MVSDIEFKFEVLGTEHEFRVESFNVVEELSKPFHVSLSLLSLDADITFDELIRKPALLSIFGQGIGTARQFHGVVNEVRYLGEGRRFSRYQITLVPQLWFLTQRQDCRIFQEKSVVDIVTEVLDGAAVTDYRFDISALYPTKEYVLQYRESDSHFVQRLLAEHGLWYYFEHTTANHTMVIVDKNDAIAELENTPLNSSYVGPVIYQADGGGNADREHIFDLESINRVRTGHVTHTDYNYEQPRIPQKMESSGLIDTDLAFFDYPGRYAEPSQGLVRADELMAESVVDNYQIEAASNVMRLIPGYSFILDKHPRRALNRDYTILTVTHSGYDPQVHEDEANEMPTTYQNQFSCLPRDIEFKAPKIAAPVVDGPQTAVVVGPAGEEIYTDKLGRIKVQFHW…
1	1168	GC_00000026	conserved_T6SS	emors_4_1	84748	37.2	38.1															MVRLQLTNSIEVTGAIDENSQAESLACVPRFGKVISLHPTMPDRIYVEFDGLATGRTALAKIGRLFRKSELEFAIESGLTCRIEFLNGDITLPVLTDIFFSLLADDQPVILRAKSLIIEAENELIVRSGATQTKYSGRDGRVTTQAKYITSQAEKAQKIQGSTIAVN
1	1204	GC_00000027	conserved_T6SS	emors_4_1	84748	37.2	38.1	K11911	type VI secretion system protein VasL									45.057	2.4e-123	WP_011105827	type VI secretion system ImpA family N-terminal domain-containing protein [Vibrio parahaemolyticus]	MLGLNFNMNLSDFARRPISIEMPSGINPNSLDNFSEIKREVNKLNTVTSKISWKHVFKLSKSILESESKDIRCACYYTVSATHIDGLKGLVNGLNALLDICVIYWHSGYPDVNKTTARMGAFEWLTEHAIKKQKTLKVSPTDLVLIETGHKLTLKIEEELRSHYGNKSPSLGAIRRIFSQWIEEIQTTKLSLEEQRLKKEAIEKQNNSGINVNVSLPPRDESKKTVQPTMTHTEKDKNIKPMVTISLAFIFILTLLFGHFLYADNQKSTLLINIQKADLTTINPLISQLENKEDDLKQYVKIALIKQALHLNKDWEVTSTKVDKINELETLNHSLKNLYPDSAAVKKLEYEFNQQRADFENEYSDIHRRFLKSRTIFANAKNHNSDENIVKAYSYSNSL…
1	1240	GC_00000028	conserved_T6SS	emors_4_1	84748	37.2	38.1															MSIYQHQYILDSDIVVPTGMNTELAIAIARADIDRFATYEDGNEKYTIASLEFVDQTCLMTKVQETLNVLITPLLDRLHISLKPLPLLLSVPHEISEHDLRNWIDESDFSDYLSNIKFSKNSGNAFLQECLNSLAEPDAIMCIAIDSLYEKKEALMSSRDAMSGTNPWGVLASEGGAGMVLTKRNVLDTLKLIPQSKIVYSQFDWHSSDRRGCARLIRAASKHHDNLGPIYSDMTNQRAHTEDYGFAIGARSEVIPYAQQVTLTNEFWGTIGGGSGIATLATMNHLSTVGVLSTAFLFDQNNTRSLFILNREK
1	1276	GC_00000029	conserved_T6SS	emors_4_1	84748	37.2	38.1											30.366	7.59e-17	WP_138184353	serine/threonine protein kinase [Paenibacillus alvei]	MSELQGSTNDFINQLVVKAIEKKKKNEQTLANKLKPRLEHVLFSQFDVLETIESHNQKTTLYRLAKKDEPEKQICCKVLNSEQPEHVLEMFVAEATHLEVSQHPSIIDFIKLGNEFERPYFMYKWAEGESVAEKLTRHKYKSFRHDHIAWLIYQLAGALEYIHTKGICHLDIKPSNIIICEDDSIKLIDFGAAQYINDSRKYNEASLSYASPKYIESGKAVPQDDVYSMALLVCALFTGYSDNNDWKALLQQRKRPHTIPKTVWNLLRLVVTKPRTHGLTPISFAQALAHIDISVMQGSHNAPLFTQLRNADLVLRKSSKYDVFRLGRFKYLEASLAACLCLITFTVLLKSFAFTVADSNAVSLSDTSSRIKPAQAATFLSQSPWEIENALDNNSSDVV…
1	1312	GC_00000030	conserved_T6SS	emors_4_1	84748	37.2	38.1															MNRYRYLVDDVKKTLTDADKQQAIADIALAQEQLSSFSENMVNFLYTKAILAAETASFYIKQQYRFHQNGYPAKEIDYLTLLETQLSEIEKVFIALLRIHRGFVYVVYSEYPEVLAWLCLSKNIESQHENDELALLGIGIIDQLDPELAMSLILRSNSNHIHKLLARFIEGGASKRELYYRCLVINQSVSVSLIKHWLEDKKLPEKMLHSYLALMNVGSSIEWLQELTNADDLLFENLILKEDRSTWFRQQYSVDTISSETANTYSKLLTLKEFSLFDIEKEQAVIHFILSGDTELVPLIIDHLMQLDEVDAQLWCEGLFLVYGEEFPFLPSKLGNTIEWQDALHEIVEWQEQIEVVKPVPLRMGQKLTFDSSIRAMKSSELSSSLREWLWRELCIMSR…
1	1348	GC_00000031	conserved_T6SS	emors_4_1	84748	37.2	38.1	K19304	murein DDendopeptidase [EC:3.4.24.]									34.081	8.07e-41	WP_116986330	murein DD-endopeptidase MepM, partial [Escherichia coli]	MPSFSGEDQKMKLKYLTFISINLTFIILSISLLYFSSNHSDVTNGSKISTSSQNNVSDKEKQKPDNLVINGTINDSFFSSALNAGLTSKQIFSFTEALHNSVNFIDGIEDGTPYSIVLDKDTSHIRSFFYTENNRLHTIQLANNGSYYNELGVNLSSNKLILPTGNLFRISSHFSKERKHPIVGIVQAHVGTDYATPIGTPIMSVSKGIVSRSEYHPLAGNFISIKHNNGITTRYLHLNDRYVNKGDHVYKGEMIGKTGNSGRTTGPHLHFEYIVNNVPQDFTKLYNNIEMPLNNKNQKKLLKCINLSKTLITKILKEA
1	1382	GC_00000032	other	emors_4_1	84748	37.2	38.1															MKKILLLALLSITLMGCNDPESAAAEAAQLRAEQHPERTYVGEHNYYIMESSEHAEFGRKKDLKVMYQDFPRYFVEKAKEWPKEDLNDASSYDLPRFQFAWANSSSKDEYESGIKIWSMKTDGTDLRLVTDVTVELVNGIKNLTRSPNNRYVAWADLGGYKTVYDIKTGKVVELSIAMSPLSMLWSEDSRYLYFERARDLFSRWDSETGEVNKVDFDVRTTAVNFDGKRTTILDFGVLVVDANTNEEINWIGVDRSLSMDERSLDISSIDPEGHYAWGSNTSFGFFFDIEKGTVKQMVDDFVPAQILGKNAHYSALSKMTYVTIVDRVEDKVWSWRAFSHGAMSGEGILYNGLANNGLWFKEGK
1	1383	GC_00000032	other	emors_4_1	84748	37.2	38.1															MSTLKKILLLALFSITLMGCNDPESAAAEASQLRAEQHPDRTYVGEHNYYIMESSGDIEFANKKDLKVMYQDFPRYFVEKAKEWPKEDLNDASSYDLPRFQFAWANSSSKDEYESGLKIWSMKTDGTDLRLVTDATIGFAAIRTLTRSPNNRYVAWAGTGGQKGVYDLKTGKVSDMHKFTSPLDMFWSEDSRYLYFDDAINSYARWDSETGEISEVNFQIRTTTANFNGKRMTVLDFGVLVVDANSNEEINWIGVDRSLSMDERSLDVTSIDPEGRYAWGSNPSFGFFFDIEKGTVKQMTTDYTPAQILGKDAHFSALNSFAKVRIVDRVGDRVWSWRAFYYGALSGDAILYNGLANNGLWFKEGK
1	1417	GC_00000033	other	emors_4_1	84748	37.2	38.1							EFF01293	41.768	3.31e-154	NA					MHFNCKLIPSSSLSHKELEYILTPDEFVRLLSRGKNSQSIINQLPVQLRQSLSISASKSVQSLLFSLNQKLIKAEWIAVSTTVRKTGVSDTQLAQYPQLKKQIDRVETTQPAKFVKANFKPVTDDVPLVRNLSFTPVEPSPEHKISIEFAGQWPNNAASLLLAKSGEQKEKIAKPRADIHASHRSIATFKDLEPELRNLYLTIPMNGTPQPLKLLLAENIQPVDKETEMDEWDTVLVPVVPMKKLGEEYSLHQTGYFYVIWNGKVWREITIDSNGYFCDLDIQHERQEPLSTRHVNINASEFFPEANMSFEKFELYQEGQKVFSGELDVCEQSRVFNLVAEEVELKFVDFEHDEILLTTFESPIKNNASNERQAMSYPMPHVWLPYKLLGEVQADCYVY…
1	1450	GC_00000034	other	emors_4_1	84748	37.2	38.1											32.11	2.46e-06	WP_005483532	OmpA family protein [Vibrio]	MTALKTYDHGVYLLGSYFDLHDNGRTKEFRTWHQSSDLTEANDLRNVRPIPFTPVLVYDTENPVLWGADKDGLLCQLGYFYEDAVPETVARKQTFLRHKAPLTVNELSESESYPLTFPPLNVIGQLAEKHTSVKSLNDALTDIYSNKLKLKNKKPIEFTISKIKVSQLAEPYKKPLTDEQNDYNAWYDKIKASKVTKIQGIITPVFHSIGVVFSSDLYVGAEVSLIQVKSKQDNSGEVEKVLATSFVIKPDPSDDKTNNPEDYKKITPSVVFNFDPTLIDDGYFLLRTRFWVEEYLDKQKEILEEGIDATFPDSVKQGQLKFEAKVKHPESETIQDVYTYELHEKVTFKPISGFGKLAMVCGDLISLEECLIYQYPTALPSYSDFMTQQGNTVALKGTG…
1	1481	GC_00000035	other	emors_4_1	84748	37.2	38.1															MAIQFTSIVESGRFKDRKFARLVLNTIILIIVLMVMTLEILDDYDILDIFNDIQDNIIAFTTLCYMSALYSYGYQLPLFKHQWQVFLILYLTLAQAVYVLGYLTYTQYDQHSIIYLLSYCLFWSLFYGYLIYTINNLKNDIK
1	1511	GC_00000036	other	emors_4_1	84748	37.2	38.1															MNNEYHILSKSIFSQFPFQQTPKPIVPVEPDLLLEMTFSPKLFIINDIAEKVENLVQHGVEWLDARIDCSPSQPSDEQIKVFENFRMPYIHQTYRLTNEEKQYGKLNWLDFNSVDLDFSRLNNIPLEERLIFKLEEDFGYVFIHESVIELLKKHVKDVWVRDV
1	1537	GC_00000037	other	emors_4_1	84748	37.2	38.1															MCKQTNYSKYQKRVIKFLNDLLGADTPFTYERANNNHLKVLIDGVTKPLFTGSTPSDCKSINNFMAEVKRELKASKKEESKLSQPEKTGVVSAVTLSNDKLIQNCVKSLRTRITVLKEQEKESVLNNKCINGLNLKRIEIVKHSVSLALQARKQGTYLKPKELRTIEGMVHNHLNFMLPSMAYYAELLNSTSKDKLAKVQPNKQQASVHNESNKNNVISLEDKTQHAPIKEAKKLAKKPKQPVSNKNMNTKNSNSATELMAMSANNRVSLLRNLTKAQALMLIDDINQAMAANREEDIEAVIALIRDKDLPLDAIISRMEAA
1	1563	GC_00000038	other	emors_4_1	84748	37.2	38.1	K19135	CRISPRassociated protein Csx14									30.132	2.4e-20	WP_116935424	CRISPR-associated ring nuclease Csm6 [Verrucomicrobia bacterium]	MKNILIAVTGASPQVLTETIYALHTQGKPMPEVVYVITTEDSKQTLKEGLFVQGYWDKLMTDYQLPPIAFNSDHIWVITDDNGNALVDAKGVDDQSIMADFITRKVALLTQDNEVAIHASIAGGRKTMAFYMGYAMSLYGREQDVLSHVFVDDEFEFVSDFYYPTPVDCFIQGKQGEAINAKEATVTLAEIPFVRMRRQVDECIINQMETHSFSKTVSALNSANNTQVRVSISTKEKTVEVAGVKIPLTSKHLAIYLFFLSKDNRKATLDRYFEDDKTQTTDYLCVLDKMKADVRLYKTMGLEDEGQWRQKDHAELATLTKDFVRQSLNGLHKSLKDKLVPDLFEKIKVHSDGVKSGATYQISTEVLFICDEVEL
1	1589	GC_00000039	other	emors_4_1	84748	37.2	38.1							EFF01536	48.849	1.28e-107	Toxin PAAR-like domain	45.361	1.19e-18	WP_119719572	hypothetical protein [Klebsiella pneumoniae]	MGVTVAANGLSVVHQGSGGEANATLPDVCLTKVGKPIVPIPYGNNAKSADLAKGTTTITMDGGNPVAIKGSTFSKSTGDAGGDKKGVASGTIEAEAEFISASPTVKFEGKGVCRLSDQMTMNKANTMCLGGAQNPSVSLTLEEEGTYTVDLFLSYSDGDPVQGATYKLVDQTGVIFEGNLDTKGKASISGIAPGEFDIEYGEDSREFTPNIPTKENPNYNPNASAQMLIDETKRGEIGFWESSWRKTAGAASWIWGVILGDFNDDATVEQIIANTAITMLPVVDQAADVRDMVANTMTLLNEEERDKPENWLALSLTLIGCIPVFGSAVKGTCKVALKSGKATSKDDLLAIMRAMGKGDPEKFLRTLDWADYAKQTSQIISDVLQPCIEVATELASYAN…
1	1615	GC_00000040	other	emors_4_1	84748	37.2	38.1															MYFSLITENYFTSRVNFTCVDNREFFYSTNFYHPTTSNHSIVWKDIEDGKVSQVGPIVDIGDLSVSNQFAQKIMSFDPYGVEVYPSKLELKDGQIENRYLLAINNIIDVLDYEKSDIEISPRSGKQIIHILFLSEKKLKKIPLEQRIAFRVKGAETAMFFCEEFFQTIDSESIFNDLRKEKIHINSRAPKF
1	1631	GC_00000041	other	emors_4_1	84748	37.2	38.1	K03427	type I restriction enzyme M protein [EC:2.1.1.72]									52.975	0	WP_117002891	type I restriction-modification system subunit M [Cysteiniphilum]	MLTGQLRNNIDTLWEKFWTGGVTNPLVVIEQISYLMFSRMLDMQETTSERKAKRTGQAFTRQFPETPEGQLLRWQNFKNMSGKELLPHLRNKVFPHFSEIELNGSDIAQFMADADVEIRSESVLLSAVEMVDQLPLDQSDVKGDIYEYLLSKLASAGINGQFRTPRHIIDMMVEMLDVQPTDVICDPACGTAGFLSRTMEYLTRTHTSPDSIYQDEDGNDVYTGDLLHEYQDHINNKMFWGFDFDSTMLRVSAMNMLLHGVSSANITYQDSLNKNFAELPQEENFFDKILANPPFKGSLDEQSVNPNVLATVKTKKTELLFLALILRMLKLGGRSATVVPDGVLFGSSKAHQDLRKELINNNQLEAMISLPSGVFKPYAGVSTGILIFTKGGSTDNVLF…
1	1648	GC_00000042	other	emors_4_1	84748	37.2	38.1	K01153	type I restriction enzyme, R subunit [EC:3.1.21.3]									33.133	1.18e-178	WP_117002890	DEAD/DEAH box helicase family protein [Cysteiniphilum]	MTTSLNFELIREHNDKLTKLGSLAEQILHLDPGSAITRLRGFAEEVTKEIYAIESLPRLPQANFIELLKNDAFIDATETRLRDQLHFLRIEGNETAHGGDGSIKKAYAALGTAHSLSQYLAINYYGFQVADLTDLVYPEKPSSSALNQKQLEKVIEENQKQQDLLLQELERERQKRIELENKEQATAEQLSQAKSRSEQTANSLEWDENKTRQLLIDSQLAQAGWDINNPDSVGIEVKVLHQPTKSGTGYIDYVLWDDDGTPLAVVEAKRSREHIQKGREQARYYAEGLAKEHNCAVPIVFYTNGYEICIWDTKQYNTYRQIFGFYSKDSLKFLQFQYQHKEPNLELLNPSSDIAGRPYQIEAIKSVTSQLQNQRRKALIVQATGTGKTRVSIALVERL…
1	1663	GC_00000043	other	emors_4_1	84748	37.2	38.1	K19147	5methylcytosinespecific restriction enzyme subunit McrC									39.118	2.14e-73	WP_117455722	McrC family protein [unclassified Firmicutes sensu stricto]	MKAKKEITLFEFGFVAKDGRAEAHSRVQKVSASSYDYLKRMCLGDESDRKLLKLRSLDGMEVLQVQNYAGVIFTSDKTQIEVLPKIGKSTNEEEGEEQARVSLLTMLRALKGFSHIQTASANITHQKMPLLEVFIGQFLHSVNTLVKRGLRSDYVRREDNLAYLKGKLNVGKQLRHNFINKHKFYCEYDEFLLDRPANRLIHSALLNVKSLARSAANQKLAQELVFVFHEVPKSHDHKSDFLKVKSGRGMNHYDVPLQWCQLILNGYSPQTMKGDHHAISLLFPMEKVFEDYVAKIIKAELAQSHPTLQLETQATGEHLARYQQKGKFSLRPDLLIKHDKRNVAVLDTKWKLLDSKISNANLSQSDIYQMFAYAKKYLKRNADEQHGNDVVLIYPMQAN…
1	1693	GC_00000045	other	emors_4_1	84748	37.2	38.1	K06946	uncharacterized protein									46.903	6.85e-95	WP_010981048	GTPase family protein [Neisseria meningitidis]	MKENNIFKDMENDVNASNLDEHTKQKFFSNILHLKNKKINLMITGATGCGKSSTINAMFNTDVAKVGMGVDPETMDIRKYELDNLILWDSPGLGDGKEKDIQHSKGIISKLNELDENGLPLIDLVLVILDGGSRDLGTSYELINSVIIPNLGENPKDRILIAINQADVVMKGRYWDFQNNKPEPKLVSFLEEKVESVKNRVKEATGVDIKPIYYSAGFKDEGEEQRPYNLSKLLYFIVKNTPLDKRLVYVNTTSDDKNMWSDNDEIKNYTAEIQKSFVETIVETSKVGGKIGKELGDILGMGKTGEAIGKVTGAVVGAFKSVVSSIFSWF
1	1694	GC_00000045	other	emors_4_1	84748	37.2	38.1	K06946	uncharacterized protein									42.857	1.91e-60	WP_010981048	GTPase family protein [Neisseria meningitidis]	MFKNYRKHDLNNNIKIMDVTPLDIMITGVTGAGKSTTINSIFNKSLAEVGRGVEPETMGLNSYTLNDCLRLWDTPGLGDGIKQDQIHSKKIIDLLYKTYSLDSNNYGFIDMVLIIIEGSNRDMGTNYKLINEVIVPNIQRERVLVAINQADMAMKGRHWDSLNNKPKERLKEFLDAQVISIQSRVKEATGVDIIKPVYYSAENNYNVDALLDLLIDNMPKNRRTIG
1	1721	GC_00000047	other	emors_4_1	84748	37.2	38.1	K07452	5methylcytosinespecific restriction enzyme B [EC:3.1.21.]									41.856	2.07e-114	WP_117455719	AAA family ATPase [unclassified Firmicutes sensu stricto]	MARDNTKYRFEESVYGKGRLVHAVVATYIERYDATLAQLEQIFPGSLQNKNGNVFITQQEYDERLSKSSDVENRFYNKAEDRLLTHDGITIYVSNQWGVGNIEAFYQQAINQGFAIEKILSSSQATLEPFFTASNENTMSPLNQILYGPPGTGKTYHTIETAVKAAEPTFTWTTRDELKAEYTRLVADKRIRFVTFHQSYGYEEFVEGLSATTNEEGHLTYPIRDGIFKSIVEDAKSDSYRKAFEVNQDARIWKISIDGTGKSDISEYCLQNGIAAIGWGESGDLLSEKLEENEYYQSLGPQVKSSLSEFAQRAAIGDLVLCIGSQRTVQAIGVISGEYKFEPAGTSYFSYYCNQLPVNWLVTDVNIDFHELNGSVNFTQKTFYELWRFSVADVFNLLE…
1	1737	GC_00000048	other	emors_4_1	84748	37.2	38.1															MKMTDTKKHAIKRLILNNHWEFETRTISKNGKQEIGAYSGNRTRIISLEG
1	2093	GC_00000107	other	emors_4_1	84748	37.2	38.1	K01144	exodeoxyribonuclease V [EC:3.1.11.5]									39.854	0	WP_119063984	AAA family ATPase [Acinetobacter sp. SWAC57]	MNNNFALLQSRWPQLAEFAQYAELYVFSDPQSSLIKLRCYCESMVGLLYRELELKCEVNSSLHDKLKASVFTNVVNTDVCNKLHALRMKGNRAVHHNEASSENAVWLIKEAYLLGQWFYKTLTGDYSNAYPDFQPPICSTTSASTDTYTLEQRAERLKEELRAVEASEKKALEDLSRLQTALNEAKSTAFRNSSDAATQTIDFDSKTTLQNMSIHDAFAEYNLTEGQSELVKELDEFLSNKSQKVFQLKGYAGTGKTFITKGITEFLKSVGRTFVLAAPTGKAAKVISSKTNCEAYTLHKTIYSFKDIVEYKDESNGSETYKFYADLRVNELSADTVFIVDEASMVSDVYQESEFFRCGSGKLLSDFLKFVNLDQNDHNKKVIFIGDDAQLPPVGMSHS…
1	2107	GC_00000114	other	emors_4_1	84748	37.2	38.1							EFF01800	36.842	5.93e-06	Toxin PAAR-like domain					MGIVKNEGRYIRSKSLRDSAIKRKHPLNFMDRAVASHHIISCEATRHLSSYRRKQITYKGYDINHPWNLVILPMKDRIACHYRMPLHKSGHKDEELITHYERSLGLSITNLTTQLKNEAEAETNQRKKKFYTEDIEVIDILNGYHKIIAVKLARTLKGLTCKSDPETFVETLDDLSIDIVGEISRYELLLLQRGKFFTKNQKGCNDCRIVDSKINRKHFGPLDNAPNKATVKKFCYNGSRLKTIKEQLPKKNNLAG
1	2109	GC_00000115	other	emors_4_1	84748	37.2	38.1											33.123	3.21e-117	RGD90075	tetratricopeptide repeat protein [Acinetobacter sp. SWAC57]	MISSKEVFALRRAGKVDDAYQMAVQLVANNAFDEWNVKALAWCLIDLIKRDATRLSQHQLDQYTRQLTEIRITNPEESLVRQTEYVISLCNPNGKLIAQAKAFSQSGEHLESADIYRKLMSSGAIDGSICTSLGWEIYRLLNQALSFEHVNVFNAKKLLFEYLKLPAIDKPSLLHSQMLRLAAKLAGDSSFDLSMFVRYWQLNYLQDDDFLPYITDNGEQYPSLAEKVIQQASKEAALKDNEENILYILPFLDEAIDRCAENVWLKLNKAKLLMKLDRGEGALKFALEVARNKVNDYWAWELLGDVNALINSDTALSCYCKALLCRADDKFTSKVRLKVVEHLLNQGEFSAAKHEIENVIRTKIAEGASIPEQVNMMTSSEWFRSFEAESSNKSFYRDN…
1	2111	GC_00000116	other	emors_4_1	84748	37.2	38.1	K01154	type I restriction enzyme, S subunit [EC:3.1.21.3]									35.971	4.66e-50	WP_117763209	restriction endonuclease subunit S [Collinsella sp. TM10-22]	MIKLGCNESLPFGWKWVEAGSVIDVRDGTHDSPKPVEKGIPLITSKNLKNGLIEFSTCSFISEEDHINIGKRSAVENGDILYAMIGTIGSPVIVNTTQAFSIKNVALFKFNKPDVYNRFFYHFLNSTLVKQQFDKNARGGTQKFVSLGNIRALQIPLPPLEEQKRIAAILDKADAIRQKRKQAIELADEFLRSVFLDMFGDPVTNPKGWEVKPLSELTTKITDGTHKTPSYIDLGVPFLSAKNIKPWGLDFEDTKFISREEHEQLIKRCNPELGDILLSKSGSLGTPAIVDTKNEFSLFESAALFKLNKAMIEPEFLYHFIRSEPAKYMLLKNTKGVAIKHLHLKELRELKIIYPPRELREDFIRVAEQVKRFVLKSSLSDIESVHCFHSLSQKAFSGQL
1	91	GC_00000001	flanking	emors_4_2	83600	37.2	38.2											47.917	1.71e-27	RGC81918	PTS fructose-like transporter subunit IIB [Hungatella hathewayi]	MKIVAVTACPTGIAHTYMAADVLKKAAAKLGVSIKVETQGAMGVENVLTPVDIVSADLVIIASDIEIEDKNRFLGINSKQFPIETILTDVEGILKKHLF
1	92	GC_00000001	flanking	emors_4_2	83600	37.2	38.2	K11203	fructoselike PTS system EIIC or EIIBC or EIIABC component									61.295	0	WP_117709256	PTS fructose transporter subunit EIIC [Fusobacterium mortiferum]	MDITSLINANVICLDLKSTSKEDILQEMVQILADAGKLSNKTQFLADVWAREEIGNTGFEDGIAIPHAKSSAVLTPSVAIGISRTGIDYGAEDGEPSDIFFMLASTDGDDNQHIEALAQISSRLIEDGFTNKLKKADSKEEILDLFTDIIQPSTESTDIENTPPQTEKSELTRKLGRTKEHLLFGTSHMIPFIVAGGVLLSLSVMISGQGAVPTEGILADIAQMGIAGLTLFTAVLGGYIAYSIADKPGLAPGMIGSWIAVQQYNTGFLGAIIIGFFAGFVVRSLKKIKLPESMASLGSIFIYPLVGTFLTCAAVMWVIGAPISNAMAMLNEWLASMAGSGKIALGAILGAMAAFDMGGPINKVATLFAQTQVNTQPWLMGGVGIAICTPPLGMALATF…
1	183	GC_00000002	flanking	emors_4_2	83600	37.2	38.2	K07001	NTE family protein									30.926	2.54e-100	WP_119143698	patatin-like phospholipase family protein [Pseudomonas reidholzensis]	MRHVFRLNLWFVFLATFLFTPYLYAEPIKEPSRPKIALVLAGGGAKGAAHIGVLKALEELNIPIDIITGTSMGAYVGGLYATGKSVPEIEGYLHTVDWYSGYQDEVGREEKNIRDKKYEDRFAINPSLGIRKEGVKSPKSAIQGQNMLKILRETSGNPVSVASFDDFPIRYRSVATDIVSMEEVVIDHGLLVDAMMASMSVPGALPPYEFEDKLLIDGGVTNNMPVELAKEMGADIVIAVDISSNYMTKEQIGSLFDVASQLTNFMVKRSTQEQTEFLTDKDILLQPRVGDIETTDFSSMPRAYQEGYDTVMTLKSRLKSLAVTPNEYAQYQNKIKQQSANVRLAQGTIIDKVDVENRSHYESDKLARFIQFEQGTWLNSDYIEDKIHSLYATNRFETI…
1	252	GC_00000003	flanking	emors_4_2	83600	37.2	38.2											30.097	1.21e-08	WP_116986099	phosphoenolpyruvate--protein phosphotransferase, partial [Escherichia coli]	MELNTIDYRITFFVKDHGLPPQVASQLTRLAKKFKSLVYIDNITQNRSTNAESSLGLLQVGLCPGDFCQLITVGMDAEWANFVLTDLLSSTFDFVASDKLCDFSETITNTYPQLTPQCEVDFHYVKAQAVLSKFEILKGLSQLIYPKESDELLLALIKREERSSTAMAKQIALPHVISPYVEKPTIAIIRSDYPVDWASKMGDVNVIIALVLPEKPTKEMIMAATYLTRSLLSEDFSQRLVHTRQPKGLQALILYAMCQLL
1	320	GC_00000004	flanking	emors_4_2	83600	37.2	38.2	K01809	mannose6phosphate isomerase [EC:5.3.1.8]	M00114	Pathway modules; Carbohydrate metabolism; Other carbohydrate metabolism	M00114	Ascorbate biosynthesis, plants, fructose6P > ascorbate					62.66	6.04e-175	WP_005478337	mannose-6-phosphate isomerase, class I [Vibrio parahaemolyticus]	MNALKPQTFYPMTNVIQDYAWGSHTSIEALFDIKNNTGKPQAELWMGAHPNGCSAVTVNGDSVLLSDLINQDKEAFLSKTTADAFGELPYLFKVLAAEKALSIQVHPNKQQAVDGFEKEEKAGIALTAFNRNYKDNNHKPELVYALTDYKAMNGFRDYQEIVSLFSAMHLPTIASYVDDLAQEPNSNGLQRFFKAILSLENETKERAVAELLDYASSSTDKLFVLLQELAIQYPNDVGLFAPLMLNVITLKPGEAMFLSACTPHAYIHGTGLEIMANSDNVLRAGLTPKYMDIDELMSCTEFVSQPLSSLLTQPNTVDGGMSYPIPVNDFKFSVFTATDALTLETNSAEILFAIDSNLTLTHENGESVTVAKGHSVFVPAYAKRYSLTSNGNVARAYN
1	386	GC_00000005	conserved_T6SS	emors_4_2	83600	37.2	38.2											50	4.43e-11	P96156	Chitodextrinase; AltName: Full=Endo-chitodextinase; Flags: Precursor	MIKLNKITAAITSVMFSGYLYAADASAASNLVTFVPGETKVQNGDMVSFNGDCFVAKNNPGVWESPTADSWFWDVAECSGEPNPGPGPNPGPNPTPDPDLGDIIPFIPGKTQVENGDVVSYENQCFIAQNNPGVWETPSASSWFWTLTECSDEPVNPEPEVTELSILAPTAGQVLTANEAISINAHVDGNLAAKVEFWANNTKLAEKTVNQNNTQYSQTWTPSEEGNATINVFVFDKNNQKIEQKSVSVTVKAEVTEDFVAPVVKFVTPANGSTMNVAESLSISVNATDADNDLATLVVKANNKEICSFDAANTDTFACDWQPTQAGNVTLNAIATDAQDLSSTATVRITVEEDVVEPPVEPPVTPGDLCKDFNVYPDWTRGDHATGGDIMVHASIAYS…
1	436	GC_00000006	conserved_T6SS	emors_4_2	83600	37.2	38.2	K11892	type VI secretion system protein ImpK									24	4.63e-08	WP_010910863	type VI secretion system protein TssL, long form [Mesorhizobium japonicum]	MSYVEDDVTVVLFQPEPGKPMEVMPAPDLSRNISVSELDISSMGINPLVDQFSWLIASLSCMSSIPWLDDPMPFREQVAREMRKGERMLNEMEVDRASILVIRYCLCAAMDESVCRQEWGANSNWSQNSLLSEFHNETSGGDKFFVILDRLKADPRKYRHVIEFLYLLLQLGFKGKYGRAERGAESLTEIGNTIYRLVRDERLAEQEKVALVDVKSKYLKKPLKRVLPPKLILGVSALLFAAMYAATYLVIDVRFQKLLSLYQ
1	475	GC_00000007	conserved_T6SS	emors_4_2	83600	37.2	38.2											41.363	6.13e-98	WP_011105819	hypothetical protein [Vibrio parahaemolyticus]	MTIFIVILTIYMVYVSRCHLFTNKYNACSLITTTRFYIFMRIFSFLKQCAGLGLILLISSCGGESKDTSPPKRETTSVSGILFDAPIAGARVVLWEYANGAIGKKLGETRTSSKGDYSMEVNSGSMPVLLQAFGGAYTDPATGEVVYEGDGKTLKFESTAYFYENKVNRIMLTPLSLISKGLADYKIHKLGMDAEGAIDSANSTISNMYGFDVITVEPIDIVKGGQSAYVTAGHQYGAYLTAYSVFSSDLIKKYPASDSSSIYTSFTLSDIMYRDISSDGQLDGYETDNISGLDKKISFGKESVSVETYTNILSQYILITVNNNRLNVSGTNPNDYKPFASKVNKLGTTPETMTVFPPRTEVPIDDTEPTVERSDKDVLVRLDSLDLLVKDNVGTKSLR…
1	514	GC_00000008	conserved_T6SS	emors_4_2	83600	37.2	38.2	K11906	type VI secretion system protein VasD									26.984	4.76e-15	WP_010910850	type VI secretion system lipoprotein TssJ [Mesorhizobium]	MRKLLTFSLIFLLSGCTMWDQFKESTGITPETSSIELIITADKVLNVREGGQSSPVILRIHELNSPVLFRNLDFFALFENDKDALGDEYIKRYEYQIQPGDVVHETLVLDPATRAIGFSVAFRDINGSSWRKVELIEEKSEYFLKLNLKESELSSNNTRGIEQIYF
1	552	GC_00000009	conserved_T6SS	emors_4_2	83600	37.2	38.2	K11893	type VI secretion system protein ImpJ									33.107	1.31e-83	WP_005463797	type VI secretion system baseplate subunit TssK [Vibrio parahaemolyticus]	MSLYNPVVWQDGMFMKPQHFQQLDRFQGKQSGMLSGFESPLHWGIKRIEINTELLALGKIGITHAEGILQDRTPFDLPLHASLPEVKDVDASVANKVLYLCCPLPSERSELFGTSKDGARYSIHTQDAVDACYDSEEIANITIGKLNFCLMYEDEDKSAYTSIPILKISEVKPDGSIILDNTYIPTCIDINASTVLKKFTTEFASMLRHRAESIVQRLGVVDQQGVSSVSDFMLLQALNRYEPLFWHFANIEGVHPEAFYRVLLQAEGELATLCSSSRRPQEFVPYNHGNLTSCLSTILHNSKVTLSVMSEQRAIPLPLKEQGYGIRIAPISDRSIVESTTFILAVKADVTLDILHTQFVSQTKIGSIDNIRELINLQLPGINIKPMPVVPRALPYHAG…
1	590	GC_00000010	conserved_T6SS	emors_4_2	83600	37.2	38.2											66	3.26e-97	WP_011105828	hypothetical protein [Vibrio parahaemolyticus]	MAKPIQLGFMALIMACSLPAFAKGERYGIAANFKTIESTEYEQGMSGELSTISYGLVHTRPIDENNNRWRWLFGFNYLSDYIEAPANGVYQEVTNYEFRIVPQYALGNWWAFTPYVGAGLSLGYSQYGNRWKVDDEGYKYGNQLDDIDQFEVGAVLSFGTVIKLGSNPDAHLQIIPQASYIQPIYNDGLGGLELSVSLLF
1	628	GC_00000011	conserved_T6SS	emors_4_2	83600	37.2	38.2											39.13	0.000443	WP_117539334	FHA domain-containing protein [Coprococcus catus]	MHLNQLTLFITKSPEEYTGSKHIEMPESGGSLGRNPSNTVSLVDHNRFISGSHCLISIYGDTYYLSDVSTNGTLVNGNKLLKNQPISLYDGDTIVLGRYEISVGLEKLSNSVNIAADISEETDSTDPLVNLTEYTPDEEQDKGNIADLFKETRIDKVDSSDPVAHLNFITQTNNDDHLLHGNEKKYEQKITEPVHTRQLLDDSDSVHSEFDVPNLIPEDWFSNDLANTSMPPVQIDEPIATSSESESESEPMVHSFVDSTPETIIPSVTEQLAWEDVTQTIQPSVSTTEPKSDEFFIAPSTSMDVYPSQSIETSFNSKMSDDAASAFYKGLGMSASQIEQTDEQFFQQMGNCLRLCINNLQKELSELKAIKNNEQDDSMTNIVELMLSLNHQQLLSPNE…
1	665	GC_00000012	conserved_T6SS	emors_4_2	83600	37.2	38.2											30.882	1.68e-20	WP_116949140	Lrp/AsnC family transcriptional regulator [Jiangella endophytica]	MSNMNLQGLDKLDRRIISNLLSNGRESIANLSRNVGLSRTAVAERINRLEKTGIIKGYTAQIRMGNKDENASSYLLISCNKGQKDSVSDGLKEIPEVKMTSIVGGTYDIICLIEAPDLHRIHYLCSEIESLSGIKEVKNTIVLHQPVCR
1	701	GC_00000013	conserved_T6SS	emors_4_2	83600	37.2	38.2	K11901	type VI secretion system protein ImpB									40	2.67e-32	WP_117580760	type VI secretion system contractile sheath small subunit [Enterobacter]	MSRDGSVAPKERINIRYVPATGDVQEDVELPLSMMVVGDFTARTDETPIEDRTPINIDKDNFNDVMEGYSPNVKVNVDNKLSDEEGAQLGVDLTFNSMKDFSPEAIAKSVPELNGLLELREALVALKGPLGNVPAFRKKIAAVLQDEEARQKLLEELNIGSAKEEAKAE
1	737	GC_00000014	conserved_T6SS	emors_4_2	83600	37.2	38.2	K11905	type VI secretion system protein													MEKGYRLLERIELGEPKNCYEKVVSHKHLIESIHLHLADLLNTHAGNAMIDNDYGLPDFNDVLSNNTNLVRNIQQNIKVSIEKFEPRMRNVEVHYRHDNNNPLQLGFGIGGEVIHNGGKVPMAINIFMGVDGQFNV
1	773	GC_00000015	conserved_T6SS	emors_4_2	83600	37.2	38.2	K11900	type VI secretion system protein ImpC									60.288	0	WP_117611541	type VI secretion system contractile sheath large subunit [Escherichia coli]	MTAEAQAPEQEAALVESGSLLDSILNETRLKPSDEGFDVAKRGVEAFIGELLSTNKSDKVDQSLVDLMISEIDQKLSKQVDAILHNEEVQAIESTWRGLKYLVDHTDFRENIQIELISAKKDEVLDDFEDAPEVVKSGLYKQIYTREYGQFGGKPVGAVICDFQMSASSPDIKLMEYMANVGAMSHAPFITSASAKFFGLDSYEELPNLKDLKSVFEGPQYTKWRGFREHEDARYVGLCTSRMMLRTPYSVEDNPIKAFDYNEHVKDGHDNYLWGNSAYAMASKISESFAKYRWCPNIIGPQSGGTVSDLPVYNYESMGQIETKIPTEILISDRREYELAEEGFIALTMRKGSDNAAFFSANSVQKAKVFPNTPEGQQAEMNYKLGIQLPYMFIINRLA…
1	809	GC_00000016	conserved_T6SS	emors_4_2	83600	37.2	38.2	K11903	type VI secretion system secreted protein Hcp									52.326	6.63e-65	WP_137712216	Hcp family type VI secretion system effector [Brenneria rubrifaciens]	MPTPAYMSIKGETQGDITKDAYSADSVGNVWQEAHVDEFLVQELDHVLTVPRDPQSGQPTGQRVHRPVVVTKQQDRCSPLLFNSLVSGEKLPECNIKFYRTSTSGKQEHYYTIKLIDALLVDMQTRMAHCQDAAMSDRVTEEVLKFTYRAIEVTHETCGTAGNDDWRTPREA
1	845	GC_00000017	conserved_T6SS	emors_4_2	83600	37.2	38.2											45.455	6.11e-08	WP_117031792	DUF2169 domain-containing protein, partial [Klebsiella pneumoniae]	MQLWDIDSESPFTLKGRFQRDSEGHEVWVLSMKRAWTFLDGSWSEEVDNLELNDDPIYLGEPGFSAMVADHDFPIYKKNTDVLIYGKARSYAKKPVHSQLCRVLIDEHIDKTLKVVGERHWVDHSGSITVSTTQLFIERDIDYSNAIGGDERNRIGGGAAETNAELLKAKVPSIFYPDQNWQASSKKVKVAGFGPIPPFFHDRAKWAGTFDEKWFEERRPVWPIDFDARFYQSAPQDQQCNGYLQGGERLMVSGFCHNDALSFRIPSEKFQAVAVFNGKEEKINMPMYTLWIDTENKRIEATYTAAFPCQNREHLLTSSYLVELS
1	881	GC_00000018	conserved_T6SS	emors_4_2	83600	37.2	38.2	K11895	type VI secretion system protein ImpH									32.344	1.8e-54	WP_000348794	type VI secretion system baseplate subunit TssG [Escherichia coli]	MIQYIVNKPCDYSFFQAVSLLEKHYQNLSGIEYKAIGENQYVKNEYIQFSVSPKLSFPKSDIEFITEFERNDASYTQIEVNFMGLHGVSSPLPASYTEKLAGRDPDDNPVKEFFDFFHHRYISMLYRVWKKYRYHIQYKSDAKDPFSGRLLHLVGLSSVIQESSEVDLDRAKLLSYVNQLSTRTRSPKLVSGIVSHYFTLSNVYIEEWVYRRITIAASQRNCLNRKNCQLGGDFHLGQSMADLTGKFNLCIDDIDFDTYVKFLPGGALHETLIGLMKFILCDPMAWDLKLTVRNKSLPINQLGDGLGNELGQTFWLGAAKGEETKIKIVGSN
1	917	GC_00000019	conserved_T6SS	emors_4_2	83600	37.2	38.2	K11914	sigma54 dependent transcriptional regulator									42.462	3.92e-78	WP_126397535	sigma 54-interacting transcriptional regulator [Blastochloris tepida]	MSLAKSDNLNNALLAISQSLADRSQLALTLDAILAAARQLTFADHGIIYVLDQTGQALLPSVVHHNEHILAEHPWQPLTLESIDETDPFSFAIQNGEVVLINDLYQYNGYQCDEIYQNESILNCQSKNLLAWPLIDNEKNTVGLLVLFDLNVINDEASLTCFCQMAATNIRQAVWLEKYGYMIKELSEDNASLTRENNQLKQRKQSQYSGPIAESEVMLNALARLDKVLSLPVDVLIRGETGVGKEVIAKYIHENSNRSKQALIVQNCAAIPEQLLESELFGHKKGAFTGADKDKIGLFEAADGGTLFLDEIGDMPLLLQAKLLRVLQERKFRPIGGNKEISVDVRVLAATHANLMEKIKKNEFRADLFYRLNVFPITIPPLRERTEDIIPLSEHFIKL…
1	953	GC_00000020	conserved_T6SS	emors_4_2	83600	37.2	38.2															MKPYLLLLPAALVVAGCSNQTSVPDPLAPYKNVHIIGNKKQSIGSFNYLSKDVDGYTDKQVIVYFNEIPFTSTFNLCADKGVYIANCKSTVSIFPSKNKGVIFNYDLNFYNGSYPARVGSMNILLPSTTTRKMDNLTQYTSAKFSEEQFLESETLEEATFILMKSS
1	989	GC_00000021	conserved_T6SS	emors_4_2	83600	37.2	38.2	K11891	type VI secretion system protein ImpL									22.962	6.63e-68	AFJ27267	IcmF-like protein [Escherichia coli Xuzhou21]	MIKNTLARTPFILSTVISAFFALLLVGVYYLWFNQADLRLLWGMLGIIFSIYAIFNLTLYIKKRKNKSHQNIETEEDTLSMVLKPLLHKAGKKPVYLVLGNKGSGKNQFLNVSNAIKPMDKVKNVKNDFFEWSESDSAVYIKPNHRLTFQEISSNDSLLWDALINEVIKHKPRKPFAGCMLLIDFEFLIVHDDEQTDYTLNALLQRLESIKETTGATLPLYLIMTKLDKLEGFKEYIHFSPLKSSVEFLAIPLKDAKGAILDYFRDSYKNIVKVMESNALDSSSYTNNPDEKQTILAFPKQFELCEKEISRIIERLNELNQGTYSIDIREVFFSSSLQGGRKYNLLAKSCSNYFNLPIIASEHSQLTETPYFTRFLVDAKVLPESDYSAENQHYLKRIQ…
1	1025	GC_00000022	conserved_T6SS	emors_4_2	83600	37.2	38.2	K11896	type VI secretion system protein ImpG									32.241	4.4e-90	WP_117681754	type VI secretion system baseplate subunit TssF [Klebsiella pneumoniae]	MSNSKYFQDELTYLKEAGSEFAKYHPKLTHFLSEGTFDPDVERLLEGFAFLTGRVREKIDDELPELTQSLISLLWPHYMRSVPSMCISELVPHSGSVTEKIIVERGAEMASEQVEGTQCQFRTCYDVALYPLSIQQIEQNNSRTNSSLHLTIAANNGLELSRIKLDILRFHLHGEQHITRSLYLWLFRYLEYVELDVGGGYKHRLRADQVVPVGFGDDEGILPYSKNSFSGYRLLQEYFSLPDKFMFFDLKGLEWLGGIPQRSTVKISFAFSRALPSEVIVKNKHFKLHCTPSVNLFEKDGDPIRLDHQLNEYKVRPQSSNQEHYEVYSVESVESWSKAERCRKKLIEFESFEHQINQRDKRDFYKTKVSERINGRGLERYISFHSHNNQVSELGSETV…
1	1061	GC_00000023	conserved_T6SS	emors_4_2	83600	37.2	38.2	K11910	type VI secretion system protein VasJ									24.104	3.23e-24	WP_119144555	type VI secretion system protein TssA [Pseudomonas reidholzensis]	MTSLNFESLLKPISEVAPTGEESKYEFCYELMELEIKKFGSLFGETVDWKVVETNAIEVLTTYSKDLKAICYLIRALIERNGFEGLEEGLNLLKQNLVLFGADLYPQRKRARDGAMEWFVAQLETTLPKLDTSTTNWESVASYLQRINEISDQYYEVFPDSEVEFYLITSVLNGISQRVVGAAETNTDTSRNTVCEPEPLVEETTSTVTEVKTPVQAVTQVPRTVNTVKQEVDIDTDFTSPSASKRTLKKVAEFMLHSDISIPLAYRLHRNCTWCDVDELPPHDNAKKTPLSLAVSQDQLSEYRDKAKQETEIEVIKRLERTLTDAPFWLTGHYLMFQMLTNLDHNEAAEAVKQETQHFISQLEGIELLTFANSTPFADEETLKWLSSNTTSTPVAVAA…
1	1097	GC_00000024	conserved_T6SS	emors_4_2	83600	37.2	38.2	K11907	type VI secretion system protein VasG									45.395	0	WP_117580830	type VI secretion system ATPase TssH [Enterobacter]	MININLSSLIQRLHPITKVALEDAAALAVSERASEVQIEHFLLSLLERPNSDFDQLLAHFECSENLLRQAIKSTLENSHKSNGGKPVFSAMLIEWLQEAWLVSSLDLSETQIRSGALLLTLISNPLRYGQHGYSSLLENINPETLKRNFAELTSRSIESQVATSEQTHAREDGSALSKFTTDFTGKARKGEIDPVFCRDQEIRQIIDILARRRKNNPIAVGEPGVGKTAVVEGLALKIVQGEVPDCLKGVELYGLDMGLLQAGASIKGEFEKRLNAVLDEVKNSPTPIILFIDEAHTLVGGGNQAGGSDAANLLKPALARGEVKTIAATTWSEYKKYFEKDPALARRFQLVKLDEPSTEQAALIIRGLRAVYEKSHNVYVRDDAITAAATLSDRYISGR…
1	1133	GC_00000025	conserved_T6SS	emors_4_2	83600	37.2	38.2	K11904	type VI secretion system secreted protein VgrG									37.634	3.7e-118	WP_002213876	type VI secretion system tip protein VgrG [Yersinia pestis]	MVSDIEFKFEVLGTEHEFRVESFNVVEELSKPFHVSLSLLSLDADITFDELIRKPALLSIFGQGVGTARQFHGVVNEVRYLGEGRRFSRYQITLVPQLWFLTQRQDCRIFQEKSVVDIVTEVLDGAAVTDYRFDISALYPTKEYVLQYRESDSHFVQRLLAEHGLWYYFEHTTANHTMVIVDKNDAIAELENTPLNSSYVGPVIYQADGGGNADREHIFDLESINRVRTGHVTHTDYNYEQPRIPQKMESSGLIDTDLAFFDYPGRYIEPSQGLVRADELMAESVVDNYQIEAASNVMRLIPGYSFILDKHPRRALNRDYTILTVTHSGYDPQVHEDEANEMPTTYQNQFSCLPRDIEFKAPKIAAPAVDGPQTAVVVGPAGEEIYTDKLGRIKVQFHW…
1	1169	GC_00000026	conserved_T6SS	emors_4_2	83600	37.2	38.2															MVRLQLTNSIEVTGAIDENSQAESLACVPRFGKVISLHPTMSDRIYVEFDGLATGSTALAKIGRLFRKSELEFAIESGLTCRIEFLNGDITLPVLTDIFFSLLDDDQPVILRAKSLIIEAENELIVRSGATQTKYSGRDGRVTTQAKYITSQAEKAQKIQGSTIAVN
1	1205	GC_00000027	conserved_T6SS	emors_4_2	83600	37.2	38.2	K11911	type VI secretion system protein VasL									45.517	1.54e-125	WP_011105827	type VI secretion system ImpA family N-terminal domain-containing protein [Vibrio parahaemolyticus]	MLGLKFNMNLSDFARRPISIEMPSGINPNSLDDFSEIKREVNKLNTVTSKISWKHVFKLSKSILETESKDIRCACYYTVSATHIDGLKGLVNGLNALLDICVIYWHSGYPDVNKTTARMGAFEWLTEHTIKKQKTLKISPTDLVLIETGHKLTLKIEEELRSHYGNKSPSLGAIRRIFSQWIEEIQTTKLSLEEQRLKKEAIEKQNNSGINVNVSLPPRDESKKTAQPTMTHTEKDKNIKPMVTISLAFIFILTLLFGHFLYADNQKSTLLINIQKADLTTINPLISQLENKEDDLKQYVKTALIKQALHLNKDWEVTSTKVDKINELETLNHSLKNLYPDSAAVKKLEYEFNQQRADFENEYSDIHQRFLKSRTIFANAKNHNSDENIVKAYSYSNSL…
1	1241	GC_00000028	conserved_T6SS	emors_4_2	83600	37.2	38.2															MSIYQHQYILDSDIVVPTGMNTELAIAIARADIDRFATYEDGNEKYTIASLEFVDQTCLMTKVQETLNVLITPLLDRLHISLKPLPLLLSVPQEISEHDLRNWIDESDFSDYLSNIKFSKNSGNAFLQECLNSLAEPDAIMCIAIDSLYDKKEALISSRDAMSGTNPWGVLPSEGGAGMVLTKRNVLDTLKLIPQSKIVYSQFDWHSSDRRGCARLIRAASKHHDNLGPIYSDMTNQRAHTEDYGFAIGARSEVIPYAQQVTLTNEFWGTIGGGSGIATLATMNHLSTVGVLSTAFLFDQNNTRSLFILNREK
1	1277	GC_00000029	conserved_T6SS	emors_4_2	83600	37.2	38.2											30.526	2.05e-17	WP_138184353	serine/threonine protein kinase [Paenibacillus alvei]	MSELQGSTNDFINQLVVKAIEKKKKNEQTLANKLKPRLEHVLFSQFDVLETIESHNQKTTLYRLAKKDEPEKQICCKVLNSEQPEHVQEMFVAEATHLEVAQHPSIIDFIKLGNEFERPYFMYKWAEGESVAEKLTRHKYKSFRHDHIAWLIYQLAGALEYIHTKGICHLDIKPSNIIICEDDSIKLIDFGAAQYINDSRKYNEASLSYASPKYIESGKAVPQDDVYSMALLVCALFTGYSDNNDWKALLQQRKRPHTIPKTVWNLLRLVVIKPRTHGLTPISFAQALAHIDISVMQGSHNAPLFAQLRNADLVLRKSSKYDVFRLGRFKYLEASLAACLCLITFTVLLKSFAFTVADSNAVSLSDTSSRIKPAQAATFLSQPPWEIENALDNNSSDVV…
1	1313	GC_00000030	conserved_T6SS	emors_4_2	83600	37.2	38.2															MNRYRYLVDDVKKTLTDADKQQAMADIALAQEQLSSFSENMINFLYTKAILAAETASFYIKQQYRFHQNGYPAKEIDYLTLLETQLSEIEKVFIALLRIHRGFVYVVYSEYPEVLAWLCLSKNIESQHDNDELTLLGISIIEQLDPELAMSLILRSNSNHIHKLLARFIEGGASKRELYYRCLVINQSVSVSLIKHWLEDKKLPEKMLHSYLALMNVGSSIEWLQELTNVDDLLFENLILKEDRATWFRQQYSVDTISSETANTYSKLLTLKEFSLFDIEKEQAVIHFILSGDTELAPLIIEHLMQLDEVDAQLWCEGLFLVYGEEFPFLPSKLGNTIEWQDALHEIVEWQEQIEVVKPVPLRMGQKLTFDSSIRAMKSAELSSSLREWLWRELCIMSR…
1	1349	GC_00000031	conserved_T6SS	emors_4_2	83600	37.2	38.2	K19304	murein DDendopeptidase [EC:3.4.24.]									34.247	3e-39	WP_116986330	murein DD-endopeptidase MepM, partial [Escherichia coli]	MKLKYLTFISINLAFIILSIFLLYFSSNHSSVINGSQLSTSPQKNVFDETKQKPDNLVINGTIKDSFFSSALNAGLTSKQIFSFTEALHNSVNFIDGIEDDTPYSIVLDKNTSHIRSFFYTENNRLHTFQLTENGIYYNELGVNLSSNKLILPTGNLFRISSHFSNKRKHPVVGIVQAHVGTDYATPIGTPVMSVSKGIVSRSEYHPLAGNFISIKHNNGITTRYLHLNDRYVNKGDHVYKGEIIGKTGNSGRTTGPHLHFEYIVNNIPQDFTKLHNDIEMPLNNKNQKKLLKCINLSKTLITKILKEA
1	1384	GC_00000032	other	emors_4_2	83600	37.2	38.2															MKKILLLALFSITLMGCNDPENVAAEAAQLRAEQHPDRTYVGEHNYYTMESSGDIQFTTKKDLKVMYQDFPRYFIEKAKEWPKEDLNDARSYDLPRFQFAWANSSSKDEYESGIKIWSMKTDGTDLRLVTDVTVELVNGIKNLTRSPNNRYVAWADLGGYKTVYDIKTGKVVELSISMSPLAMLWSEDSRYLYFERARDLFSRWDSVTGEVSKVDFDIETSAVSYGGNRIVVYPFGVTVFDSITNEKKLLIDVDEKLPFKEARMTVRSIDPTGHYAWGSNPSFGFFFDIEKGTVKQMTTDFTPAQILGKDAYYSALNSFAKVRIVDRVGDRVWSWRAFYYGTLSGDAILYNGLANNGLWFKGDK
1	1418	GC_00000033	other	emors_4_2	83600	37.2	38.2							EFF01293	41.421	8.79e-154	NA					MHFNCKLIPSSSLSHKELEYILTPDEFVRLLSRGKNSQSIINQLPVQLRQSLSISVSKSVQSLLFSLNQKLIKAEWIAVSTTVRKTGVSDTQLAQYPQLKKQIDRVETTQPAKFVKANFKPVTDDVPLVRNLSFTPVEPSPEHKISIEFAGQWPNNAASLLLAKSGEQKEKIAKPRADIHASHRSIATFKDLEPELRNLYLTIPMNGTPQPLKLLLAENIQPVDKETEMDEWDTVLVPVVPMKKLGEEYSLHQTGYFYVIWNGKVWREITIDSNGYFCDLDIQHERQEPLSTRHVNINASEFFPEANMSFEKFELYQEGQKVFSGELDVCEQSRVFNLVAEEVELKFVDFEHDEILLTTFESPIKNNASNERQAMSYPMPHVWLPYKLLGEVQADCYVY…
1	1451	GC_00000034	other	emors_4_2	83600	37.2	38.2											28.049	5.25e-06	WP_005483532	OmpA family protein [Vibrio]	MPALKTYDHGVYLLGAYFVWKRRGQSESFPDWNKDASSDLTKEADLQNVRPIPFTPVLVDDVENPVLWGTNKDGLLCQLGYFDENTVPETVAKKQTFLRHKAPLTVNELSESQSYSLTFPPLNVIGQLAETHTSVKALNDSLKDIYSTKLLPEKPDLTQFAISKIKVSQLAEPYKNESDKPLTDEQNDYNDWYDKIIASEVKEIQGIITPVYHSLGVVFSSDLYVGAEVSLIQVKSKQDSSGEVEKVLATSFVTKEAPKKTQTQEEQEDLKKILPSAVFNFDPKLIDDGYFLLRTRFWVEEYLQKQQEFLGEEVKAKFPDSVKQGQLKFETHIEHEESRTVQDVYTYELHEKVTFKPVSGFGKLAMVCGDLISLEECLIYQYPTALPSYSDFMIQQGNP…
1	1482	GC_00000035	other	emors_4_2	83600	37.2	38.2															MAIQFTSIVESGRFKDRKFARLVLNTIILIIVLMVMTLEILDDYDILDLFNDIQDNIIAFTTLCYMSALYSYGYQLPLFKHQWQVFLILYLTLAQAVYVLGYLTYTQYDQHSIIYLLSYCLFWSLFYGYLIYTINNLKNDIK
1	1512	GC_00000036	other	emors_4_2	83600	37.2	38.2															MNSQYYIFSKTKLEYFPFQQTPKPIVPVEPDLLLEMTFSPKLFIINDIAEKVENLVQHGVEWLDARIDCSPSQPSDEQIKVFENFRMPYIHQTYRLTNEEKQYGKLNWLDFNSVDLDFSRLNNIPLEERLIFKLEEDFGYVFIHESVIELLKKHVKDVWVRDV
1	1538	GC_00000037	other	emors_4_2	83600	37.2	38.2															MCKQTNYSKYQKRVIKFLNDLLGADTPFTYERANNNHLKVLIDGVTKPLFTGSTPSDCKSINNFMAEVKRELRASKKEESKLSQPEKTGVVSAVTLSNAKLIQNCVKSLRTRITVLKEQEKESVLNNKCINGLNLKRIEIVKHSVSLALQARKQGTYLKPKELRTIEGMVHNHLNFMLPSMAYYAELLNSTSKDKLAKVQLNKQQASVHNESNKNNVISLEDKTQHAPIKEAKKLAKNPKQPVSNKNMNTKNSNSATELMAMSANNRVSLLRNLTKAQALMLIDDINQAMAANREEDIQAVIALIRDKDLPLDAIISRMEAA
1	1564	GC_00000038	other	emors_4_2	83600	37.2	38.2	K19135	CRISPRassociated protein Csx14									30.033	5.15e-20	WP_116935424	CRISPR-associated ring nuclease Csm6 [Verrucomicrobia bacterium]	MKNILIAVTGASPQVLTETIYALYTQGKPIPEVVYVITTENSKQTLKEGLFIQGYWDKLMADYQLPPIAFNSDHIWVITDDNGNALVDAKGVDDQSIMADFITRKVALLTQDNEVAIHASIAGGRKTMAFYMGYAMSLYGREQDVLSHVFVDDEFEFVSDFYYPTPVDCFIQGKQGEAINAKEATVTLAEIPFVRMRRQVDECIINQMETHSFSKTVSALNSANNTQVRVSISTKEKTVEVAGVKIPLTSKHLAIYLFFLSKDSRKATLDRYFEDDKTQTTDYLGVLDKMKADVRLYKTMGLEDEGQWRQKDHAELATLTKDFVRQSLNGLHKSLKDKLVPDLFEKIKVHSDGVKSGATYQISTEVLFICDDIEL
1	1590	GC_00000039	other	emors_4_2	83600	37.2	38.2							EFF01536	48.593	5.57e-108	Toxin PAAR-like domain	45.361	1.12e-18	WP_119719572	hypothetical protein [Klebsiella pneumoniae]	MGVTVAANGLSVVHQGSGGEANATLPDVCLTKVGKPIVPIPYGNNAKSADLAKGTTTITMDGGNPVAIKGSTFSKSTGDAGGDKKGVASGTIEAEAEFISASPTVKFEGKGVCRLSDQMTMNKANTMCLGGAQNPSVSLTLEEEGTYTVDLFLSYSDGDPVQGATYKLVDQTGAIFEGNLDTKGKASISGIAPGEFDIEYGEDSREFTPNIPTKENPNYNPNASAQMLIDETKRGEIGFWESSWRKTAGAASWIWGVILGDFNDDATVEQIIANTAITMLPVVDQAADVRDMVANTMTLLNEEERDKPENWLALSLTLIGCIPVFGSAVKGTCKVALKSGKATSKDDLLAIMRAMGKGDPEKFLRTLDWADYAKQTSQIISDVLQPCIEVATELASYAN…
1	1632	GC_00000041	other	emors_4_2	83600	37.2	38.2	K03427	type I restriction enzyme M protein [EC:2.1.1.72]									52.874	0	WP_117002891	type I restriction-modification system subunit M [Cysteiniphilum]	MLTGQLRNNIDTLWEKFWTGGVTNPLVVIEQISYLMFSRMLDMQETTAERKTKRTGQAFTRQFPETPEGQLLRWQNFKNMSGKELLPHLRNKVFPHFSQIELNGSDIAQFMADADVEIRSESVLLSAVEMVDQLPLDQSDVKGDIYEYLLSKLASAGINGQFRTPRHIIDMMVEMLDVQPTDVICDPACGTAGFLSRTMEYLTRTHTSPDSIYQDEDGNDVYTGDLLHEYQDHINNKMFWGFDFDSTMLRVSAMNMLLHGVSSANITYQDSLNKNFAELAQEENFFDKILANPPFKGSLDEQSVNPNVLATVKTKKTELLFLALILRMLKLGGRSATVVPDGVLFGSSKAHQDLRKELINNNQLEAMISLPSGVFKPYAGVSTGILIFTKGGSTDNVLF…
1	1649	GC_00000042	other	emors_4_2	83600	37.2	38.2	K01153	type I restriction enzyme, R subunit [EC:3.1.21.3]									33.764	0	WP_117002890	DEAD/DEAH box helicase family protein [Cysteiniphilum]	MTTSLNFELIREHNDKLTKLGSLAEQILHLDPGSAITRLRGFAEEVTKEIYAIESLPRLPQANFIELLKNDAFIDATETRLRDQLHFLRIEGNETAHGGDGSIKKAYAALGTAHSLSQYLAINYYGFRVADLTDLVYPEKPSSSALNQKQLEKVIEENQKQQDLLLQELERERQKRIELENKEQATAEQLSQAKSRSEQTANSLEWDENKTRQLLIDSQLAQAGWDRNNPDSVGIEVKVSHQPTKSGTGYIDYVLWDDDGTPLAVVEAKRSREHIQKGREQARYYAEGLAKEHNCLVPIVFYTNGYEICIWDTKQYNTYRQIFGFYSKDSLKFLQFQYQHKEPNLELLNPSSDIAGRPYQIEAIKSVTSQFQNQRRKALIVQATGTGKTRVSIALVELL…
1	1664	GC_00000043	other	emors_4_2	83600	37.2	38.2	K19147	5methylcytosinespecific restriction enzyme subunit McrC									38.292	7.2e-72	WP_117455722	McrC family protein [unclassified Firmicutes sensu stricto]	MKAKKEITLFEFGFVAKDDRAEAHSRVQKVSASSYDYLKRMCLGDESERKLLKLRSLDGMEVLQVQNYAGVIFTPDKTQIEVLPKIGKSANEIEGEEQARTSLLTMLRALKGFSHIQTASANITHQKMPLLEVFIGQFLHSVNTLVKRGLRSDYVRREDNLAYLKGKLNVGKQRRHNFINKHKFYCEYDEFLLDRPANRLIHSALLNVKSLARSAANQKLAQELAFVFHEVPKSHDHKSDFSKVKSGRGMNHYDVPLQWCQLILNGYSPQTMKGDHHAISLLFPMEKVFEDYVAKFIKAELAQSHPRLQLEMQATEEHLARYQQKGKFSLRPDLLIKHDKRNVAVLDTKWKLLDSKISNANLSQSDVYQMFAYAKKYLKRNADEQHANDVVLIYPMQAN…
1	1695	GC_00000045	other	emors_4_2	83600	37.2	38.2	K06946	uncharacterized protein									47.198	2.44e-95	WP_010981048	GTPase family protein [Neisseria meningitidis]	MKENNIFKDMENDVNASNLDEHTKQKFFSNILHLKNKKINLMITGATGCGKSSTINAMFNTDVAKVGMGVDPETMDIRKYELDNLILWDSPGLGDGKEKDIQHSKGIISKLNELDENGLPLIDLVLVILDGGSRDLGTSYELINSVIIPNLGENPKDRILIAINQADVAMKGRYWDFQNNKPEPKLVSFLEEKVESVKNRVKEATGVDIKPIYYSAGFKDEGEEQRPYNLSKLLYFIVKNTPLDKRLVYVNTTSDDKNMWSDNDEIKNYTAEIQKSFVETIVETSNVGGKIGKELGDILGMGKTGEAIGKVTGAVVGAFKSVVSSIFSWF
1	1696	GC_00000045	other	emors_4_2	83600	37.2	38.2	K06946	uncharacterized protein									42.857	1.91e-60	WP_010981048	GTPase family protein [Neisseria meningitidis]	MFKNYRKHDLNNNIKIMDVTPLDIMITGVTGAGKSTTINSIFNKSLAEVGRGVEPETMGLNSYTLNDCLRLWDTPGLGDGIKQDQIHSKKIIDLLYKTYSLDSNNYGFIDMVLIIIEGSNRDMGTNYKLINEVIVPNIQRERVLVAINQADMAMKGRHWDSLNNKPKERLKEFLDAQVISIQSRVKEATGVDIIKPVYYSAENNYNVDALLDLLIDNMPKNRRTIG
1	1722	GC_00000047	other	emors_4_2	83600	37.2	38.2	K07452	5methylcytosinespecific restriction enzyme B [EC:3.1.21.]									61.373	5.36e-88	WP_116971001	AAA family ATPase, partial [Escherichia coli]	MRAFLGWNKEKMARDNTKYKFEESVYGKGRLVHAVVATYIERYDATLAQLEQIFPGALQNKNGNVFITQQEYDERLSKSSDVENRFYNKTEDRLLTHDGITIYVSNQWGVGNVEGFYQQAIKQGFTIEKIISSSQATLEPFFTASNENTISPLNQILYGPPGTGKTYHTIEAAVKAAEPAFTWTNRDELKAEYARLVADKRIRFVTFHQSYGYEEFVEGLSAKTENEAIKYAVKDGVFKIISNNARKNLEDSQRDQQSLDREQNFDLALDAFKLSIFEGVGSLSLTDETSGSQAFSHSLFEEPANSRLTKAVSIVNVEDEGFRYCGDWKSSQIMKFSDLKVLYLAGVKTRQEIKLFEGVSGLAKQHSSYFLKALEQIEQFIPKELPQFEQRKKQNFVLI…
1	1738	GC_00000048	other	emors_4_2	83600	37.2	38.2															MKMTDTKKHAIKRLILNNHWEFETRTISKNGKQEIGAYSGNRTRIISLEG
1	1778	GC_00000052	other	emors_4_2	83600	37.2	38.2															MKVAYINEKLITSNAMFIASDNRDFLYSDMDFNPTSTQYPIIWEDKNMASFGVFDITNSGDLSVTAPIAEVFMSFDPYGVEFYPNRLNCADGMSDQIRYIIAIHNEVDVVDIDKSHIEKMVIKYNPEKHGYDIPDEDKKDVIMYRTSRLFLSEEKIQNLPENKKHIFRVKDTEAFFFSEEVYNALYNIAVDGKASGLTAYTFDTNEKAPKF
1	1967	GC_00000077	other	emors_4_2	83600	37.2	38.2															MSIVKKARPSLKDGKKIEKHFLTTKISCPITSHHLISFNLFDKVSSRRKKQINDHKYNRDAHENLILIPSKDKILAKRVACYYGLPWHSSGHTGKNIISHWSNTETERLERKAANLKTEKNADPFAPSNMQSKGNALTKEELQMYNKDIKKLKKTSGYHKVVASLFFTVLKKLKCNQNNVEYQGHLERLSLDICEYISYFELLLSNPGYDFSPNQVGCQEEHCNGRTHKTENEAWPSKEDVNFELKIDQRLKLVSEI
1	2094	GC_00000107	other	emors_4_2	83600	37.2	38.2	K01144	exodeoxyribonuclease V [EC:3.1.11.5]									39.854	0	WP_119063984	AAA family ATPase [Acinetobacter sp. SWAC57]	MNNNFALLQSRWPQLAEFAQYAELYVFSDPQSSLIKLRCYCESMVGLLYRELELKCEVNSSLHDKLKASVFTNVVNTDVCNKLHALRMKGNRAVHHNEASSENAVWLIKEAYLLGQWFYKTLTGDYSNAYPDFQPPICSTTSASTDTYTLEQRAERLKEELRAVEASEKKALEDLSRLQTALNEAKSTAFRNSSDAATQTIDFDSKTTLQNMSIHDAFAEYNLTEGQSELVKELDEFLSNKSQKVFQLKGYAGTGKTFITKGITEFLKSVGRTFVLAAPTGKAAKVISSKTNCEAYTLHKTIYSFKDIVEYKDESNGSETYKFYADLRVNELSADTVFIVDEASMVSDVYQESEFFRCGSGKLLSDFLKFVNLDQNDHNKKVIFIGDDAQLPPVGMSHS…
1	2110	GC_00000115	other	emors_4_2	83600	37.2	38.2											33.123	3.21e-117	RGD90075	tetratricopeptide repeat protein [Acinetobacter sp. SWAC57]	MISSKEVFALRRAGKVDDAYQMAVQLVANNAFDEWNVKALAWCLIDLIKRDATRLSQHQLDQYTRQLTEIRITNPEESLVRQTEYVISLCNPNGKLIAQAKAFSQSGEHLESADIYRKLMSSGAIDGSICTSLGWEIYRLLNQALSFEHVNVFNAKKLLFEYLKLPAIDKPSLLHSQMLRLAAKLAGDSSFDLSMFVRYWQLNYLQDDDFLPYITDNGEQYPSLAEKVIQQASKEAALKDNEENILYILPFLDEAIDRCAENVWLKLNKAKLLMKLDRGEGALKFALEVARNKVNDYWAWELLGDVNALINSDTALSCYCKALLCRADDKFTSKVRLKVVEHLLNQGEFSAAKHEIENVIRTKIAEGASIPEQVNMMTSSEWFRSFEAESSNKSFYRDN…
1	2112	GC_00000116	other	emors_4_2	83600	37.2	38.2	K01154	type I restriction enzyme, S subunit [EC:3.1.21.3]									35.971	4.66e-50	WP_117763209	restriction endonuclease subunit S [Collinsella sp. TM10-22]	MIKLGCNESLPFGWKWVEAGSVIDVRDGTHDSPKPVEKGIPLITSKNLKNGLIEFSTCSFISEEDHINIGKRSAVENGDILYAMIGTIGSPVIVNTTQAFSIKNVALFKFNKPDVYNRFFYHFLNSTLVKQQFDKNARGGTQKFVSLGNIRALQIPLPPLEEQKRIAAILDKADAIRQKRKQAIELADEFLRSVFLDMFGDPVTNPKGWEVKPLSELTTKITDGTHKTPSYIDLGVPFLSAKNIKPWGLDFEDTKFISREEHEQLIKRCNPELGDILLSKSGSLGTPAIVDTKNEFSLFESAALFKLNKAMIEPEFLYHFIRSEPAKYMLLKNTKGVAIKHLHLKELRELKIIYPPRELREDFIRVAEQVKRFVLKSSLSDIESVHCFHSLSQKAFSGQL
1	103	GC_00000001	flanking	emors_7_1_cat	64414	36.6	38.2											47.917	1.71e-27	RGC81918	PTS fructose-like transporter subunit IIB [Hungatella hathewayi]	MKIVAVTACPTGIAHTYMAADVLKKAAAKLGVSIKVETQGAMGVENVLTPVDIVSADLVIIASDIEIEDKNRFLGINSKQFPIETILTDVEGILKKHLF
1	104	GC_00000001	flanking	emors_7_1_cat	64414	36.6	38.2	K11203	fructoselike PTS system EIIC or EIIBC or EIIABC component									61.392	0	WP_117709256	PTS fructose transporter subunit EIIC [Fusobacterium mortiferum]	MDITSLINANVICLDLKSTSKEDILQEMVQILDDAGKLSNKTQFLADVWAREEIGNTGFEDGIAIPHAKSSAVLTPSVAIGISRTGIDYGAEDGEPSDIFFMLASTNGDDNQHIEALAQISSRLIEDGFTNKLKKADTKEEILDLFTDIIQPSTESTDIENTPPQTEKSELTRKLGRTKEHLLFGTSHMIPFIVAGGVLLSLSVMISGQGAVPTEGILADIAQMGIAGLTLFTAVLGGYIAYSIADKPGLAPGMIGSWIAVQQYNTGFLGAIIIGFFAGFVVRSLKKIKLPESMASLGSIFIYPLVGTFLTCAAVMWVIGAPISNAMAALNEWLASMAGSGKIALGAILGAMAAFDMGGPINKVATLFAQTQVNTQPWLMGGVGIAICTPPLGMALATF…
1	189	GC_00000002	flanking	emors_7_1_cat	64414	36.6	38.2	K07001	NTE family protein									30.978	5.57e-101	WP_119143698	patatin-like phospholipase family protein [Pseudomonas reidholzensis]	MRHVFRLNLWFVFLAIFLFTPYLYAEPIKEPSRPKIALVLAGGGAKGAAHIGVLKALEELNIPIDIITGTSMGAYVGGLYATGKSVSEIEAYLHTVDWYSGYQDEVGREEKNSRDKKYEDRFAINPSLGIRKEGVKSPKSAIQGQNMLKILRETSGNPVSVTSFDDFPIRYRSVATDIVSMEEVVIDHGLLVDAMMASMSVPGALPPYEFEDKLLIDGGVTNNMPVELAKEMGADIVIAVDISSNYMTKEQIGSLFDVASQLTNFMVKRSTQEQAEFLTDKDILLQPRVGDIETTDFSSMPRAYQEGYDTVMTLKSRLQSLAVTPNEYAQYSNRIKQQSANVRLAQGAIIDKVEVENRSHYESDKLERFIQFEQGTSLNSDYIEDKIHALYATNRFETI…
1	258	GC_00000003	flanking	emors_7_1_cat	64414	36.6	38.2											30.097	1.17e-08	WP_116986099	phosphoenolpyruvate--protein phosphotransferase, partial [Escherichia coli]	MELNTIDYRITFFVKDQGLPPQVASQLTRLAKKFKSLVYIDNITQNRSTNAESSLGLLQVGLCPGDFCQLITVGMDAEWANFVLTDLLSSTFDFVASDKLCDFSETITNTYPQLTPQCEVDFHYVKAQAVLSKFEILKGLSQLIYPKESDELLLALIKREERSSTAMAKQIALPHVISPYVEKPTIAIIRSDYPVDWASKMGDVNVIIALVLPEKPTKEMIMAATYLTRSLLSEDFSQRLVHTRQPKGLQALILYAMCQLL
1	326	GC_00000004	flanking	emors_7_1_cat	64414	36.6	38.2	K01809	mannose6phosphate isomerase [EC:5.3.1.8]	M00114	Pathway modules; Carbohydrate metabolism; Other carbohydrate metabolism	M00114	Ascorbate biosynthesis, plants, fructose6P > ascorbate					61.381	9.14e-172	WP_005478337	mannose-6-phosphate isomerase, class I [Vibrio parahaemolyticus]	MNALKPQTFYPMTNVIQDYAWGSHTSIEALFDIKNSTGKPQAELWMGAHPNGCSAVTANGDSVLLSDLINQDKEAFLSKTTADAFGELPYLFKVLAAEKALSIQVHPNKQQAVDGFEKEEKTGIALTAFNRNYKDNNHKPELVYALTDYKAMNGFRDYQEIVSLFSAMQLPTIASYVHELAQEPNSNGLQRFFKAILSLENETKERAVAELLDYASSSTDELFVLLQDLAIQYPNDVGLFAPLMLNVITLKPGEAMFLSACTPHAYIHGTGLEIMANSDNVLRAGLTPKYMDIDELMSCTEFVSQPLSSLLTQPNTVDGGMSYPIPVNDFKFSVFTATDALTLETNSAEILFAIDSDLTLTHENGDSVTVAKGHSVFVPAYAKRYSLTSSGNVARAYN
1	392	GC_00000005	conserved_T6SS	emors_7_1_cat	64414	36.6	38.2											50	4.59e-11	P96156	Chitodextrinase; AltName: Full=Endo-chitodextinase; Flags: Precursor	MIKLNKITAAITSVMFSGYLYAADASATSNVVTFVPGETKVQNGDMVSFNGDCFVAKNNPGVWESPTADSWFWDVAECSGEPNPGPGPNPGPNPTPDPDLGDIIPFIPGKTQVENGDVVSYENQCFIAQNNPGVWETPSASSWFWTLTECSDEPVNPEPEVTELSILAPTAGQVLTANEAISINAHVDGNLAAKVEFWANNTKLAEKTVNQNNTQYSQTWTPSEEGNATINVFVFDKNNQKIEQKSVSVTVKAEVTEDFVAPVVKFVTPANGSTMNVAESLSISVNATDADNDLATLVVKANNKEICSFDAANTDTFACDWQPTQAGNVTLNAIATDAQDLSSTATVRITVEEDVVEPPVEPPVTPGDLCKDFNVYPDWTRGDHATGGDIMVHDNIAYS…
1	437	GC_00000006	conserved_T6SS	emors_7_1_cat	64414	36.6	38.2	K11892	type VI secretion system protein ImpK									24.8	1.8e-08	WP_010910863	type VI secretion system protein TssL, long form [Mesorhizobium japonicum]	MSYVEDDVTVVLFQPEPGKPMEVMPAPDLSRNISVSELDISSMGINPLVDQFSWLIASLSCMSSIPWLDDPMPFREQVAREIRKGERMLNEMEVDRASILVIRYCLCAAMDESVCRQEWGANSNWSQNSLLSEFHNETSGGDKFFVILDRLKADPRKYRHVIEFLYLLLQLGFKGKYGRAERGAESLTEIGNTIYRLVRDERLAEQEKVALVDVKSKYLKKPLKRVLPPKLILGVSALLFAAMYAATYLVIDVRFQKLLSLYQ
1	476	GC_00000007	conserved_T6SS	emors_7_1_cat	64414	36.6	38.2											41.363	5.19e-98	WP_011105819	hypothetical protein [Vibrio parahaemolyticus]	MVYVSRCHLFTNKYNACSLITTTRFYIFMRIFSFLKLCAGLGLILLISSCGGESKDTSPPKRETTSVSGILFDAPIAGARVVLWEYANGAIGKKLGETRTSSKGNYSMEVNSGSMPVLLQAFGGAYTDPATGEVVYEGDGKTLKFESTAYFYENKANRIMLTPLSLISKGLADYKIHKLGMNAEGAIDSANSTISNMYGFDVITVEPIDIVKGGQSAYVTAGHQYGAYLTAYSVFSSDLIKKYPASDSSSIYTSFTLSDIMYRDISADGQLDGYETDNISGLDKKISFGKESVSVETYTNILSQYILITVNNNRLNVSGTNPNDYKPFASKVNKLGTTPETMTVFPPRTEVPIDDTEPTVERSDKDVLVRLDSLDLLVKDNVGTKSLRVSLQYQDDLGW…
1	515	GC_00000008	conserved_T6SS	emors_7_1_cat	64414	36.6	38.2	K11906	type VI secretion system protein VasD									26.984	4.76e-15	WP_010910850	type VI secretion system lipoprotein TssJ [Mesorhizobium]	MRKLLTFSLIFLLSGCTMWDQFKESTGITPETSSIELIITADKVLNVREGGQSSPVILRIHELNSPVLFRNLDFFALFENDKDALGDEYIKRYEYQIQPGDVVHETLVLDPATRAIGFSVAFRDINGSSWRKVELIEEKSEYFLKLNLKESELSSNNTRGIEQIYF
1	553	GC_00000009	conserved_T6SS	emors_7_1_cat	64414	36.6	38.2	K11893	type VI secretion system protein ImpJ									33.107	1.46e-83	WP_005463797	type VI secretion system baseplate subunit TssK [Vibrio parahaemolyticus]	MSLYNPVVWQDGMFMKPQHFQQLDRFQGKQSGMLSGFESPLHWGIKRIEINTELLALGKIGITHAKGILQDRTPFDLPLHASLPEVKDVDASVANKVLYLCCPLPSERSELFGTSKDGARYSIHTQDAVDACYDSEEIANITIGKLNFCLMYEDEDKSAYTSIPILKISEVKPDGSIILDNAYIPTCIDINASTVLKKFTTEFASMLRHRAESIVQRLGVVDQQGVSSVSDFMLLQALNRYEPLFWHFANIEGVHPEAFYRVLLQAEGELATLCSSSRRPQEFVPYNHGNLTSCLSTILHNSKVTLSVMSEQRAIPLPLKEQGYGIRIAPISDRSIVESTTFILAVKADVTLDILHTQFVSQTKIGSIDNIRELINLQLPGINIKPMPVVPRALPYHAG…
1	591	GC_00000010	conserved_T6SS	emors_7_1_cat	64414	36.6	38.2											66.5	9.05e-98	WP_011105828	hypothetical protein [Vibrio parahaemolyticus]	MAKPIQLGFMALIMACSLPAFAKGERYGIAANFKTIESTEYEQGMSGELSTISYGLVHTRPIDENNNRWRWLFGFNYLSDYIEAPKNGVYQEVTNYEFRIVPQYALGNWWAFTPYVGAGLSLGYSQYGNRWKVDNEGYKYGNQLEDIDQFEVGAVLSFGTVIKLGSNPDAHLQIIPQASYIQPIYNDGLGGLELSVSLLF
1	629	GC_00000011	conserved_T6SS	emors_7_1_cat	64414	36.6	38.2											39.706	0.000465	WP_117539334	FHA domain-containing protein [Coprococcus catus]	MHLNQLTLFITKSPEEYTGSKHIEMPESGGSLGRNPSNTVSLVDHNRFISGSHCLISIYGDTYYLSDVSTNGTLVNGNKLLKNQPISLYDGDTIVLGRYEISVGLEKLSNSINIAADISEETDSTDPLVNLAEYSPDEEQDKGNIADLFKETRIDKVDSSDPVAHLNFITQTNNDEHLLHGNEKKHEQKINEPVHTRQLLDDSDSVHSEFDIPNLIPEDWFSDDFSNSLNSTQSINEEIGSAPSIPDPIVQPAVELTPEPVVSPASEQQSWEDVTQTIQTSSSTIESTNDDFFAASSMSTDVYSSPMQSIEAPYSSKTEDAKNAFYKGLGMSAAQIEQTDEQFFQQMGNCLRLCINNLQKELSELKAIKNNEQDDSMTNIVELMLSLNHQQLLSPNELI…
1	666	GC_00000012	conserved_T6SS	emors_7_1_cat	64414	36.6	38.2											30.882	1.68e-20	WP_116949140	Lrp/AsnC family transcriptional regulator [Jiangella endophytica]	MSNMNLQGLDKLDRRIISNLLSNGRESIANLSRNVGLSRTAVAERINRLEKTGIIKGYTAQIRMGNKDENASSYLLISCNKGQKDSVSDGLKEIPEVKMTSIVGGTYDIICLIEAPDLHRIHYLCSEIESLSGIKEVKNTIVLHQPVCR
1	702	GC_00000013	conserved_T6SS	emors_7_1_cat	64414	36.6	38.2	K11901	type VI secretion system protein ImpB									40	2.67e-32	WP_117580760	type VI secretion system contractile sheath small subunit [Enterobacter]	MSRDGSVAPKERINIRYVPATGDVQEDVELPLSMMVVGDFTARTDETPIEDRTPINIDKDNFNDVMEGYSPNVKVNVDNKLSDEEGAQLGVDLTFNSMKDFSPEAIAKSVPELNGLLELREALVALKGPLGNVPAFRKKIAAVLQDEEARQKLLEELNIGSAKEEAKAE
1	738	GC_00000014	conserved_T6SS	emors_7_1_cat	64414	36.6	38.2	K11905	type VI secretion system protein													MEKGYRLLERIELGEPKNCYEKVVSHKHLIESIHLHLADLLNTHAGNAMIDNDYGLPDFNDVLSNNTNLVRNIQQNIKASIEKFEPRMRNVEVHYRHDNNNPLQLGFGIGGEVIHNGGKVPMAINIFMGVDGQFNV
1	774	GC_00000015	conserved_T6SS	emors_7_1_cat	64414	36.6	38.2	K11900	type VI secretion system protein ImpC									60.288	0	WP_117611541	type VI secretion system contractile sheath large subunit [Escherichia coli]	MTAEAQAPEQEAALVESGSLLDSILNETRLKPSDEGFDVAKRGVEAFIGELLSTNTSDKVDQSLVDLMISEIDQKLSKQVDAILHNKEVQAIESTWRGLKYLVDHTDFRENIQIELISAKKDEVLDDFEDAPEVVKSGLYKQIYTREYGQFGGKPVGAVICDFQMSASSPDIKLMEYMANVGAMSHAPFITSASAKFFGLDSYEELPNLKDLKSVFEGPQYTKWRGFREHEDARYVGLCTSRMMLRTPYSVEDNPIKAFDYNEHVKDGHDNYLWGNSAYAMASKISESFAKYRWCPNIIGPQSGGTVSDLPVYNYESMGQIETKIPTEILISDRREYELAEEGFIALTMRKGSDNAAFFSANSVQKAKVFPNTPEGQQAEMNYKLGIQLPYMFIINRLA…
1	810	GC_00000016	conserved_T6SS	emors_7_1_cat	64414	36.6	38.2	K11903	type VI secretion system secreted protein Hcp									51.163	4.3e-64	WP_137712216	Hcp family type VI secretion system effector [Brenneria rubrifaciens]	MPTPAYMSIKGETQGDITKDAYSADSVGNVWQEAHVDEFLVQELDHVLTVPRDPQSGQPTGQRVHRPVVVTKQQDRCSPLLFNALVSGEKLPECSINFYRTSTSGKQEHYYTIKLIDALLVDMQTRMAHCQDAAMADRVTEEVLKFTYRAIEVTHETCGTAGNDDWRTPREA
1	846	GC_00000017	conserved_T6SS	emors_7_1_cat	64414	36.6	38.2											45.455	1.51e-07	WP_117031792	DUF2169 domain-containing protein, partial [Klebsiella pneumoniae]	MQLWDIDSESPFTLKGRFQRDSEGHEVWVLSMKRAWTFLDGSWSEEVDNLELNDDPIYLGEPGFSAMVADHDFPIYKKNTDVLIYGKARSYAKKPVHSQLCRVLIDEHIDKTLKVVGERHWVDHSGSITVSTTQPFIERDIDYSNAIGGDERNRIGGGAAETNAELLKAKVPSIFYPDQNWQASSKKVKVAGFGPMPPFFHDRAKWAGTFDEKWFEERRPVWPLDFDARFYQSAPQDQQCNGYLQGGERLMVSGFCHNDALSFRIPSEKFQAVAVFNGKEEKINMPMYTLWIDTENKRIEATYTAAFPCQNREHLLTSSYLVELS
1	882	GC_00000018	conserved_T6SS	emors_7_1_cat	64414	36.6	38.2	K11895	type VI secretion system protein ImpH									33.234	7.96e-56	WP_000348794	type VI secretion system baseplate subunit TssG [Escherichia coli]	MIQYIVNKPCDYSFFQAVSLLEKHYQNLPGIEYKAIGENQYVKNEYIQFSVSPKLSFPKSDIEFISEFERNDAVYTQIEVNFMGLHGVSSPLPASYTEKLAGRDPDDNPVKEFFDFFHHRYISMLYRVWKKYRYHIQYKSDAKDPFSGRLLHLVGLSSVIQESSEVDLDRAKLLSYVNQLSTRTRSPKLVSGIVSHYFSLSNVYIEEWVYRRITIAASQRNCLNRKNCQLGGDFHLGQSMADLTGKFNLCIDDIDFDTYVKFLPGGALHETLIGLMKFILCDPMAWDLKLTVRNKSLPINQLGDGLGNELGQTFWLGTTKGEETKITIVGSN
1	918	GC_00000019	conserved_T6SS	emors_7_1_cat	64414	36.6	38.2	K11914	sigma54 dependent transcriptional regulator									42.415	2.71e-78	WP_126397535	sigma 54-interacting transcriptional regulator [Blastochloris tepida]	MSLAKSDSLNNALLAISQSLADRSQLALTLDAILAAARQLTFADHGIIYVLDQTGQALLPSVVHHNEHILADHPWQPLTLESIDETDPFSFAIQNGEVVLINDLYQYNGYQCDEIYQNESILNRKSKNLLAWPLIDNEKNTVGLLVLFDLNVINDEASLTCFCQMAATNIRQAVWLEKYGYMIKELSEDNASLTRENNQLKQRKQSKYNGPIAESEVMINALARLNKVLLLPVDVLIRGETGVGKEVIAKYIHENSNRSKQALIVQNCAAIPEQLLESELFGHKKGAFTGADKDKIGLFEAADGGTLFLDEIGDMPLLLQAKLLRVLQERKFRPIGSNKEISVDVRVLAATHANLLSKIKKNEFRADLFYRLNVFPITIPPLRERQEDIIPLSEHFIKL…
1	954	GC_00000020	conserved_T6SS	emors_7_1_cat	64414	36.6	38.2															MKPYLLLLPAALIVTGCSNQTSVPDPLAPYKNVHIIGNKKQSIGSFNYLSKDVDGHTDKQVIVYFNEIPFTSTFNLCADKGVYIANCKSTVSIFPSKNKGVIFNYDLNFYNGSYPARVGSMNILLPSTTTRKMDNLTQYTSAKFSEEQFLESETLEEATFILMQSS
1	990	GC_00000021	conserved_T6SS	emors_7_1_cat	64414	36.6	38.2	K11891	type VI secretion system protein ImpL									22.863	2.65e-67	AFJ27267	IcmF-like protein [Escherichia coli Xuzhou21]	MIKNTLARTPFILSTVISAFFALLLVGVYYLWFNQAELRLLWGMLGVIFSIYAIFNLTLYIKKRKSKSHQNIETEENTLSMVLKPLLNKAGKKPVYLVLGNKGSGKNQFLNVSNAIKPMDKVKNVKNDFFEWSESDSAVYIKPNHRLTFQEISSNDSLLWDALINEVIKHKPRKPFAGCMLLIDFEFLIVHDDEQTDYTLNALLQRLESIKETTGATLPLYLIMTKLDKLEGFKEYIHFSPLKSSVEFLAIPLKDAKGAILDYFRDSYKNIVKVMESNALDSSSYTNNPDEKQTILAFPKQFELCEKEISRIIERLNELNQGTYSVDIREVFFSSSLQGGRKYNLLAKSCSNYFNLPIIASEHGQLTETPYFTRFLVDAKVLPESDYSAENQHYLKRIQ…
1	1026	GC_00000022	conserved_T6SS	emors_7_1_cat	64414	36.6	38.2	K11896	type VI secretion system protein ImpG									32.414	5.57e-91	WP_117681754	type VI secretion system baseplate subunit TssF [Klebsiella pneumoniae]	MSNSKYFQDELTYLKEAGSEFAKYHPKLTHFLSEGTFDPDVERLLEGFAFLTGRVREKIDDELPELTQSLISLLWPHYMRSVPSMCISELVPHSGSVTEKIIVERGAEMASEQVEGTQCQFRTCYDVALYPLSIQQIEQNNSRTNSSLHLTIAANNGLELSRIKLDTLRFHLHGEQHITRSLYLWLFRYLEYVELDVGGGYKHRLRADQVVPVGFGDDEGILPYSKNSFSGYRLLQEYFSLPDKFMFFDLKGLEWLSGIPQRSTVKISFAFSRALPSEVIVKNKHFKLHCTPSVNLFEKDGDPIRLDHQLNEYKVRPQSANQEHYEVYSVESVESWSKAERCRKKLIEFESFEHQINQRDKRDFYKTKVSERVNGRGLERYISFHSHNNQVSELGSETV…
1	1062	GC_00000023	conserved_T6SS	emors_7_1_cat	64414	36.6	38.2	K11910	type VI secretion system protein VasJ									24.75	5.24e-25	WP_119144555	type VI secretion system protein TssA [Pseudomonas reidholzensis]	MTSLNVELLLKPISEASPTGEESKYEFCYELMELEIKKFGSLFGETVDWKVVETNAIEVLTTYSKDLKAICYLIRALIERNGFEGLEEGLNLLKQNLVLFGTDLYPQRKRARDGAMEWFVAQLETVLPKLDSSTTNWESVTSYLQKINEISDQYYEVFPDSEVEFYLITSVLNGISQRVVGAGETNTDTSRNTVCEPEPLVEETTSTVTEVKTPVQAVTQAPRTVNTVKQEVDIDTDFTSPSASKRTLKKVAEFMLHSDISTPLAYRLHRNCTWCEVDELPPHDNDKKTPLSLAVSQDQLSEYRDKAKQETEAEVIKRLERTLTDAPFWLTGHYLMFQMLTNLDHHEAAEAVKQETQHFISQLEGIELLTFANSIPFADEDTLKWLSSNTASVPVAVAS…
1	1098	GC_00000024	conserved_T6SS	emors_7_1_cat	64414	36.6	38.2	K11907	type VI secretion system protein VasG									45.395	0	WP_117580830	type VI secretion system ATPase TssH [Enterobacter]	MININLSSLIQRLHPITKVALEDAAALAVSERASEVQIEHFLLSLLERPNSDFDQLLAHFECSENLLRQAIKSTLENSHKSNGGKPVFSAMLIEWLQEAWLVSSLDLSETQIRSGALLLTLISNPLRYGQHGYSSLLENINPETLKRNFAELTSRSIESQVATSEQTHAREDGSALSKFTTDFTGKARKGEIDPVFCRDQEIRQIIDILARRRKNNPIAVGEPGVGKTAVVEGLALKIVQGEVPDCLKGVELYGLDMGLLQAGASVKGEFEKRLNAVLDEVKNSPTPIILFIDEAHTLVGGGNQAGGSDAANLLKPALARGEVKTIAATTWSEYKKYFEKDPALARRFQLVKLDEPSTEQAALIIRGLRAVYEKSHNVYVRDDAITAAATLSDRYISGR…
1	1134	GC_00000025	conserved_T6SS	emors_7_1_cat	64414	36.6	38.2	K11904	type VI secretion system secreted protein VgrG									37.455	6.94e-117	WP_002213876	type VI secretion system tip protein VgrG [Yersinia pestis]	MVSDIEFKFEVLGTEHEFRVESFNVVEELSKPFHVSLSLLSLDADITFDELIRKPALLSIFGQGVGTARQFHGVVNEVRYLGEGRRFSRYQITLVPQLWFLTQRQDCRIFQEKSVVDIVTEVLDGAAVTDYRFDISALYQTKEYVLQYRESDSHFVQRLLAEHGLWYYFEHTAANHTMVIVDKNDAIAELENTPLNSSYVGPVIYQADGGGNADREHIFDLESINRVRTGHVTHTDYNYEQPRIPQKMESSGLIDTDLAFFDYPGRYIEPSQGLVRADELMAESIVDNYQIEAASNVMRLIPGYSFILDKHPRRALNRDYTILTVTHSGYDPQVHEDEANEMPTTYQNQFSCLPRDIEFKAPKIAAPVVDGPQTAVVVGPAGEEIYTDKLGRIKVQFHW…
1	1170	GC_00000026	conserved_T6SS	emors_7_1_cat	64414	36.6	38.2															MVRLQLTNSIEVTGAIDENSQAESLACVPRFGKVISLHPTMSDRIYVEFDGLATGSTALAKIGRLFRKSELEFAIESGLTCRIEFLNGDITLPVLTDIFFSLLDDDQPVILRAKSLIIEAENELIVRSGATQTKYSGRDGRVTTQAKYITSQAEKAQKIQGSTIAVN
1	1206	GC_00000027	conserved_T6SS	emors_7_1_cat	64414	36.6	38.2	K11911	type VI secretion system protein VasL									43.387	7.42e-122	WP_011105827	type VI secretion system ImpA family N-terminal domain-containing protein [Vibrio parahaemolyticus]	MLGLKFNMNLSDFARRPISKETPSGINPNSLDNFSEIKREVNKLNTVTSKISWKNVFKLSKNILETESKDIRCACYYTVSATHIDGLKGLVNGLNALLDICVIYWHSGYPDVNKTTARMGAFEWLTEHVIKKQKTLKVSPTDLVLIETGHKLTLKIEEELRSHYGNKSPSLGAIRRIFSQWIEEIQTTNLTLEEQRLKKEAIEKQSNSGINVNVSLPPRDDGKKAVQVQSISHAEKDKNIKPIVTISLAFIFILTLLFGHFFYADNQKSTLLINIQKSDLTTINPLISQLENKDDAVKQYVKTALIEQALHLNKNWETTSTKVNKINELATLNHNLKNLYPDSAAVKKLEHEFNQQRANFENEYSDIHRRFLKSRTIFANAKNHNSDENIVKAYSYSNS…
1	1242	GC_00000028	conserved_T6SS	emors_7_1_cat	64414	36.6	38.2															MSIYQHQYILDSDIVVPTGMNTELAIAIARADIDRFATYEDGNEKYTVASLEFVDQTCLMAKVQETLNVLITPLLDRLHISLKPLPLLLSVPQEISEYDLRNWIDESDFSDYLSNIKFSKNSGNAFLQECLNSLAEPDAIMCIAIDSLYDKKEALISSRDAMSGTNPWGVLPSEGGAGMVLTKRNVLDTLKLIPQSKIVYSQFDWHSSDRRGCARLIRAASKHHDNLGPIYSDMTNERAHTEDYGFAIGARSEVIPYAQQVTLTNEFWGTIGGGSGIATLATMNHLSTVGVLSTAFLFDQNNTRSLFILNREK
1	1278	GC_00000029	conserved_T6SS	emors_7_1_cat	64414	36.6	38.2											30	2.94e-17	WP_138184353	serine/threonine protein kinase [Paenibacillus alvei]	MSELQGSTNDFINQLVVKAIEKKKKNEQTLANKLKPRLEHVLFSQFDVLETIESHNQKTTLYRLAKKDEPEKQICCKVLNSEQPEHIQDMFVAEATHLEVAQHPSIIDFIKLGNEFDRPYFMYKWAEGESVAEKLTRHKYKSFRHDHIAWLIYQLAGALEYIHTKGICHLDIKPSNIIICEDDSIKLIDFGAAQYINDSKEYNEASLSYASPKYIESGKAVPQDDVYSMALLACALFNGYSDNNDWKSLLQQRKRPHTIPKTVWNLLRLVVTKPRTHGLTPISFAQALAHIDINVMQGSHNAPLFTQLRNADLVLRKSSKYDVFRLGRFKYLEASLAACLCLVTFTVLLKSFAFTVADNNAVSLSDTSSRIKPAQAATFLSQPPWEIENALDNNSSDVV…
1	1314	GC_00000030	conserved_T6SS	emors_7_1_cat	64414	36.6	38.2															MNRYRYLVDDVKKTLTDADKQQAMDDIALAQEQLSSFSENMVNFLYTKAILAAETASFYIKQQYRFHQNGYPAKEIDYLTLLDTQLSEIEKVFIALLRIHRGFVYVVYSEYPEVLAWLCLSKNIESQHENDELALLGIGIIDQLDPELAMSLILRSNSDHIHKLLARFIEGGASKRELYYRCLVINQSVSVSLIKHWLEDKKLPEKMLHSYLALMNVGSSIEWLQELTNVDDLLFENLILKEDRATWFRQQYSVDTISSETANTYSKLLTLKEFSLFDIEKEQAVIHFILSGDTELVPLIIEHLMQLDEVDAQLWCEGLFLVYGEEFPFLPSKLGNTIEWQDALHEIVEWQEQIEVVKPVPLRMGQKLTFDASIKAMKSSELSSSLREWLWRELCIMSR…
1	1350	GC_00000031	conserved_T6SS	emors_7_1_cat	64414	36.6	38.2	K19304	murein DDendopeptidase [EC:3.4.24.]									31.154	1.25e-41	WP_116986330	murein DD-endopeptidase MepM, partial [Escherichia coli]	MKLKYLTFISINLAFIILSISLLYFSSNHSDVTNVSQISTSSQKNVSDKEKQKSDNLVINGTINDSFFSSALNAGLTSKQIFSFTEALHNSVNFIDGIEDGTPYSIVLDKDTSHIRSFFYTENNRLHTIQLANNGLYYNELGVNLSSNKLILPTGNLFRISSHFSKKRKHPVVGIVQAHVGTDYATPIGTPVMSVSKGIVSKSEYHPLAGNFITIKHSNGITTRYLHLNDRYVNKGDHVYKGEIIGKTGNSGRTTGPHLHFEYIVNNIPQDFTKLHNDIEMPLNNKNQKKLLKCINLSKTLITKILKEA
1	1385	GC_00000032	other	emors_7_1_cat	64414	36.6	38.2															MKKILLLALFSITLMGCNDPESVAAEAAQLRAEQHPDRTYVGEHNYYTMESSGDIQFTTKKDLKVMYQDFPRYFIEKAKEWPKEDLNDASSYDLPRFQFAWANSSSKDEYESGIKIWSMKTDGTDLRLVTDATIDLTEVRNLTRSPNNRYVAWAGSGGHKSVYDLKTGKVSNMHKFTSPLDMFWSEDSRYLYFDDAINSYARWDSETGEISEIDFQIRTTTANFDGKRMTVLDFGVLVVDANSNEEINWIGVDRSLSMDERSLDVSSIDPEGRYAWGSNPSFGFFFDIEKGTVKQMTTDYTPAQILGKDAHYSALDSFAKVRIVDRVGDRVWSWRAFYYGALSGDAILYNGLANNGLWFKEGK
1	1419	GC_00000033	other	emors_7_1_cat	64414	36.6	38.2							EFF01293	41.421	2.49e-155	NA					MHFNCKLIPSSSLSHKELEYILTPDEYVRLLSREKNSQNIINQLPVQLRQSLSISASKSVQSLLFSLNQKLTKAEWIAVSTTVRKTGVSDTQLAQYPQLKKQIDRVETTQPAKFVKANFKPVTDDVPLVRNLSFTPVEPSPEHKISIEFAGQWPNNAASLLLAKSGEQKEKIAKPRADIHASHRSIATFKDLEPEPRNLYLTIPMNGTPQPLKLLLAENIQPVDKETEMDEWDTVLVPVVPMKRLSEEYSLHQIGYFYVIWNGKVWREITIDSNGYFCDLDIQHERQEPLPTRHVNINASEFFPEANMSFEKFELYQEGQKVFSGELDVCEQSRVFNLVAEEVELKFVDFDHNEILLTTFESPIKNSASNERQAMSYPMPHVWLPYKLLGEVQADCYVY…
1	1452	GC_00000034	other	emors_7_1_cat	64414	36.6	38.2															MSALKTYDHGVYLLGAYFDLQDNGRTKEFRTWHQSSDLSEANDLRNVRPIPFTPVLVDDTETPVLWGTNKDGLLCQLGYFDENAAPETIAKKQTFLRHKAPLTVNELSDNQSYSLTFPPLNVIGQLAEKHTSVKSLNDALIDIYSNKLKLKNKKPIEFTISKIKVSQLAEPYKGFDKPLTDEQNDYNAWYNKIIASEVTEIQGIITPVFHSVGVVFSSDLYVGAEVSLIKVKPKQDNSGETEDVLATSFITKPNPNQEKTDEAKAALPSAVFNFDPTLIDDGYFLLRTRFWVEEYLDKQKEILEEDIEATFPDSVKQGQLQFEAKVKHPESGTVQDVYTYELHEKVTFKPISGFGKLAMVCGDLISLEECLIYQYPTALPSYSDFMIQQGNPVALKGTG…
1	1483	GC_00000035	other	emors_7_1_cat	64414	36.6	38.2															MTYKTSNKLSLFEHYKHQLSAGVFPSAHINFLLSPPPHDKHKKPITLVILTIISVRLKITNRIESAHNKFYKNSMAIQFTSIVESGRFKDRKFARLVLNTILLIIVLMVMTLEILDDYDILDIFNDIQDNIIAFTTLCYMSALYSYGYQLPLFKHQWQVFLILYLTLAQAVYVLGYLTYTQYDQHSIIYLLSYGLFWSLFYGYLIYTINNLKNDIK
1	1513	GC_00000036	other	emors_7_1_cat	64414	36.6	38.2															MNSQYYIFSKTKLEYFPFQQTPKPIVPVEPDLLLEMTFSPKLFIINDIAEKVENLVQHGVEWLDARIDCSPSQPSDEQIKVFENFRMPYIHQTYRLTNEEKQYGKLNWLDFNSVDLDFSRLNNIPLEERLIFKLEEDFGYVFIHESVIELLKKHVKDVWVRDV
1	1591	GC_00000039	other	emors_7_1_cat	64414	36.6	38.2							EFF01536	48.593	5.57e-108	Toxin PAAR-like domain	45.361	1.12e-18	WP_119719572	hypothetical protein [Klebsiella pneumoniae]	MGVTVAANGLSVVHQGSGGEANATLPDVCLTKVGKPIVPIPYGNNAKSADLAKGTTTITMDGGNPVAIKGSTFSKSTGDAGGDKKGVASGTIEAEAEFISASPTVKFEGKGVCRLSDQMTMNKANTMCLGGAQNPSVSLTLEEEGTYTVDLFLSYSDGDPVQGATYKLVDQTGAIFEGNLDTKGKASISGIAPGEFDIEYGEDSREFTPNIPTKENPNYNPNASAQMLIDETKRGEIGFWESSWRKTAGAASWIWGVILGDFNDDATVEQIIANTAITMLPVVDQAADVRDMVANTMTLLNEEERDKPENWLALSLTLIGCIPVFGSAVKGTCKVALKSGKATSKDDLLAIMRAMGKGDPEKFLRTLDWADYAKQTSQIISDVLQPCIEVATELASYAN…
1	1758	GC_00000050	other	emors_7_1_cat	64414	36.6	38.2															MKALTTQSKDKSSLSFLKYKFTNQNQNKPTCRFDIKKSPLLKSQNNNEKLTFMSKKQTPNILQSQFQGLL
1	1779	GC_00000052	other	emors_7_1_cat	64414	36.6	38.2															MKVAYINEKLITSNAMFIASDNRDFLYSDMDFNPTSTQYPIIWEDKSMTSFGVFDITNSGDLSVTAPIAEVFMSFDPYGVEFYPNRLNCADGMSDQIRYIIAIHNEVDVVDIDKSHIEKMVIKYNPEKHGYDIPDEDKKDVIMYRTSRLFLSDEKIQNLPENKKHIFRVKDTEAFFFSEEVYNALYNIAVDGKASGLTAYTFDTNEKAPKF
1	1968	GC_00000077	other	emors_7_1_cat	64414	36.6	38.2															MSIVKKARPSLQDGKKIEKHFLTTKISCPITSHHLISFNLFDKVSSRRKKQINDHKYNRDAHENLILIPSKDKILAKRVACYYGLPWHSSGHTGKNIISHWSNTEPERLERKTANLETEKNADPFAPSNMQSKGNALTKEELQMYNKDIKKLKKTSGYHKVVASLFFTVLKKLKCSQTNVEYQGHLERLSLDICEYISYFELLLSNPGYDFSPNQVGCQEEHCNGRTHETENKAWPSKEDVNFELKIDQRLKLVSEI
1	105	GC_00000001	flanking	emors_7_2	84962	36.9	38.2											47.917	1.71e-27	RGC81918	PTS fructose-like transporter subunit IIB [Hungatella hathewayi]	MKIVAVTACPTGIAHTYMAADVLKKAAAKLGVSIKVETQGAMGVENVLTPVDIVSADLVIIASDIEIEDKNRFLGINSKQFPIETILTDVEGILKKHLF
1	106	GC_00000001	flanking	emors_7_2	84962	36.9	38.2	K11203	fructoselike PTS system EIIC or EIIBC or EIIABC component									61.295	0	WP_117709256	PTS fructose transporter subunit EIIC [Fusobacterium mortiferum]	MDITSLINANVICLDLKSTSKEDILQEMVQILADAGKLSNKTQFLADVWAREEIGNTGFEDGIAIPHAKSSAVLTPSVAIGISRTGIDYGAEDGEPSDIFFMLASTDGDDNQHIEALAQISSRLIEDGFTNKLKKADSKEEILDLFTDIIQPSTESTDIENTPPQTEKSELTRKLGRTKEHLLFGTSHMIPFIVAGGVLLSLSVMISGQGAVPTEGILADIAQMGIAGLTLFTAVLGGYIAYSIADKPGLAPGMIGSWIAVQQYNTGFLGAIIIGFFAGFVVRSLKKIKLPESMASLGSIFIYPLVGTFLTCAAVMWVIGAPISNAMAMLNEWLASMAGSGKIALGAILGAMAAFDMGGPINKVATLFAQTQVNTQPWLMGGVGIAICTPPLGMALATF…
1	190	GC_00000002	flanking	emors_7_2	84962	36.9	38.2	K07001	NTE family protein									30.926	3.41e-100	WP_119143698	patatin-like phospholipase family protein [Pseudomonas reidholzensis]	MRHVFRLNLWFVFLATFLFTPYLYAEPIKEPSRPKIALVLAGGGAKGAAHIGVLKALEELNIPIDIITGTSMGAYVGGLYATGKSVPEIEGYLHTVDWYSGYQDEVGREEKNIRDKKYEDRFAINPSLGIRKEGVKSPKSAIQGQNMLKILRETSGNPVSVASFDDFPIRYRSVATDIVSMEEVVIDHGLLVDAMMASMSVPGALPPYEFEDKLLIDGGVTNNMPVELAKEMGADIVIAVDISSNYMTKEQIGSLFDVASQLTNFMVKRSTQEQTEFLTDKDILLQPRVGDIETTDFSSMPRAYQEGYDTVMTLKSRLKSLAVTPNEYAQYQNKIKQQSANVRLAQGTIIDKVDVENRSHYESDKLARFIQFEQGTWLNSDYIEDKIHSLYATNRFETI…
1	259	GC_00000003	flanking	emors_7_2	84962	36.9	38.2											30.097	1.21e-08	WP_116986099	phosphoenolpyruvate--protein phosphotransferase, partial [Escherichia coli]	MELNTIDYRITFFVKDHGLPPQVASQLTRLAKKFKSLVYIDNITQNRSTNAESSLGLLQVGLCPGDFCQLITVGMDAEWANFVLTDLLSSTFDFVASDKLCDFSETITNTYPQLTPQCEVDFHYVKAQAVLSKFEILKGLSQLIYPKESDELLLALIKREERSSTAMAKQIALPHVISPYVEKPTIAIIRSDYPVDWASKMGDVNVIIALVLPEKPTKEMIMAATYLTRSLLSEDFSQRLVHTRQPKGLQALILYAMCQLL
1	327	GC_00000004	flanking	emors_7_2	84962	36.9	38.2	K01809	mannose6phosphate isomerase [EC:5.3.1.8]	M00114	Pathway modules; Carbohydrate metabolism; Other carbohydrate metabolism	M00114	Ascorbate biosynthesis, plants, fructose6P > ascorbate					62.66	9.76e-175	WP_005478337	mannose-6-phosphate isomerase, class I [Vibrio parahaemolyticus]	MNALKPQTFYPMTNVIQDYAWGSHTSIEALFDIKNNTGKPQAELWMGAHPNGCSAVTVNGDSILLSDLINQDKEAFLSKTTADAFGELPYLFKVLAAEKALSIQVHPNKQQAVDGFEKEEKTGIALTAFNRNYKDNNHKPELVYALTDYKAMNGFRDYQEIVSLFSAMHLPTIASYVDDLAQEPNSNGLQRFFKAILSLENETKERAVAELLDYASSSTDELFVLLQELAIQYPNDVGLFAPLMLNVITLKPGEAMFLSACTPHAYIHGTGLEIMANSDNVLRAGLTPKYMDIDELMSCTEFVSQPLSSLLTQPNTVDGGMSYPIPVNDFKFSVFTATDALTLETNSAEILFAIDSDLTLTHENGESVTVAKGHSVFVPAYAKRYSLTSNGNVARAYN
1	393	GC_00000005	conserved_T6SS	emors_7_2	84962	36.9	38.2											50	4.29e-11	P96156	Chitodextrinase; AltName: Full=Endo-chitodextinase; Flags: Precursor	MIKLNKITAAITSVMFSGYLYAADASATSNVVTFVPGETKVQNGDMVSFNGDCFVAKNNPGIWESPTADSWFWDVAECSGEPNPGPGPNPGPNPTPDPDLGDIIPFIPGKTQVENGDVVSYENQCFIAQNNPGVWETPSASSWFWTLTECSDEPVNPEPEVTELSILAPIAGQVLTANEAISINAHVDGNLAAKVEFWANNTKLAEKTVNQNNTQYSQTWTPSEEGNATINVFVFDKNNQKIEQKSVSVTVKAEVTEDFVAPVVKFVTPANGSTMNVAESLSISVNATDADNDLATLVVKANNKEICSFDAANTDTFACDWQPTQAGNVILNAIATDAQDLSSTATVRITVEEDVVEPPVEPPVTPGDLCKDFNVYPDWTRGDHATGGDIMVHDNIAYS…
1	438	GC_00000006	conserved_T6SS	emors_7_2	84962	36.9	38.2	K11892	type VI secretion system protein ImpK									24.8	1.8e-08	WP_010910863	type VI secretion system protein TssL, long form [Mesorhizobium japonicum]	MSYVEDDVTVVLFQPEPGKPMEVMPAPDLSRNISVSELDISSMGINPLVDQFSWLIASLSCMSSIPWLDDPMPFREQVAREIRKGERMLNEMEVDRASILVIRYCLCAAMDESVCRQEWGANSNWSQNSLLSEFHNETSGGDKFFVILDRLKADPRKYRHVIEFLYLLLQLGFKGKYGRAERGAESLTEIGNTIYRLVRDERLAEQEKVALVDVKSKYLKKPLKRVLPPKLILGVSALLFAAMYAATYLVIDVRFQKLLSLYQ
1	477	GC_00000007	conserved_T6SS	emors_7_2	84962	36.9	38.2											41.22	3.3e-104	WP_011105819	hypothetical protein [Vibrio parahaemolyticus]	MVYVSRCHLFTNKYNACSLITTTRFYIFMRIFSFLKLFAGLGLILLISSCGGESKDTSPPKRETTSVSGILFDAPIAGARVTIWEYANGHLGKKLGDATTSSNGEYSIEVNSGSMPILVQAQGGAYTDPSTNKVVYEGNGKTLKFEATIYFNESKANKVMLTPLSLIAKGLADYKIKLGYDAISAINSANTTISNMYGFDVHTVEPIDIVRRGQSAYVSDGHKYGAYLTAYSSYALDLSKKYSAEEDDDIYTSFTLSELSYRDIAADGLLDGFEIDSISGLRKGISFGKEPITTETYSNNLAQHLLITVNSSLLNVSGTNPKDYEPFAARINSFGTSADPIGVVPPRNETPIDDEVPTTKRTDSDILANIDTIDLLLQDNVGLKGAEAYLQYKDSNGWS…
1	516	GC_00000008	conserved_T6SS	emors_7_2	84962	36.9	38.2	K11906	type VI secretion system protein VasD									26.984	4.76e-15	WP_010910850	type VI secretion system lipoprotein TssJ [Mesorhizobium]	MRKLLTFSLIFLLSGCTMWDQFKESTGITPETSSIELIITADKVLNVREGGQSSPVILRIHELNSPVLFRNLDFFALFENDKDALGDEYIKRYEYQIQPGDVVHETLVLDPATRAIGFSVAFRDINGSSWRKVELIEEKSEYFLKLNLKESELSSNNTRGIEQIYF
1	554	GC_00000009	conserved_T6SS	emors_7_2	84962	36.9	38.2	K11893	type VI secretion system protein ImpJ									33.107	1.16e-83	WP_005463797	type VI secretion system baseplate subunit TssK [Vibrio parahaemolyticus]	MSLYNPVVWQDGMFMKPQHFQQLDRFQGKQSGMLSGFESPLHWGIKRIEINTELLALGKIGITHAEGILQDRTPFDLPLHASLPEVKDVDASVANKVLYLCCPLPSERSELFGTSKDGARYSIHTQDAVDACYDSEEIANITIGKLNFCLMYEDEDKSAYTSIPILKISEVKPDGSIILDNAYIPTCIDINASTVLKKFTTEFASMLRHRAESIVQRLGVVDQQGVSSVSDFMLLQALNRYEPLFWHFANIEGVHPEAFYRVLLQAEGELATLCSSSRRPQEFVPYNHGNLTSCLSTILHNSKVTLSVMSEQRAIPLPLKEQGYGIRIAPISDRSIVESTTFILAVKADVTLDILHTQFVSQTKIGSIDNIRELINLQLPGINIKPMPVVPRALPYHAG…
1	592	GC_00000010	conserved_T6SS	emors_7_2	84962	36.9	38.2											66	3.26e-97	WP_011105828	hypothetical protein [Vibrio parahaemolyticus]	MAKPIQLGFMALIMACSLPAFAKGERYGIAANFKTIESTEYEQGMSGELSTISYGLVHTRPIDENNNRWRWLFGFNYLSDYIEAPANGVYQEVTNYEFRIVPQYALGNWWAFTPYVGAGLSLGYSQYGNRWKVDDEGYKYGNQLDDIDQFEVGAVLSFGTVIKLGSNPDAHLQIIPQASYIQPIYNDGLGGLELSVSLLF
1	630	GC_00000011	conserved_T6SS	emors_7_2	84962	36.9	38.2											39.706	0.000475	WP_117539334	FHA domain-containing protein [Coprococcus catus]	MHLNQLTLFITKSPEEYTGSKHIEMPESGGSLGRNPSNTVSLVDHNRFISGSHCLISIYGDTYYLSDVSTNGTLVNGNKLLKNQPISLYDGDTIVLGRYEISVGLEKLSNSVNIAADISEETDSTDPLVNLAEYTPDEEQDKGNIADLFKETRIDKVDSSDPVAHLNFITQTNNDDHLLHGNEKKYEQKITEPVHTRQLLDDSDSVHSEFDVPNLIPEDWFSNDLANTSMPPVQIDEPIATSSESESESESEPMVHSFVDSTPETIIPSVTEQLAWEDVTQTIQPSVSTTEPKSDEFFIAPSTSMDVYPSQSIETPFNSKMSDDAASAFYKGLGMSASQIEQTDEQFFQQMGNCLRLCINNLQKELSELKAIKNNEQDDSMTNIVELMLSLNHQQLLSP…
1	667	GC_00000012	conserved_T6SS	emors_7_2	84962	36.9	38.2											30.882	1.68e-20	WP_116949140	Lrp/AsnC family transcriptional regulator [Jiangella endophytica]	MSNMNLQGLDKLDRRIISNLLSNGRESIANLSRNVGLSRTAVAERINRLEKTGIIKGYTAQIRMGNKDENASSYLLISCNKGQKDSVSDGLKEIPEVKMTSIVGGTYDIICLIEAPDLHRIHYLCSEIESLSGIKEVKNTIVLHQPVCR
1	703	GC_00000013	conserved_T6SS	emors_7_2	84962	36.9	38.2	K11901	type VI secretion system protein ImpB									40	2.67e-32	WP_117580760	type VI secretion system contractile sheath small subunit [Enterobacter]	MSRDGSVAPKERINIRYVPATGDVQEDVELPLSMMVVGDFTARTDETPIEDRTPINIDKDNFNDVMEGYSPNVKVNVDNKLSDEEGAQLGVDLTFNSMKDFSPEAIAKSVPELNGLLELREALVALKGPLGNVPAFRKKIAAVLQDEEARQKLLEELNIGSAKEEAKAE
1	739	GC_00000014	conserved_T6SS	emors_7_2	84962	36.9	38.2	K11905	type VI secretion system protein													MEKGYRLLERIELGEPKNCYEKVVSHKHLIESIHLHLADLLNTHAGNAMIDNDYGLPDFNDVLSNNTNLVRNIQQNIKVSIEKFEPRMRNVEVHYRHDNNNPLQLGFGIGGEVIHNGGKVPMAINIFMGVDGQFNV
1	775	GC_00000015	conserved_T6SS	emors_7_2	84962	36.9	38.2	K11900	type VI secretion system protein ImpC									60.288	0	WP_117611541	type VI secretion system contractile sheath large subunit [Escherichia coli]	MTAEAQAPEQEAALVESGSLLDSILNETRLKPSDEGFDVAKRGVEAFIGELLSTNTSDKVDQSLVDLMISEIDQKLSKQVDAILHNEEVQAIESTWRGLKYLVDHTDFRENIQIELISAKKDEVLDDFEDAPEVVKSGLYKQIYTREYGQFGGKPVGAVICDFQMSASSPDIKLMEYMANVGAMSHAPFITSASAKFFGLDSYEELPNLKDLKSVFEGPQYTKWRGFREHEDARYVGLCTSRMMLRTPYSVEDNPIKAFDYNEHVKDGHDNYLWGNSAYAMASKISESFAKYRWCPNIIGPQSGGTVSDLPVYNYESMGQIETKIPTEILISDRREYELAEEGFIALTMRKGSDNAAFFSANSVQKAKVFPNTPEGQQAEMNYKLGIQLPYMFIINRLA…
1	811	GC_00000016	conserved_T6SS	emors_7_2	84962	36.9	38.2	K11903	type VI secretion system secreted protein Hcp									51.163	4.3e-64	WP_137712216	Hcp family type VI secretion system effector [Brenneria rubrifaciens]	MPTPAYMSIKGETQGDITKDAYSADSVGNVWQEAHVDEFLVQELDHVLTVPRDPQSGQPTGQRVHRPVVVTKQQDRCSPLLFNALVSGEKLPECSINFYRTSTSGKQEHYYTIKLIDALLVDMQTRMAHCQDAAMADRVTEEVLKFTYRAIEVTHETCGTAGNDDWRTPREA
1	847	GC_00000017	conserved_T6SS	emors_7_2	84962	36.9	38.2											45.455	1.24e-07	WP_117031792	DUF2169 domain-containing protein, partial [Klebsiella pneumoniae]	MQLWDIDSESPFTLKGRFQRDSEGHEVWVLSMKRAWTFLDGSWSEEVDNLELNDDPIYLGEPGFSAMVADHDFPIYKKNTDVLIYGKARSYAKKPVHSQLCRVLIDEHIDKTLKVVGERHWVDHSGSITVSMTQSFIERDIDYSNAIGGDERNRIGGGAAETNTELLKAKVPSIFYPDQNWQASSKKVKVAGFGPMPPFFHDRAKWAGTFDEKWFEERRPVWPIDFDARFYQSAPQDQQCNGYLQGGERLMVSGFCHNDALSFRIPSEKFQAVAVFNGKEEKINMPMYTLWIDTENKRIEATYTAAFPCQNREHLLTSSYLVELS
1	883	GC_00000018	conserved_T6SS	emors_7_2	84962	36.9	38.2	K11895	type VI secretion system protein ImpH									32.344	1.25e-54	WP_000348794	type VI secretion system baseplate subunit TssG [Escherichia coli]	MIQYIVNKPCDYSFFQAVSLLEKHYQNLSGIEYKAIGENQYVKNEYIQFSVSPKLSFPKSDIEFITEFERNDATYTQIEVNFMGLHGVSSPLPASYTEKLAGRDPDDNPVKEFFDFFHHRYISMLYRVWKKYRYHIQYKSDAKDPFSGRLLHLVGLSSVIQESNEVDLDRAKLLSYVNQLSTRTRSPKLVSGIVSHYFSLSNVYIEEWVYRRITIAASQRNCLNRKNCQLGGDFHLGQSMADLTGKFNLCIDDIDFDTYVKFLPGGALHETLIGLMKFILCDPMAWDLKLTVRNKSLPINQLGDGLGNELGQTFWLGAAKGEETKIKIVGSN
1	919	GC_00000019	conserved_T6SS	emors_7_2	84962	36.9	38.2	K11914	sigma54 dependent transcriptional regulator									42.462	3.92e-78	WP_126397535	sigma 54-interacting transcriptional regulator [Blastochloris tepida]	MSLAKSDNLNNALLAISQSLADRSQLALTLDAILAAARQLTFADHGIIYVLDQTGQALLPSVVHHNEHILAEHPWQPLTLESIDETDPFSFAIQNGEVVLINDLYQYNGYQCDEIYQNESILNCQSKNLLAWPLIDNEKNTVGLLVLFDLNVINDEASLTCFCQMAATNIRQAVWLEKYGYMIKELSEDNASLTRENNQLKQRKQSQYSGPIAESEVMLNALARLDKVLSLPVDVLIRGETGVGKEVIAKYIHENSNRSKQALIVQNCAAIPEQLLESELFGHKKGAFTGADKDKIGLFEAADGGTLFLDEIGDMPLLLQAKLLRVLQERKFRPIGGNKEISVDVRVLAATHANLMEKIKKNEFRADLFYRLNVFPITIPPLRERTEDIIPLSEHFIKL…
1	955	GC_00000020	conserved_T6SS	emors_7_2	84962	36.9	38.2															MKPYLLLLPAALVVAGCSNQTSVPDPLAPYKNVHIIGNKKQSIGSFNYLSKDVDGYTDKQVIVYFNEIPFTSTFNLCADKGVYIANCKSTVSIFPSKNKGVIFNYDLNFYNGSYPARVGSMNILLPSTTTRKMDNLTQYTSAKFSEEQFLESEKLEEATFILMKSS
1	991	GC_00000021	conserved_T6SS	emors_7_2	84962	36.9	38.2	K11891	type VI secretion system protein ImpL									22.985	1.56e-68	AFJ27267	IcmF-like protein [Escherichia coli Xuzhou21]	MIKNTLARTPLILSTVISAFFALLLVGVYYLWFNQADLRLLWGMLGVIFTIYAIFNLTLYIKKRKNKNHQSIETEEDTLSMVLRPLLHKAGKKPVYLILGNKGAGKNQFLNVSNAIKPMDKVKNVKNDFFEWSESDSAVYIKPNHRLTFQEISSNDSLLWDALINEVIKHKPRKPFAGCMLLIDFEFLIVHDDEQTDYTLNALLQRLESIKETTGATLPLYLIMTKLDKLEGFKEYIHFSPLKSSVEFLTIPLKDAKGAILDYFRDSYKNIVKVMESNALDSSSYTNTPDEKQTILAFPKQFELCEKEISRIIERLNELNQGTYSVDIREVFFSSSLQGGRKYNLLAKSCSNYFNLPIIASEHGQLTETPYFTRFLVDAKVLPESDYSAENQHYLKRIQ…
1	1027	GC_00000022	conserved_T6SS	emors_7_2	84962	36.9	38.2	K11896	type VI secretion system protein ImpG									32.414	1.34e-91	WP_117681754	type VI secretion system baseplate subunit TssF [Klebsiella pneumoniae]	MSNSKYFQDELTYLKEAGSEFAKYHPKLTHFLSEGTFDPDVERLLEGFAFLTGRVREKIDDELPELTQSLISLLWPHYMRSVPSMCISELVPHSGSVTEKIIVERGAEMASEQVEGTQCQFRTCYDVALYPLSIQQIEQNNSRTNSSLHLTIAANNGLELSRIKLDTLRFHLHGEQHITRSLYLWLFRYLEYVELDVGGGYKHRLRADQVVPVGFGDDEGILPYSKNSFSGYRLLQEYFSLPDKFMFFDLKGLEWLSGIPQRSTVKISFAFSRALPSEVIVKNKHFKLHCTPSVNLFEKDGDPIRLDHQLNEYKVRPQSSNQEHYEVYSVESVESWSKTERCRKKLIEFESFEHQINQKDKRDFYKTKVNERINGRGLERYISFHSHNNQVSELGSETV…
1	1063	GC_00000023	conserved_T6SS	emors_7_2	84962	36.9	38.2	K11910	type VI secretion system protein VasJ									24.104	3.23e-24	WP_119144555	type VI secretion system protein TssA [Pseudomonas reidholzensis]	MTSLNFESLLKPISEVAPTGEESKYEFCYELMELEIKKFGSLFGETVDWKVVETNAIEVLTTYSKDLKAICYLIRALIERNGFEGLEEGLNLLKQNLVLFGADLYPQRKRARDGAMEWFVAQLETTLPKLDTSTTNWESVASYLQRINEISDQYYEVFPDSEVEFYLITSVLNGISQRVVGAAETNTDTSRNTVCEPEPLVEETTSTVTEVKTPVQAVTQVPRTVNTVKQEVDIDTDFTSPSASKRTLKKVAEFMLHSDISIPLAYRLHRNCTWCDVDELPPHDNAKKTPLSLAVSQDQLSEYRDKAKQETEIEVIKRLERTLTDAPFWLTGHYLMFQMLTNLDHNEAAEAVKQETQHFISQLEGIELLTFANSTPFADEETLKWLSSNTTSTPVAVAA…
1	1099	GC_00000024	conserved_T6SS	emors_7_2	84962	36.9	38.2	K11907	type VI secretion system protein VasG									45.504	0	WP_117580830	type VI secretion system ATPase TssH [Enterobacter]	MININLSSLIQRLHPITKVALEDAAALAVSERASEVQIEHFLLSLLERPNSDFDQLLAHFECSENLLRQAIKSTLENSHKSNGGKPVFSAMLIEWLQEAWLVSSLDLSETQIRSGALLLTLISNPLRYGQHGYSSLLENINPETLKRNFAELTSRSIESQVATSEQTHAREDGSALSKFTTDFTGKARKGEIDPVFCRDQEIRQIIDILARRRKNNPIAVGEPGVGKTAVVEGLALKIVQGEVPDCLKGVELYGLDMGLLQAGASVKGEFEKRLNAVLDEVKNSPTPIILFIDEAHTLVGGGNQAGGSDAANLLKPALARGEVKTIAATTWSEYKKYFEKDPALARRFQLVKLDEPSTEQAALIIRGLRAVYEKSHNVYVRDDAITAAATLSDRYISGR…
1	1135	GC_00000025	conserved_T6SS	emors_7_2	84962	36.9	38.2	K11904	type VI secretion system secreted protein VgrG									37.276	2.03e-117	WP_002213876	type VI secretion system tip protein VgrG [Yersinia pestis]	MVSDIEFKFEVLGTEHEFRVESFNVVEELSKPFHVSLSLLSLDADITFDELIRKPALLSIFGQGIGTARQFHGVVNEVRYLGEGRRFSRYQITLVPQLWFLTQRQDCRIFQEKSVVDIVTEVLDGAAVTDYRFDISALYPTKEYVLQYRESDSHFVQRLLAEHGLWYYFEHTTANHTMVIVDKNDAIAELENTPLNSSYVGPVIYQADGGGNADREHIFDLESINRVRTGHVTHTDYNYEQPRIPQKMESSGLIDTDLAFFDYPGRYIEPSQGLVRADELMAESVVDNYQIEAASNVMRLIPGYSFILDKHPRRALNRDYTILTVTHSGYDPQVHEDEANEMPTTYQNQFSCLPRDIEFKAPKIAAPVVDGPQTAVVVGPAGEEIYTDKLGRIKVQFHW…
1	1171	GC_00000026	conserved_T6SS	emors_7_2	84962	36.9	38.2															MVRLQLTNSIEVTGAIDENSQAESLACVPRFGKVISLHPTMSDRIYVEFDGLATGSTALAKIGRLFRKSELEFAIESGLTCRIEFLNGDITLPVLTDIFFSLLDDDQPVILRAQSLIIEAENELIVRSGATQTKYSGRDGRVTTQAKYITSQAEKAQKIQGSTIAVN
1	1207	GC_00000027	conserved_T6SS	emors_7_2	84962	36.9	38.2	K11911	type VI secretion system protein VasL									43.357	4.11e-123	WP_011105827	type VI secretion system ImpA family N-terminal domain-containing protein [Vibrio parahaemolyticus]	MLGLKFNMNLSDFARRPISKETPSGINPNSLDNFSEIKREVNKLNTVTSKISWKHVFKLSKSILESESKDIRCACYYTVSATHIDGLKGLVNGLNALLDICVIYWHSGYPDVNKTTARMGAFEWLTEHAIKKQKTLKISPTDLLLIETGHKLTLKIEEELRSHYGNKSPSLGAIRRIFSQWIEEIQATKLSLEEQRFKKETILKQNNSGINVNVSLPPRDEGKKAVPSITQSEKDKNTKPMVTISLAFIFILTLLFGHFLYADNQKSTLLINIQRADLTTINPLISQLENKEDSLKQYVKTALIEQALHLNKDWEVTSTKVDKINELESLNHSLKNLYPDSAAVKKLGHEFDQQRANFENEYNDIHRRFLKSRTIFANAKNHNSDENIVKAYSYSNSLF…
1	1243	GC_00000028	conserved_T6SS	emors_7_2	84962	36.9	38.2															MSIYQHQYILDSDIVVPTGMNTELAIAIARADIDRFATYEDGNEKYTIASLEFVDQTCLMTKVQETLNVLITPLLDRLHISLKPLPLLLSVPQEISEHDLRNWIDESDFSDYLSNIKFSKNSGNAFLQECLNSLAEPDAIMCIAIDSLYDKKEALISSRDAMSGTNPWGVLPSEGGAGMVLTKRNVLDTLKLIPQSKIVYSQFDWHSSDRRGCARLIRAASKHHDNLGPIYSDMTNQRAHTEDYGFAIGARSEVIPYAQQVTLTNEFWGTIGGGSGIATLATMNHLSTVGVLSTAFLFDQNNTRSLFILNREK
1	1279	GC_00000029	conserved_T6SS	emors_7_2	84962	36.9	38.2											30.526	2.05e-17	WP_138184353	serine/threonine protein kinase [Paenibacillus alvei]	MSELQGSTNDFINQLVVKAIEKKKKNEQTLANKLKPRLEHVLFSQFDVLETIESHNQKTTLYRLAKKDEPEKQICCKVLNSEQPEHVQEMFVAEATHLEVAQHPSIIDFIKLGNEFERPYFMYKWAEGESVAEKLTRHKYKSFRHDHIAWLIYQLAGALEYIHTKGICHLDIKPSNIIICEDDSIKLIDFGAAQYINDSRKYNEASLSYASPKYIESGKAVPQDDVYSMALLVCALFTGYSDNNDWKALLQQRKRPHTIPKTVWNLLRLVVIKPRTHGLTPISFAQALAHIDISVMQGSHNAPLFAQLRNADLVLRKSSKYDVFRLGRFKYLEASLAACLCLITFTVLLKSFAFTVADSNAVSLSDTSSRIKPAQAATFLSQPPWEIENALDNNSSDVV…
1	1315	GC_00000030	conserved_T6SS	emors_7_2	84962	36.9	38.2															MNRYRYLVDDVKKTLTDADKQQAIADIALAQEQLSSFSENMINFLYTKAILAAETASFYIKQQYRFHQNGYPAKEIDYLTLLETQLSEIEKVFIALLRIHRGFVYVVYSEYPEVLAWLCLSKNIESQHDNDELTLLGISIIDQLDPELAMSLILRSNSNHIHKLLARFIEGGASKRELYYRCLVINQSVSVSLIKHWLEDKKIPEKMLHSYLALMNVGSSIEWLQELTNVDDLLFENLILKEDRATWFRQQYSVDTISSETANTYSKLLTLKEFSLFDIEKEQAVIHFILSGDTELVPLIIEHLMQLDEVDAQLWCEGLFLVYGEEFPFLPSKLGNTIEWQDALHEIVEWQEQIEVVKPVPLRMGQKLTFDSSIRAMKSSELSSSLREWLWRELCIMSR…
1	1351	GC_00000031	conserved_T6SS	emors_7_2	84962	36.9	38.2	K19304	murein DDendopeptidase [EC:3.4.24.]									34.199	5.2e-41	WP_116986330	murein DD-endopeptidase MepM, partial [Escherichia coli]	MKLKYLTFISINLTFIILSISLLYFSSNHSDVTNGSQFSTSSQKNVSDKEKQKPYNLVINGTINDSFFSSALNAGLTSKQIFSFTEALHNSVNFIDGIEDGTPYSIVLDKNTSHIRSFFYTENNRLHTFQIANNGLYYNELGVNLSSNKLILPTGNLFRISSHFSKKRKHPVIGIVQAHVGTDYATPIGTPVMSVSKGIVSRSEYHPLAGNFITIKHNNGITTRYLHLNDRYVNKGDHVYKGEIIGKTGNSGRTTGPHLHFEYIINNIPQDFTKLHNNIEMPLNIKDQKKLLKCINLSKTLITKILKES
1	1386	GC_00000032	other	emors_7_2	84962	36.9	38.2															MKKILLLALFSITLMGCNDPENVAAEAAQLRAEQHPDRTYVGEHNYYTMESSGDIQFTTKKDLKVMYQDFPRYFIEKAKEWPKEDLNDARSYDLPRFQFAWANSSSKDEYESGIKIWSMKTDGTDLRLVTDVTVELVNGIKNLTRSPNNRYVAWADLGGYKTVYDIKTGKVVELSISMSPLAMLWSEDSRYLYFERARDLFSRWDSVTGEVSKVDFDIETSAVSYGGNRIVVYPFGVTVFDSITNEKKLLIDVDEKLPFKEARMTVRSIDPTGHYAWGSNPSFGFFFDIEKGTVKQMTTDFTPAQILGKDAYYSALNSFAKVRIVDRVGDRVWSWRAFYYGTLSGDAILYNGLANNGLWFKGDK
1	1420	GC_00000033	other	emors_7_2	84962	36.9	38.2							EFF01293	41.594	2.22e-154	NA					MHFNCKLIPSSSLSHKELEYILTPDEFVRLLSRGKNSQSIINQLPVQLRQSLSISASKSVQSLLFSLNQKLIKAEWIAVSTTVRKTGVSDTQLAQYPQLKKQIDRVETTQPAKFVKANFKPVTDDVPLVRNLSFTPVEPSPEHKISIEFAGQWPNNAASLLLAKSGEQKEKIAKPRADIHASHRSIATFKDLEPELRNLYLTIPMNGTPQPLKLLLAENIQPVDKETEMDEWDTVLVPVVPMKKLGEEYSLHQTGYFYVIWNGKVWREITIDSNGYFCDLDIQHERQEPLSTRHVNINASEFFPEANMSFEKFELYQEGQKVFSGELDVCEQSRVFNLVAEEVELKFVDFEHDEILLTTFESPIKNNASNERQAMSYPMPHVWLPYKLLGEVQADCYVY…
1	1453	GC_00000034	other	emors_7_2	84962	36.9	38.2															MPALKTYDHGVYLLGAYFVWKRRGQSESFPDWNKDASSDLTKEADLQNVRPIPFTPVLVDDVENPVLWGTNKDGLLCQLGYFDENTVPETVAKKQTFLRHKAPLTVNELSESQSYSLTFPPLNVIGQLAETHTSVKALNDSLKDIYSTKLLPEKPDLTQFAISKIKVSQLAEPYKNESDKPLTDEQNDYNDWYDKIIASEVKEIQGIITPVYHSLGVVFSSDLYVGAEVSLIQVKSKQDSSGEVEKVLATSFVTKEAPKKTQTQEEQEDLKKILPSAVFNFDPKLIDDGYFLLRTRFWVEEYLQKQQEFLGEEVKAKFPDSVKQGQLKFETHIEHEESRTVQDVYTYELHEKVTFKPVSGFGKLAMVCGDLISLEECLIYQYPTALPSYSDFMIQQGNP…
1	1484	GC_00000035	other	emors_7_2	84962	36.9	38.2															MNTINTSSLAGVFPSGHINFLPPTSYDKHKKPITLVILTIISVRLKITNRIESAHNKFYKNSMAIQFTSIVESGRFKDRKFARLVLNTIILIIVLMVMTLEILDDYDILDIFNDIQDNIIAFTTLCYMSALYSYGYQIPLFKHQWQVFLILYLTLAQAVYVLGYLTYTQYDQHSIIYLLSYCLFWSLFYGYLIYTINNLKNDIK
1	1514	GC_00000036	other	emors_7_2	84962	36.9	38.2															MNNEYHILSKSVFSQFLFQQTPKPIVPVGPDLLLEMTFSPKLFIINDISEKVENLVQHGVEWLDARVDCSPSQPTDEQIKVFENFRMPYIHQTYRLTNEEKQYGKLNWLDLNSVDLDFSRLDNVPLEERLLFKLEEDFGYVFIHESVIELLKKHVKDVWIRDV
1	1542	GC_00000037	other	emors_7_2	84962	36.9	38.2															MCKQTNYSKYQKRVIKFLNDLLGADTPFTYERANNNHLKVLIDGVTKPLFTGSTPSDCKSINNFMAEVKRELKASKKEESKLSQPEKTGVVSAITLSNDKLIQNCVKSLRTRITVLKEQEKESVLNNKCINGLNLKRIEIVKHSVSLALQARKQGTYLKPKELRTIEGMVHNHLNFMLPSMAYYAELLNSTSKDKLAKVQPNKQQASVHNESNKNNVISLEDKTQHAPIKEAKKLAKKPKQPVSNKNMNTKNSNSATELMAMSANNRVSLLRNLTKAQALMLIDDINQAMAANREEDIEAVIALIRDKDLPLDAIISRMEAA
1	1568	GC_00000038	other	emors_7_2	84962	36.9	38.2	K19135	CRISPRassociated protein Csx14									30.132	2.5e-20	WP_116935424	CRISPR-associated ring nuclease Csm6 [Verrucomicrobia bacterium]	MKNILIAVTGASPQVLTETIYALHTQGKPMPEVVYVITTENSKQTLKEGLFIQGYWDKLMADYQLPPIAFNSDHIWVITDDNGNALVDAKGVDDQSIMADFITRKVALLTQDNEVAIHASIAGGRKTMAFYMGYAMSLYGREQDVLSHVFVDDEFEFVSDFYYPTPVDCFIQGKQGEAINAKEATVTLAEIPFVRMRRQVDECIINQMETHSFSKTVSALNSANNTQVRVSISTKEKTVEVAGVKIPLTSKHLAIYLFFLSKDSRKATLDRYFEDDKTQTTDYLGVLDKMKADVRLYKTMGLEDEGQWRQKDHAELATLTKDFVRQSLNGLHKSLKDKLVPDLFEKIKVHSDGVKSGATYQISTEVLFICDDIEL
1	1616	GC_00000040	other	emors_7_2	84962	36.9	38.2															MNYSVITENYFSAKTSFSCIDSREMLYSKNNYEPTSSINPIVWEDSNGLIKDITHIIDNGDLCVSEEFAQLIMSFDPYGIETYPAKLILSDGTIEKRYILALNNIIDVMDREKSITEISPKRNKILVQALYLQKKNY
1	1668	GC_00000043	other	emors_7_2	84962	36.9	38.2	K19147	5methylcytosinespecific restriction enzyme subunit McrC									38.292	5.12e-73	WP_117455722	McrC family protein [unclassified Firmicutes sensu stricto]	MKAKKEITLFEFGFVAKDDRAEAHSRVQKVSASSYDYLKRMCLGDESDRKLLKLRSLDGMEVLQVQNYAGVIFTPDKTQIEVLPKIGKSANEIEGEEQARTSLLTMLRALKGFSHIQTASANITHQKMPLLEVFIGQFLHSVNTLVKRGLRSDYVRREDNLAYLKGKLNVGKQLRHNFINKHKFYCEYDEFLLDRPANRLIHSALLNVKSLARSVANQKLAQELAFVFHEVPKSHDHKSDFSKVKSGRGMNHYDVPLQWCQLILNGYSPQTMKGDHHAISLLFPMEKVFEDYVAKIIKAELAQSHPTLQLETQATGEHLARYQQKGKFSLRPDLLIKHDKRNVAVLDTKWKLLDSKISNANLSQSDVYQMFAYAKKYLKRNADEQHGNDVVLIYPMQAN…
1	1816	GC_00000056	other	emors_7_2	84962	36.9	38.2	K01154	type I restriction enzyme, S subunit [EC:3.1.21.3]									54.248	1.65e-58	RGI32539	restriction endonuclease subunit S, partial [Ruminococcus sp. OM07-17]	MSSLPKGWVECELKQLISITSGKNLTQKKMIEGTTPVFGGNGITGWHNEGNVFKPTIVIGRVGFYCGSVYITPENAWITDNAFITSFSEDHIDREFIYWLLKFTDLRQNDSSSAQPVISGQKVYPIQVKLPPLAEQKRIVEKLDEVLAQVDTIKARLDGIPSLLKRFRQSVLASAVSGKLTEEWRISNEINLPVQKKLGDVITKIGQGWSPKCENTPAEDGDWGVIKTSSVQNISFLEYENKTLPQSLEARPEHELLAGDILTTRAGPRVRCGVTAYVSETRSHLMICDKVYRYRVKESDGFSKYLVYVLNSPFYLGEIEKMKTGISDSGMNLTQTKFKQLSLLWPFIEEQKEIVRLVDQYFAFADTIEAQVKKAQARVNNLTQSILAKAFRGELVPQD…
1	1919	GC_00000069	other	emors_7_2	84962	36.9	38.2	K01153	type I restriction enzyme, R subunit [EC:3.1.21.3]									70.458	0	AAA97247	CG Site No. 620; alternate gene names hs, hsp, hsr, rm; apparent frameshift in GenBank Accession Number X06545 [Escherichia coli str. K-12 substr. MG1655]	MQKSNFEFLKGVNDFLYAIARAAENNFPDDPNTTLVKVRIFGEATAKHLAKLLDIEAPDNQHELLRELGKIPFVDDSILTVFHKLRKIGNKAVHEYHNDLQDAEMCLRLAFRLAIWYYRLVTKQFDFAVPVFILPSSENKAQFEQEMHSLKQELLLVRQGEAQTKAEVAAQNAKLTALTGYISVLESKQEETQGQTQERIAALEAQLQRKDEEIAKKTEAERKAYKKQITDQAASRSLDLSESESRYLIDNQLRKAGWDADSKLLSFANGTRPQIGRSIAIAEWPTGKDETGKTGFADYVLFIGLKAIGVIEAKKANKDVVAKLSEAYRYSKYFDNDFLRNELQHAANDQTALDQIAESLPTYLPTWSDSSNSEPYKIPFCFSANGRAYRSAIKTKSGI…
1	1926	GC_00000070	other	emors_7_2	84962	36.9	38.2	K03427	type I restriction enzyme M protein [EC:2.1.1.72]									49.419	1.6e-162	WP_117017508	type I restriction-modification system subunit M [Aeribacillus pallidus]	MNNNDLVAKLWKLCDNLRDGGVSYQNYVNELASLLFLKMCEETGQEDDLLPEGFRWADLKAKIGQEQHQFYRNMLVQLGADDHAIVRAIFQNVNTTITQPAQLTELVSNMDSLDWYSDEGGDKGKSRDDFGDMYEGLLQKNANETKSGAGQYFTPRALISTIVNVMQPQPREIIQDPAAGTAGFLIEADKYIKSNTDNLFDLPDEDQEFQMKKAFVGLELVPETRRLALMNCLLHDIEGDENEGAIRLGNTLGSAGENLPKANVILTNPPFGSASSSNITRTFVHPTGNKQLCFMQHIYDALEPGGRAAVVIPDNVLFEGGKGTDIRRDLMDKCNLHTILRLPTGIFYAAGVKTNVLFFQKGTPENPNQDKGCTKETWVFDMRTNMNTFGKRRPLTEKH…
1	2019	GC_00000087	other	emors_7_2	84962	36.9	38.2							EFF01461	51.534	1.2e-175	Toxin PAAR-like domain; nuclease	25.141	1.4e-20	WP_117111992	hypothetical protein [Klebsiella variicola]	MDAVFPITQRNGEVFHTLSDFKQLFESVKNGRYILSQGNGWHSGVHLTTKMVPWGKGIRPIQAMLSGNIVAYRINSEYLKSTYQEQELSFSNNFVLVEHIAKSPNSNEVADFHFYSLYMHLAPPCDIGANSSVTTRYRLLKARNVRTFKFDAEPERSKKNKTITLPTDSVLEYLYADENQTKPYTIGSKTYHNIKCRVISLGNNTDKEVNSLKGKMVWFASGLNSPFDILNNPEIVSKEPMSEPEWMSHPLAQIRDGSVQVIKVAKTDHSPLSKAIIPIKAGDDIGYMGLHEYSQDTHATKKEDNRVHIEIFSIDQPPEFFLKSIGAKNATMSGFTLIDGSSSSGALDESNTFFQEIASKVTEENKDGTKIDFSTYTPKNLKAYLNTKQEKFEKLIVKH…
1	2020	GC_00000087	other	emors_7_2	84962	36.9	38.2							EFF01888	41.837	7.43e-19	NA; Lysozyme-like	37.5	1.36e-09	WP_117663183	glycoside hydrolase family 19 protein [Prevotella]	MFLFLQIKTTIQITGRDKYTAFTAYHNSKNIDVQQDFLINPELIADSLDYATSSAFYFWYKFKKINDEFSSSASVIDITKKVNGGTNGLKDREKRYKMMKIIL
1	2085	GC_00000103	other	emors_7_2	84962	36.9	38.2							EFF01536	68.866	0	Toxin PAAR-like domain					MGVTVAANGLSVVHQGSGGEANATLPDVCLTKVGKPIVPIPYGNNAKSADLAKGTTTITMDGGNPVAIKGSTFSKSTGDAGGDKKGVASGTIEAEAEFISASPTVKFEGKGVCRLSDQMTMNKANTMCLGGAQNPSVSVTPEEEGTYTVDITCKYPNGLAYANAPFELKDSQGGILGGGILDSNGKASCSGLPPSECSLILKESNDSYSPIASLIANQPSELYEDPQDFCTFIAGRRAPFWETKIGVNSDWGILISPSLSDDDFKNMVFEQSRLLSPFSISLNHSNDFANAFISALFHIKEDRETLQKYESLLELLFEQVHESGDILRILFQADITEPPAELLAQLRYLGSGNTANYIQTMLWTMINKQICSHLDELITALNERLDYILLQAQTHSFSG…
1	2135	GC_00000128	other	emors_7_2	84962	36.9	38.2	K07452	5methylcytosinespecific restriction enzyme B [EC:3.1.21.]									59.101	0	WP_116971001	AAA family ATPase, partial [Escherichia coli]	MTFSEEFLDLIKTYEIDTTHLDASFSEVENKLNALNDCSKEHLLKKYTSFLQFVGDKKGVAYTKVHHGGAIFFAQSYGGTQANQAFGGFYFQKNGNISCEFVFTNLKQDEKAVIPESLKGQKYPWVLVTNEALSKDAQALGEKWLKVKAGVIGQMNERLIDSDKANFNESHEIEAPLNQILYGPPGTGKTYKLQKLQSNYTNDSEVASYDQWLSAKIENLSWMETIALILLDLGEATKVAQIIRHEFFQKKALINGRTIESLNATAWSSLQKFTIPESETVNYKNRSEPAIFDKTPDSKWLIVEDKKALVSELISLQKEIKTGPSEVEPVKRYTSITFHQSYGYEEFIEGLRANSTEDGAISYSIEAGEFIKLCRRAEQDPTNQYAIFIDEINRGNISK…
1	2147	GC_00000135	other	emors_7_2	84962	36.9	38.2											29.5	3.57e-11	WP_117830239	flagellar motor protein MotB [Roseburia sp. TF10-5]	MKDKPNEWVAISDLMSGVMAIVMLFFIVSSLKGAVDKVKMINEINEIKNQLIEKADREKKLEILVAQYGGQLSEYDQSIKLSAEQQQKLVEMLHNLEGSLSSDFNKNLIHFNIDEAKITLKDNVFSRGSACITNSAQDVVPGLNQMIEKFLKQFPLGRVYIEGHTDNLPVKYPVIDFKRFCTVYDDNYTLSAARARETRKLLLNDKNKESQNRIVVAGFGDSHPIDGIEPSDARNRRVEVRFVLDTQL
1	2153	GC_00000141	other	emors_7_2	84962	36.9	38.2															MGLFSGFCDFVSSAASTISSAVSSAWEGAKSVAKSAISWIAEKAETVVDSVKKVWKTVKPYIPKIRKALKAAAEVAPWPWLRSGLLLLEKGLFFIENFENTALGKKVIKAVNRVIKMAKDIYSTFFNDEEMKAAKERDDLFKEAQKAAEGNTEAEKTIALAKMLNAYGIINREVYDLLTERSELLSFEHYLRLRATQKLLLDVEETLRISQKIENINEDDIFLIEIAKELIAENPALSVEEALKLDSIIYKRKQKNLLPFVFEEMIAAWYKTTEELEREWQVKSKEVGKLKIDLRRLQNEQAITDLSVESLQKLKELQVIVPQEIDRVDLLARRKRERTSYVYAAEGLLQTIEKTEEELEIDDLGFMLEESAEVGQLIIDCLQNGKRWEDLMQDEKDII…
1	2159	GC_00000147	other	emors_7_2	84962	36.9	38.2											38.793	6.16e-41	WP_117692281	ATP-binding protein [Bacteroides intestinalis]	MNKEENKKLCFSIEKPRFSIKEDLILSKKTEVSLQECISKIKFHRIIYDEWDFKSVDPNGSSLIINFYGEPGTGKTLAAEAFAGTLKRNIIKVGIADIESKFMGDSAKNIQSIFELAHEEQAILFFDEADTMLGKRLSNVTQGTDNEVNSMRTTLLIELEKHDGIVIFATNFIKNYDSAFISRIGYQIEFELPDLDARSKLWEKFLLPTIPFDDDKVETIANLSEQSKGFSGRDIRKCLRLSLPKVFQHQVDNYHLTQSILMESLTDVSESKNLLISKKRKKENTTNVVQAVSLLGINNKKENDNGII
1	2162	GC_00000150	other	emors_7_2	84962	36.9	38.2															MDFLLFFVPDTNEVIQVVFFSILTCILIGTLISLKINAREENWEKNWHGKLESGDTLLGSEHGSLQDMSSAVATKSEHACDVMPGFLLIIGLLGTFLGLGIALNQASTIINADLTDQNYDEMMNSLMLMMGGLGTKFKASIWGISGFLLIRLISSSFGIDSKRLFWCAEKMKEDTRLIKNKAELIESARLDKTLESFSLLGERLSISLERGFKENSEILQECMNSLAEINVCNNSILKEKDKMNKLLFNGFCVLNEIKDLNLSIGDKIEANSCDSNQLLNEISLNIVRNNNFDLLVNINSSLNHVADMTAESSAQMKAFSESSRDSLSSLSSSSQLMHEASQGINKGASNLSKTVDAFDLNMSRVMDKVSTDLDSTICEMSHTFTNSMSGMAKDMEHAT…
1	2173	GC_00000161	other	emors_7_2	84962	36.9	38.2															MLSNLKIILSWGVPIIFLNTAFAYQADDFSENYNEKLTKRIEEYKKNDLKLNLLYKEIRSGLIFKNLDHDFKSSQIQWIKYKEQACSAKEYFPNTEVSNDVMTQYLIAECNSWVTQARIIEFNFIRNKSVELAYLKTKNVQKPPTEQYLNSWKEYVKSNCALNKKLHNDSITSCTSRLNLYYKELVL
1	107	GC_00000001	flanking	emors_8_2	81310	37.1	38.1											47.917	1.71e-27	RGC81918	PTS fructose-like transporter subunit IIB [Hungatella hathewayi]	MKIVAVTACPTGIAHTYMAADVLKKAAAKLGVSIKVETQGAMGVENVLTPVDIVSADLVIIASDIEIEDKNRFLGINSKQFPIETILTDVEGILKKHLF
1	108	GC_00000001	flanking	emors_8_2	81310	37.1	38.1	K11203	fructoselike PTS system EIIC or EIIBC or EIIABC component									61.429	0	WP_117709256	PTS fructose transporter subunit EIIC [Fusobacterium mortiferum]	MDITSLINANVICLDLKSTSKEDILQEMVQILDDAGKLSNKTQFLADVWAREEIGNTGFEDGIAIPHAKSSAVLTPSVAIGISRTGIDYGAEDGEPSDIFFMLASTDGDDNQHIEALAQISSRLIEDGFTNKLKKANSKEEILDLFTDIIQPSAESADIENAPSQTEKSELTRKLGRTKEHLLFGTSHMIPFIVAGGVLLSLSVMISGQGAVPTEGILADIAQMGIAGLTLFTAVLGGYIAYSIADKPGLAPGMIGSWIAVQQYNTGFLGAIIIGFFAGFVVRSLKKIKLPESMASLGSIFIYPLVGTFLTCAAVMWVIGAPISNAMAALNEWLASIAGSGKIALGAILGAMAAFDMGGPINKVATLFAQTQVNTQPWLMGGVGIAICTPPLGMALATF…
1	191	GC_00000002	flanking	emors_8_2	81310	37.1	38.1	K07001	NTE family protein									30.518	3.63e-99	WP_119143698	patatin-like phospholipase family protein [Pseudomonas reidholzensis]	MLHVFRLNLWFVFLATFLFTPYLYAEPIKEPSRPKIALVLAGGGAKGAAHIGVLKALEELNIPIDIITGTSMGAYVGGLYATGKSASEIEAYLHTVDWYSGYQDEVGREEKNIRDKKYEDRFAINPSLGIRKEGVKSPKSAIQGQNMLKILRETSGNPVSVASFDDFPIRYRSVATDIVSMEEVVIGHGLLVDAMMASMSVPGALPPYEFEDKLLIDGGVTNNMPVELAKEMGADIVIAVDISSNYMTKEQIGSLFDVASQLTNFMVKRSTQEQAEFLTDKDILLQPRVGDIETTDFSSMPRAYQEGYDTVMMLKSRLQSLAVTPNEYAQYSNKIKQQSSNVRLAQGAIIDKVEVENRSHYESDKLERFIQFEQGTLLNSDYIEDKIHALYATNRFETI…
1	260	GC_00000003	flanking	emors_8_2	81310	37.1	38.1											30.097	1.17e-08	WP_116986099	phosphoenolpyruvate--protein phosphotransferase, partial [Escherichia coli]	MELNTIDYRITFFVKDQGLPPQVASQLTRLAKKFKSLVYIDNITQNRSTNAESSLGLLQVGLCPGDFCQLITVGMDAEWANFVLTDLLSSTFDFVASDKLCDFSETITNTYPQLTPQCEVDFHYVKAQAVLSKFEILKGLSQLIYPKESDELLLALIKREERSSTAMAKQIALPHVISPYVEKPTIAIIRSDYPVDWASKMGDVNVIIALVLPEKPTKEMIMAATYLTRSLLSEDFSQRLVHTRQPKGLQALILYAMCQLL
1	328	GC_00000004	flanking	emors_8_2	81310	37.1	38.1	K01809	mannose6phosphate isomerase [EC:5.3.1.8]	M00114	Pathway modules; Carbohydrate metabolism; Other carbohydrate metabolism	M00114	Ascorbate biosynthesis, plants, fructose6P > ascorbate					61.637	4.96e-172	WP_005478337	mannose-6-phosphate isomerase, class I [Vibrio parahaemolyticus]	MNALKPQTFYPMTNVIQDYAWGSHTSIEALFDIKNNTGKPQAELWMGAHPNGCSAVTVNGDSVLLSDLINQDKEAFLSKTTADAFGELPYLFKVLAAEKALSIQVHPNKQQAVDGFEKEEKTGIALTAFNRNYKDNNHKPELVYALTDYKAMNGFRDYQKIVSLFSAMQLSTIASYVDDFAQEPNSNGLQRFFKAILSLENETKECAVAELLDYASNSTDELFVLLQDLAIQYPNDVGLFAPLMLNVITLKPGEAMFLSACTPHAYIHGTGLEIMANSDNVLRAGLTPKYMDIDELMSCTEFVSQPLSSLLTQPNTVDGGMSYPIPVNDFKFSVFTATDALTLETNSAEILFAIDSDLTLTHENGESVTVAKGHSVFVPAYAKRYSLTSSGNVARAYN
1	394	GC_00000005	conserved_T6SS	emors_8_2	81310	37.1	38.1											50	4.79e-11	P96156	Chitodextrinase; AltName: Full=Endo-chitodextinase; Flags: Precursor	MIKLNKITAAITSVMFSGYLYAADASATSNVVTFVPGETKVQNGDMVSFNGDCFVAKNNPGVWESPTADSWFWDVAECSGEPNPGPGPNPGPNPTPDPDLGDIIPFIPGKTQVENGDVVSYENQCFIAQNNPGVWETPSASSWFWTLTECSDEPVNPEPEVTELSILAPTAGQVLTANEAISINAHVDGNLAAKVEFWANNTKLAGKTVNQNNTQYSQTWTPSEEGNATINVFIFDKNNQKIEQKSVSVTVKAEVTEDFVAPVVKFVTPANGSTMNVAESLSISVNATDADNDLATLVVKANNKEICSFDAANTDTFACDWQPTQAGNVTLNAIATDVQDLSSTATVKITVEEDVVEPPVEPPVTPGDLCKDFNVYPDWTRGDHATGGDIMVHDNIAYS…
1	439	GC_00000006	conserved_T6SS	emors_8_2	81310	37.1	38.1	K11892	type VI secretion system protein ImpK									24.8	1.8e-08	WP_010910863	type VI secretion system protein TssL, long form [Mesorhizobium japonicum]	MSYVEDDVTVVLFQPEPGKPMEVMPAPDLSRNISVSELDISSMGINPLVDQFSWLIASLSCMSSIPWLDDPMPFREQVAREIRKGERMLNEMEVDRASILVIRYCLCAAMDESVCRQEWGANSNWSQNSLLSEFHNETSGGDKFFVILDRLKADPRKYRHVIEFLYLLLQLGFKGKYGRAERGAESLTEIGNTIYRLVRDERLAEQEKVALVDVKSKYLKKPLKRVLPPKLILGVSALLFAAMYAATYLVIDVRFQKLLSLYQ
1	478	GC_00000007	conserved_T6SS	emors_8_2	81310	37.1	38.1											41.849	3.09e-99	WP_011105819	hypothetical protein [Vibrio parahaemolyticus]	MTIFIVIFTIYMVYVSRCHLFTNKYNACSLITTTRFYIFMRIFSFLKLFAGLGLILLISSCGGESKDTSPPKRETTSVSGILFDAPIAGARVVLWEYANGAIGKKLGETRTSSKGDYSMEVNSGSMPVLLQAFGGAYTDPATGEVVYEGDGKTLKFESTAYFYENKANRIMLTPLSLISKGLADYKIHKLGMDAKGAIDSANSTISNMYGFDVITVEPIDIVKGGQSAYVTAGHQYGAYLTAYSVFSSDLIKKYPASDSSSIYTSFTLSDIMYRDISADGQLDGYETDNISGLDKKISFGKESVSVETYTNILSQYILITVNNNRLNVSGTNPNDYKPFASKVNKLGTTPETMTVFPPRTEVPIDDTEPTVERSDKDVLVRLDSLDLLVKDNVGTKSLR…
1	517	GC_00000008	conserved_T6SS	emors_8_2	81310	37.1	38.1	K11906	type VI secretion system protein VasD									26.984	5.13e-15	WP_010910850	type VI secretion system lipoprotein TssJ [Mesorhizobium]	MQKLLTFSLIFLLSGCTMWDQFKESTGITPETSSIELIITADKVLNVREGGQSSPVILRIHELNSPVLFRNLDFFALFENDKDALGDEYIKRYEYQIQPGDVVHETLVLDPATRAIGFSVAFRDINGSSWRKVELIEEKSEYFLKLNLKESELSSNNTRGIEQIYF
1	555	GC_00000009	conserved_T6SS	emors_8_2	81310	37.1	38.1	K11893	type VI secretion system protein ImpJ									33.107	1.16e-83	WP_005463797	type VI secretion system baseplate subunit TssK [Vibrio parahaemolyticus]	MSLYNPVVWQDGMFMKPQHFQQLDRFQGKQSGMLSGFESPLHWGIKRIEINTELLALGKIGITHAEGILQDRTPFDLPLHASLPEVKDVDASVANKVLYLCCPLPSERSELFGTSKDGARYSIHTQDAVDACYDSEEIANITIGKLNFCLMYEDEDKSAYTSIPILKISEVKPDGSIILDNAYIPTCIDINASTVLKKFTTEFASMLRHRAESIVQRLGVVDQQGVSSVSDFMLLQALNRYEPLFWHFANIEGVHPEAFYRVLLQAEGELATLCSSSRRPQEFVPYNHGNLTSCLSTILHNSKVTLSVMSEQRAIPLPLKEQGYGIRIAPISDRSIVESTTFILAVKADVTLDILHTQFVSQTKIGSIDNIRELINLQLPGINIKPMPVVPRALPYHAG…
1	593	GC_00000010	conserved_T6SS	emors_8_2	81310	37.1	38.1											66	6.29e-97	WP_011105828	hypothetical protein [Vibrio parahaemolyticus]	MAKPIQLGFMALIMACSLPAFAKGERYGIAANFKTIESTEYEQGMSGELSIISYGLVHTRPIDENNNRWRWLFGFNYLSDYIEAPANGVYQEVTNYEFRIVPQYALGNWWAFTPYVGAGLSLGYSQYGNRWKVDDEGYKYGNQLDDIDQFEVGAVLSFGTVIKLGSNPDAHLQIIPQASYIQPIYNDGLGGLELSVSLLF
1	631	GC_00000011	conserved_T6SS	emors_8_2	81310	37.1	38.1											39.13	0.000438	WP_117539334	FHA domain-containing protein [Coprococcus catus]	MHLNQLTLFITKSPEEYTGSKHIEMPESGGSLGRNPSNTVSLVDHNRFISGSHCLISIYGDTYYLSDVSTNGTLVNGNKLLKNQPISLYDGDTIVLGRYEISVGLEKLSNSVNIAADISEETDSTDPLVNLAEYTPDEEKDKGNIADLFKETRIDKVDSSDPVAHLNFITQTNNDDHLLHGNEKKQEQKIKEPIHTRQLLDDSDSVHSEFDVPNLIPEDWFSNDFTDTSIPPVQVNEPIATHSEPESMMHSFTDSTPETIISSASEISSVTEQLAWEDVTQTIQPSVSTTEPKSDEFFIAPSTSMDVYPSQSIETSFNSKMSDDAASAFYKGLGMSASQIEQTDEQFFQQMGNCLRLCINNLQKELSELKAIKNNEQDDSMTNIVELMLSLNHQQLLSP…
1	668	GC_00000012	conserved_T6SS	emors_8_2	81310	37.1	38.1											30.882	1.68e-20	WP_116949140	Lrp/AsnC family transcriptional regulator [Jiangella endophytica]	MSNMNLQGLDKLDRRIISNLLSNGRESIANLSRNVGLSRTAVAERINRLEKTGIIKGYTAQIRMGNKDENASSYLLISCNKGQKDSVSDGLKEIPEVKMTSIVGGTYDIICLIEAPDLHRIHYLCSEIESLSGIKEVKNTIVLHQPVCR
1	704	GC_00000013	conserved_T6SS	emors_8_2	81310	37.1	38.1	K11901	type VI secretion system protein ImpB									40	1.77e-32	WP_117580760	type VI secretion system contractile sheath small subunit [Enterobacter]	MSRDGSVAPKERINIRYVPATGDVQEDVELPLSMMVVGDFTARTDESPIEDRTPINIDKDNFNDVMEGYSPNVKVNVDNKLSDEEGAQLGVDLTFNSMKDFSPEAIAKSVPELNGLLELREALVALKGPLGNVPAFRKKIAAVLQDEEARQKLLEELNIGSAKEEAKAE
1	740	GC_00000014	conserved_T6SS	emors_8_2	81310	37.1	38.1	K11905	type VI secretion system protein													MEKGYRLLERIELGEPKNCYEKVVSHKHLIESIHLHLADLLNTHAGNAMIDNDYGLPDFNDVLSNNTNLVRNIQQNIKASIEKFEPRMRNVEVHYRHDNNNPLQLGFGIGGEVIHNGGKVPMAINIFMGVDGQFNV
1	776	GC_00000015	conserved_T6SS	emors_8_2	81310	37.1	38.1	K11900	type VI secretion system protein ImpC									60.288	0	WP_117611541	type VI secretion system contractile sheath large subunit [Escherichia coli]	MTAEAQAPEQEAALVESGSLLDSILNETRLKPSDEGFDVAKRGVEAFIGELLSTNTSDKVDQSLVDLMISEIDQKLSKQVDAILHNKEVQAIESTWRGLKYLVDHTDFRENIQIELISAKKDEVLDDFEDAPEVVKSGLYKQIYTREYGQFGGKPVGAVICDFQMSASSPDIKLMEYMANVGAMSHAPFITSASAKFFGLDSYEELPNLKDLKSVFEGPQYTKWRGFREHEDARYVGLCTSRMMLRTPYSVEDNPIKAFDYNEHVKDGHDNYLWGNSAYAMASKISESFAKYRWCPNIIGPQSGGTVSDLPVYNYESMGQIETKIPTEILISDRREYELAEEGFIALTMRKGSDNAAFFSANSVQKAKVFPNTPEGQQAEMNYKLGIQLPYMFIINRLA…
1	812	GC_00000016	conserved_T6SS	emors_8_2	81310	37.1	38.1	K11903	type VI secretion system secreted protein Hcp									52.326	6.63e-65	WP_137712216	Hcp family type VI secretion system effector [Brenneria rubrifaciens]	MPTPAYMSIKGETQGDITKDAYSADSVGNVWQEAHVDEFLVQELDHVLTVPRDPQSGQPTGQRVHRPVVVTKQQDRCSPLLFNSLVSGEKLPECNIKFYRTSTSGKQEHYYTIKLIDALLVDMQTRMAHCQDAAMSDRVTEEVLKFTYRAIEVTHETCGTAGNDDWRTPREA
1	848	GC_00000017	conserved_T6SS	emors_8_2	81310	37.1	38.1											45.455	1.23e-07	WP_117031792	DUF2169 domain-containing protein, partial [Klebsiella pneumoniae]	MQLWDIDSESPFTLKGRFQRDSDGHEVWVLSMKRAWTFLDGSWSEEVDNLELNDDPIYLGEPGFSAMVADHDFPIYKKNTDVLIYGKARSYAKKPVHSQLCRVLIDEHIDKTLKVVGERHWVDHSGSITVSTTQSFIERDIDYSNAIGGDERNRIGGGVAETNTELLKAKVPSIFYPDQNWQASSKKVKVAGFGPMPPFFHDRAKWAGTFDEKWFEERRPVWPIDFDARFYQSAPQDQQCNGYLQGGERLMVSGFCHNDALSFRIPSEKFQAVAVFNGKEEKINMPMYTLWIDTENKRIEATYTAAFPCQNREHLLTSSYLVELS
1	884	GC_00000018	conserved_T6SS	emors_8_2	81310	37.1	38.1	K11895	type VI secretion system protein ImpH									32.344	1.8e-54	WP_000348794	type VI secretion system baseplate subunit TssG [Escherichia coli]	MIQYIVNKPCDYSFFQAVSLLEKHYQNLSGIEYKAIGENQYVKNEYIQFSVSPKLSFPKSDIEFITEFERNDASYTQIEVNFMGLHGVSSPLPASYTEKLAGRDPDDNPVKEFFDFFHHRYISMLYRVWKKYRYHIQYKSDAKDPFSGRLLHLVGLSSVIQESSEVDLDRAKLLSYVNQLSTRTRSPKLVSGIVSHYFTLSNVYIEEWVYRRITIAASQRNCLNRKNCQLGGDFHLGQSMADLTGKFNLCIDDIDFDTYVKFLPGGALHETLIGLMKFILCDPMAWDLKLTVRNKSLPINQLGDGLGNELGQTFWLGAAKGEETKIKIVGSN
1	920	GC_00000019	conserved_T6SS	emors_8_2	81310	37.1	38.1	K11914	sigma54 dependent transcriptional regulator									41.463	2.44e-77	WP_126397535	sigma 54-interacting transcriptional regulator [Blastochloris tepida]	MSLAKSDNLNNALLAISQSLADRSQLALTLDAILAAARQLTFADHGIIYVLDQTGQALLPSVVHHNEHILAEHPWQPLTLESIDETDPFSFAIQNGEVVLINDLYQYNGYQCDEIYQNESILNRKSKNLLAWPLIDNEKNTVGLLVLFDLNVINDEASLTCFCQMAATNIRQAVWLEKYGYMIKELSEDNASLTRENNQLKQRKQSQYSGPIAESEVMLNALARLDKVLSLPVDVLIRGETGVGKEVIAKYIHENSNRSKQALIVQNCAAIPEQLLESELFGHKKGAFTGADKDKIGLFEAADGGTLFLDEIGDMPLLLQAKLLRVLQERKFRPIGGNKEISVDVRVLAATHANLMEKIKKNEFRADLFYRLNVFPITIPPLRERTEDIIPLSEHFIKL…
1	956	GC_00000020	conserved_T6SS	emors_8_2	81310	37.1	38.1															MKPYLLLLPAALVVAGCSNQTSVPDPLAPYKNVHIIGNKKQSIGSFNYLSKDVDGYTDKQVIVYFNEIPFTSTFNLCADKGVYIANCKSTVSIFPSKNKGVIFNYDLNFYNGSYPARVGSMNILLPSTTTRKMDNLTQYTSAKFSEEQFLESEKLKEATFILMKSS
1	992	GC_00000021	conserved_T6SS	emors_8_2	81310	37.1	38.1	K11891	type VI secretion system protein ImpL									22.962	3.98e-68	AFJ27267	IcmF-like protein [Escherichia coli Xuzhou21]	MIKNTLARTPFILSTVISAFFALLLVGVYYLWFNQADLRLLWGMLGIIFSIFTIFNLTLYIKKRKNKSHQNIETEEDTLSMVLKPLLHKAGKKPVYLVLGNKGSGKNQFLNVSNAIKPMDKVKNVKNDFFEWSESDSAVYIKPNHRLTFQEISSNDSLLWDALINEVIKHKPRKPFAGCMLLIDFEFLIVHDDEQTDYTLNALLQRLESIKETTGATLPLYLIMTKLDKLEGFKEYIHFSPLKSSVEFLAIPLKDAKGAILDYFRDSYKNIVKVMESNALDSSSYTNNPDEKQTILAFPKQFELCEKEISRIIERLNELNQGTYSIDIREVFFSSSLQGGRKYNLLAKSCSNYFNLPIIASEHSQLTETPYFTRFLVDAKVLPESDYSAENQHYLKRIQ…
1	1028	GC_00000022	conserved_T6SS	emors_8_2	81310	37.1	38.1	K11896	type VI secretion system protein ImpG									32.241	1.47e-89	WP_117681754	type VI secretion system baseplate subunit TssF [Klebsiella pneumoniae]	MSNSKYFQDELTYLKEAGSEFAKYHPKLTHFLSEGTFDPDVERLLEGFAFLTGRVREKIDDELPELTQSLISLLWPHYIRSVPSMCISELVPHSGSVTEKIIVERGAEMASEQVEGTQCQFRTCYDVALYPLSIQQIEQNNSRTNSSLHLTIAANNGLELSRIKLDILRFHLHGEQHITRSLYLWLFRYLEYVELDVGGGYKHRLRADQVVPVGFGDGEGILPYSKNSFSGYRLLQEYFSLPDKFMFFDLKGLEWLGGIPQRSTVKISFAFSRALPSEVIVKNKHFKLHCTPSVNLFEKDGDPIRLDHQLNEYKVRPQSSNQEHYEVYSVESVESWSKAERCRKKLIEFESFEHQINQRDKRDFYKTKVSERINGRGLERYISFHSHNNQVSELGSETV…
1	1064	GC_00000023	conserved_T6SS	emors_8_2	81310	37.1	38.1	K11910	type VI secretion system protein VasJ									24.554	3.18e-25	WP_119144555	type VI secretion system protein TssA [Pseudomonas reidholzensis]	MTSLNFESLLKPISGASPTGEESKYEFCYELMELEIKKFGSLFGETVDWKVVETNAIEVLTTYSKDLKAICYLIRALIERNGFEGLEEGLNLLKQNLVLFGTDLYPQRKRARDGAMEWFVAQLETVLPKLDSSTTNWESVTSYLQKINEISDQYYEVFPDSEVEFYLITSVLNGISQRVVGAGETNTDTSRNTVCEPEPLVEETTSTVTEVKTPVQVVTQAPRTVNTVKQEVDIDTDFTSPSASKRTLKKVAEFMLHSDISTPLAYRLHRNCTWCEVDELPPHDNDKKTPLSLAVSQDQLSEYRDKAKQETEAEVIKRLERTLTDAPFWLTGHYLMFQMLTNLDHHEAAEAVKQETQHFISQLEGIELLTFANSIPFADEETLKWLSSNTASVPVSVAS…
1	1100	GC_00000024	conserved_T6SS	emors_8_2	81310	37.1	38.1	K11907	type VI secretion system protein VasG									45.504	0	WP_117580830	type VI secretion system ATPase TssH [Enterobacter]	MININLSSLIQRLHPITKVALEDAAALAVSERASEVQIEHFLLSLLERPNSDFDQLLAHFECSENLLRQAIKSTLENSHKSNGGKPVFSAMLIEWLQEAWLVSSLDLSETQIRSGALLLTLISNPLRYGQHGYSSLLENINPETLKRNFAELTSRSIESQVATSEQTHAREDGSALSKFTTDFTGKARKGEIDPVFCRDQEIRQIIDILARRRKNNPIAVGEPGVGKTAVVEGLALKIVQGEVPDCLKGVELYGLDMGLLQAGASVKGEFEKRLNAVLDEVKNSPTPIILFIDEAHTLVGGGNQAGGSDAANLLKPALARGEVKTIAATTWSEYKKYFEKDPALARRFQLVKLDEPSTEQAALIIRGLRAVYEKSHNVYVRDDAITAAATLSDRYISGR…
1	1136	GC_00000025	conserved_T6SS	emors_8_2	81310	37.1	38.1	K11904	type VI secretion system secreted protein VgrG									37.455	1.19e-117	WP_002213876	type VI secretion system tip protein VgrG [Yersinia pestis]	MVSDIEFKFEVLGTEHEFRVESFNVVEELSKPFHVSLSLLSLDADITFDELIRKPALLSIFGQGVGTARQFHGVVNEVRYLGEGRRFSRYQITLVPQLWFLTQRQDCRIFQEKSVVDIVTEVLDGAAVTDYRFDISDLYPTKEYVLQYRESDSHFVQRLLAEHGLWYYFEHTTANHTMVIVDKNDAIAELENTPLNSSYVGPVIYQADGGGNADREHIFDLESINRVRTGHVTHTDYNYEQPRIPQKMESSGLIDTDLAFFDYPGRYIEPSQGLVRADELMAESVVDNYQIEAASNVMRLIPGYSFILDKHPRRALNRDYTILTVTHSGYDPQVHEDEANEMPTTYQNQFSCLPRDIEFKAPKIAAPVVDGPQTAVVVGPAGEEIYTDKLGRIKVQFHW…
1	1172	GC_00000026	conserved_T6SS	emors_8_2	81310	37.1	38.1															MVRLQLTNSIEVTGAIDENSQAESLACVPRFGKVISLHPTMPDRIYVEFDGLATGSTALAKIGRLFRKSELEFAIESGLTCRIEFLNGDITLPVLTDIFFSLLDDDQPVILRAQSLIIEAENELIVRSGATQTKYSGRDGRVTTQAKYITSQAEKAQKIQGSTIAVN
1	1208	GC_00000027	conserved_T6SS	emors_8_2	81310	37.1	38.1	K11911	type VI secretion system protein VasL									45.287	3.99e-124	WP_011105827	type VI secretion system ImpA family N-terminal domain-containing protein [Vibrio parahaemolyticus]	MLGLKFNMNLSDFARRPISIEMPSGINPNSLDDFSEIKREVNKLNTVTSKISWKHVFKLSKSILETESKDIRCACYYTVSATHIDGLKGLVNGLNALLDICVIYWHSGYPDVNKTTARMGAFEWLTEHTIKKQKTLKISPTDLVLIETGHKLTLKIEEELRSHYGNKSPSLGAIRRIFSQWIEEIQTTKLSLEEQRLKKEAIEKQNNSGINVNVSLPPRDESKKTAQPTMTHTEKDKNIKPMVTISLAFIFILTLLFGHFLYADNQKSTLLINIQKADLTTINPLISQLENKEDDLKQYVKTALIKQALHLNKDWEVTSTKVDKINELETLNHSLKNLYSDSAAVKKLEYEFNQQRADFENEYSDIHRRFLKSRTIFANAKNHNSDENIVKAYSYSNSL…
1	1244	GC_00000028	conserved_T6SS	emors_8_2	81310	37.1	38.1															MSIYQHQYILDSDIVVPTGMNTELAIAIARADIDRFATYEDGNEKYTIASLEFVDQTCLMTKVQETLNVLITPLLDRLHISLKPLPLLLSVPHEISEHDLRNWIDESDFSDYLSNIKFSKNSGNAFLQECLNSLTEPDAIMCIAIDSLYEKKEALMSSRDAMSGTNPWGVLPSEGGAGMVLTKRNVLDTLKLIPQSKIVYSQFDWHSSDRRGCARLIRAASKHHDNLGPIYSDMTNQRAHTEDYGFAIGARSEVIPCAQQVTLTNEFWGTIGGGSGIATLATMNHLSTVGVLSTAFLFDQNNTRSLFILNREK
1	1280	GC_00000029	conserved_T6SS	emors_8_2	81310	37.1	38.1											30.526	2.22e-17	WP_138184353	serine/threonine protein kinase [Paenibacillus alvei]	MSELQGSTNDFINQLVVKAIEKKKKNEQTLANKLKPRLEHVLFSQFDVLETIESYNQKTTLYRLAKKDEPEKQICCKVLNSEQPEHVQEMFVAEATHLEVAQHPSIIDFIKLGNEFERPYFMYKWAEGESVAEKLTRHKYKSFRHDHIAWLIYQLAGALEYIHTKGICHLDIKPSNIIICEDDSIKLIDFGAAQYINDSRKYNEASLSYASPKYIESGKAVPQDDVYSMALLVCALFTGYSDNNDWKALLQQRKRPHTIPKTVWNLLRLVVTKPRTHGLTPISFAQALAHIDISVMQGSHNAPLFAQLRNADLVLRKSSKYDVFRLGRFKYLEASLAACLCLITFTVLLKSFAFTVADSNAVSLSDTSSRIKPAQAATFLSQPPWEIENALDNNSSDVV…
1	1316	GC_00000030	conserved_T6SS	emors_8_2	81310	37.1	38.1															MNRYRYLVDDVKKTLTDADKQQAIADIALAQEQLSSFSENMVNFLYTKAILAAETASFYIKQQYRFHQNGYPAKEIDYLTLLETQLSEIEKVFIALLRIHRGFVYVVYSEYPEVLAWLCLSKNIESQHDNDELTLLGISIIDQLDPELAMSLILRSNSNHIHKLLARFIEGGASKRELYYRCLVINQSVSVSLIKHWLEDKKLPEKMLHSYLVLMNVGSSIEWLQELTNADDLLFENLILKEDRSTWFRQQYSVDTISSETANTYSKLLTLKEFSLFDIEKEQAVIHFILSGDTELVPLIIEHLMQLDEVDAQLWCEGLFLVYGEEFPFLPSKLGNTIEWQDALHEIVEWQEQIEVVKPVPLRMGQKLTFDASIKAMKSSELSSSLREWLWRELCIMSR…
1	1352	GC_00000031	conserved_T6SS	emors_8_2	81310	37.1	38.1	K19304	murein DDendopeptidase [EC:3.4.24.]									34.545	5.48e-41	WP_116986330	murein DD-endopeptidase MepM, partial [Escherichia coli]	MKLKYLTFISINLAFIILSISLLYFSSNHSSVINGSQLSTSPQKNVFDEKKQKPDNLVINGTINDSFFSSALNAGLTSKQIFSFTEALHNSVNFIDGIEDGTPYSIVLDKDTSHIRSFFYTENNRLHTIQLANNGSYYNELGVNLSSNKLILPTGNLFRISSHFSKERKHPIVGIVQAHVGTDYATPIGTPVMSVSKGIVSRSEYHPLAGNFISIKHNNGITTRYLHLNDRYVNKGDHVYKGEMIGKTGNSGRTTGPHLHFEYIVNNIPQDFTKLHNDIEMPLNNKNQKKLLKCINLSKTLITKILKEA
1	1387	GC_00000032	other	emors_8_2	81310	37.1	38.1															MKKILLLALFSITLMGCNDPESVAAEASQLRAEQHPDRTYVGEHNYYIMESSEHAAFGRKKELKVMYQDFPRYFVEKAKEWPKEDLNDASSYDLPRFQFAWANSSSKDEYESGLKIWSMKTDGTDLRLVTDVTVELVNGIKNLTRSPNNRYVAWADLGGYKTVYDIKTGKVVELSIAMSPLPMLWSEDSRYLYFERARNLYSRWDSMTGEVSKVDLKIRTEAVLTEDKIIKVTDAAVVGYNLKTNERLFVLSSDRSLSDKERIFNVKSISPTGRFAWGSNQDYGWLFDTKEQTMKQMVDDFVPAQILGKDAHYSALSKMTYVTIVDRVEDKVWSWRAFSHGAMSGEGILYNGLANNGLWFKEDK
1	1421	GC_00000033	other	emors_8_2	81310	37.1	38.1							EFF01293	41.421	6.8e-153	NA					MHFNCKLIPSSSLSHKELEYILTPDEYVRLLSRGKNSQSIINQLPVQLRQSLSISASKSVQSLLFSLNQKLTKAEWIAVSTTIRKTGVSDTQLAQYPQLKKQIDRVETTQPAKFVKANFKPVTDDVPLVRNLLFTPVEPSPEHKISIEFAGQWPNNAASLLLAKSGEQKEKIAKPRADIHASHRSIATFKDLEPELRNLYLTIPMNGTPQPLKLLLAENIQPVDKETEMDEWDTVLVPVVPMKKLGEEYSLHQTGYFYVIWNGKVWREITIDSNGYFCDLDIQHERQEPLLTRHVNINASEFFPEANMSFEKFELYQEGQKVFSGELDVCEQSRVFNLVAEEVELKFVDFDHDEILLTTFESPIKNNASNERQAMSYPMPHVWLPYKLLGEVQSDCYVY…
1	1454	GC_00000034	other	emors_8_2	81310	37.1	38.1											32.11	1.25e-05	WP_005483532	OmpA family protein [Vibrio]	MSALKTYDHGIYLLGAYFKSYLDEEGERIEATWHQSSDLTEADLHNVRPIPFTPVLVDDAEKPVLWGANKDGLLCQLGYFDENTVPETIAKKQTFLRHKAPLTVNELGESQSYSLIFPPLNVIGQLAETHTSVKALNESLKDIYSTKLLPEKPDLIQFTISKISVEQLAKPYKQEPDKPLTDEQNDYNDWYENIKKSQVTEIQGIITPAFHSIGVVFSSDLYVGAEVSLIQVKSKQDSSGKAEKVLAKSFVTKEAPKKEQTQEEQEDSKKILPSVVFNFDPTLIDDGYFLLRTHFWVKDYLDKQKEFLGEEVEATFPDSVKQGQLKFKANDTRPGTDFTQDVYTYELHEKVTFKPISGFGKLAMVCGDLISLEECLIYQYPTALPSYSDFMTQQGNPVA…
1	1485	GC_00000035	other	emors_8_2	81310	37.1	38.1															MFFHQPTLTSLSLPPLQHKKTITLVILTIISVRLKITNRIESAHNKFYKNSMAIQFTSIVESGRFKDRKFARLVLNTIILIIVLMVMTLEILDDYDILDIFNDIQDNIIAFTTLCYMSALYSYGYQLPLFKHQWQVFLILYLTLAQAVYVLGYLTYTQYDQHSIIYLLSYGLFWSLFYGYLIYTINNLKNDIK
1	1515	GC_00000036	other	emors_8_2	81310	37.1	38.1															MNNEYHILSKSVFSQFLFQQTPKPIVPVEPDLLLEMTFSPKLFIINDIAEKVENLVQHGVEWLDARVDCSPSQPTDEQIKVFENFRMPYIHQTYRLTNEEKQYGKLNWLDLNSVNLDFSRLNNIPLEERLIFKLEEDFGYVFLHESVIELLKKHVKDVWVRDV
1	1543	GC_00000037	other	emors_8_2	81310	37.1	38.1															MCKQTNYSKYQKRVIKFLNDLLGADTPFTYERANNNHLKVLIDGVTKPLFTGSTPSDCKSINNFMAEVKRELKASKKEESKLSQPEKTGVVSAITLSNDKLIQNCVKSLRTRITVLKEQEKESVLNNKCINGLNLKRIEIVKHSVSLALQARKQGTYLKPKELRTIEGMVHNHLNFMLPSMAYYAELLNSTSKDKLAKVQPNKQQASVHNESNKNNVISLEDKTQHAPTKEAKKLAKKPKQPVSNKNMNTKNSNSATELMAMSANNRVSLLRNLTKAQALMLIDDINQAMAANREEDIQAVIALIRDKDLPLDAIISRMEAA
1	1569	GC_00000038	other	emors_8_2	81310	37.1	38.1	K19135	CRISPRassociated protein Csx14									29.801	3.78e-19	WP_116935424	CRISPR-associated ring nuclease Csm6 [Verrucomicrobia bacterium]	MKNILIAVTGASPQVLTETIYALHTQGKPMPEVVYVITTEDSKQTLKEGLFVQGYWDKLMTDYQLPPIAFNSDHIWVITDDNGNALVDAKGVDDQSIMADFITRKVALLTQDNEVAIHASIAGGRKTMAFYMGYAMSLYGREQDVLSHVFVDDEFEFVSDFYYPTPVDCFIQGKQVEAINAKEATVTLAEIPFVRMRRQVDECIINQMETHSFSKTVSALNSANNTQVRVSISTKEKTVEVAGVKIPLTSKHLAIYLFFLSKDNRKATLDRYFEDDKTQTTDYLGVLDKMKADVRLYKTMGLEDEGQWRQKDHAELATLTKDFVRQSLNGLHKSLKDKLVPDLFEKIKVHSDGVKSGATYLISPEVLFICDGIEL
1	1592	GC_00000039	other	emors_8_2	81310	37.1	38.1							EFF01536	48.843	1.1e-108	Toxin PAAR-like domain	45.361	3.42e-18	WP_119719572	hypothetical protein [Klebsiella pneumoniae]	MGVTVAANGLSVVHQGSGGEANATLPDVCLTKVGKPIVPIPYGNNAKSADLAKGTTTITMDGGNPVAIKGSTFSKSTGDAGGDKKGVASGTIEAEAEFISASPTVKFEGKGVCRLSDQMTMNKANTMCLGGAQNPSVSVTAEEEGTYTVDLFLSYSDGDPVQGAIYKLVDQTGAIFEGNLDTKGKASISGIAPGEFDIEYGEDSREFTPNIPTKENPNYNPNASAQMLIDETKRGEIGFWESSWRKTAGAVSWIWGVILGDFNDDATVEQIIANTAITMLPVVDQAADVRDMVANTMTLLNEEERDKPENWLALSLTLIGCIPVFGSAVKGTCKVALKSGKATSKDDLLAIMRAMGKGDPEKFLRTLDWADYAKQTSQIISDVLQPCIEVATELASYAN…
1	1617	GC_00000040	other	emors_8_2	81310	37.1	38.1															MNYSVITENYFSAKTSFSCIDSREMLYSKNNYEPTSSINPIIWEDSNGLIKDITHIIDNGDLCVSEEFAQLIMSFDPYGIETYPAKLILSDGTIQKRYILALNNIIDVMDREKSITEISPKRNKILVQALYLSEEKLLTYPLEKRILFRVKGAEIATFYSEDIYDLINNNERFNELRKIILNTSQEAPTF
1	1682	GC_00000044	other	emors_8_2	81310	37.1	38.1															MSIQKRKGKWERSSLGHIDSKRKAHPLNFKAKSIAAHHLISCEVASKLSSIRKKQIKYKGYDINHPYNLVFLPMIDQISCQYNVPLHKSGHTDSKLEAYYAEQSGSNINDEVSNLISERDKETNENKLSLLQGDIDMLNNLKGYHRIVGSMLAKTLKSLDCDDNSDDFVDSLDELSFDIATKLGRFQLHLISRGRHMQSGQDGCHYCRQDGNRNKHYHVTDNIPTQDYVKEYCYKGLRLYTVQEKA
1	1739	GC_00000048	other	emors_8_2	81310	37.1	38.1															MKMTDTKKHAIKRLILNNHWEFETRTISKNGKQEIGAYSGNRTRIISLEG
1	1817	GC_00000056	other	emors_8_2	81310	37.1	38.1	K01154	type I restriction enzyme, S subunit [EC:3.1.21.3]									37.442	1.96e-81	WP_118017750	restriction endonuclease subunit S [Coprococcus]	MSSLPKGWVETDFDNVIDSLTNGISDKQNKESNGIPVSRIETIADQTINYSKIGFVDNYDDVKAKKYLLNEGDILFSHINSPIHLGKTAIFDGRQELFHGTNLLRIVVNKRVTLSSYFNYYCKFTRAIGAFSLNAQHAVNQSSLNQKKIKAFSIPLPPLAEQKRIVEKLDEVLAQVDTIKVRLDGIPSLLKRFRQSVLASAVSGKLTKEWRGVGSEPFGKQVKLGELLKDGPQNGLYKPSRFYGNGTKIFRIDSFYDGELVDWETIKRVDLEEQEVDKYRVNIDDVLVNRVNSIEYLGKCALVRELPENAVFESNIMRMSIDTEKALPAFVTTFLRSIVGLQELRKNAKLAVNQASINQTDVKNCLLYLPKIEEQKEIVRLVDQYFAFADTIEAQVKKA…
1	1825	GC_00000057	other	emors_8_2	81310	37.1	38.1	K06940	uncharacterized protein									46.25	3.26e-21	WP_117611299	YkgJ family cysteine cluster protein [Bacteroides ovatus]	MPFPCTGCGLCCQQIHNIVELQEYHSGDGVCIFYQKQQCSIYQNRPIVCRIDDAYDQIFKTRFTIDEYYKENAKICNQLQMNAAMDAIYKVRL
1	1833	GC_00000058	other	emors_8_2	81310	37.1	38.1															MAIPWLIGAAVVGLVGSAIKSSIEEDEAKERQERWEREERSRLRQEEQERIDNARKDEALRVQRQIEKEKKALIHQESMRLMEKYEISDLSSTEFKSYISNIIVNGVSDSTSEIEKILSSSKKMIEVKEEESQLEKQLKELKEIQRYLESI
1	1841	GC_00000059	other	emors_8_2	81310	37.1	38.1											28.804	6.55e-07	WP_117586042	50S ribosome-binding GTPase [Prevotella copri]	MKLDISIMSEKFQHSLSRLDKIIYSDQKPRIAVFGKYNHGKSTLLNAIFGYEAFKSADKRETVENLSIEHDDVMWIDTPGLDADVHGKDDAAALTGAFEMADYLFLVHQVTAGELDKYELDIFNRLALNTTDYSQKMCLVLTQIDQKTGDELNTIIDKVQQQVSLESQFKEVKIIPISATRYLRGLEENKPIFCEKSGISTLFDEIEKIKNNVIKTREKEKFELINKIAHSLNEMELAINQEMNINKNKQVSLKSDITCELNKLITKVA
1	1849	GC_00000060	other	emors_8_2	81310	37.1	38.1											31.967	1.06e-06	WP_117586042	50S ribosome-binding GTPase [Prevotella copri]	MLTAFAQIKENIITSAPLINKYRDINEVKKELFDIIDNDTLQIMLYGAYNAGKSTLINVLLGEELAVVNDIPTTDKVDEFNWCGYKLLDTPGVNAPIEHEKTTNEQIKRSSVMLFVIREGDQDSKDLYIRLFEMLALGKKVFIVLNHQLTNDDDKAMAYKKIHSIVMSQAPKYGIEDKQIRELVVCPINLKTALNGRLNQHDKLLDHSGYTNFISLFEQWVKMNDAEQERLEHAISAVNTLWYMPTITELKQDGTDESNDALLNFRQDLAHLQARKKGLILESREMISHNVRLMKAQISQTLTQSTNQIELDTELEALISPLYKKVELWLEESLSHHYSTLSCDVQHTLKQASEDKNNPFFDSMLNQAKTFFSDEKTIKQGLLYGRKFKIPGLKGRWEK…
1	1865	GC_00000062	other	emors_8_2	81310	37.1	38.1											40.996	9.98e-51	AAC46428	unknown [Acinetobacter baylyi ADP1]	MVKNENVFVTSLRDFTGDFVLVNNREDELTKMQFEFESKIKKTLENSNGKLKKESLLFSLTDALKVSVLNGIKEWNEKLIDSLPMKKLSEEYSDRIILLVFGKVNAGKSSFCNFITEQFPNEEIKRFCFVDNRIEYFEQSFAEGVVETTATIQGVEIGRDFVLLDSPGLHSIVDENGDLTRRFTDSADAVLWLTPSSSPGQVQELTDLKLELEKKKPLLPIITRSDQLIEDWSDELNDLVHTIVNKSESIRQLQEVDVIERVKALGNVDDLKSAISISIHAYREHQEKENAQSQAGLNRLFSSLSDIIHEAKEYKVEKANQQLINFINDNVLSTLEKDISPQLLKLKDQTQKTLDDLKKKESLIISELLTTVKSQVRGVVEQHSASQDKVAISSGLNQL…
1	1920	GC_00000069	other	emors_8_2	81310	37.1	38.1	K01153	type I restriction enzyme, R subunit [EC:3.1.21.3]									70.374	0	AAA97247	CG Site No. 620; alternate gene names hs, hsp, hsr, rm; apparent frameshift in GenBank Accession Number X06545 [Escherichia coli str. K-12 substr. MG1655]	MQKSNFEFLKGVNDFLYAIARAAENNFPDDPNTTLVKVRIFGEATAKHLAKLLDIEAPDNQHELLRELGKIPFVDDSILTVFHKLRKIGNKAVHEYHNDLQDAEMCLRLAFRLAIWYYRLVTKQFDFAVPVFILPSSENKAQFEQEMHSLKQELLLVRQGEAQTKAEIEAQNAKLTALTGYISVLESKQEETQGQTQERIAALEAQLQRKDEEIAKKTEAERKAYKKQITDQAASRSLDLSESESRYLIDNQLRKAGWDADSKLLNFANGTRPQIGRNIAIAEWPTGKDETGKTGFADYVLFIGLKAIGVIEAKKANKDVVAKLSEAYRYSKYFDNDFLRNELQYAANDQTALDQIAESLPTYLPTWSDSSNSEPYKIPFCFSANGRAYRSAIKTKSGI…
1	1927	GC_00000070	other	emors_8_2	81310	37.1	38.1	K03427	type I restriction enzyme M protein [EC:2.1.1.72]									49.315	3.6e-161	WP_117017508	type I restriction-modification system subunit M [Aeribacillus pallidus]	MNNNDLVAKLWKLCDNLRDGGVSYQNYVNELASLLFLKMCEETGQEDDLLPEGFRWADLKAKIGQEQHQFYRNMLVQLGADDHAIVRAIFQNVNTTITQPAQLTELVSNMDSLDWYSDEDGDKGKSRDDFGDMYEGLLQKNANETKSGAGQYFTPRSLINTIIKVMQPQPREIIQDPAAGTAGFLIEADKYIKSNTDNLFDLPDEDQEFQMKKAFVGLELVPETRRLALMNCLLHDIEGDENEGAIRLGNTLGSAGENLPKANVILTNPPFGSASSTNITRTFVHPTGNKQLCFMQHIYDALEPGGRAAVVIPDNVLFEGGKGTEIRRDLMDKCNLHTILRLPTGIFYAAGVKTNVLFFQKGTPENPSQDKDCTKETWVFDMRTNMNTFGKRRPLTEKH…
1	1941	GC_00000072	other	emors_8_2	81310	37.1	38.1															MKPINYVIAFLFLFVQPSYAFEHSNANPGSAEFLIAACQEYTELYNKKDEQGFGTFFTTSKEESFRAGYCLGAVMHTNSKCSYPYTYTPSVYQAAKVIASVNVKQRYSETKLLEDAVCR
1	1947	GC_00000073	other	emors_8_2	81310	37.1	38.1															MIRSGNQYGCHFRFNNIKNKIRTLARVMQKNISTASKIWHGTKLFIKWFWLMTMFLLGVSLLLVMPLIMFEYSFSLSELDLIETLFIVFLVVFIYQYGKRCRQIDTPLVRKIITPWVHQAHIFLVFYSLTLISAPLLELNLRELERMPLLDLFGYILMAGTFGYSYYLIGLFAKKTVETVEVITTEGAVE
1	1953	GC_00000074	other	emors_8_2	81310	37.1	38.1	K15045	radical Sadenosyl methionine domaincontaining protein 2									40.418	2.33e-71	RGE41128	radical SAM protein [Comamonas testosteroni]	MNQANQLVINYHITEKCNYDCHYCYAKWAKPNELHRNVDDMKKVLSNLAEYFLSPNPIQKQLQYQSVRLNFAGGEPLLLKQRFIDALDYAIELGFEASIITNGHLITDQFIIEHSHKLQLLGISYDSYNAERQQQIGRVTPVGKVLSPERLQSIFKQIKRQSPTTELKINTVVNQYNTEEDFTDLITKIQPNKWKVLRVLPVFDSIEPIKDQQFDAFVERHESVAHFMSAENNDSMTNSYLMLSPDGVFFQNGNDELGYFKSRSLLTTPVDIALGETGFDAAKFAQRYQ
1	1959	GC_00000075	other	emors_8_2	81310	37.1	38.1															MSLVTTNQAVKDLFGIEGSEPLRSKANSYLRNGVIPSSLVIDDGFSDESMGKRGKKLLKSQAVNCLFNALVLDAFFNDTKFVKAIFEQSRTRVASVALCEEVLLKAQAVATVSHLSNLAQQFLSQLKDESFNLREYRLTCPFDDQRLPQMDMALQNTGLLYQLLRAQRLSLSHKEQIWLCWLEQDLAAASQLADQVDSALLETDMALKEMVKRAHKEYQEAQSFNALLSSLPD
1	1965	GC_00000076	other	emors_8_2	81310	37.1	38.1															MNQQQITVKSGAKIKIITPKAPPLIINRAKKLISKIFVQDILRGMRPKVIQRNKKWLSYRVNRKYRLLVLRTRCNTGPYYCLSHTEFDHWVNNH
1	109	GC_00000001	flanking	emors_8_7	87652	36.6	38.2											47.917	1.71e-27	RGC81918	PTS fructose-like transporter subunit IIB [Hungatella hathewayi]	MKIVAVTACPTGIAHTYMAADVLKKAAAKLGVSIKVETQGAMGVENVLTPVDIVSADLVIIASDIEIEDKNRFLGINSKQFPIETILTDVEGILKKHLF
1	110	GC_00000001	flanking	emors_8_7	87652	36.6	38.2	K11203	fructoselike PTS system EIIC or EIIBC or EIIABC component									61.611	0	WP_117709256	PTS fructose transporter subunit EIIC [Fusobacterium mortiferum]	MDITSLINANVICLDLKSTSKEDILQEMVQILDDAGKLSNKTQFLADVWAREEIGNTGFEDGIAIPHAKSSAVLTPSVAIGISRAGIDYGAEDGEPSDIFFMLASTDGDDNQHIEALAQISSRLIEDGFTNKLKKANSKEEILDLFTDIIQPNTESTDIENTPPQTEKSELTRKLGRTKEHLLFGTSHMIPFIVAGGVLLSLSVMISGQGAVPTEGILADIAQMGIAGLTLFTAVLGGYIAYSIADKPGLAPGMIGSWIAVQQYNTGFLGAIIIGFFAGFVVRSLKKIKLPESMASLGSIFIYPLVGTFLTCAAVMWVIGAPISNAMAALNEWLASMAGSGKIALGAILGAMAAFDMGGPINKVATLFAQTQVNTQPWLMGGVGIAICTPPLGMALATF…
1	192	GC_00000002	flanking	emors_8_7	87652	36.6	38.2	K07001	NTE family protein									30.759	3.13e-100	WP_119143698	patatin-like phospholipase family protein [Pseudomonas reidholzensis]	MRHVFSLNLWFVFLATFLFTPYLYAEPIKESSRSKIALVLAGGGAKGAAHIGVLKALEELNIPIDIITGTSMGAYVGGLYATGKSASEIEAYLHTVDWYSGYQDEVGREEKNIRDKKYEDRFAINPSLGIRKEGVKSPKSAIQGQNMLKILRETSGNPVSVASFDDFPIRYRSVATDIVSMEEVIIDHGLLVDAMMASMSVPGALPPYEFEDKLLIDGGVTNNMPVELAKEMGADIVIAVDISSNYMTKEQIGSLFDVASQLTNFMVKRSTQEQAEFLTDKDILLQPRVGDIETTDFLSMPRAYQEGYDTAMTLKSRLKSLAVTPSEYAQYSNKKKQQSANVRLAQGTIIDKVEVENRSHYESDKLERFIQFEKGTSLNSDYIEDKIHALYATNRFETI…
1	261	GC_00000003	flanking	emors_8_7	87652	36.6	38.2											30.097	1.17e-08	WP_116986099	phosphoenolpyruvate--protein phosphotransferase, partial [Escherichia coli]	MELNTIDYRITFFVKDQGLPPQVASQLTRLAKKFKSLVYIDNITQNRSTNAESSLGLLQVGLCPGDFCQLITVGMDAEWANFVLTDLLSSTFDFVASDKLCDFSETITNTYPQLTPQCEVDFHYVKAQAVLSKFEILKGLSQLIYPKESDELLLALIKREERSSTAMAKQIALPHVISPYVEKPTIAIIRSDYPVDWASKMGDVNVIIALVLPEKPTKEMIMAATYLTRSLLSEDFSQRLVHTRQPKGLQALILYAMCQLL
1	329	GC_00000004	flanking	emors_8_7	87652	36.6	38.2	K01809	mannose6phosphate isomerase [EC:5.3.1.8]	M00114	Pathway modules; Carbohydrate metabolism; Other carbohydrate metabolism	M00114	Ascorbate biosynthesis, plants, fructose6P > ascorbate					62.148	1.36e-173	WP_005478337	mannose-6-phosphate isomerase, class I [Vibrio parahaemolyticus]	MNALKPQTFYPMTNVIQDYAWGSHTSIEALFDIKNNTGKPQAELWMGAHPNGCSAVTVNGDSVLLSDLINQDKEAFLSKTTADAFGELPYLFKVLAAEKALSIQVHPNKQQAVDGFEKEEKTGIALTAFNRNYKDNNHKPELVYALTDYKAMNGFRDYQEIVSLFSAMQLPTIASYVDELAQEPNSNGLQRFFKAILSLENETKERAVAELLDYASSSTDELFVLLQDLAIQYPNDVGLFAPLMLNVITLKPGEAMFLSACTPHAYIHGTGLEIMANSDNVLRAGLTPKYMDIDELMSCTEFVSQPLSSLLTQPNTVDGGMSYPIPVNDFKFSVFTATDALTLETNSAEILFAIDSDLTLTHENGESVTVAKGHSVFVPAYAKRYSLTSNGNVARAYN
1	395	GC_00000005	conserved_T6SS	emors_8_7	87652	36.6	38.2											50	4.43e-11	P96156	Chitodextrinase; AltName: Full=Endo-chitodextinase; Flags: Precursor	MIKLNKITAAITSVMFSGYLYAADASATSNLVTFVPGETKVQNGDMVSFNGDCFVAKNNPGVWESPTADSWFWDVAECSGEPNPGPGPNPGPNPTPDPDLGDIIPFIPGKTQVENGDVVSYENQCFIAQNNPGVWETPSASSWFWTLTECSDEPVNPEPEVTELSILAPIAGQVLTANEAISINAHVDGNLAAKVEFWANNTKLAEKTVNQNNTQYSQTWTPSEEGNATINVFVFDKNNQKIEQKSVSVTIKAEVTEDFVAPVVKFVTPTNGSTMNVAESLSISVNATDADNDLATLVVKANNKEICSFDAANTDTFACDWQPTQAGNVTLNAIATDAQDLSSTATVRITVEEDVVEPPVEPPVTPGDLCKDFNVYPDWTRGDHATGGDIMVHDNIAYS…
1	440	GC_00000006	conserved_T6SS	emors_8_7	87652	36.6	38.2	K11892	type VI secretion system protein ImpK									24.8	1.8e-08	WP_010910863	type VI secretion system protein TssL, long form [Mesorhizobium japonicum]	MSYVEDDVTVVLFQPEPGKPMEVMPAPDLSRNISVSELDISSMGINPLVDQFSWLIASLSCMSSIPWLDDPMPFREQVAREIRKGERMLNEMEVDRASILVIRYCLCAAMDESVCRQEWGANSNWSQNSLLSEFHNETSGGDKFFVILDRLKADPRKYRHVIEFLYLLLQLGFKGKYGRAERGAESLTEIGNTIYRLVRDERLAEQEKVALVDVKSKYLKKPLKRVLPPKLILGVSALLFAAMYAATYLVIDVRFQKLLSLYQ
1	479	GC_00000007	conserved_T6SS	emors_8_7	87652	36.6	38.2	K20276	large repetitive protein									41.606	9.19e-98	WP_011105819	hypothetical protein [Vibrio parahaemolyticus]	MTIFIVIFTIYMVYVSRCHLFTNKYNACSLITTTRFYIFMRIFSFLKLFAGLGLILLISSCGGESKDTSPPKRETTSVSGILFDAPIAGARVVLWEYANGAIGKKLGETRTSSKGDYSMEVNSGSMPVLLQAFGGAYTDPATGEVVYEGDGKTLKFESTAYFYENKANRIMLTPLSLISKGLADYKIHKLGMDAKGAIDSANSTISNMYGFDVITVEPIDIVKGGQSAYVTAGHQYGAYLTAYSVFSSDLIKKYPASDSSSIYTSFTLSDIMYRDISADGQLDGYETDNISGLDKKISFGKESVSVETYTNILSQYILITVNNNRLNVSGTNPNDYKPFASKVNKLGTTPETMTVFHPRTEVPIDDTEPTVERSDKDVLVRLDSLDLLVKDNVGTKSLR…
1	518	GC_00000008	conserved_T6SS	emors_8_7	87652	36.6	38.2	K11906	type VI secretion system protein VasD									26.984	4.76e-15	WP_010910850	type VI secretion system lipoprotein TssJ [Mesorhizobium]	MRKLLTFSLIFLLSGCTMWDQFKESTGITPETSSIELIITADKVLNVREGGQSSPVILRIHELNSPVLFRNLDFFALFENDKDALGDEYIKRYEYQIQPGDVVHETLVLDPATRAIGFSVAFRDINGSSWRKVELIEEKSEYFLKLNLKESELSSNNTRGIEQIYF
1	556	GC_00000009	conserved_T6SS	emors_8_7	87652	36.6	38.2	K11893	type VI secretion system protein ImpJ									33.107	1.16e-83	WP_005463797	type VI secretion system baseplate subunit TssK [Vibrio parahaemolyticus]	MSLYNPVVWQDGMFMKPQHFQQLDRFQGKQSGMLSGFESPLHWGIKRIEINTELLALGKIGITHAEGILQDRTPFDLPLHASLPEVKDVDASVANKVLYLCCPLPSERSELFGTSKDGARYSIHTQDAVDACYDSEEIANITIGKLNFCLMYEDEDKSAYTSIPILKISEVKPDGSIILDNAYIPTCIDINASTVLKKFTTEFASMLRHRAESIVQRLGVVDQQGVSSVSDFMLLQALNRYEPLFWHFANIEGVHPEAFYRVLLQAEGELATLCSSSRRPQEFVPYNHGNLTSCLSTILHNSKVTLSVMSEQRAIPLPLKEQGYGIRIAPISDRSIVESTTFILAVKADVTLDILHTQFVSQTKIGSIDNIRELINLQLPGINIKPMPVVPRALPYHAG…
1	594	GC_00000010	conserved_T6SS	emors_8_7	87652	36.6	38.2											66	3.26e-97	WP_011105828	hypothetical protein [Vibrio parahaemolyticus]	MAKPIQLGFMALIMACSLPAFAKGERYGIAANFKTIESTEYEQGMSGELSTISYGLVHTRPIDENNNRWRWLFGFNYLSDYIEAPANGVYQEVTNYEFRIVPQYALGNWWAFTPYVGAGLSLGYSQYGNRWKVDDEGYKYGNQLDDIDQFEVGAVLSFGTVIKLGSNPDAHLQIIPQASYIQPIYNDGLGGLELSVSLLF
1	632	GC_00000011	conserved_T6SS	emors_8_7	87652	36.6	38.2											39.13	0.000488	WP_117539334	FHA domain-containing protein [Coprococcus catus]	MHLNQLTLFITKSPEEYTGSKHIEMPEGGGSLGRNPSNTVSLVDHNRFISGSHCLISIYGDTYYLSDVSTNGTLVNGNKLLKNQPISLYDGDTIVLGRYEISVGLEKLSNSVNIAADISEETDSTDPLVNLAECTPDEEQDKGNIADLFKETRIDKVDSSDPVAHLNFITQTNNDDHLLHGNEKKHEQKINEPVHTRQLLDDSDSVHSEFDVPNLIPEDWFSNDLANTSMPPVQIDEPIATSSESESESESEPMVHSFVDSTPETIIPSVTEQLAWEDVTQTIQPSVSTTEPKSDEFFIAPSTSMDVYPSQSIETSFNSKMSDDAASAFYKGLGMSASQIEQTDEQFFQQMGNCLRLCINNLQKELSELKAIKNNEQDDSMTNIVELMLSLNHQQLLSP…
1	669	GC_00000012	conserved_T6SS	emors_8_7	87652	36.6	38.2											30.882	1.68e-20	WP_116949140	Lrp/AsnC family transcriptional regulator [Jiangella endophytica]	MSNMNLQGLDKLDRRIISNLLSNGRESIANLSRNVGLSRTAVAERINRLEKTGIIKGYTAQIRMGNKDENASSYLLISCNKGQKDSVSDGLKEIPEVKMTSIVGGTYDIICLIEAPDLHRIHYLCSEIESLSGIKEVKNTIVLHQPVCR
1	705	GC_00000013	conserved_T6SS	emors_8_7	87652	36.6	38.2	K11901	type VI secretion system protein ImpB									40	2.67e-32	WP_117580760	type VI secretion system contractile sheath small subunit [Enterobacter]	MSRDGSVAPKERINIRYVPATGDVQEDVELPLSMMVVGDFTARTDETPIEDRTPINIDKDNFNDVMEGYSPNVKVNVDNKLSDEEGAQLGVDLTFNSMKDFSPEAIAKSVPELNGLLELREALVALKGPLGNVPAFRKKIAAVLQDEEARQKLLEELNIGSAKEEAKAE
1	741	GC_00000014	conserved_T6SS	emors_8_7	87652	36.6	38.2	K11905	type VI secretion system protein													MEKGYRLLERIELGEPKNCYEKVVSHKHLIESIHLHLADLLNTHAGNAMIDNDYGLPDFNDVLSNNTNLVRNIQQNIKVSIEKFEPRMRNVEVHYRHDNNNPLQLGFGIGGEVIHNGGKVPMAINIFMGVDGQFNV
1	777	GC_00000015	conserved_T6SS	emors_8_7	87652	36.6	38.2	K11900	type VI secretion system protein ImpC									60.288	0	WP_117611541	type VI secretion system contractile sheath large subunit [Escherichia coli]	MTAEAQAPEQEAALVESGSLLDSILNETRLKPSDEGFDVAKRGVEAFIGELLSTNTSDKVDQSLVDLMISEIDQKLSKQVDAILHNEEVQAIESTWRGLKYLVDHTDFRENIQIELISAKKDEVLDDFEDAPEVVKSGLYKQIYTREYGQFGGKPVGAVICDFQMSASSPDIKLMEYMANVGAMSHAPFITSASAKFFGLDSYEELPNLKDLKSVFEGPQYTKWRGFREHEDARYVGLCTSRMMLRTPYSVEDNPIKAFDYNEHVKDGHDNYLWGNSAYAMASKISESFAKYRWCPNIIGPQSGGTVSDLPVYNYESMGQIETKIPTEILISDRREYELAEEGFIALTMRKGSDNAAFFSANSVQKAKVFPNTPEGQQAEMNYKLGIQLPYMFIINRLA…
1	813	GC_00000016	conserved_T6SS	emors_8_7	87652	36.6	38.2	K11903	type VI secretion system secreted protein Hcp									52.326	6.63e-65	WP_137712216	Hcp family type VI secretion system effector [Brenneria rubrifaciens]	MPTPAYMSIKGETQGDITKDAYSADSVGNVWQEAHVDEFLVQELDHVLTVPRDPQSGQPTGQRVHRPVVVTKQQDRCSPLLFNSLVSGEKLPECNIKFYRTSTSGKQEHYYTIKLIDALLVDMQTRMAHCQDAAMSDRVTEEVLKFTYRAIEVTHETCGTAGNDDWRTPREA
1	849	GC_00000017	conserved_T6SS	emors_8_7	87652	36.6	38.2											45.455	5.7e-08	WP_117031792	DUF2169 domain-containing protein, partial [Klebsiella pneumoniae]	MQLWDIDSESPFTLKGRFQRDSEGHEVWVLSMKRAWTFLDGSWSEEVDNLELNDDPIYLGEPGFSAMVADHDFPIYKKNTDVLIYGKARSYAKKPVHSQLCRVLIDEHIDKTLKVVGERHWVDHSGSITVSTTQSFIERDIDYSNAIGGDERNRIGGGAAETNVELLKAKVPSIFYPDQNWQASSKKVKVAGFGPMPPFFHDRAKWAGTFDEKWFEERRPVWPIDFDDRFYQSAPQDQQCNGYLQGGERLMVSGFCHNDALSFRIPSEKFQAVAVFNGKEEKINMPMYTLWIDTENKRIEATYTAAFPCQNREHLLTSSYLVELP
1	885	GC_00000018	conserved_T6SS	emors_8_7	87652	36.6	38.2	K11895	type VI secretion system protein ImpH									32.344	1.6e-54	WP_000348794	type VI secretion system baseplate subunit TssG [Escherichia coli]	MIQYIVNKPCDYSFFQAVSLLEKHYQNLSGIEYKAIGENQYVKNEYIQFSVSPKLSFPKSDIEFITEFERNDATYTQIEVNFMGLHGVSSPLPASYTEKLAGRDPDDNPVKEFFDFFHHRYISMLYRVWKKYRYHIQYKSDAKDPFSGRLLHLVGLSSVIQESNEVDLDRAKLLSYVNQLSTRTRSPKLVSGIVSHYFSLSNVYIEEWVYRRITIAASQRNFLNRKNCQLGGDFHLGQSMADLTGKFNLCIDDIDFDTYVKFLPGGALHETLIGLMKFILCDPMAWDLKLTVRNKSLPINQLGDGLGNELGQTFWLGSAKGEETKIKIVGSN
1	921	GC_00000019	conserved_T6SS	emors_8_7	87652	36.6	38.2	K11914	sigma54 dependent transcriptional regulator									41.463	2.36e-77	WP_126397535	sigma 54-interacting transcriptional regulator [Blastochloris tepida]	MSLAKSDSLNNALLAISQSLADRSQLALTLDAILAAARQLTFADHGIIYVLDQTGQALLPSVVHHNEHILAEHPWQPLTLESIDETDPFSFAIQNGEVVLINDLYQYNGYQCDEIYQNESILNRKSKNLLAWPLIDNEKNTVGLLVLFDLNVINDEASLTCFCQMAATNIRQAVWLEKYGYMIKELSEDNASLTRENNQLKQRKQSQYSGPIAESEVMLNALARLDKVLSLPVDVLIRGETGVGKEVIAKYIHENSNRSKQALIVQNCAAIPEQLLESELFGHKKGAFTGADKDKIGLFEAADGGTLFLDEIGDMPLLLQAKLLRVLQERKFRPIGGNKEISVDVRVLAATHANLMEKIKKNEFRADLFYRLNVFPITIPPLRERTEDIIPLSEHFIKL…
1	957	GC_00000020	conserved_T6SS	emors_8_7	87652	36.6	38.2															MKPYLLLLPAALVVAGCSNQTSVPDPLAPYKNVHIIGNKKQSIGSFNYLSKDVDGYTDKQVIVYFNEIPFTSTFNLCADKGVYIANCKSTVSIFPSKNKGVIFNYDLNFYNGSYPARVGSMNILLPSTTTRKMDNLTQYTSAKFSEEQFLESEKLEEATFILMKSS
1	993	GC_00000021	conserved_T6SS	emors_8_7	87652	36.6	38.2	K11891	type VI secretion system protein ImpL									22.985	1.62e-68	AFJ27267	IcmF-like protein [Escherichia coli Xuzhou21]	MIKNTLARTPFILSTVISAFFALLLVGVYYLWFNQADLRLLWGMLGIIFSIYAIFNLTLYIKKRKNKSHQNIETEEDTLSMVLKPLLHKAGKKPVYLVLGNKGSGKNQFLNVSNAIKPMDKVKNVKNDFFEWSESDSAVYIKPNHRLTFQEISSNDSLLWDALINEVIKHKPRKPFAGCMLLIDFEFLIVHDDEQTDYTLNALLQRLESIKETTGATLPLYLIMTKLDKLEGFKEYIHFSPLKSSVEFLAIPLKDAKGAILDYFRDSYKNIVKVMESNALDSSSYTNNPDEKQTILAFPKQFELCEKEISRIIERLNELNQGTYSIDIREVFFSSSLQGGRKYNLLAKSCSNYFNLPIIASEHGQLTETPYFTRFLVDAKVLPESDYSAENQHYLKRIQ…
1	1029	GC_00000022	conserved_T6SS	emors_8_7	87652	36.6	38.2	K11896	type VI secretion system protein ImpG									32.241	2.28e-90	WP_117681754	type VI secretion system baseplate subunit TssF [Klebsiella pneumoniae]	MSNSKYFQDELTYLKEAGSEFAKYHPKLTHFLSEGTFDPDVERLLEGFAFLTGRVREKIDDELPELTQSLISLLWPHYMRSVPSMCISELVPHSGSVTEKIIVERGAEMASEQVEGTQCQFRTCYDVALYPLSIQQIEQNNSRTNSSLHLTIAANNGLELSRIKLDTLRFHLHGEQHITRSLYLWLFRYLEYVELDVGGGYKHRLRADQVIPVGFGDDEGILPYSKNSFSGYRLLQEYFSLPDKFMFFDLKGLEWLGGIPQRSTVKISFAFSRALPSEVIVKNKHFKLHCTPSVNLFEKDGDPIRLDHQLNEYKVRPQSSNQEHYEVYSVESVESWSKAERCRKKLIEFESFEHQINQRDKRDFYKTKVSERINGRGLERYISFHSHNNQVSELGSETV…
1	1065	GC_00000023	conserved_T6SS	emors_8_7	87652	36.6	38.2	K11910	type VI secretion system protein VasJ									23.518	4.86e-24	WP_119144555	type VI secretion system protein TssA [Pseudomonas reidholzensis]	MASLNFESLLKPISEVAPTGEESKYEFCYELMELEIKKFGSLFGETVDWKVVETNAIEVLTTYSKDLKAICYLIRALIERNGFIGLDEGLNLLKQSLVLFGTDLFPQRKRARDGAMEWFVAQLETTLPKLDTSTTNWESVASYLQRINEISDQYHEAFSDSDVEFYLITSVLNGISQRVVGVSETNTNTSVKMTSEPEPLVEETTSAVTEVKTLSQVATKVPKTVNTVKQEVDIDTDFSSPSASKRTLKKVAEFMLHSDISTPLAYRLHRNCTWCEVDELPPHDNDKKTPLSLAVSQDQLSEYRDKAKQETEAEVIKRLERTLTDAPFWLTGHYLMFQMLTNLDHHEAAEAVKQETQYFISQLEGIELLTFANSTPFADEETLKWLSSNTTTTPVAAVS…
1	1101	GC_00000024	conserved_T6SS	emors_8_7	87652	36.6	38.2	K11907	type VI secretion system protein VasG									45.504	0	WP_117580830	type VI secretion system ATPase TssH [Enterobacter]	MININLSSLIQRLHPITKVALEDAAALAVSERASEVQIEHFLLSLLERPNSDFDQLLAHFECSENLLRQAIKSTLENSHKSNGGKPVFSAMLIEWLQEAWLVSSLDLSETQIRSGALLLTLISNPLRYGQHGYSSLLENINPETLKRNFAELTSRSIESQVATSEQTHAREDGSALSKFTTDFTGKARKGEIDPVFCRDQEIRQIIDILARRRKNNPIAVGEPGVGKTAVVEGLALKIVQGEVPDCLKGVELYGLDMGLLQAGASVKGEFEKRLNAVLDEVKNSPTPIILFIDEAHTLVGGGNQAGGSDAANLLKPALARGEVKTIAATTWSEYKKYFEKDPALARRFQLVKLDEPSTEQAALIIRGLRAVYEKSHNVYVRDDAITAAATLSDRYISGR…
1	1137	GC_00000025	conserved_T6SS	emors_8_7	87652	36.6	38.2	K11904	type VI secretion system secreted protein VgrG									37.455	1.22e-117	WP_002213876	type VI secretion system tip protein VgrG [Yersinia pestis]	MVSDIEFKFEVLGTEHEFRVESFNVVEELSKPFHVSLSLLSLDADITFDELIRKPALLSIFGQGVGTARQFHGVVNEVRYLGEGRRFSRYQITLVPQLWFLTQRQDCRIFQEKSVVDIVTEVLDGAAVTDYRFDISALYPTKEYVLQYRESDSHFVQRLLAEHGLWYYFEHTTANHTMVIVDKNDAIAELENTPLNSSYVGPVIYQADGGGNADREHIFDLESINRVRTGHVTHTDYNYEQPRIPQKMESSGLIDTDLAFFDYPGRYIEPSQGLVRADELMAESVVDNYQIEAASNVMRLIPGYSFILDKHPRRALNRDYTILTVTHSGYDPQVHEDEANEMPTTYQNQFSCLPRDIEFKAPKIAAPVVDGPQTAVVVGPAGEEIYTDKLGRIKVQFHW…
1	1173	GC_00000026	conserved_T6SS	emors_8_7	87652	36.6	38.2															MVRLQLTNSIEVAGAIDENSQAESLACVPRFGKVISLHPTMPDRIYVEFDGLATGSTALAKIGRLFRKSELEFAIESGLTCRIEFLNGDITLPVLTDIFFSLLDDDQPVILRAKSLIIEAENELIVRSGATQTKYSGRDGRVTTQAKYITSQAEKAQKIQGSTIAVN
1	1209	GC_00000027	conserved_T6SS	emors_8_7	87652	36.6	38.2	K11911	type VI secretion system protein VasL									45.057	1.68e-123	WP_011105827	type VI secretion system ImpA family N-terminal domain-containing protein [Vibrio parahaemolyticus]	MLGLKFNMNLSDFARRPISIEMPSGINPNSLDDFSEIKREVNKLNTVTSKISWKHVFKLSKSILESESKDIRCACYYTVSATHIDGLKGLVNGLNALLDICVIYWHSGYPDVNKTTARMGAFEWLTEHAIKKQKTLKISPTDLVLIETGHKLTLKIEEELRSHYGNKSPSLGAIRRIFSQWIEEIQATKLSLEEQRLKKEAIEKQNNSGINVNVSLPPRDESKKTVQPTMTHTEKDKNIKPMVTISLAFIFILTLLFGHFLYADNQKSTLLINIQKADLTTINPLISQLENKEDDLKQYVKTALIKQALHLNKDWEVTSTKVDKINELETLNYSLKNLYPDSAAVKKLEYEFNQQRADFENEYSDIHQRFLKSRTIFANAKNHNSDENIVKAYSYSNSL…
1	1245	GC_00000028	conserved_T6SS	emors_8_7	87652	36.6	38.2															MSIYQHQYILDSDIVVPTGMNTELAIAIARADIDRFATFEDSNEKYTVASLEFVDQTCLMTKVQETLNVLITPLLDRLHISLKPLPLLLSVPQEISEHDLRNWIDESDFSDYLSNIKFSKNSGNAFLQECLNSLAEPDAIMCIAIDSLYEKKEALMSSRDAMSGTNPWGVLPSEGGAGMVLTKRNVLDTLKLIPQSKIVYSQFDWHSSDRRGCARLIRAASKHHDNLGPIYSDMTNQRAHTEDYGFAIGARSEVLPYAQQVTLTNEFWGTIGGGSGIATLATMNHLSTVGVLSTAFLFDQNNTRSLFILNREK
1	1281	GC_00000029	conserved_T6SS	emors_8_7	87652	36.6	38.2											30.526	2.07e-17	WP_138184353	serine/threonine protein kinase [Paenibacillus alvei]	MSELQGSTNDFINQLVVKAIEKKKKNEQTLANKLKPRLEHVLFSQFDVLETIESHNQKTTLYRLAKKDEPEKQICCKVLNSEQPEHVQEMFVAEATHLEVAQHPSIIDFIKLGNEFERPYFMYKWAEGESVAEKLTRHKYKSFRHDHIAWLIYQLAGALEYIHTKGICHLDIKPSNIIICEDDSIKLIDFGAAQYINDSRKYNEASLSYASPKYIESGKAVPQDDVYSMALLVCALFTGYSDNNDWKALLQQRKRPHTIPKTVWNLLRLVVTKPRTHGLTPISFAQALAHIDMNVMQGSHNAPLFTQLRNADLVLRKSSKYDVFRLGRFKYLEASLAACLCLITFTVLLKSFAFTVADNNAVSLSDTSSRIKPAQAATFLSQPPWEIENALDNNSSDVV…
1	1317	GC_00000030	conserved_T6SS	emors_8_7	87652	36.6	38.2															MNRYRYLVDDVKKTLTDADKQQAIADIALAQEQLSSFSENMVNFLYTKAILAAETASFYIKQQYRFHQNGYPAKEIDYLTLLETQLSEIEKVFIALLRIHRGFVYVVYSEYPEVLAWLCLSKNIESQHDNDELTLLGISIIDQLDPELAMPLILRSNSNHIHKLLACFIEGGASKRELYYRCLVINQSVSVSLIKHWLEDKKLPEKMLHSYLALMNVGSSIEWLQELTNVDDLLFENLILKEDRATWFRQQYSVDTISSETANTYSKLLTLKEFSLFDIEKEQAVIHFILSGDTELVPLIIEHLMQLDEVDAQLWCEGLFLVYGEEFPFLPSKLGNTIEWQDALHEIVEWQEQIEVVKSVPLRMGQKLTFDSSIRAMKSSELSSSLREWLWRELCIMSR…
1	1353	GC_00000031	conserved_T6SS	emors_8_7	87652	36.6	38.2	K19304	murein DDendopeptidase [EC:3.4.24.]									34.545	1.01e-39	WP_116986330	murein DD-endopeptidase MepM, partial [Escherichia coli]	MKLKYLTFISINLAFIILSISLLYFSSNHSSVINGSQLSTSPQKNVFDEKKQKPDNLVINGTIKDSFFSSALNAGLTSKQIFSFTEALHNSVNFIDGIEDGTPYSIVLDKNTSHIRSFFYTENNRLHTIQLGKNGLYYNELGVNLSSNKLILPTGNLFRISSHFSKKRKHPVVGIVQAHVGTDYATPIGTPVMSVSKGIVSRSEYHPLAGNFISIKHNNGITTRYLHLNDRYVNKGDHVYKGEIIGKTGNSGRTTGPHLHFEYIVNNIPQDFTKLHNNIEMPLNNKNQKKLLKCINLSKTLITKILKEA
1	1388	GC_00000032	other	emors_8_7	87652	36.6	38.2															MKKILLLALFSITLMGCNDPESAAAEASQLRAEQHPERTYVGEHNYYIMESSEHAAFGRKKELKVMYQDFPRYFVEKAKEWPKEDLNDASSYDLPRFQFAWANSSSEDEYESGLKIWSMKTDGTDLRLVTDATIDLTAVRNLTRSPNNRYVAWAGSGGHKSVYDLKTGKVSDMHKFTSPLDMLWSEDSRYLYFDDAINSYARWDSETGEVSDSDLKVRTEAVLTENKIIKVTDAAVVGYNLKTNERLFVLSSDRSLSDKERIFNVKSISPTGRFAWGSNQDYGWLFDTKEQTMKQMVDDFVPAQILGKDAHYSALSKMTYVTIVDRVEDKVWSWRAFSHGAMSGEGVLYNGLANNGLWFKEGK
1	1422	GC_00000033	other	emors_8_7	87652	36.6	38.2							EFF01293	41.594	1.63e-155	NA					MHFNCKLIPSSSLSHKELEYILTPDEYVRLLSREKNSQNIINQLPVQLRQSLSISASKSVQSLLFSLNQKLTKAEWIAVSTTVRKTGLSDTQLAQYPQLKKQIDRVETTQPAKFVKANFKPVTDDVPLVRNLSFTPVNPSPEHKISIEFAGQWPNNAASLLLAKSGEQKEKIAKPRADIHASHRSIATFKDLEPEPRNLYLTIPMNGTPQPLKLLLAENIQPVDKETEMDEWDTVLVPVVPMKKLGEEYSLRQTGYFYVIWNGKVWREITIDSNGYFCDLDIQHERQEPLPTRHVNINASEFFPEANMSFEKFELYQEGQKVFSGELDVCEQSRVFNLVAEEVELKFVDFDHNEILLTTFESPIKNSASNERQAMSYPMPHVWLPYKLLGEVQADCYVY…
1	1455	GC_00000034	other	emors_8_7	87652	36.6	38.2															MSALKTYDHGIYLLGAYFTSYLDEEGETVETTWHQSSDVTEANLHNVRPIPFTPVLVDDAENPFLWGTNKDGLLCQLGYSDENTAPETVAKKQTFLRHKQPLTVSELNLDKPYSLMFPPLNVIGQLAETHANVKALNNALTDIYSNKLKLKNKKPIEFTISKISVEQLAEPYKKESDKPLTDEQNDYNDWYEKIKKSKVTEIQGIIAPVYHSLGVVFSSDLYVGAEVSLIQVKSKQDSSGEAEDVLATSFITKPNPNQEKTDEAKATLPSVVFNFDPTLIDDGYFLLRTRFWVKDYLDKQKEILEEGIDAIFPDSVKQGHLKFKANDTRPGTDFTQDVYTYELHEKVTFKPISGFGKLAMVCGDLISLEECLIYQYPTALPSYSDFMTQQGNPVALKGT…
1	1486	GC_00000035	other	emors_8_7	87652	36.6	38.2															MAIQFTSIVESGRFKDRKFARLVLNTIILIIVLMVMTLEILDDYDILDIFNDIQDNIIAFTTLCYMSALYSYGYQLPLFKHQWQVFLILYLTLAQAVYVLGYLTYTQYDQHSIIYLLSYCLFWSLFYGYLIYTINNLKNDIK
1	1544	GC_00000037	other	emors_8_7	87652	36.6	38.2															MCKQTNYSKYQKRVIKFLNDLLGADTPFTYERANNNHLKVLIDGVTKPLFTGSTPSDCKSINNFMAEVKRELKASKKEESKLSQPEKTGVVSAVTLSNDKLIQNCVKSLRTRITVLKEQEKESVLNNKCINGLNLKRIEIVKHSVSLALQARKQGTYLKPKELRTIEGMVHNHLNFMLPSMAYYAELLNSTSKDKLAKVQPNKQQASVHNESNKNNVISLEDKTQHAPTKEAKKLAKKPKQPVSNKNMNTKNSNSATELMAMSANNRVSLLRNLTKAQALMLIDDINQAMAANREEDIEAVIALIRDKDLPLDAIISRMEAA
1	1570	GC_00000038	other	emors_8_7	87652	36.6	38.2	K19135	CRISPRassociated protein Csx14									30.132	2.1e-20	WP_116935424	CRISPR-associated ring nuclease Csm6 [Verrucomicrobia bacterium]	MKNILIAVTGASPQVLTETIYALHTQGKPMPEVVYVITTEDSKQTLKEGLFVQGYWDKLMTDYQLPPIAFNSDHIWVITDDNGNALVDAKGVDDQSIMADFITRKVALLTQDNEVAIHASIAGGRKTMAFYMGYAMSLYGREQDVLSHVFVDDEFEFVSDFYYPTPVDCFIQGKQGEAINAKEATVTLAEIPFVRMRRQVDECIINQMETHSFSKTVSALNSANNTQVRVSISTKEKTVEVAGVKIPLTSKHLAIYLFFLSKDNRKATLDRYFEDDKTQTTDYLGVLDKMKADVRLYKTMGLEDEGQWRQKDHAELATLTKDFVRQSLNGLHKSLKDKLVPDLFEKIKVHSDGVKSGATYQISTEVLFICDDIEL
1	1636	GC_00000041	other	emors_8_7	87652	36.6	38.2	K03427	type I restriction enzyme M protein [EC:2.1.1.72]									52.591	0	WP_117002891	type I restriction-modification system subunit M [Cysteiniphilum]	MLTGQLRNNIDTLWEKFWTGGVTNPLVVIEQISYLMFSRMLDMQETTAERKAKRTGQAFTRQFPETPEGQLLRWQNFKNMSGKELLPHLRNNVFPHFSQIELNGSDIAQFMADADVEIRSESVLLSAVEMVDQLPLDQSDVKGDIYEYLLSKLASAGINGQFRTPRHIIDMMVEMLDVQPTDVICDPACGTAGFLSRTMEYLTRTHTSPDSIYQDEDGNDVYTGDLLHEYQDHINNKMFWGFDFDSTMLRVSAMNMLLHGVSSANITYQDSLNKNFAELPQEENFFDKILANPPFKGSLDEQSVNPNVLATVKTKKTELLFLALILRMLKLGGRSATVVPDGVLFGSSKAHQDLRKELINNNQLEAMISLPSGVFKPYAGVSTGILIFTKGGSTDNVLF…
1	1653	GC_00000042	other	emors_8_7	87652	36.6	38.2	K01153	type I restriction enzyme, R subunit [EC:3.1.21.3]									33.391	0	WP_117002890	DEAD/DEAH box helicase family protein [Cysteiniphilum]	MTTSLNFELIREHNDKLTKLGSLAEQILHLDPGSAITRLRGFAEEVTKEIYAIEALPRLPQANFIELLKNDAFIDATETRLRDQLHFLRIEGNETAHGGDGSIKKAYAALGTAHSLSQYLAINYYGFRVADLTDLVYPEKPSSSALNQKQLEKVIEENQKQQDLLLQELERERQKRIELENKEQATAEQLSQAKSRSKQTANSLEWDENKTRQLLIDSQLAQAGWDINNPDSVGIEVKVSHQPTKSGTGYIDYVLWDDDGTPLAVVEAKRSREHIQKGREQARYYAEGLAKEHNCLVPIVFYTNGYEICIWDTKQYNTYRQVFGFYSKDSLKFLQFQYQHKEPNLELLNPSSDIAGRPYQIEAIKSVTSQLQNQRRKALIVQATGTGKTRVSIALVELL…
1	1749	GC_00000049	other	emors_8_7	87652	36.6	38.2															MNKYNDEYYIVFENYNNETLYLSPLQKTFDRNYTYTKINMGQEPLFFENAYKDKDLLNSIQRPIKNAHLNLNYPIVSNKIKDDINNFEIDNFQLYPTVIIDDNGDFYDNFWFFNIYNKIDALNLEHCIIDDYDEDDKRHDIDKYYLDVNKLNSIQEEKRLIFIPEKASGAPVFVHKKIVDIFNKHKVDTLKFIKVSEWKMGKQF
1	1750	GC_00000049	other	emors_8_7	87652	36.6	38.2															MNNYNEDYYIVFDNYDEDTLYLSALPKTFNRNYEYTKMQFGQEPLFFNNAYKEKDQIIGKKRPIKNAHLNLNFILVDEEIKENLNYAENKKFQFYPAVILSDDNQYHENFWFFNIFDELDCLDINKCIIDDYDEDDDEHDIEKYYFDYEKMEKIPENERLIFIPKKTNIGYTFVHKKVVDIFNKHKVDTLKFIKVSEWEMGKQF
1	1792	GC_00000053	other	emors_8_7	87652	36.6	38.2							EFF01536	44.28	1.45e-117	Toxin PAAR-like domain					MGVTVAANGLSVVHQGSGGEANATLPDVCLTKVGKPIVPIPYGNNAKSADLAKGTTTITMDGGNPVAIKGSTFSKSTGDAGGDKKGVASGTIEAEAEFISASPTVKFEGKGVCRLSDQMTMNKANTMCLGGAQNPSVSVTAEEEGTYTVDVSCFYPDGSAFKNAAFDIVDPNNSVLGSGTLSANGTGSASGIPAGQIRIIYQESADDFIVQSPRSVNPHYREKLTDDVFFDLAAQGKQTFWQPARMQTVVETWGTMRKTLSSDPYFYNIVELETKSHFNHQHSNYSFSTLAEYILANVDSKDDSCIPKLIAQTLPLILDEGEILSTLLLLPKHETTNHFLAYMRARGKGNPHAYLQNYEWSKAKQLLNNELEALLTEIKLRIQSLGSEADRLNYSYLSK…
1	1801	GC_00000054	other	emors_8_7	87652	36.6	38.2							EFF01800	35.965	2.8e-42	Toxin PAAR-like domain					MSIINGKMTSQQEESESDFINGTVEKKGYRKRWVSKVKKISNHPFNHGIHMDTHHLISAEAVKISSLGPLLEKKGYDINALNNLVGFPATLPGACQLHCQLHRGDHICSEEPYHKYVSARISKLKKKINSCYGKTEKRETTHEIHSNIMDPISVKILKKINEFKLPLTDIYKNFQKKGVGCVMCDSIVSARTANKSCSTRKHYKSLSANRSGVDYRYPNKKDNFIRGNKKEITFVQENWEPKVGQ
1	1826	GC_00000057	other	emors_8_7	87652	36.6	38.2	K06940	uncharacterized protein									46.25	3.26e-21	WP_117611299	YkgJ family cysteine cluster protein [Bacteroides ovatus]	MPFPCTGCGLCCQQIHNIVELQEYHSGDGVCIFYQKQQCSIYQNRPIVCRIDDAYDQIFKTRFTIDEYYKENAKICNQLQMNAAMDAIYKVRL
1	1834	GC_00000058	other	emors_8_7	87652	36.6	38.2															MAIPWLIGAAVVGLVGSAIKSSIEEDEAKERQERWEREERSRLHQEEQERIDNARKDEALRVQRQIEKEKKALIHQESMRLMEKYEISDLSSTEFKSYISNIIVNGVSDSTSEIEKILSSSKKMIEVKEEESQLEKQLKELKEIQRYLESI
1	1842	GC_00000059	other	emors_8_7	87652	36.6	38.2											28.804	6.91e-07	WP_117586042	50S ribosome-binding GTPase [Prevotella copri]	MKLDISIMSEKFQHSLSRLDKIIYSDQKPRIAVFGKYNHGKSTLLNAIFGYEAFKSADKRETVENLSIEHDDVMWIDTPGLDADVHGKDDAAALTGAFEMADYLFLVHQVTAGELDKYELDIFNRLAVNTTDYSQKMCLVLTQIDQKTGDELNTIIDKVQQQVSLESQFKEVKIIPISATRYLRGLEENKPIFCEKSGISTLFDEIEKIKNNVIKTREKEKFELINKIAHSLNEMELAINQEMNINKNKQVSLKSDITCELNKLITKVA
1	1850	GC_00000060	other	emors_8_7	87652	36.6	38.2											31.967	1.08e-06	WP_117586042	50S ribosome-binding GTPase [Prevotella copri]	MLTAFAQIKENIITSAPLINKYRDINEVKKELFDIIDNDTLQIMLYGAYNAGKSTLINVLLGEELAVVNDIPTTDKVDEFNWCGYKLLDTPGVNAPIEHEKTTNEQIKRSSVMLFVIREGDQDSKDLYIRLFEMLALGKKVFIVLNHQLTNDDDKAMAYKKIHSIVMSQAPKYGIEDKQIRELVVCPINLKTALNGRLNQHDKLLDHSGYTNFISLFEQWVKMNDAEQERLQHAISAVNTLWYMPIITELKQDGSDESNDAFLNFRQDLAHLQARKKGLILESREMISHNVRLMKAQISQTLTQSTNQIELDTELEALISPLYKKVELWLEESLSHHYSTLSCDVQHTLKQASEDKNNPFFDSMLNQAKTFFSDEKTIKQGLLYGRKFKIPGLKGRWEK…
1	1866	GC_00000062	other	emors_8_7	87652	36.6	38.2											40.996	6.81e-51	AAC46428	unknown [Acinetobacter baylyi ADP1]	MVKNENVFVTSLRDFTGDFVLVNNREDELTKMQFEFESKIKKTLENSNGKLKKESLLFSLTDALKVSVLNGIKEWNEKLIDSLPMKKLSEEYSDRIILLVFGKVNAGKSSFCNFITEQFPNEEIKRFCFVDNRIEYFEQSFAEGVVETTATIQGVEIGRNFVLLDSPGLHSIVDENGDLTRRFTDSADAVLWLTPSSSPGQVQELTDLKLELEKKKPLLPIITRSDQLIEDWSDELNDLVHTIVNKSESIRQLQEVDVIERVKALGNVDDLKSAISISIHAYREHQEKENAQSQAGLNRLFSSLSDIIHEAKEYKVEKANQQLINFINDNVLSTLEKDISPQLLKLKDQTQKTLDDLKKKESLIISELLTTVKSQVRGVVEQHSASQDKVAISSDLNQL…
1	2016	GC_00000086	other	emors_8_7	87652	36.6	38.2											41.736	3.13e-130	RGE45647	hypothetical protein DZC30_07825 [Comamonas testosteroni]	MSEEKSNQEGLLAPKQGVKYSDEVLKNLSDIELHQKLYETWDFHNKKIIVWGRLRRINGVVEYYKVDYIHHALTNEKLEYPYDAKYPMRNGVFISSSAGRSFFKDEEDTYIKAELELSPKRERDKHNNPFELNVVSSSVELLVELPIDITEHKNVLENTSGMVFSNDVEVFISQAVYDRQLSKMTTDFEVIKQRHEDELTSSVDKIKRTIEENEKENTNLVETISENYEKNKLLRLENKQTEKIILEQKETTERYRSEIQELKVQLSKLENDMSQKIERLKHYVVEKAGFLKDFEFIDEDVYFQLTEQKTDQDIDRSNFLSFINDFEADYGKVAAYLQAYLKDQGQYYSRHIVENYLTLLRTNDLIILAGDSGSGKTSLVQSFAKAVGGVAKIIPVKPN…
1	2026	GC_00000088	other	emors_8_7	87652	36.6	38.2	K20993	pyrethroid hydrolase [EC:3.1.1.88]									23.157	4.93e-68	RGE45500	hypothetical protein DZC30_07830 [Comamonas testosteroni]	MSNVPIVLKYIETRWHDKDTLVRLTESQYPLKIELNENGIYEANTTIYPKVSDLNYSQLAINLGKDIENVTPYIIGPNNQKLPMKKIVDPVLEKIWWVETGEWNDEFKAWVTNTRRTAGNIEFQVGTQRLSLHIGFSEASKEDLEKYLTDFKSDMWELILDDNSYIQAEAKEGQVGSVDESTLRFINNILKCGKKLLQQPKSELREVQTLKPRKAVKPVPRTFMEISTRGNCKTLTSRDSEPNYNVAENRYALYVLMATYRIVSQLVQVSKSKSERFSNSLLKLEERLASLKDYKEINRDLVVKDYNRAKKSVDVNVINDKTLVDLNIINGSNILTGNVGYISIQGKNRYNGFFCKIKNQEHEEWGNIRGYSSTAINIPERYKDLLIPYTDYYMQAEID…
1	2120	GC_00000120	other	emors_8_7	87652	36.6	38.2															MNHYNEEYYLLFPDPDVDAYDLNSDSMTNKRKYKKIELDYGQMPLKFSTETYDLSFATSNYEIFFPIGSIVVTEGLKSLLDNGLYGSKFYPAIVKGESEGIREDVWALNIYKLLDCWDRDKSVASYPGGVKSLDGIDVAPSVKTFHLSSEILDNIPEKERLLFVMDNTDVTNIFVHQKFVDIFRKHNIQGTRFIKVSKYRFGMEFV
1	2134	GC_00000127	other	emors_8_7	87652	36.6	38.2															MIDSGLSKHAEKRLFERTFFNEKSINNLIVSKSYFLLGREVNSNVVHCLVYQENTNEYFVVIKNELSNILITILPLEYHAKFESKLIKEYVTIDSEIKRRARLSYSSSLTCDDLKLKIKLKADVVDKYGLRKVCEIKNIKFSLDEYIKYTRDEKKAMNILMRWIKKNKTLEVVGLSLSIGRESEVFNYNV
1	2144	GC_00000132	other	emors_8_7	87652	36.6	38.2	K00986	RNAdirected DNA polymerase [EC:2.7.7.49]									33.083	3.96e-11	WP_117446610	group II intron reverse transcriptase/maturase [Faecalicoccus pleomorphus]	MLMTKLASEENITRAIINAIQERRNNEHAMFQSEMPKSEEACRTLIADLKRELQSKSAYQPSYGYYYALPKSALVDRYVVFLPFKELVLHYCFVQVISDVLDSQLITHCFANRLERKESTGRLTELFAEASWPNYCEWQDKSANESSCMLVTDLSSFFDNIDRHQLLTIIARKMATSVYSPFFSYLDAVLSQPVFLFGKNGEETLIARPRGIMTGPCCSPLLANYYLMDMDSRLNAFEGVEYGRYVDDIRLFGNDKQKIVHVFKVLQAELHALGLSINSSKTKIYNSNVEIVDLIKKEVVLGCDYNGNEETETITEEITLLADELSLDVPFEQRVVEFDYEDGVHDHASAKQFCFFLSEHQVEDWEERDVLLLITIFKCHPSAIKHAAWLMVQAMREGI…
1	2154	GC_00000142	other	emors_8_7	87652	36.6	38.2	K01154	type I restriction enzyme, S subunit [EC:3.1.21.3]									53.676	1.55e-42	WP_117788628	restriction endonuclease subunit S [unclassified Coprobacillus]	MSWPIKPLGELVENCNAKRVPLKQSERDGRTGKYRYYGASGIIDFVDDFLFDGDYLLIGEDGNNLLSRTTPIAFHASGQFWVNNHAHVLKCNGKVDLGFLAYYINSINLEPYITGSAQPKLNKKNLDAIKIPLPPLEEQKRIAAILDKADVIRQKRKQAIELADEFLRSVFLDMFGSDLVRPSDRVSFGDVSILDAKMVDPREEKYLDLLHIGPDRIQKRSGKLLPALTAREEMLISKKFLFDAEYVLYSKIRPYLRKAAIPDFSALCSADMYPVKPVKDKVTREFIWMLLLSDLFDNYVGSLPDRANIPKLNKKELAAFEFSLPNFEKIKKFSDVVKKANYKKSKMEESFRLAVCSFNALSQKAFSGQL
1	2166	GC_00000154	other	emors_8_7	87652	36.6	38.2															VHRIMAITSAFQADDAGSIPAARSISLTSPS
1	111	GC_00000001	flanking	emors_9_1	65503	36.7	38.1											47.917	1.71e-27	RGC81918	PTS fructose-like transporter subunit IIB [Hungatella hathewayi]	MKIVAVTACPTGIAHTYMAADVLKKAAAKLGVSIKVETQGAMGVENVLTPVDIVSADLVIIASDIEIEDKNRFLGINSKQFPIETILTDVEGILKKHLF
1	112	GC_00000001	flanking	emors_9_1	65503	36.7	38.1	K11203	fructoselike PTS system EIIC or EIIBC or EIIABC component									61.27	0	WP_117709256	PTS fructose transporter subunit EIIC [Fusobacterium mortiferum]	MDITSLINANVICLDLKSTSKEDILQEMVQILDDAGKLSNKTQFLADVWAREEIGNTGFEDGIAIPHAKSSAVLTPSVAIGISRTGIDYGAEDGEPSDIFFMLASTDGDDNQHIEALAQVSSRLIEDGFTNKLKKANSKEEILDLFTDIIQPSTESTDIENAPSQIEKSELTRKLGRTKEHLLFGTSHMIPFIVAGGVLLSLSVMISGQGAVPTEGILADIAQMGIAGLTLFTAVLGGYIAYSIADKPGLAPGMIGSWIAVQQYNTGFLGAIIIGFFAGFVVRSLKKIKLPESMASLGSIFIYPLVGTFLTCAAVMWVIGAPISNAMAALNEWLASMAGSGKIALGAILGAMAAFDMGGPINKVATLFAQTQVNTQPWLMGGVGIAICTPPLGMALATF…
1	193	GC_00000002	flanking	emors_9_1	65503	36.7	38.1	K07001	NTE family protein									30.654	1.26e-100	WP_119143698	patatin-like phospholipase family protein [Pseudomonas reidholzensis]	MRHVFRLNLWFVFLATFLFMPYLYAEPIKEPSHPKIALVLAGGGAKGAAHIGVLKALEELNIPIDIITGTSMGAYVGGLYATGKSASEIEGYLHTVDWYSGYQDEVGREEKNIRDKKYEDRFAINPSLGIRKEGIKSPKSAIQGQNMLKILRETSGNPVSVASFDDFPIRYRSVATDIVSMEEVVIDHGLLVDAMMASMSVPGALPPYEFEDKLLIDGGVTNNMPVELAKEMGADIVIAVDISSNYMTKEQIGSLFDVASQLTNFMVKRSTQEQAEFLTDKDILLQPRVGDIETTDFSSMPRAYQEGYYTVMTLKSRLQSLAVTPNEYAQYRNRIKQQSANVRLAQSTIIDKVEVENRSHYESDKLERFIQFEQGTLLSSDYIEDKIHALYATNRFETI…
1	262	GC_00000003	flanking	emors_9_1	65503	36.7	38.1											31.068	2.99e-09	WP_116986099	phosphoenolpyruvate--protein phosphotransferase, partial [Escherichia coli]	MELNTIDYRITFFVKDQGLPPQVASQLTRLAKKFKSLVYIDNITQNRSTNAESSLGLLQVGLCPGDFCQLITVGMDAEWANFVLTDLLSSTFDFVASDKLCDFSETITNTYPQLTPQCEVDFHYVKAQAVLSKFEILKGLSQLIYPKESDELLLALIKREERSSTAMAKQIALPHVISPYVEKPTIAIIRSDYPVDWASKMGDVNVIIALVLPEKPTKEMIMAATYLTRSLLSENFSQRLVHTRQPKGLQALILYAMCQLL
1	330	GC_00000004	flanking	emors_9_1	65503	36.7	38.1	K01809	mannose6phosphate isomerase [EC:5.3.1.8]	M00114	Pathway modules; Carbohydrate metabolism; Other carbohydrate metabolism	M00114	Ascorbate biosynthesis, plants, fructose6P > ascorbate					62.404	2.24e-174	WP_005478337	mannose-6-phosphate isomerase, class I [Vibrio parahaemolyticus]	MNALKPQTFYPMTNVIQDYAWGSHTSIEALFDIKNNTGKPQAELWMGAHPNGCSAVTVNGDSVLLSDLINQDKEAFLSKTTADAFGELPYLFKVLAAEKALSIQVHPNKQQAVDGFEKEEKTGIALTAFNRNYKDNNHKPELVYALTDYKAMNGFRDYQEIVSLFSAMQLPTIASYVDDLAQEPNSNGLQRFFKAILSLENETKERAVAELLDYASSSTDELFVLLQDLAIQYPNDVGLFAPLMLNVITLKPGEAMFLSACTPHAYIHGTGLEIMANSDNVLRAGLTPKYMDIDELMSCTEFVSQPLSSLLTQPNTVDGGMSYPIPVNDFKFSVFTATDALTLETNSAEILFAIDSDLTLTHENGESVTVAKGHSVFVPAYAKRYSLTSNGNVARAYN
1	396	GC_00000005	conserved_T6SS	emors_9_1	65503	36.7	38.1											50	4.51e-11	P96156	Chitodextrinase; AltName: Full=Endo-chitodextinase; Flags: Precursor	MIKLNKITAAITSVMFSGYLYAADASATSNVVTFVPGETKVQNGDIVSFNGDCFVAKNNPGVWESPTADSWFWDVAECSGEPNPGPGPNPGPNPGPDPDLGDIIPFIPGKTQVENGDVVSYENQCFIAQNNPGVWETPSASSWFWTLTECSDEPINPEPEVTELSILAPTAGQVLTANEAISINAHVDGNLAAKVEFWANNSKLAEKTVNQNNTQYSQTWTPSEEGNATINVFVFDKNNQKIEQKSVSVTVKAEVTEDFVAPVVKFVTPANGSTMNVAESLSISVNATDADNDLATLVVKANNKEICSFDAANTNTFACNWQPTQAGNITLNAIATDAQDLSSTATVRITVEEDVVEPPVEPPVTPGDLCKDFNVYPDWTRGDHATGGDIMVHDNIAYS…
1	441	GC_00000006	conserved_T6SS	emors_9_1	65503	36.7	38.1	K11892	type VI secretion system protein ImpK									24.8	1.8e-08	WP_010910863	type VI secretion system protein TssL, long form [Mesorhizobium japonicum]	MSYVEDDVTVVLFQPEPGKPMEVMPAPDLSRNISVSELDISSMGINPLVDQFSWLIASLSCMSSIPWLDDPMPFREQVAREIRKGERMLNEMEVDRASILVIRYCLCAAMDESVCRQEWGANSNWSQNSLLSEFHNETSGGDKFFVILDRLKADPRKYRHVIEFLYLLLQLGFKGKYGRAERGAESLTEIGNTIYRLVRDERLAEQEKVALVDVKSKYLKKPLKRVLPPKLILGVSALLFAAMYAATYLVIDVRFQKLLSLYQ
1	480	GC_00000007	conserved_T6SS	emors_9_1	65503	36.7	38.1	K20276	large repetitive protein									41.849	2.73e-99	WP_011105819	hypothetical protein [Vibrio parahaemolyticus]	MTIFIVIFTIYMVYVSRCHLFTNKYNACSLITTTRFYIFMRIFSFLKQCAGLGLILLISSCGGESKDTSPPKRETTSVSGILFDAPIAGARVVLWEYANGAIGKKLGETRTSSKGDYSMEVNSGSMPVLLQAFGGAYTDPATGEVVYEGDGKTLKFESTAYFYENKANRIMLTPLSLISKGLADYKIHKLGMDAKGAIDSANSTISNMYGFDVITVEPIDIVKGGQSAYVTAGHQYGAYLTAYSVFSSDLIKKYPASDSSSIYTSFTLSDIMYRDISADGQLDGYETDNISGLDKKISFGKESVSVETYTNILSQYILITVNNNRLNVSGTNPNDYKPFASKVNKLGTTPETMTVFPPRTEVPIDDTEPTVERSDKDVLVRLDSLDLLVKDNVGTKSLR…
1	519	GC_00000008	conserved_T6SS	emors_9_1	65503	36.7	38.1	K11906	type VI secretion system protein VasD									26.984	4.76e-15	WP_010910850	type VI secretion system lipoprotein TssJ [Mesorhizobium]	MRKLLTFSLIFLLSGCTMWDQFKESTGITPETSSIELIITADKVLNVREGGQSSPVILRIHELNSPVLFRNLDFFALFENDKDALGDEYIKRYEYQIQPGDVVHETLVLDPATRAIGFSVAFRDINGSSWRKVELIEEKSEYFLKLNLKESELSSNNTRGIEQIYF
1	557	GC_00000009	conserved_T6SS	emors_9_1	65503	36.7	38.1	K11893	type VI secretion system protein ImpJ									33.333	2.23e-84	WP_005463797	type VI secretion system baseplate subunit TssK [Vibrio parahaemolyticus]	MSLYNPVVWQDGMFMKPQHFQQLDRFQGKQSGMLSGFESPLHWGIKRIEINTELLALGKIGITHAEGILQDRTPFDLPLHASLPEVKDVDASVANKVLYLCCPLPSERSELFGTSKDGARYSIHTQDAVDACYDSEEIANITIGKLNFCLMYEDEDKSAYTSIPILKISEVKPDGSIILDNAYIPTCIDINASTVLKKFTTEFASMLRHRAESIVQRLGVVDQQGVSSVSDFMLLQALNRYEPLFWHFANIEGVHPEAFYRVLLQAEGELATLCSSSRRPQEFVAYNHGNLTSCLSTILHNSKVTLSVMSEQRAIPLPLKEQGYGIRIAPISDRSIVESTTFILAVKADVTLDILHTQFVSQTKIGSIDNIRELINLQLPGINIKPMPVVPRALPYHAG…
1	595	GC_00000010	conserved_T6SS	emors_9_1	65503	36.7	38.1											66.5	6.66e-98	WP_011105828	hypothetical protein [Vibrio parahaemolyticus]	MAKPIQLGFMALIMACSLPAFAKGERYGIAANFKTIESTEYEQGMSGELSTISYGLVHTRPIDENNNRWRWLFGFNYLSDYIEAPANGVYQEVTNYEFRIVPQYALGNWWAFTPYVGAGLSLGYSQYGNRWKVDDEGYKYGNQLEDIDQFEVGAVLSFGTVIKLGSNPDAHLQIIPQASYIQPIYNDGLGGLELSVSLLF
1	633	GC_00000011	conserved_T6SS	emors_9_1	65503	36.7	38.1											39.13	0.000434	WP_117539334	FHA domain-containing protein [Coprococcus catus]	MHLNQLTLFITKSPEEYTGSKHIEMPESGGSLGRNPSNTVSLVDHNRFISGSHCLISIYGDTYYLSDVSTNGTLVNGNKLLKNQPISLYDGDTIVLGRYEISVGLEKLSNSVNIAADISEETDSTDPLVNLAEYTPDEEKDKGNIADLFKETRIDKVDSSDPVAHLNFITQTNNDDHLLHGNEKKQEQKIKEPIHTRQLLDDSDSVHSEFDVPNLIPEDWFSNDFTDTSIPPVQVNEPIATHSEPESMMHSFIDSTPETIISSASEISSVTEQLAWEDVTQTIQPSVSTTEPKSDEFFIAPSTSMDVYPSQSIETSFNSKMSDDAASAFYKGLGMSASQIEQTDEQFFQQMGNCLRLCINNLQKELSELKAIKNNEQDDSMTNIVELMLSLNHQQLLSP…
1	670	GC_00000012	conserved_T6SS	emors_9_1	65503	36.7	38.1											30.882	1.68e-20	WP_116949140	Lrp/AsnC family transcriptional regulator [Jiangella endophytica]	MSNMNLQGLDKLDRRIISNLLSNGRESIANLSRNVGLSRTAVAERINRLEKTGIIKGYTAQIRMGNKDENASSYLLISCNKGQKDSVSDGLKEIPEVKMTSIVGGTYDIICLIEAPDLHRIHYLCSEIESLSGIKEVKNTIVLHQPVCR
1	706	GC_00000013	conserved_T6SS	emors_9_1	65503	36.7	38.1	K11901	type VI secretion system protein ImpB									40	2.67e-32	WP_117580760	type VI secretion system contractile sheath small subunit [Enterobacter]	MSRDGSVAPKERINIRYVPATGDVQEDVELPLSMMVVGDFTARTDETPIEDRTPINIDKDNFNDVMEGYSPNVKVNVDNKLSDEEGAQLGVDLTFNSMKDFSPEAIAKSVPELNGLLELREALVALKGPLGNVPAFRKKIAAVLQDEEARQKLLEELNIGSAKEEAKAE
1	742	GC_00000014	conserved_T6SS	emors_9_1	65503	36.7	38.1	K11905	type VI secretion system protein													MEKGYRLLERIELGEPKNCYEKVVSHKHLIESIHLHLADLLNTHAGNAMIDNDYGLPDFNDVLSNNTNLVRNIQQNIKVSIEKFEPRMRNVEVHYRHDNNNPLQLGFGIGGEVIHNGGKVPMAINIFMGVDGQFNV
1	778	GC_00000015	conserved_T6SS	emors_9_1	65503	36.7	38.1	K11900	type VI secretion system protein ImpC									60.288	0	WP_117611541	type VI secretion system contractile sheath large subunit [Escherichia coli]	MTAEAQAPEQEAALVESGSLLDSILNETRLKPSDEGFDVAKRGVEAFIGELLSTNTSDKVDQSLVDLMISEIDQKLSKQVDAILHNEEVQAIESTWRGLKYLVDHTDFRENIQIELISAKKDEVLDDFEDAPEVVKSGLYKQIYTREYGQFGGKPVGAVICDFQMSASSPDIKLMEYMANVGAMSHAPFITSASAKFFGLDSYEELPNLKDLKSVFEGPQYTKWRGFREHEDARYVGLCTSRMMLRTPYSVEDNPIKAFDYNEHVKDGHDNYLWGNSAYAMASKISESFAKYRWCPNIIGPQSGGTVSDLPVYNYESMGQIETKIPTEILISDRREYELAEEGFIALTMRKGSDNAAFFSANSVQKAKVFPNTPEGQQAEMNYKLGIQLPYMFIINRLA…
1	814	GC_00000016	conserved_T6SS	emors_9_1	65503	36.7	38.1	K11903	type VI secretion system secreted protein Hcp									52.326	6.63e-65	WP_137712216	Hcp family type VI secretion system effector [Brenneria rubrifaciens]	MPTPAYMSIKGETQGDITKDAYSADSVGNVWQEAHVDEFLVQELDHVLTVPRDPQSGQPTGQRVHRPVVVTKQQDRCSPLLFNSLVSGEKLPECNIKFYRTSTSGKQEHYYTIKLIDALLVDMQTRMAHCQDAAMSDRVTEEVLKFTYRAIEVTHETCGTAGNDDWRTPREA
1	850	GC_00000017	conserved_T6SS	emors_9_1	65503	36.7	38.1											45.455	5.59e-08	WP_117031792	DUF2169 domain-containing protein, partial [Klebsiella pneumoniae]	MQLWDIDSESPFTLKGRFQRDSEGHEVWVLSMKRAWTFLDGSWSEEVDNLELNDDPIYLGEPGFSAMVADHDFPIYKKNTDVLIYGKARSYAKKPVHSQLCRVLIDEHIDKTLKVVGERHWVDHSGSITVSTTQSFIERDIDYSNAIGGDERNRIGGGAAETNVELLKAKVPSIFYPDQNWQASSKKVKVAGFGPMPPFFHDRAKWAGTFDEKWFEERRPVWPIDFDDRFYQSAPQDQQCNGYLQGGERLMVSGFCHNDALSFRIPSEKFKAVAVFNGKEEKINMPMYTLWIDTENKRIEATYTAAFPCQNREHLLTSSYLVELP
1	886	GC_00000018	conserved_T6SS	emors_9_1	65503	36.7	38.1	K11895	type VI secretion system protein ImpH									32.827	7.65e-55	WP_000348794	type VI secretion system baseplate subunit TssG [Escherichia coli]	MIQYIVNKPCDYSFFQAVSLLEKHYQNLSGIEYKAIGENQYVKNEYIQFSVSPKLSFPKSDIEFITEFERNDATYTQIEVNFMGLHGVSSPLPASYTEKLAGRDPDDNPVKEFFDFFHHRYISMLYRVWKKYRYHIQYKSDAKDPFSGRLLHLVGLSSVIQESNDVDLDRAKLLSYVNQLSTRTRSPKLVSGIVSHYFSLSNVYIEEWVYRRITIAVSQRNCLNRKNCQLGGDFHLGQSMADLTGKFNLCIDDIDFDTYVKFLPGGALHETLIGLMKFILCDPMAWDLKLTVRNKSLPINQLGDGLGNELGQTFWLGTTKGEETKIKIVGSN
1	922	GC_00000019	conserved_T6SS	emors_9_1	65503	36.7	38.1	K11914	sigma54 dependent transcriptional regulator									42.462	3.92e-78	WP_126397535	sigma 54-interacting transcriptional regulator [Blastochloris tepida]	MSLAKSDNLNNALLAISQSLADRSQLALTLDAILAAARQLTFADHGIIYVLDQTGQALLPSVVHHNEHILAEHPWQPLTLESIDETDPFSFAIQNGEVVLINDLYQYNGYQCDEIYQNESILNCQSKNLLAWPLIDNEKNTVGLLVLFDLNVINDEASLTCFCQMAATNIRQAVWLEKYGYMIKELSEDNASLTRENNQLKQRKQSQYSGPIAESEVMLNALARLDKVLSLPVDVLIRGETGVGKEVIAKYIHENSNRSKQALIVQNCAAIPEQLLESELFGHKKGAFTGADKDKIGLFEAADGGTLFLDEIGDMPLLLQAKLLRVLQERKFRPIGGNKEISVDVRVLAATHANLMEKIKKNEFRADLFYRLNVFPITIPPLRERTEDIIPLSEHFIKL…
1	958	GC_00000020	conserved_T6SS	emors_9_1	65503	36.7	38.1															MKPYLLLLPAALVVAGCSNQTSVPDPLAPYKNVHIIGNKKQSIGSFNYLSKDVDGYTDKQVIVYFNEIPFTSTFNLCADKGVYIANCKSTVSIFPSKNKGVIFNYDLNFYNGSYPARVGSMNILLPSTTTRKMDNLTQYTSAKFSEEQFLESETLEEATFILMKSS
1	994	GC_00000021	conserved_T6SS	emors_9_1	65503	36.7	38.1	K11891	type VI secretion system protein ImpL									22.886	8.71e-69	AFJ27267	IcmF-like protein [Escherichia coli Xuzhou21]	MIKNTLARTPFILSTVISAFFALLLVGVYYLWFNQADLRLLWGMLGIIFSIYAIFNLTLYIKKRKNKSHQNIETEEDTLSMVLKPLLHKAGKKPVYLVLGNKGSGKNQFLNVSNAIKPMDKVKNVKNDFFEWSESDSAVYIKPNHRLTFQEISSNDSLLWDALINEVIKHKPRKPFAGCMLLIDFEFLIVHDDEQTDYTLNALLQRLESIKETTGATLPLYLIMTKLDKLEGFKEYIHFSPLKSSVEFLAIPLKDAKGAILDYFHDSYKNIVKVMESNALDSSSYTNNPDEKQTILAFPKQFELCEKEISRIIERLNELNQGTYSIDIREVFFSSSLQGGRKYNLLAKSCSNYFNLPIIASEHGQLTETPYFTRFLVDAKVLPESDYSAENQHYLKRIQ…
1	1030	GC_00000022	conserved_T6SS	emors_9_1	65503	36.7	38.1	K11896	type VI secretion system protein ImpG									32.241	2.73e-90	WP_117681754	type VI secretion system baseplate subunit TssF [Klebsiella pneumoniae]	MSNSKYFQDELTYLKEAGSEFAKYHPKLTHFLSEGTFDPDVERLLEGFAFLTGRVREKIDDELPELTQSLISLLWPHYMRSVPSMCISELVPHSGSVTEKIIVERGAEMASEQVEGTQCQFRTCYDVALYPLSIQQIEQNNSRTNSSLHLTIAANNGLELSRIKLDTLRFHLHGEQHITRSLYLWLFRYLEYVELDVGGGYKHRLRADQVIPVGFGDDEGILPYSKNSFSGYRLLQEYFSLPDKFMFFDLKGLEWLGGIPQRSTVKISFAFSRALPSEVIVKNKHFKLHCTPSVNLFEKDGDPIRLDHQLNEYKVRPQSSNQEHYEVYSVESVESWSKAERCRKKLIEFESFEHQINQRDKRDFYKTKVSERINGRGLERYISFHSHNNQVSELGSETV…
1	1066	GC_00000023	conserved_T6SS	emors_9_1	65503	36.7	38.1	K11910	type VI secretion system protein VasJ									24.063	2.02e-25	WP_119144555	type VI secretion system protein TssA [Pseudomonas reidholzensis]	MASLNFESLLKPISEVAPTGEESKYEFCYELMELEIKKFGSLFGETVDWKVVETNAIEVLTTYSKDLKAICYLIRALIERNGFIGLDEGLNLLKQSLVLFGTDLFPQRKRARDGAMEWFVAQLETTLPKLDTSTTNWESVASYLQRINEISDQYHEAFSDSDVEFYLITSVLNGISQRVVGVSETNTNTSVKMTSEPEPLVEETTSAVTEVKTLSQVATKVPKTVNTVKQEVDIDTDFSSPSASKRTLKKVAEFMLHSDISTPLAYRLHRNCTWCEVDELPPHDNDKKTPLSLAVSQDQLSEYRDKAKQETESEVIKRLERTLTDAPFWLTGHYLMFQMLTNLDHHEAAEAVKQETQYFISQLEGIELLTFANSTPFADEETLKWLSSNTTTTPVAVAA…
1	1102	GC_00000024	conserved_T6SS	emors_9_1	65503	36.7	38.1	K11907	type VI secretion system protein VasG									45.614	0	WP_117580830	type VI secretion system ATPase TssH [Enterobacter]	MININLSSLIQRLHPITKVALEDAAALAVSERASEVQIEHFLLSLLERPNSDFDQLLAHFECSENLLRQAIKSTLENSHKSNGGKPVFSAMLIEWLQEGWLVSSLDLSETQIRSGALLLTLISNPLRYGQHGYSSLLENINPETLKRNFAELTSRSIESQVATSEQTHAREDGSALSKFTTDFTGKARKGEIDPVFCRDQEIRQIIDILARRRKNNPIAVGEPGVGKTAVVEGLALKIVQGEVPDCLKGVELYGLDMGLLQAGASVKGEFEKRLNAVLDEVKNSPTPIILFIDEAHTLVGGGNQAGGSDAANLLKPALARGEVKTIAATTWSEYKKYFEKDPALARRFQLVKLDEPSTEQAALIIRGLRTVYEKSHNVYVRDDAITAAATLSDRYISGR…
1	1138	GC_00000025	conserved_T6SS	emors_9_1	65503	36.7	38.1	K11904	type VI secretion system secreted protein VgrG									37.455	1.22e-117	WP_002213876	type VI secretion system tip protein VgrG [Yersinia pestis]	MVSDIEFKFEVLGTEHEFRVESFNVVEELSKPFHVSLSLLSLDADITFDELIRKPALLSIFGQGVGTARQFHGVVNEVRYLGEGRRFSRYQITLVPQLWFLTQRQDCRIFQEKSVVDIVTEVLDGAAVTDYRFDISALYPTKEYVLQYRESDSHFVQRLLAEHGLWYYFEHTTANHTMVIVDKNDAIAELENTPLNSSYVGPVIYQADGGGNADREHIFDLESINRVRTGHVTHTDYNYEQPRIPQKMESSGLIDTDLAFFDYPGRYIEPSQGLVRADELMAESVVDNYQIEAASNVMRLIPGYSFILDKHPRRALNRDYTILTVTHSGYDPQVHEDEANEMPTTYQNQFSCLPRDIEFKAPKIAAPVVDGPQTAVVVGPAGEEIYTDKLGRIKVQFHW…
1	1174	GC_00000026	conserved_T6SS	emors_9_1	65503	36.7	38.1															MVRLQLTNSIEVAGAIDENSQAESLACVPRFGKVISLHPTMPDRIYVEFDGLATGSTALAKIGRLFRKSELEFAIESGLTCRIEFLNGDITLPVLTDIFFSLLDDDQPVILRAKSLIIEAENELIVRSGATQTKYSGRDGRVTTQAKYITSQAEKAQKIQGSTIAVN
1	1210	GC_00000027	conserved_T6SS	emors_9_1	65503	36.7	38.1	K11911	type VI secretion system protein VasL									44.598	1.38e-123	WP_011105827	type VI secretion system ImpA family N-terminal domain-containing protein [Vibrio parahaemolyticus]	MLGLKFNMNLSDFARRPISKETPSGINPNSLDNFSEIKREVNKLNTVTSKISWKNVFKLSRNILETESKDIRCACYYTVSATHIDGLKGLVNGLNALLDICVIYWHSGYPDVNKTTARMGAFEWLTEHAIKKQKTLKISPTDLVLIETGHKLTLKIEEELRSHYGNKSPSLGAIRRIFSQWIEEIQTTKLSLEEQRLKKEAIEKQNNSGINVNVSLPPRDESKKTVQPTMTHTEKDKNIKPMVTISLAFIFILTLLFGHFLYADNQKSTLLINIQKADLTTINPLISQLENKEDDLKQYVKTALIKQALHLNKDWEVTSTKVDKIDELETLNHSLKNLYPDSAAVKKLEYEFNQQRADFENEYSDIHRRFLKSRTIFANAKNHNSDENIVKAYSYSNSL…
1	1246	GC_00000028	conserved_T6SS	emors_9_1	65503	36.7	38.1															MSIYQHQYILDSDIVVPTGMNTELAIAIARADIDRFATFEDSNEKYTVASLEFVDQTCLMTKVQETLNVLITPLLDRLHISLKPLPLLLSVPQEISEHDLRNWIDESDFSDYLSNIKFSKNSGNAFLQECLNSLAEPDAIMCIAIDSLYEKKEALMSSRDAMSGTNPWGVLPSEGGAGMVLTKRNVLDTLKLIPQSKIVYSQFDWHSSDRRGCARLIRAASKHHDNLGPIYSDMTNQRAHTEDYGFAIGARSEVLPYAQQVTLTNEFWGTIGGGSGIATLATMNHLSTVGVLSTAFLFDQNNTRSLFILNREK
1	1282	GC_00000029	conserved_T6SS	emors_9_1	65503	36.7	38.1											30.526	1.93e-17	WP_138184353	serine/threonine protein kinase [Paenibacillus alvei]	MSELQGSTNDFINQLVVKAIEKKKKNEQTLANKLKPRLEHVLFSQFDVLETIESHNQKTTLYRLAKKDEPEKQICCKVLNSEQPEHVQEMFVAEATHLEVAQHPSIIDFIKLGNEFERPYFMYKWAEGESVAEKLTRHKYKSFRHDHIAWLIYQLAGALEYIHTKGICHLDIKPSNIIICEDDSIKLIDFGAAQYINDSRKYNEASLSYASPKYIESGKAVPQDDVYSMALLVCALFTGYSDNNDWKALLQQRKRPHTIPKTVWNLLRLVVTKPRTHGLTPISFAQALAHIDMNVMQGSHNAPLFTQLRNADLVLRKSSKYDVFRLGRFKYLEASLAACLCLITFTVLLKSFAFTVADNNAVSLSDTSSRIKPAQAATFLSQPPWEIENALDNNSSDVV…
1	1318	GC_00000030	conserved_T6SS	emors_9_1	65503	36.7	38.1															MNRYRYLVDDVKKTLTDADKQQAIADIALAQEQLSSFSENMVNFLYTKAILAAETASFYIKQQYRFHQNGYPAKEIDYLTLLETQLSEIEKVFIALLRIHRGFVYVVYSEYPEVLAWLCLSKNIESQHDNDELTLLGISIIDQLDPELAMPLILRSNSNHIHKLLARFIEGGASKRELYYRCLVINQSVSVSLIKHWLEDKKLPEKMLHSYLALMNVGSSIEWLQELTNVDDLLFENLILKEDRATWFRQQYSVDTISSETANTYSKLLTLKEFSLFDIEKEQAVIHFILSGDTELVPLIIEHLMQLDEVDAQLWCEGLFLVYGEEFPFLPSKLGNTIEWQDALHEIVEWQEQIEVVKSVPLRMGQKLTFDSSIRAMKSSELSSSLREWLWRELCIMSR…
1	1354	GC_00000031	conserved_T6SS	emors_9_1	65503	36.7	38.1	K19304	murein DDendopeptidase [EC:3.4.24.]									33.621	1.83e-40	WP_116986330	murein DD-endopeptidase MepM, partial [Escherichia coli]	MKLKYLTFISINLAFIILSISLLYFSSNHSDVTNVSQISTSPQKNVSDNEKQKSDNLVINGTINDSFFSSALNAGLTSKQIFSFTEALHNSVNFIDGIEDGTPYSIVLDKNTSHIRSFFYTESNRLHTIQLGKNGLYYNELGVNLSSNKLILPTGNLFRISSHFSKKRKHPVVGIVQAHVGTDYATPIGTPVMSVSKGIVSRSEYHPLAGNFISIKHNNGITTRYLHLNDRYVNKGDHVYKGEIIGKTGNSGRTTGPHLHFEYIVNNIPQDFTKLHNNIEMPLNNKNQKKLLKCINLSKTLITKILKEG
1	1389	GC_00000032	other	emors_9_1	65503	36.7	38.1															MKKILLLALFSITLMGCNDPESAAAEAAQLRAEQHPERTYVGEHNYYTMESSGDIQFTTKKDLKVMYQDFPRYFIEKAKEWPKEDLNDASSYDLPRFQFAWANSSSEDEYESGLKIWSMKTDGTDLRLVTDATIGFASIRNLARSPNNRYVAWAGSGGQKGVYDLKTGKVSNMHKFTSPLDMLWSEDSRYLYFDDAINSYARWDSETGEVSDSDLKVRTEAVLTEDKIIKVTDAAVVGYNLKTNERLFVLSSDRSLSDKERIFRVKSISPTGRFAWGSNQSFAWMFDTKELTVKQMTTDYTPAQILGKDAHFSALDSFAKVRIVDRVGDRVWSWRAFYYGALSGDAILYNGLVNNGLWFKEGK
1	1390	GC_00000032	other	emors_9_1	65503	36.7	38.1															MSTLKKILLLALFSITLMGCNDPESAAAEAAQLRAEQHPERTYVGEHNYYIMESSEHAAFGRKKELKVMYQDFPRYFVEKAKEWPKEDLNDASSYDLPRFQFAWANSSSEDEYESGLKIWSMKTDGTDLRLVTDATIDLTEVRNLTRSPNNRYVAWAGSGGHKSVYDLKTGKVTVVQKTTSPLDMLWSEDSRYLYHERYRNRYSRWDSETGEISEIDFDIETSAISYGGNRIVVYPFGVTVFDSITNEKKLLIDVDETLPFKEARMTIRSIDPTGRYAWGSNPSFGFFFDIEKGTVKQMVDDFVPAQILGKDAHYSALSKMTYVTIVDRVEDKVWSWRAFSHGAMSGEGILYNGLANDGLWFKGSK
1	1423	GC_00000033	other	emors_9_1	65503	36.7	38.1							EFF01293	41.594	5.43e-155	NA					MHFNCKLIPSSSLSHKELEYILTPDEYVRLLSREKNSQNIINQLPVQLRQSLSISASKSVQSLLFSLNQKLTKAEWIAVSTTVRKTGLSDTQLAQYPQLKKQIDRVETTQPAKFVKANFKPVTDDVPLVRNLSFTPVEPSPEHKISIEFAGQWPNNAASLLLAKSGEQKEKIVKPRADIHASHRSIATFKDLEPEPRNLYLTIPMNGTPQPLKLLLAENIQPVEKETEMDEWDTVLVPVVPMKKLGEEYSLHQIGYFYVIWNGKVWREITIDSNGYFCDLDIQHERQEPLPTRHVNINASEFFPEANMSFEKFELYQEGQKVFSGELDVCEQSRVFNLVAEEVELKFVDFEHDEILLTTFESPIKNNASNERQAMSYPMPHVWLPYKLLGEVQADCYMY…
1	1456	GC_00000034	other	emors_9_1	65503	36.7	38.1											32.11	2.19e-06	WP_005483532	OmpA family protein [Vibrio]	MSALKTYDHGVYLLGTFFEWKRRGQSESFPDWNKGLSSDATETDLRNVRPIPFTPVLVDDAEKPVLWGTNKDGLLCQLGYFDENTAPESIAKKQTFLRHKQPLTVSELNLDKPYSLMFPPLNVIGQLAETHTSVKALNDSLKDIYSNKLKVEEKYSKLIEFAISKIKVSQLADPYKKEPDKPLTDEQNDYNDWYDKIIASEVKEIRGIIAPVYHSLGVVFSSDLYVGAEVSLIQVKSKQDNSGEVEDVLATSFITKPNPNQEKTDEAKATLPSVVFNFNPALIDDGYFLLRTRFWVKDYLDKQKEILEEGIDTIFPDSVKQGQLKFEAKVKHPESGRIQDVYTYELHEKVTFKPISGFGKLAMVCGDLISLEECLMYQYPTALPSYSDFMIQQGNPVAL…
1	1487	GC_00000035	other	emors_9_1	65503	36.7	38.1															MAIQFTSIVESGRFKDRKFARLVLNTIILIIVLMVMTLEILDDYDILDLFNDIQDNIIAFTTLCYMSALYSYGYQLPLFKHQWQVFLILYLTLAQAVYVLGYLTYTQYDQHSIIYLLSYCLFWSLFYGYLIYTINNLKNDIK
1	1516	GC_00000036	other	emors_9_1	65503	36.7	38.1															MNSQYYIFSKTKLEYFPFQQTPKPIVPVEPDLLLEMTFSPKLFIINDIAEKVENLVQHGVEWLDARVDCSPSQPTDEQIKVFENFRMPYIHQTYRLTNEEKQYGKLNWLDLNSVDLDFSRLNNIPLEERLIFKLEEDFGYVFIHESVIELLKKHVKDVWVRDV
1	1593	GC_00000039	other	emors_9_1	65503	36.7	38.1							EFF01536	48.338	2.46e-107	Toxin PAAR-like domain	45.361	1.17e-18	WP_119719572	hypothetical protein [Klebsiella pneumoniae]	MGVTVAANGLSVVHQGSGGEANATLPDVCLTKVGKPIVPIPYGNNAKSADLAKGTTTITMDGGNPVAIKGSTFSKSTGDAGGDKKGVASGTIEAEAEFISASPTVKFEGKGVCRLSDQMTMNKANTMCLGGAQNPSVSLTLEEEGTYTVDLFLSYSDGDPVQGATYKLVDQTGTIFEGNLDTKGKASISGIAPGEFDIEYGEDSREFTPNIPTKENPNYNPNASAQMLIDETKRGEIGFWESSWRKTAGAASWIWGVILGDFNDDATVEQIIANTAITMLPVVDQAADVRDMVANTMTLLNEEERDKPENWLALSLTLIGCIPVFGSAVKGTCKVALKSGKATSKDDLLAIMRAMGKGDPEKFLRTLDWADYAKQTSQIISDVLQPCIEVATELASYAN…
1	1780	GC_00000052	other	emors_9_1	65503	36.7	38.1															MKVAYINEKLITSNAMFIASDNRDFLYSDMDFNPTSTQYPIIWEDKSMTSFGVFDITNSGDLSVTAPIAEVFMSFDPYGVEFYPNRLNCADGMSDQIRYIIAIHNEVDVVDIDKSHIEKMVIKYNPEKHGYDIPDEDKKDVIMYRTSRLFLSEEKIQNLPENKKHIFRVKDTEAFFFSEEVYNALYNIAVDGKASGLTAYTFDTNEKAPKF
1	1969	GC_00000077	other	emors_9_1	65503	36.7	38.1															MSIVKKARPSLQDGKKIEKHFLTTKISCPITSHHLISFNLFDKVSSRRKKQINDHKYNRDAHENLILIPSKDKILAKRVACYYGLPWHSSGHTGKNIISHWSNTEPERLERKTANLETEKNADPFAPSNMQSKGNALTKEELQMYNKDIKKLKKTSGYHKVVASLFFTVLKKLKCSQTNVEYQGHLERLSLDICEYISYFELLLSNPGYDFSPNQVGCQEEHCNGRTHETENKAWPSKEDVNFELKIDQRLKLVSEI
1	5	GC_00000001	flanking	ES401	71456	36.7	38.3											47.917	1.71e-27	RGC81918	PTS fructose-like transporter subunit IIB [Hungatella hathewayi]	MKIVAVTACPTGIAHTYMAADVLKKAAAKLGVSIKVETQGAMGVENVLTPVDIVSADLVIIASDIEIEDKNRFLGINSKQFPIETILTDVEGILKKHLF
1	6	GC_00000001	flanking	ES401	71456	36.7	38.3	K11203	fructoselike PTS system EIIC or EIIBC or EIIABC component									61.453	0	WP_117709256	PTS fructose transporter subunit EIIC [Fusobacterium mortiferum]	MDITSLINANVICLDLKSTSKEDILQEMVQILDDAGKLSNKTQFLSDVWAREEIGNTGFEDGIAIPHAKSSAVLTPSVAIGISRTGIDYGAEDGEPSDIFFMLASTDGDDNQHIEALAQISSRLIEDGFTNKLKKANSKEEILDLFTDIIQPNTESTYIENTPPQTEKSELTRKLGRTKEHLLFGTSHMIPFIVAGGVLLSLSVMISGQGAVPTEGILADIAQMGIAGLTLFTAVLGGYIAYSIADKPGLAPGMIGSWIAVQQYNTGFLGAIIIGFFAGFVVRSLKKIKLPESMASLGSIFIYPLVGTFLTCAAVMWVIGAPISNAMAALNEWLASMAGSGKIALGAILGAMAAFDMGGPINKVATLFAQTQVNTQPWLMGGVGIAICTPPLGMALATF…
1	139	GC_00000002	flanking	ES401	71456	36.7	38.3	K07001	NTE family protein									30.654	7.09e-99	WP_119143698	patatin-like phospholipase family protein [Pseudomonas reidholzensis]	MHHVFRLKLWFVFLATFLFMPYLYAEPIKEPSHLKIALVLAGGGAKGAAHIGVLKALEELNIPIDIITGTSMGAYVGGLYATGKSASEIEAYLHTVDWYSGYQDEVGREEKNIRDKKYEDRFAINPSLGIRKEGVKSPKSAIQGQNMLKILRETSGNPVSVTSFDDFPIRYRSVATDIVSMEEVVIDHGLLVDAMMASMSVPGALPPYEFEDRLLIDGGVTNNMPVELAKEMGADIVIAVDISSNYMTKEQIGSLFDVASQLTNFMVKRSTQEQAEFLTDKDILLQPRVGDIETTDFSSMPRAYQEGYDTAMTLKSRLQLLAVTPSEYTQYSNRKKQQSASVRLAQGAIIDKVEVENRSHYESDKLERFIQFEQGTSLNSDYIEDKIHALYATNRFETI…
1	209	GC_00000003	flanking	ES401	71456	36.7	38.3											30.097	1.17e-08	WP_116986099	phosphoenolpyruvate--protein phosphotransferase, partial [Escherichia coli]	MELNTIDYRITFFVKDQGLPPQVASQLTRLAKKFKSLVYIDNITQNRSTNAESSLGLLQVGLCPGDFCQLITVGMDAEWANFVLTDLLSSTFDFVASDKLCDFSETITNTYPQLTPQCEVDFHYVKAQAVLSKFEILKGLSQLIYPKESDELLLALIKREERSSTAMAKQIALPHVISPYVEKPTIAIIRSDYPVDWASKMGDVNVIIALVLPEKPTKEMIMAATYLTRSLLSEDFSQRLVHTRQPKGLQALILYAMCQLL
1	277	GC_00000004	flanking	ES401	71456	36.7	38.3	K01809	mannose6phosphate isomerase [EC:5.3.1.8]	M00114	Pathway modules; Carbohydrate metabolism; Other carbohydrate metabolism	M00114	Ascorbate biosynthesis, plants, fructose6P > ascorbate					61.893	1.01e-173	WP_005478337	mannose-6-phosphate isomerase, class I [Vibrio parahaemolyticus]	MNALKPQTFYPMTNVIQDYAWGSHTSIEALFDIKNSTGKPQAELWMGAHPNGCSAVTVNGDSVLLSDLINQDKEAFLSKTTADAFGELPYLFKVLAAEKALSIQVHPNKQQAVDGFEKEEKTGIALTAFNRNYKDNNHKPELVYALTDYKAMNGFRDYQEIVSLFSAMQLPTIASYVDELAQKPNSNGLQRFFKAILSLENETKERAVAELLDYASSSTDELFVLLQDLAIQYPNDVGLFAPLMLNVITLKPGEAMFLSACTPHAYIHGTGLEIMANSDNVLRAGLTPKYMDIDELMSCTEFVSQPLSSLLTQPNTVDGGMSYPIPVNDFKFSVFTATDALTLETNSAEILFAIDSDLTLTHENGDSVTVAKGHSVFVPAYAKRYSLTSSGNVARAYN
1	345	GC_00000005	conserved_T6SS	ES401	71456	36.7	38.3											50	4.63e-11	P96156	Chitodextrinase; AltName: Full=Endo-chitodextinase; Flags: Precursor	MIKLNKITVAITSVMFSGYLYAADASATSNVVTFVPGETKVQNGDMVSFNGDCFVAKNNPGVWESPTADSWFWDVAECSGEPNPGPDPNPGPNPTPDPDLGDIIPFIPGKTQVENGDVVSYENQCFIAQNNPGVWETPSASSWFWTLTECSDEPVNPEPEVTELSILAPTAGQVLTANEAISINAHVDGNLAAKVEFWANNTKLAEKTVNQNNTQYSQTWTPSEEGNATINVFVFDKNNQKIEQKSVSVTVKAEVTEDFVAPVVKFVTPANGSTMNVTESLSISLNATDADNDLATLVVKANNKEICSFDAANTDTFACDWQPTQAGNVTLNAIATDAQDLSSTATVRITVEEDVVEPPVEPPVTPGDLCKDFNVYPDWTRGDHATGGDIMVHDNIAYS…
1	409	GC_00000006	conserved_T6SS	ES401	71456	36.7	38.3	K11892	type VI secretion system protein ImpK									24.8	1.8e-08	WP_010910863	type VI secretion system protein TssL, long form [Mesorhizobium japonicum]	MSYVEDDVTVVLFQPEPGKPMEVMPAPDLSRNISVSELDISSMGINPLVDQFSWLIASLSCMSSIPWLDDPMPFREQVAREIRKGERMLNEMEVDRASILVIRYCLCAAMDESVCRQEWGANSNWSQNSLLSEFHNETSGGDKFFVILDRLKADPRKYRHVIEFLYLLLQLGFKGKYGRAERGAESLTEIGNTIYRLVRDERLAEQEKVALVDVKSKYLKKPLKRVLPPKLILGVSALLFAAMYAATYLVIDVRFQKLLSLYQ
1	410	GC_00000006	conserved_T6SS	ES401	71456	36.7	38.3	K11892	type VI secretion system protein ImpK									24.8	7.64e-09	WP_010910863	type VI secretion system protein TssL, long form [Mesorhizobium japonicum]	MSSIPWLDDPMPFREQVAREIRKGERMLNEMEVDRASILVIRYCLCAAMDESVCRQEWGTNSNWSQNSLLSEFHNETSGGDKFFVILDRLKADPRKYRHVIEFLYLLLQLGFKGKYGRAERGAESLTEIGNTIYRLVRDERLAEQEKVALVDVKSKYLKKPLKRVLPPKLILGVSALLFAAMYAATYLVIDVRFQKLLSLYQ
1	449	GC_00000007	conserved_T6SS	ES401	71456	36.7	38.3	K20276	large repetitive protein									41.606	1.24e-98	WP_011105819	hypothetical protein [Vibrio parahaemolyticus]	MVYVSRCHLFTNKYNACSLITTTRFHIFMRIFSFLKLCAGLGLILLISSCGGESKDTSPPKRETTSVSGILFDAPIAGARVVLWEYANGAIGKKLGETRTSSKGDYSMEVNSGSMPVLLQAFGGAYTDPATGEVVYEGDGKTLKFESTAYFYENKANRIMLTPLSLISKGLADYKIHKLGMNAEGAIDSANSTISSMYGFDVITVEPIDIVKGGQSAYVTAGHQYGAYLTAYSVFSSDLIKKYPASDSSSIYTSFTLSDIMYRDISADGQLDGYETDNISGLDKKISFGKESVSVETYTNILSQYILITVNNNRLNVSGTNPNDYKPFASKVNKLGTTPETMTVFPPRTEVPIDDTEPMVERSDKDVLVRLDSLDLLVKDNVGTKSLRVSLQYQDDLGW…
1	489	GC_00000008	conserved_T6SS	ES401	71456	36.7	38.3	K11906	type VI secretion system protein VasD									26.984	4.76e-15	WP_010910850	type VI secretion system lipoprotein TssJ [Mesorhizobium]	MRKLLTFSLIFLLSGCTMWDQFKESTGITPETSSIELIITADKVLNVREGGQSSPVILRIHELNSPVLFRNLDFFALFENDKDALGDEYIKRYEYQIQPGDVVHETLVLDPATRAIGFSVAFRDINGSSWRKVELIEEKSEYFLKLNLKESELSSNNTRGIEQIYF
1	527	GC_00000009	conserved_T6SS	ES401	71456	36.7	38.3	K11893	type VI secretion system protein ImpJ									33.107	7.81e-84	WP_005463797	type VI secretion system baseplate subunit TssK [Vibrio parahaemolyticus]	MSLYNPVVWQDGMFMKPQHFQQLDRFQGKQSGMLSGFESPLHWGIKRIEINTELLALGKIGITHAEGILQDRTPFDLPLHASLPEVKDVDASVANKVLYLCCPLPSERSELFGTSKDGARYSIHTQDAVDACYDSEEIANITIGKLNFCLMYEDEDKSAYTSIPILKISEVKPDGSIILDNAYIPTCIDINASTVLKKFTTEFASMLRHRAESIVQRLGVVDQQGVSSVSDFMLLQALNRYEPLFWHFANIEGVHPEAFYRVLLQAEGELATLCSSSRRPQEFVPYNHGNLTSCLSTILHNSKVTLSVMSEQRAIPLPLKEQGYGIRIAPISDRSIVESTTFILAVKADVTLDILHTQFVSQTKIGSIDNIRELINLQLPGINIKPMPVVPRALPYHAG…
1	565	GC_00000010	conserved_T6SS	ES401	71456	36.7	38.3											66.5	9.05e-98	WP_011105828	hypothetical protein [Vibrio parahaemolyticus]	MAKPIQLGFMALIMACSLPAFAKGERYGIAANFKTIESTEYEQGMSGELSTISYGLVHTRPIDENNNRWRWLFGFNYLSDYIEAPKNGVYQEVTNYEFRIVPQYALGNWWAFTPYVGAGLSLGYSQYGNRWKVDNEGYKYGNQLEDIDQFEVGAVLSFGTVIKLGSNPDAHLQIIPQASYIQPIYNDGLGGLELSVSLLF
1	603	GC_00000011	conserved_T6SS	ES401	71456	36.7	38.3											39.706	0.000541	WP_117539334	FHA domain-containing protein [Coprococcus catus]	MHLNQLTLFITKSPEEYTGSKHIEMPESGGSLGRNPSNTVSLVDHNRFISGSHCLISIYGDTYYLSDVSTNGTLVNGNKLLKNQPISLYDGDTIVLGRYEISVGLEKLSNSINIAADISEETDSTDPLVNLAEYTPDEEQDKGNIADLFKETRIDKVDSSDPVAHLNFITQTNNDEHLLHGNEKKHKQKINEPVHTRQLLDDSDSVHSEFDIPNLIPEDWFSDDFSNSLNSTQSINEEIGSAPSIPDPIVQPAVELTPEPVVSPVSEQQSWEDVTQTIQTSNSTIESTNDDFFAASSMPTDVYSSPMQSIENPYSSKTEDAKNAFYKGLGMSAAQIEQTDEQFFQQMGNCLRLCINNLQKELSELKAIKNNEQDDSMTNIVELMLSLNHQQLLSPNELI…
1	641	GC_00000012	conserved_T6SS	ES401	71456	36.7	38.3											30.882	1.68e-20	WP_116949140	Lrp/AsnC family transcriptional regulator [Jiangella endophytica]	MSNMNLQGLDKLDRRIISNLLSNGRESIANLSRNVGLSRTAVAERINRLEKTGIIKGYTAQIRMGNKDENASSYLLISCNKGQKDSVSDGLKEIPEVKMTSIVGGTYDIICLIEAPDLHRIHYLCSEIESLSGIKEVKNTIVLHQPVCR
1	677	GC_00000013	conserved_T6SS	ES401	71456	36.7	38.3	K11901	type VI secretion system protein ImpB									40	2.67e-32	WP_117580760	type VI secretion system contractile sheath small subunit [Enterobacter]	MSRDGSVAPKERINIRYVPATGDVQEDVELPLSMMVVGDFTARTDETPIEDRTPINIDKDNFNDVMEGYSPNVKVNVDNKLSDEEGAQLGVDLTFNSMKDFSPEAIAKSVPELNGLLELREALVALKGPLGNVPAFRKKIAAVLQDEEARQKLLEELNIGSAKEEAKAE
1	713	GC_00000014	conserved_T6SS	ES401	71456	36.7	38.3	K11905	type VI secretion system protein													MEKGYRLLERIELGEPKNCYEKVVSHKHLIESIHLHLADLLNTHAGNAMIDNDYGLPDFNDVLSNNTNLVRNIQQNIKASIEKFEPRMRNVEVHYRHDNNNPLQLGFGIGGEVIHNGGKVPMAINIFMGVDGQFNV
1	749	GC_00000015	conserved_T6SS	ES401	71456	36.7	38.3	K11900	type VI secretion system protein ImpC									60.288	0	WP_117611541	type VI secretion system contractile sheath large subunit [Escherichia coli]	MTAEAQAPEQEAALVESGSLLDSILNETRLKPSDEGFDVAKRGVEAFIGELLSTNTSDKVDQSLVDLMISEIDQKLSKQVDAILHNKEVQAIESTWRGLKYLVDHTDFRENIQIELISAKKDEVLDDFEDAPEVVKSGLYKQIYTREYGQFGGKPVGAVICDFQMSASSPDIKLMEYMANVGAMSHAPFITSASAKFFGLDSYEELPNLKDLKSVFEGPQYTKWRGFREHEDARYVGLCTSRMMLRTPYSVEDNPIKAFDYNEHVKDGHDNYLWGNSAYAMASKISESFAKYRWCPNIIGPQSGGTVSDLPVYNYESMGQIETKIPTEILISDRREYELAEEGFIALTMRKGSDNAAFFSANSVQKAKVFPNTPEGQQAEMNYKLGIQLPYMFIINRLA…
1	785	GC_00000016	conserved_T6SS	ES401	71456	36.7	38.3	K11903	type VI secretion system secreted protein Hcp									51.163	4.3e-64	WP_137712216	Hcp family type VI secretion system effector [Brenneria rubrifaciens]	MPTPAYMSIKGETQGDITKDAYSADSVGNVWQEAHVDEFLVQELDHVLTVPRDPQSGQPTGQRVHRPVVVTKQQDRCSPLLFNALVSGEKLPECSINFYRTSTSGKQEHYYTIKLIDALLVDMQTRMAHCQDAAMADRVTEEVLKFTYRAIEVTHETCGTAGNDDWRTPREA
1	821	GC_00000017	conserved_T6SS	ES401	71456	36.7	38.3											45.455	1.51e-07	WP_117031792	DUF2169 domain-containing protein, partial [Klebsiella pneumoniae]	MQLWDIDSESPFTLKGRFQRDSEGHEVWVLSMKRAWTFLDGSWSEEVDNLELNDDPIYLGEPGFSAMVADHDFPIYKKNTDVLIYGKARSYAKKPVHSQLCRVLIDEHIDKTLKVVGERHWVDHSGSITVSTTQPFIERDIDYSNAIGGDERNRIGGGAAETNAELLKAKVPSIFYPDQNWQASSKKVKVAGFGPMPPFFHDRAKWAGTFDEKWFEERRPVWPLDFDARFYQSAPQDQQCNGYLQGGERLMVSGFCHNDALSFRIPSEKFQAVAVFNGKEEKINMPMYTLWIDTENKRIEATYTAAFPCQNREHLLTSSYLVELS
1	857	GC_00000018	conserved_T6SS	ES401	71456	36.7	38.3	K11895	type VI secretion system protein ImpH									33.131	5.21e-55	WP_000348794	type VI secretion system baseplate subunit TssG [Escherichia coli]	MIQYIVNKPCDYSFFQAVSLLEKHYQNLPGIEYKAIGENQYVKNEYIQFSVSPKLSFPKSDIEFISEFERNDAVYTQIEVNFMGLHGVSSPLPASYTEKLAGRDPDDNPVKEFFDFFHHRYISMLYRVWKKYRYHIQYKSDAKDPFSGRLLHLVGLSSVIQESSEVDLDRAKLLSYVNQLSTRTRSPKLVSGIVSHYFSLSNVYIEEWVYRRITIAASQRNCLNRKNCQLGGDFHLGQSMADLTGKFNLCIDDIDFDTYVKFLPGGALHETLIGLMKFILCDPMAWDLKLTVRNKSLPINQLGDGLGNELGQTFWLGTTKGEETKIKIVGSN
1	893	GC_00000019	conserved_T6SS	ES401	71456	36.7	38.3	K11914	sigma54 dependent transcriptional regulator									42.415	2.71e-78	WP_126397535	sigma 54-interacting transcriptional regulator [Blastochloris tepida]	MSLAKSDSLNNALLAISQSLADRSQLALTLDAILAAARQLTFADHGIIYVLDQTGQALLPSVVHHNEHILADHPWQPLTLESIDETDPFSFAIQNGEVVLINDLYQYNGYQCDEIYQNESILNRKSKNLLAWPLIDNEKNTVGLLVLFDLNVINDEASLTCFCQMAATNIRQAVWLEKYGYMIKELSEDNASLTRENNQLKQRKQSKYNGPIAESEVMINALARLNKVLLLPVDVLIRGETGVGKEVIAKYIHENSNRSKQALIVQNCAAIPEQLLESELFGHKKGAFTGADKDKIGLFEAADGGTLFLDEIGDMPLLLQAKLLRVLQERKFRPIGSNKEISVDVRVLAATHANLLSKIKKNEFRADLFYRLNVFPITIPPLRERQEDIIPLSEHFIKL…
1	929	GC_00000020	conserved_T6SS	ES401	71456	36.7	38.3															MKPYLLLLPAALIVTGCSNQTSVPDPLAPYKNVHIIGNKKQSIGSFNYLSKDVDGHTDKQVIVYFNEIPFTSTFNLCADKGVYIANCKSTVSIFPSKNKGVIFNYDLNFYNGSYPARVGSMNILLPSTTTRKMDNLTQYTSAKFSEEQFLESETLEEATFILMQSS
1	965	GC_00000021	conserved_T6SS	ES401	71456	36.7	38.3	K11891	type VI secretion system protein ImpL									22.863	3.19e-67	AFJ27267	IcmF-like protein [Escherichia coli Xuzhou21]	MIKNTLARTPFILSTVISAFFALLLVGVYYLWFNQADLRLLWGMLGVIFSIYAIFNLTLYIKKRKSKSHQNIETEEDTLSMVLKPLLNKAGKKPVYLVLGNKGSGKNQFLNVSNAIKPMDKVKNVKNDFFEWSESDSAVYIKPNHRLTFQEISSNDSLLWDALINEVIKHKPRKPFAGCMLLIDFEFLIVHDDEQTDYTLNALLQRLESIKETTGATLPLYLIMTKLDKLEGFKEYIHFSPLKSSVEFLAIPLKDAKGAILDYFRDSYKNIVKVMESNALDSSSYTNNPDEKQTILAFPKQFELCEKEISRIIERLNELNQGTYSVDIREVFFSSSLQGGRKYNLLAKSCSNYFNLPIIASEHGQLTETPYFTRFLVDAKVLPESDYSAENQHYLKRIQ…
[truncated: 1,462 more rows]

## Sheet: Table_S7
Table S7. Blastp comparison of TssCL and TssC protein sequences
Protein 1: Name	Protein 1: Genbank ID	Protein 2: Name	Protein 2: Genbank ID / Uniprot ID	% ID	E-value
Leisingera sp. ANG-M7 cluster 1 TssCL	WP_241482695.1	Cohaesibacter marisflavi TssCL	SFO84733.1 / A0A1I5KIT3_9RHIZ	51.31	2e-168
[truncated: 42 more rows]

## Sheet: Table_S8
Table S8. Predicted T6SS cluster 1 effectors of Leisingera sp. ANG-M7
[truncated: 41 more rows]
